# Supplementary material for: Chondrosarcoma organoids reveal SHH pathway activation driven by PTCH1 and BCOR alterations
Source: Sci Rep. 2025 Dec 19;16:3239. doi: 10.1038/s41598-025-33061-z (PMC12830980; doi:10.1038/s41598-025-33061-z)
Supplement: Supplementary file 1 — Supplementary Material 1 [file 41598_2025_33061_MOESM1_ESM.xlsx]

## Sheet: Sheet1
Primers used in qPCR
Name		Sequence	Experiment
ACTB	Forward	CATGTACGTTGCTATCCAGGC	qPCR
	Reverse	CTCCTTAATGTCACGCACGAT
GLI1	Forward	AGCGTGAGCCTGAATCTGTG	qPCR
	Reverse	CAGCATGTACTGGGCTTTGAA
GLI2	Forward	CTGCCTCCGAGAAGCAAGAAG	qPCR
	Reverse	GCATGGAATGGTGGCAAGAG
GLI3	Forward	GAAGTGCTCCACTCGAACAGA	qPCR
	Reverse	GTGGCTGCATAGTGATTGCG
PTCH1	Forward	GAAGAAGGTGCTAATGTCCTGAC	qPCR
	Reverse	GTCCCAGACTGTAATTTCGCC
SMO	Forward	GAAGTGCCCTTGGTTCGGA	qPCR
	Reverse	GCAGGGTAGCGATTCGAGTT
