# Supplementary material for: Chondrosarcoma organoids reveal SHH pathway activation driven by PTCH1 and BCOR alterations
Source: Sci Rep. 2025 Dec 19;16:3239. doi: 10.1038/s41598-025-33061-z (PMC12830980; doi:10.1038/s41598-025-33061-z)
Supplement: Supplementary file 2 — Supplementary Material 2 [file 41598_2025_33061_MOESM2_ESM.xlsx]

## Sheet: Diff_genes_heatmap_Tumor-Normal
Differentially expressed genes in CS tumors and ODX compared with normal tissues
Regulation	Ensembl ID	log2 Fold Change	Adj.Pval	Symbol	Chr	Type	Normal_1029CS	Normal_1077CS	Tumor_1029CS	ODX_1029CS	Tumor_1077CS	ODX_1077CS
Up	ENSG00000139219	12.311	0.00576	COL2A1	12q13.11	protein_coding	0	0.257303	12.191	12.7054	10.38	14.4823
Up	ENSG00000060718	11.6904	0.00948	COL11A1	1p21.1	protein_coding	0	0.168964	12.1228	13.6581	9.05444	12.2643
Up	ENSG00000157766	11.1807	0.00375	ACAN	15q26.1	protein_coding	0.71715	0.0657047	12.3018	12.6645	9.8697	11.4524
Up	ENSG00000112280	10.6435	0.0163	COL9A1	6q13	protein_coding	0.133546	0.0588886	11.0702	12.4998	7.51575	11.8731
Up	ENSG00000092758	10.6329	0.014	COL9A3	20q13.33	protein_coding	1.79794	1.29096	13.4188	13.7768	9.21833	12.2955
Up	ENSG00000105664	10.448	0.00279	COMP	19p13.11	protein_coding	1.20141	0.180544	12.1225	11.1282	11.4601	9.84522
Up	ENSG00000049089	10.4165	0.0164	COL9A2	1p34.2	protein_coding	0.395137	0.64549	12.3145	12.8374	7.99348	10.6018
Up	ENSG00000145681	10.1016	0.015	HAPLN1	5q14.3	protein_coding	0	0	8.87811	12.7071	8.13335	10.6877
Up	ENSG00000132031	10.0388	0.0408	MATN3	2p24.1	protein_coding	0.44891	0.105228	11.9771	13.6287	6.59287	9.06488
Up	ENSG00000206290	10.0275	0.0228	COL11A2	CHR_HSCHR6_MHC_QBL_CTG1	protein_coding	0.7338	0	11.4249	12.3889	6.89931	10.8647
Up	ENSG00000127743	9.8719	0.0202	IL17B	5q32	protein_coding	0.780746	0	11.9137	11.8154	7.07449	10.2455
Up	ENSG00000182600	9.60515	0.00505	SNORC	2q37.1	protein_coding	1.99455	1.57286	11.9053	12.3646	9.59427	11.6913
Up	ENSG00000136110	9.58646	0.0138	CNMD	13q14.3	protein_coding	0	0.108075	10.6577	10.846	6.87835	10.1799
Up	ENSG00000108821	9.56196	0.00858	COL1A1 ENSG00000108821	17q21.33	protein_coding	3.23216	3.34935	14.8072	11.9458	13.2797	11.3782
Up	ENSG00000261857	9.48684	0.00564	MIA	19q13.2	protein_coding	0	0	9.65367	10.9071	7.78509	9.60153
Up	ENSG00000137441	9.37568	0.025	FGFBP2	4p15.32	protein_coding	0.34021	0.753379	10.2944	12.4139	6.71658	10.265
Up	ENSG00000137801	9.28021	0.00691	THBS1	15q14	protein_coding	0.502407	0.876084	9.57689	11.863	9.74426	8.69369
Up	ENSG00000170891	9.26351	0.0626	CYTL1	4p16.2	protein_coding	0	0	9.68086	13.9564	6.1007	7.31611
Up	ENSG00000182492	8.9818	0.0078	BGN	Xq28	protein_coding	2.85175	2.89761	13.5475	12.4253	10.7911	10.6621
Up	ENSG00000122176	8.93929	0.0118	FMOD	1q32.1	protein_coding	2.43087	1.26134	11.2848	12.5505	8.85902	10.4473
Up	ENSG00000230930	8.13025	0.0598	COL11A2	CHR_HSCHR6_MHC_DBB_CTG1	protein_coding	0.238534	0.837559	11.0015	11.4386	5.76342	6.46972
Up	ENSG00000162510	8.09097	0.0512	MATN1	1p35.2	protein_coding	0.217604	0.105997	7.71516	11.3948	4.77912	9.12199
Up	ENSG00000181195	8.02499	0.0357	PENK	8q12.1	protein_coding	1.10455	0.837509	11.6583	10.2064	7.58353	6.53593
Up	ENSG00000197249	7.86015	0.0157	SERPINA1	14q32.13	protein_coding	0.835475	0.286131	9.11255	9.87848	6.16799	8.52479
Up	ENSG00000118523	7.8121	0.017	CCN2	6q23.2	protein_coding	2.96309	2.14799	11.649	11.8899	9.17605	8.75566
Up	ENSG00000164692	7.63901	0.00511	COL1A2	7q21.3	protein_coding	4.42665	4.767	13.315	11.4734	12.8016	11.3533
Up	ENSG00000125740	7.59612	0.0197	FOSB	19q13.32	protein_coding	3.38037	0.35157	7.95189	10.8782	9.29101	9.72727
Up	ENSG00000111799	7.59375	0.00137	COL12A1	6q14.1	protein_coding	2.03446	1.62763	10.0644	9.42478	8.73575	9.47425
Up	ENSG00000160161	7.57075	0.00274	CILP2	19p13.11	protein_coding	0.0297751	0.0650497	8.18287	8.15748	6.62468	7.50764
Up	ENSG00000112559	7.40534	0.0178	MDFI	6p21.1	protein_coding	0.435562	0.398777	9.4729	8.34397	5.62562	7.84755
Up	ENSG00000149257	7.22445	0.00579	SERPINH1	11q13.5	protein_coding	3.3853	2.78776	10.5758	11.2061	8.96888	10.4931
Up	ENSG00000224963	7.21963	0.0211	ECMXP	Xq28	transcribed_unitary_pseudogene	0	0	9.21721	6.8327	5.16468	7.66394
Up	ENSG00000111199	7.16698	0.0108	TRPV4	12q24.11	protein_coding	0.0522879	0	7.67584	7.37306	5.40657	8.31703
Up	ENSG00000164176	7.07413	0.0246	EDIL3 ENSG00000164176	5q14.3	protein_coding	0.432574	0.359331	7.45343	9.7832	5.48582	7.15789
Up	ENSG00000168542	7.03175	0.0332	COL3A1	2q32.2	protein_coding	3.54243	4.23657	11.9277	10.212	13.0296	8.51564
Up	ENSG00000134013	7.02918	0.0102	LOXL2	8p21.3	protein_coding	0.9984	1.42012	9.09588	9.27487	6.73056	7.85246
Up	ENSG00000132561	7.02442	0.0125	MATN2	8q22.1	protein_coding	1.40797	1.67805	9.47738	9.08923	6.63687	9.06625
Up	ENSG00000113140	7.02172	0.00323	SPARC	5q33.1	protein_coding	6.29799	7.29513	13.9828	14.5858	13.5002	13.2044
Up	ENSG00000124159	6.9851	0.0198	MATN4	20q13.12	protein_coding	0	0.367228	6.92117	6.59178	5.73894	9.42298
Up	ENSG00000167642	6.98197	0.0129	SPINT2	19q13.2	protein_coding	0.113438	0.707383	7.08171	8.61112	5.70718	8.1695
Up	ENSG00000175592	6.95237	0.00693	FOSL1	11q13.1	protein_coding	0	0.327645	7.40917	6.31141	8.40123	6.34297
Up	ENSG00000083782	6.91058	0.0138	EPYC	12q21.33	protein_coding	0	0	5.87823	8.66087	5.84885	7.25439
Up	ENSG00000115414	6.87061	0.0158	FN1	2q35	protein_coding	4.29519	4.64378	12.8156	9.87333	12.2332	10.4383
Up	ENSG00000139329	6.84557	0.0287	LUM	12q21.33	protein_coding	4.02153	2.71401	9.86861	10.8928	12.1173	7.97463
Up	ENSG00000125398	6.83861	0.0091	SOX9	17q24.3	protein_coding	1.15903	0.781513	8.76982	8.35438	6.26262	7.8487
Up	ENSG00000135919	6.77154	0.0354	SERPINE2	2q36.1	protein_coding	1.26098	2.53744	9.77266	10.5969	7.97303	6.34041
Up	ENSG00000186340	6.76403	0.00439	THBS2	6q27	protein_coding	0.719256	1.09923	8.75505	7.01288	7.17607	7.7491
Up	ENSG00000123500	6.72156	0.0547	COL10A1	6q22.1	protein_coding	0.0760624	0	8.50561	5.01498	4.46456	9.0532
Up	ENSG00000164932	6.70889	0.00292	CTHRC1	8q22.3	protein_coding	1.88341	0.919094	8.12807	8.7448	8.14025	7.42745
Up	ENSG00000121005	6.67272	0.0871	CRISPLD1	8q21.13	protein_coding	0.763897	0.654739	8.07527	10.8411	3.96979	6.64204
Up	ENSG00000115318	6.60794	0.0177	LOXL3	2p13.1	protein_coding	1.17273	0.708314	8.71608	8.38067	5.55057	7.54653
Up	ENSG00000041982	6.56108	0.0221	TNC	9q33.1	protein_coding	0.767112	0.401262	8.61503	7.80016	7.18251	4.98336
Up	ENSG00000160307	6.56022	0.0448	S100B	21q22.3	protein_coding	1.43247	0.361411	8.10444	9.92257	5.03758	6.76406
Up	ENSG00000113083	6.55	0.00484	LOX	5q23.1	protein_coding	0.307757	0.550044	8.04171	6.75441	7.02019	6.09928
Up	ENSG00000119147	6.54934	0.0995	ECRG4	2q12.2	protein_coding	2.79241	3.15656	11.7932	12.3864	7.11722	6.79845
Up	ENSG00000141756	6.54762	0.00464	FKBP10	17q21.2	protein_coding	2.84275	2.17061	9.82472	9.38445	8.07528	8.93276
Up	ENSG00000258947	6.49209	0.00729	TUBB3	16q24.3	protein_coding	0.0757407	0.0843283	7.20263	5.14459	7.04742	6.89387
Up	ENSG00000138795	6.44203	0.0272	LEF1	4q25	protein_coding	0.0928474	0.195889	7.694	8.16266	4.48954	5.99941
Up	ENSG00000278275	6.41847	0.00505		8q24.21	transcribed_processed_pseudogene	0	0	5.90195	5.7474	6.47773	7.54681
Up	ENSG00000188783	6.38996	0.0234	PRELP	1q32.1	protein_coding	1.81809	2.5579	9.15317	10.3994	6.85681	7.90245
Up	ENSG00000171812	6.35335	0.0123	COL8A2	1p34.3	protein_coding	0.185713	0.0612993	6.9607	7.77756	5.05449	6.11466
Up	ENSG00000152952	6.34996	0.0101	PLOD2	3q24	protein_coding	1.24152	1.07809	6.76015	9.10196	7.18905	6.98787
Up	ENSG00000137285	6.30742	0.00574	TUBB2B	6p25.2	protein_coding	0.884237	1.72602	8.06285	8.29048	6.55495	7.5419
Up	ENSG00000118785	6.28823	0.0283	SPP1	4q22.1	protein_coding	0.119106	0.131074	7.97082	7.166	6.42146	4.095
Up	ENSG00000140839	6.27273	0.0167	CLEC18B	16q23.1	protein_coding	0.402898	0.164696	6.99551	5.75237	5.27983	8.19842
Up	ENSG00000284746	6.24605	0.0354		8p23.1	transcribed_unprocessed_pseudogene	0	0	4.52597	5.08514	6.82601	8.54706
Up	ENSG00000164106	6.24145	0.0403	SCRG1	4q34.1	protein_coding	0.11892	0.0312103	6.70296	8.77	4.24435	5.54876
Up	ENSG00000068078	6.21042	0.0876	FGFR3	4p16.3	protein_coding	1.10917	0.57439	7.97863	9.06442	3.12545	8.0403
Up	ENSG00000109625	6.20036	0.0355	CPZ	4p16.1	protein_coding	0	0.27911	6.98144	7.6803	7.02336	3.67457
Up	ENSG00000185499	6.13541	0.00597	MUC1	1q22	protein_coding	0.316862	0.158332	7.5297	5.69978	6.42473	5.83782
Up	ENSG00000177106	6.11719	0.0247	EPS8L2	11p15.5	protein_coding	1.61408	0.955073	9.2357	7.57078	5.56263	7.23795
Up	ENSG00000163993	6.09838	0.0552	S100P	4p16.1	protein_coding	0	0.336449	7.8183	4.56599	4.29294	8.38919
Up	ENSG00000143320	6.08925	0.0283	CRABP2	1q23.1	protein_coding	1.41189	0.883684	7.09919	5.02484	8.52235	8.30178
Up	ENSG00000106484	6.0707	0.0136	MEST	7q32.2	protein_coding	1.0005	1.34636	6.42681	8.48345	6.11084	7.95542
Up	ENSG00000082196	6.06722	0.00706	C1QTNF3	5p13.2	protein_coding	1.92685	1.84757	7.61834	9.06024	8.15794	6.98119
Up	ENSG00000143127	6.06449	0.0214	ITGA10	1q21.1	protein_coding	0.932374	1.1109	7.67699	7.65073	4.96849	8.0483
Up	ENSG00000198373	6.04773	0.0275	WWP2	16q22.1	protein_coding	3.63834	3.71578	11.5709	9.6761	7.7073	9.94483
Up	ENSG00000100196	6.02835	0.00724	KDELR3	22q13.1	protein_coding	0.828107	0.609039	5.7292	7.49733	6.29388	7.46727
Up	ENSG00000106333	6.02053	0.00511	PCOLCE	7q22.1	protein_coding	4.3878	3.42175	10.5533	9.03682	9.86864	10.2425
Up	ENSG00000077274	6.00369	0.0361	CAPN6	Xq23	protein_coding	0.557038	0.630883	6.53748	7.82022	4.1181	7.9148
Up	ENSG00000102265	5.99953	0.0469	TIMP1	Xp11.3	protein_coding	3.6554	3.30771	10.2975	9.22388	11.5232	6.87971
Up	ENSG00000160360	5.99859	0.0105	GPSM1	9q34.3	protein_coding	1.62594	0.701339	7.89464	7.00114	5.867	7.88614
Up	ENSG00000142871	5.9638	0.0234	CCN1	1p22.3	protein_coding	4.90693	2.65865	10.3123	11.0684	8.81438	8.79138
Up	ENSG00000163975	5.9599	0.0258	MELTF	3q29	protein_coding	1.93334	1.29784	8.35407	7.94459	5.37281	8.63049
Up	ENSG00000157322	5.92892	0.0417	CLEC18A	16q22.1	protein_coding	0.237306	0	7.93368	6.66124	3.53078	6.06458
Up	ENSG00000111341	5.92685	0.0692	MGP	12p12.3	protein_coding	5.80236	5.8494	11.5876	14.767	11.5177	9.13863
Up	ENSG00000113739	5.89469	0.0488	STC2 ENSG00000113739	5q35.2	protein_coding	0.585616	1.21167	7.81715	8.62659	4.14257	6.58703
Up	ENSG00000117394	5.85442	0.000659	SLC2A1	1p34.2	protein_coding	0.787621	0.88377	6.60903	6.35385	7.08454	6.71305
Up	ENSG00000090530	5.85229	0.0177	P3H2	3q28	protein_coding	0.76461	0.373525	7.03058	7.89018	5.24319	5.52151
Up	ENSG00000130635	5.84946	0.0462	COL5A1	9q34.3	protein_coding	2.81181	2.19081	10.3721	7.18284	9.50278	6.34541
Up	ENSG00000142227	5.84137	0.00554	EMP3	19q13.33	protein_coding	3.49451	2.96404	9.07632	8.10169	9.21784	9.88673
Up	ENSG00000110811	5.83055	0.00404	P3H3	12p13.31	protein_coding	1.88949	1.23334	8.05329	7.45548	6.58193	7.47718
Up	ENSG00000106624	5.798	0.02	AEBP1	7p13	protein_coding	2.74403	3.26505	10.2995	8.26427	9.34931	7.29704
Up	ENSG00000110092	5.79573	0.00125	CCND1 ENSG00000110092	11q13.3	protein_coding	1.46448	1.0684	7.49764	7.11437	6.63504	7.00163
Up	ENSG00000157335	5.76966	0.0246	CLEC18C	16q22.1	protein_coding	0	0.103355	6.22966	4.70149	4.67167	7.68255
Up	ENSG00000196136	5.76909	0.0821	SERPINA3	14q32.13	protein_coding	0.577529	3.83198	9.34372	9.66672	7.6173	5.26762
Up	ENSG00000019549	5.76579	0.0027	SNAI2	8q11.21	protein_coding	1.51764	0.330538	6.64829	6.47691	6.61209	7.02223
Up	ENSG00000137267	5.76412	0.00369	TUBB2A	6p25.2	protein_coding	3.26816	2.75872	9.62395	8.44878	8.7136	8.32391
Up	ENSG00000160801	5.75027	0.0579	PTH1R	3p21.31	protein_coding	2.69588	2.57593	9.64879	7.01667	6.28285	10.5964
Up	ENSG00000103489	5.74719	0.0124	XYLT1	16p12.3	protein_coding	0.152224	0.349977	6.32948	7.23417	4.73657	5.69295
Up	ENSG00000154096	5.72325	0.0325	THY1	11q23.3	protein_coding	1.82575	1.78127	8.56679	5.4052	8.95695	7.1781
Up	ENSG00000181458	5.71806	0.00266	TMEM45A	3q12.2	protein_coding	0.434196	0.218683	5.76922	6.51308	5.45329	6.44243
Up	ENSG00000142552	5.67603	0.00882	RCN3	19q13.33	protein_coding	3.45695	2.88368	10.0699	8.85935	8.25889	8.19721
Up	ENSG00000124216	5.66077	0.00105	SNAI1	20q13.13	protein_coding	0.484297	0.588759	6.51294	5.85002	5.95022	6.47599
Up	ENSG00000168140	5.65455	0.0014	VASN	16p13.3	protein_coding	1.55056	1.16632	7.25678	6.52116	7.36373	6.91028
Up	ENSG00000099194	5.65254	0.0212	SCD	10q24.31	protein_coding	0.471908	0.192365	5.94152	5.25228	4.89895	7.84597
Up	ENSG00000140937	5.65017	0.00139	CDH11	16q21	protein_coding	0.886673	0.76888	5.97398	6.90927	6.65117	6.37736
Up	ENSG00000161249	5.63835	0.0236	DMKN	19q13.12	protein_coding	0.598406	0	7.67633	5.92072	4.3554	5.79778
Up	ENSG00000176890	5.62546	0.0164	TYMS	18p11.32	protein_coding	1.06345	0.345471	6.90436	6.18387	4.81305	7.4184
Up	ENSG00000184557	5.62077	0.0166	SOCS3	17q25.3	protein_coding	2.73487	3.31638	7.33331	10.0626	8.92608	8.2636
Up	ENSG00000167244	5.60568	0.0299	IGF2	11p15.5	protein_coding	5.34927	4.24179	11.7908	8.81913	9.52426	11.4707
Up	ENSG00000076604	5.59896	0.00471	TRAF4	17q11.2	protein_coding	1.25263	1.39844	7.66298	7.31912	6.22858	6.48729
Up	ENSG00000100399	5.59475	0.0451	CHADL	22q13.2	protein_coding	1.17994	0.764617	8.28661	7.39946	4.1086	6.47345
Up	ENSG00000244486	5.5871	0.0102	SCARF2	22q11.21	protein_coding	1.42363	1.27852	7.98994	6.96136	5.69969	7.10171
Up	ENSG00000166557	5.58417	0.00139	TMED3	15q25.1	protein_coding	1.37073	1.21016	6.51957	7.33374	6.57712	7.06805
Up	ENSG00000101194	5.58371	0.017	SLC17A9	20q13.33	protein_coding	0.403086	1.1983	7.05682	5.53153	5.31777	7.63148
Up	ENSG00000120738	5.57299	0.0628	EGR1	5q31.2	protein_coding	6.10202	1.78912	8.84699	11.1314	9.35316	8.7427
Up	ENSG00000136026	5.56855	0.0115	CKAP4	12q23.3	protein_coding	2.62706	3.21967	8.55569	8.90456	7.1456	9.3618
Up	ENSG00000084636	5.56009	0.0119	COL16A1	1p35.2	protein_coding	3.53879	5.09564	10.5248	10.5316	9.45807	8.99474
Up	ENSG00000275031	5.55866	0.00876	METRNL	CHR_HSCHR17_1_CTG9	protein_coding	2.11977	0.656663	6.0688	7.01439	7.61555	7.08878
Up	ENSG00000134285	5.54696	0.00125	FKBP11	12q13.12	protein_coding	1.49131	0.687071	6.53645	6.80472	6.4559	6.74755
Up	ENSG00000138080	5.5462	0.0123	EMILIN1	2p23.3	protein_coding	2.56342	2.58542	8.85265	9.02345	6.85804	7.74834
Up	ENSG00000131435	5.54346	0.0385	PDLIM4	5q31.1	protein_coding	1.76962	1.96898	8.3694	5.07697	8.82888	7.37578
Up	ENSG00000163710	5.53929	0.0101	PCOLCE2	3q23	protein_coding	2.13662	1.89826	8.27125	8.28048	6.3307	7.34448
Up	ENSG00000160200	5.52767	0.023	CBS ENSG00000160200	21q22.3	protein_coding	0.827854	0.657174	6.2662	5.7863	4.93186	8.09636
Up	ENSG00000204262	5.51108	0.0138	COL5A2	2q32.2	protein_coding	1.88673	1.94386	8.24377	6.58744	8.43778	6.4365
Up	ENSG00000064666	5.51008	0.00554	CNN2	19p13.3	protein_coding	1.75605	1.32888	7.51404	6.34395	6.57936	7.77282
Up	ENSG00000091513	5.50714	0.0217	TF	3q22.1	protein_coding	0.726646	0.930544	4.84943	6.02142	6.49615	7.97593
Up	ENSG00000139289	5.50384	0.00837	PHLDA1	12q21.2	protein_coding	0.497869	0.84577	5.70757	7.21208	6.46879	5.31421
Up	ENSG00000131459	5.50246	0.00282	GFPT2	5q35.3	protein_coding	1.48813	1.44737	6.8344	6.53267	7.72694	6.78684
Up	ENSG00000075618	5.47185	0.0231	FSCN1	7p22.1	protein_coding	2.34471	1.94016	8.19345	6.51233	6.55092	9.20045
Up	ENSG00000106976	5.44444	0.0363	DNM1	9q34.11	protein_coding	1.80463	1.35929	9.30344	5.67883	6.88196	6.24139
Up	ENSG00000087245	5.43555	0.00377	MMP2	16q12.2	protein_coding	3.57734	3.917	9.50433	8.40052	9.7094	9.11664
Up	ENSG00000162493	5.41052	0.0331	PDPN	1p36.21	protein_coding	2.39212	3.82522	7.89852	10.6363	7.69365	7.84827
Up	ENSG00000189320	5.4069	0.0118	FAM180A	7q33	protein_coding	0.144917	0.0981015	6.05053	4.1259	5.66353	6.27366
Up	ENSG00000163430	5.38525	0.00252	FSTL1	3q13.33	protein_coding	3.42032	3.54539	8.191	9.01543	9.30465	8.96136
Up	ENSG00000105472	5.3822	0.0464	CLEC11A	19q13.33	protein_coding	2.15411	2.08485	8.83336	6.04311	5.91836	9.21188
Up	ENSG00000156966	5.38202	0.0085	B3GNT7	2q37.1	protein_coding	0.390701	0.178461	6.1855	6.53411	4.74073	5.20606
Up	ENSG00000166794	5.3741	0.000906	PPIB	15q22.31	protein_coding	4.74189	4.51714	9.63102	10.3061	9.97136	10.106
Up	ENSG00000183160	5.3676	0.0328	TMEM119	12q23.3	protein_coding	0.814696	1.0529	8.12378	4.43601	6.44974	6.19608
Up	ENSG00000130035	5.34203	0.021	GALNT8	12p13.32	protein_coding	0.616085	0.103604	5.06143	6.32124	4.35552	7.0693
Up	ENSG00000172349	5.33787	0.0162	IL16	15q25.1	protein_coding	0.755589	0.422649	6.16464	5.40866	4.80108	7.33358
Up	ENSG00000251493	5.32024	0.0838	FOXD1	5q13.2	protein_coding	0	0.0633276	6.41244	6.51881	1.99007	6.48629
Up	ENSG00000125844	5.31514	0.00163	RRBP1	20p12.1	protein_coding	3.50237	3.17704	9.08241	8.39908	8.28664	8.85127
Up	ENSG00000163359	5.29121	0.0119	COL6A3	2q37.3	protein_coding	3.30542	3.62591	9.98108	7.83419	8.98204	8.23019
Up	ENSG00000087303	5.28508	0.0127	NID2	14q22.1	protein_coding	2.49444	1.60226	8.01016	7.55229	6.00181	7.76946
Up	ENSG00000173546	5.28412	0.0158	CSPG4	15q24.2	protein_coding	2.73647	2.97352	8.3885	8.39124	6.6203	9.15642
Up	ENSG00000197903	5.28099	0.0282	H2BC12	6p22.1	protein_coding	2.13295	1.80146	7.2717	9.05967	5.68836	6.97304
Up	ENSG00000187243	5.27066	0.00419	MAGED4B	Xp11.22	protein_coding	0.390277	0.46452	6.4286	5.59205	4.97866	5.79292
Up	ENSG00000178882	5.26111	0.0417	RFLNA	12q24.31	protein_coding	2.14265	2.26185	7.82929	7.50712	5.2764	9.24061
Up	ENSG00000136826	5.24718	0.0196	KLF4	9q31.2	protein_coding	3.00403	2.63659	6.55367	8.77529	9.17816	7.76285
Up	ENSG00000104549	5.2464	0.0122	SQLE	8q24.13	protein_coding	0.231241	0.222555	4.62905	4.93007	5.54653	6.78752
Up	ENSG00000124813	5.23327	0.0304	RUNX2	6p21.1	protein_coding	0.360981	0.200971	5.52188	6.98045	3.57486	5.97978
Up	ENSG00000169439	5.23201	0.0168	SDC2	8q22.1	protein_coding	3.5418	3.25831	7.88279	8.89766	7.68724	10.0606
Up	ENSG00000171848	5.19742	0.00616	RRM2	2p25.1	protein_coding	0.0765741	0	5.89399	4.9125	4.39717	5.73915
Up	ENSG00000153898	5.19727	0.0537	MCOLN2	1p22.3	protein_coding	0.304295	0	6.34171	5.97511	2.66773	6.41312
Up	ENSG00000167617	5.19524	0.0577	CDC42EP5	19q13.42	protein_coding	0.0101611	0.017577	7.73414	5.46914	3.65931	3.97384
Up	ENSG00000116661	5.18731	0.0509	FBXO2	1p36.22	protein_coding	0.643091	0.544111	7.35299	6.52833	3.28361	5.95873
Up	ENSG00000105894	5.18574	0.0173	PTN	7q33	protein_coding	1.21362	0.948623	6.21013	6.83529	4.75003	7.27201
Up	ENSG00000129009	5.17436	0.00458	ISLR	15q24.1	protein_coding	3.51997	3.11617	8.43619	7.68356	8.85736	8.99261
Up	ENSG00000101825	5.17122	0.0452	MXRA5	Xp22.33	protein_coding	0.175961	0.275492	6.26268	5.61856	6.71925	2.98732
Up	ENSG00000011028	5.16747	0.00389	MRC2	17q23.2	protein_coding	3.98541	2.93854	9.17328	8.57431	8.30012	8.47006
Up	ENSG00000179820	5.16446	0.00172	MYADM	19q13.42	protein_coding	3.09697	2.61357	7.92995	8.48111	8.00126	7.66659
Up	ENSG00000112655	5.16104	0.00216	PTK7	6p21.1	protein_coding	0.720072	0.464827	6.36952	5.62435	5.57213	5.44794
Up	ENSG00000026025	5.14285	0.00571	VIM	10p13	protein_coding	7.20968	6.24872	12.3409	12.1404	11.9213	11.0857
Up	ENSG00000157227	5.11989	0.00386	MMP14	14q11.2	protein_coding	2.60464	3.15447	8.53932	7.54176	8.34015	7.57654
Up	ENSG00000005513	5.11603	0.0226	SOX8	16p13.3	protein_coding	1.23669	0.609755	7.28542	6.60811	4.50743	5.75606
Up	ENSG00000147408	5.11571	0.0597	CSGALNACT1	8p21.3	protein_coding	1.57322	0.971924	6.08404	8.59887	4.12308	6.74713
Up	ENSG00000149043	5.08684	0.0361	SYT8	11p15.5	protein_coding	0	0	7.03466	5.20349	3.4458	4.66341
Up	ENSG00000203618	5.08395	0.066	GP1BB	22q11.21	protein_coding	1.4315	0.947561	8.56712	5.27666	4.2013	7.04885
Up	ENSG00000187955	5.07547	0.0258	COL14A1	8q24.12	protein_coding	1.24623	1.77642	6.44255	5.81311	8.42338	5.66812
Up	ENSG00000169071	5.06586	0.00369	ROR2	9q22.31	protein_coding	0.0604902	0	4.42445	5.10265	5.74208	5.11522
Up	ENSG00000171310	5.0657	0.0169	CHST11	12q23.3	protein_coding	0.145276	1.07545	4.54627	6.72077	5.17506	6.26214
Up	ENSG00000115325	5.06532	0.0545	DOK1 ENSG00000115325	2p13.1	protein_coding	1.67576	0.909989	8.22328	7.07646	4.13323	5.99982
Up	ENSG00000083857	5.05233	0.0091	FAT1	4q35.2	protein_coding	1.07758	1.62026	5.99677	5.92661	7.55725	6.12437
Up	ENSG00000122691	5.05226	0.0139	TWIST1	7p21.1	protein_coding	0.303154	0.0893273	6.18327	3.9276	5.67442	5.20873
Up	ENSG00000164294	5.04952	0.00425	GPX8	5q11.2	protein_coding	0.579539	0.722253	5.03811	6.27981	5.42492	6.05884
Up	ENSG00000020633	5.04622	0.0346	RUNX3	1p36.11	protein_coding	0.0963509	0.633943	6.51643	6.51069	3.49946	5.11889
Up	ENSG00000256984	5.04229	0.0141		12p11.21	transcribed_processed_pseudogene	0	0	5.05238	4.33064	4.36698	6.41917
Up	ENSG00000198682	5.03389	0.0226	PAPSS2	10q23.2	protein_coding	1.8946	2.09694	7.29296	8.12094	5.31777	7.38697
Up	ENSG00000164161	5.0332	0.0448	HHIP	4q31.21	protein_coding	0.0824546	0.208071	6.29647	6.37378	2.90518	5.13842
Up	ENSG00000155660	5.02795	0.0136	PDIA4 ENSG00000155660	7q36.1	protein_coding	2.44026	2.54836	7.43239	8.47032	6.23849	7.94785
Up	ENSG00000168077	5.01766	0.0128	SCARA3	8p21.1	protein_coding	0.635128	0.652302	5.68731	6.82557	5.58653	4.5461
Up	ENSG00000153976	5.01564	0.0587	HS3ST3A1	17p12	protein_coding	0.168494	0.0850452	5.9228	6.90977	2.6751	5.06195
Up	ENSG00000054598	5.00309	0.012	FOXC1	6p25.3	protein_coding	1.11928	0.821904	5.31191	7.20917	5.31766	6.056
Up	ENSG00000049540	4.99978	0.031	ELN	7q11.23	protein_coding	3.74068	2.89405	9.19265	6.98225	9.69828	7.39541
Up	ENSG00000130164	4.9983	0.0111	LDLR	19p13.2	protein_coding	1.44232	0.703217	5.74729	5.06957	6.64455	6.82284
Up	ENSG00000131473	4.99496	0.00758	ACLY	17q21.2	protein_coding	2.33311	2.91885	7.40593	8.23585	6.72603	8.11595
Up	ENSG00000131242	4.98726	0.0274	RAB11FIP4	17q11.2	protein_coding	0.0420742	0.0309039	4.72103	4.70391	3.80924	6.86084
Up	ENSG00000109814	4.98687	0.0119	UGDH	4p14	protein_coding	1.50819	1.46001	5.57781	7.08198	7.38058	5.8435
Up	ENSG00000136830	4.98337	0.00373	NIBAN2	9q34.11	protein_coding	2.88337	2.60643	8.32928	7.47453	7.14935	7.95993
Up	ENSG00000175063	4.97385	0.0275	UBE2C	20q13.12	protein_coding	0	0	5.06661	4.35101	3.74068	6.73709
Up	ENSG00000187091	4.97193	0.0113	PLCD1	3p22.2	protein_coding	2.52951	1.61503	7.96765	6.54381	6.25566	7.40968
Up	ENSG00000103335	4.97192	0.0229	PIEZO1	16q24.3	protein_coding	3.33582	2.5802	8.00211	6.29993	8.4536	8.9641
Up	ENSG00000196739	4.97018	0.08	COL27A1	9q32	protein_coding	3.30731	2.58668	9.42005	9.90979	5.98576	6.35309
Up	ENSG00000176692	4.96965	0.0117	FOXC2	16q24.1	protein_coding	0.198412	0.362068	5.99608	5.37812	5.63595	3.9894
Up	ENSG00000197747	4.96647	0.0121	S100A10	1q21.3	protein_coding	5.3642	4.2709	9.67008	8.83708	10.7285	9.90043
Up	ENSG00000182580	4.94763	0.0241	EPHB3	3q27.1	protein_coding	0.249166	0.161583	5.76428	5.64246	3.33007	5.87521
Up	ENSG00000060982	4.94108	0.0173	BCAT1	12p12.1	protein_coding	0.610928	0.12732	4.70859	6.52463	4.23697	5.77061
Up	ENSG00000123989	4.92927	0.0069	CHPF	2q35	protein_coding	2.58477	2.75392	7.73269	7.07161	7.06766	8.5225
Up	ENSG00000123384	4.92468	0.00383	LRP1	12q13.3	protein_coding	3.89267	3.94247	9.19839	8.73087	8.13275	9.307
Up	ENSG00000092621	4.92323	0.0302	PHGDH	1p12	protein_coding	1.1086	1.02436	5.47916	5.47578	5.03097	7.97293
Up	ENSG00000006747	4.91503	0.0385	SCIN	7p21.3	protein_coding	0.402783	0.424912	4.59704	5.80593	3.75583	7.15673
Up	ENSG00000135046	4.91334	0.0181	ANXA1	9q21.13	protein_coding	4.19246	3.18192	8.59332	7.76355	9.9844	8.06084
Up	ENSG00000242265	4.91203	0.0212	PEG10	7q21.3	protein_coding	1.00004	0.675883	5.7296	5.42811	4.56031	7.28197
Up	ENSG00000133110	4.90738	0.0684	POSTN	13q13.3	protein_coding	1.3224	1.73647	7.45896	5.21107	8.55567	4.52155
Up	ENSG00000144810	4.90718	0.0603	COL8A1	3q12.1	protein_coding	0.824309	1.34144	7.17375	6.71702	6.73947	3.33
Up	ENSG00000167123	4.90267	0.0766	CERCAM	9q34.11	protein_coding	2.38523	2.44239	9.34937	7.77612	7.55214	4.58831
Up	ENSG00000105880	4.90129	0.0878	DLX5	7q21.3	protein_coding	0.602496	0	6.58943	5.81613	2.09819	6.30639
Up	ENSG00000074410	4.8992	0.0229	CA12	15q22.2	protein_coding	0	0	4.77863	5.29533	3.35643	6.1664
Up	ENSG00000116285	4.89795	0.00125	ERRFI1	1p36.23	protein_coding	2.31401	2.58208	7.073	7.7104	7.16298	7.43761
Up	ENSG00000115884	4.89633	0.00836	SDC1	2p24.1	protein_coding	0	0.0878443	5.88067	5.16692	4.16213	4.55128
Up	ENSG00000120885	4.89015	0.036	CLU	8p21.1	protein_coding	5.18622	4.78675	9.4208	11.1898	10.8219	8.07405
Up	ENSG00000134532	4.86379	0.0152	SOX5	12p12.1	protein_coding	0.47229	0.115244	4.38359	6.52298	4.5976	5.12604
Up	ENSG00000104783	4.86085	0.0692	KCNN4	19q13.31	protein_coding	0.24255	0	5.72173	2.15909	5.99501	6.05266
Up	ENSG00000134824	4.84274	0.0248	FADS2	11q12.2	protein_coding	2.56098	2.77089	8.0482	7.22601	5.97617	8.78431
Up	ENSG00000112773	4.84179	0.00854	TENT5A	6q14.1	protein_coding	0.987099	0.291758	4.88746	6.23649	5.90722	4.89369
Up	ENSG00000011422	4.84066	0.0998	PLAUR	19q13.31	protein_coding	0.942601	1.79732	5.54875	3.95838	9.1503	6.18506
Up	ENSG00000132000	4.83392	0.0756	PODNL1	19p13.12	protein_coding	0.675428	0.777184	8.0617	5.77593	5.02859	3.3747
Up	ENSG00000154640	4.83023	0.00706	BTG3	21q21.1	protein_coding	1.02008	1.17235	5.28241	5.43595	6.73472	6.25267
Up	ENSG00000184232	4.82922	0.0121	OAF	11q23.3	protein_coding	3.31748	2.28447	7.40899	6.65455	8.37247	8.08477
Up	ENSG00000172061	4.82755	0.0048	LRRC15	3q29	protein_coding	0.0416215	0.0231631	5.48156	4.07812	4.96401	4.91607
Up	ENSG00000116337	4.82479	0.00132	AMPD2	1p13.3	protein_coding	2.2676	1.5594	6.59977	6.89358	6.68748	6.77235
Up	ENSG00000177542	4.82389	0.0286	SLC25A22	11p15.5	protein_coding	0.926645	0.290683	6.74694	5.83748	3.75436	5.39143
Up	ENSG00000157613	4.82293	0.0357	CREB3L1	11p11.2	protein_coding	1.16029	1.13286	7.55242	5.63679	6.46851	4.2203
Up	ENSG00000143515	4.82004	0.0118	ATP8B2	1q21.3	protein_coding	1.41222	1.03486	6.73551	6.16003	4.83409	6.44468
Up	ENSG00000198417	4.81769	0.0377	MT1F	16q13	protein_coding	1.06437	0.487058	5.29149	7.12755	6.16708	3.7875
Up	ENSG00000120708	4.8173	0.0315	TGFBI	5q31.1	protein_coding	3.80309	3.55437	9.83635	7.09374	9.39913	7.65489
Up	ENSG00000134531	4.78959	0.0417	EMP1	12p13.1	protein_coding	2.20571	3.19728	6.81125	7.58116	9.45079	6.12114
Up	ENSG00000204323	4.78705	0.0569	SMIM5	17q25.1	protein_coding	0.504058	0.579788	5.48525	6.04847	2.92546	6.85672
Up	ENSG00000100003	4.7866	0.00268	SEC14L2	22q12.2	protein_coding	0.220346	0.26501	5.03549	5.56354	4.52154	4.99655
Up	ENSG00000172819	4.78608	0.0201	RARG	12q13.13	protein_coding	2.67616	1.89319	7.03533	7.19985	5.75342	8.2944
Up	ENSG00000115380	4.78129	0.0282	EFEMP1	2p16.1	protein_coding	2.47046	2.55311	5.95895	7.93826	8.71553	6.55955
Up	ENSG00000125144	4.77006	0.0453	MT1G	16q13	protein_coding	1.0523	1.64748	5.11466	7.95116	6.76323	4.65073
Up	ENSG00000117122	4.76445	0.0326	MFAP2	1p36.13	protein_coding	1.23299	0.996241	6.9385	5.17193	7.05305	4.35277
Up	ENSG00000067606	4.76257	0.0509	PRKCZ	1p36.33	protein_coding	0.434459	0.0975218	6.08075	6.39001	2.84851	4.79499
Up	ENSG00000105281	4.75825	0.00958	SLC1A5	19q13.32	protein_coding	1.61864	2.20789	6.33478	6.40473	6.1851	7.76145
Up	ENSG00000099860	4.75138	0.0216	GADD45B	19p13.3	protein_coding	3.57245	4.12804	7.05845	8.69909	9.57253	9.07643
Up	ENSG00000095739	4.74226	0.032	BAMBI	10p12.1	protein_coding	0.635885	0.831341	6.07473	6.96643	3.96254	4.89978
Up	ENSG00000076382	4.73527	0.0229	SPAG5	17q11.2	protein_coding	1.08568	0.28272	5.67158	3.84102	6.34182	5.82345
Up	ENSG00000152661	4.71982	0.00691	GJA1	6q22.31	protein_coding	1.68382	1.67162	6.03079	6.77646	7.1118	5.67112
Up	ENSG00000183876	4.71528	0.0208	ARSI	5q32	protein_coding	0	0.106417	4.11085	3.9713	4.65859	6.33323
Up	ENSG00000144649	4.71398	0.0223	GASK1A	3p22.1	protein_coding	0.330906	0.165769	5.76301	5.66946	3.35071	5.06611
Up	ENSG00000117385	4.71367	0.0076	P3H1	1p34.2	protein_coding	2.94584	2.89	8.4351	7.98767	7.10185	7.00173
Up	ENSG00000198542	4.71044	0.0247	ITGBL1	13q33.1	protein_coding	1.13921	0.730199	6.33751	5.16752	6.82036	4.25521
Up	ENSG00000272398	4.70886	0.0713	CD24	6q21	protein_coding	0	0.13	3.95719	2.65079	5.61662	6.87083
Up	ENSG00000182379	4.69688	0.0568	NXPH4 ENSG00000182379	12q13.3	protein_coding	0.144565	0.35432	5.50315	4.54366	2.89418	6.84429
Up	ENSG00000169231	4.68943	0.019	THBS3	1q22	protein_coding	3.35947	2.86258	8.67231	8.64916	7.21658	6.66379
Up	ENSG00000167460	4.68628	0.00576	TPM4	19p13.12	protein_coding	4.39583	3.6317	8.72195	7.9676	9.2163	8.89435
Up	ENSG00000131747	4.68459	0.00561	TOP2A	17q21.2	protein_coding	0	0	4.57714	4.37818	4.21736	5.5657
Up	ENSG00000087116	4.68242	0.0314	ADAMTS2 ENSG00000087116	5q35.3	protein_coding	0.765583	1.31337	6.95843	4.83809	6.66057	4.43049
Up	ENSG00000117399	4.67954	0.0167	CDC20 ENSG00000117399	1p34.2	protein_coding	0	0.326422	5.66014	4.35	3.72672	5.63415
Up	ENSG00000139174	4.67665	0.0188	PRICKLE1	12q12	protein_coding	1.20636	1.15905	5.25124	6.32715	4.79229	7.06676
Up	ENSG00000072682	4.66893	0.00753	P4HA2	5q31.1	protein_coding	2.09987	2.61225	7.45609	6.21387	6.78994	7.64005
Up	ENSG00000169583	4.66678	0.00288	CLIC3	9q34.3	protein_coding	0.736363	0.30305	5.34297	5.19275	4.6355	5.57472
Up	ENSG00000146242	4.6626	0.0027	TPBG	6q14.1	protein_coding	1.07175	0.786985	5.65036	5.96326	5.72535	5.02889
Up	ENSG00000154545	4.66084	0.0119	MAGED4	Xp11.22	protein_coding	0.36894	0.0772662	5.08676	5.38311	3.66519	5.40071
Up	ENSG00000153234	4.65598	0.0294	NR4A2	2q24.1	protein_coding	1.5047	1.01127	4.2504	6.0617	7.23772	6.10604
Up	ENSG00000184702	4.65296	0.0612	SEPTIN5	22q11.21	protein_coding	3.29572	2.16544	8.78339	6.93797	5.24047	8.57233
Up	ENSG00000102359	4.64439	0.00733	SRPX2	Xq22.1	protein_coding	1.35496	0.71121	6.01744	6.3375	5.39746	4.95748
Up	ENSG00000089685	4.639	0.0272	BIRC5	17q25.3	protein_coding	0.2635	0.236902	5.56201	4.34708	3.4868	6.16091
Up	ENSG00000142156	4.63169	0.0354	COL6A1	21q22.3	protein_coding	6.39365	5.85767	12.5617	9.44317	10.7992	10.2254
Up	ENSG00000144802	4.62631	0.0193	NFKBIZ	3q12.3	protein_coding	1.01438	2.72371	5.46377	7.25572	6.77831	6.48363
Up	ENSG00000074842	4.61758	0.00548	MYDGF ENSG00000074842	19p13.3	protein_coding	3.75124	3.41795	8.13606	8.72056	7.4269	8.52517
Up	ENSG00000167619	4.60783	0.0926	TMEM145	19q13.2	protein_coding	0.70532	0.365665	5.75297	4.53383	2.74383	7.54268
Up	ENSG00000122877	4.5821	0.0306	EGR2	10q21.3	protein_coding	0.479102	0.763422	3.68421	6.56224	5.77765	4.78936
Up	ENSG00000131771	4.58136	0.0505	PPP1R1B	17q12	protein_coding	0.108779	0.0490341	6.50701	4.65101	2.7218	4.76124
Up	ENSG00000168913	4.57884	0.0923	ENHO	9p13.3	protein_coding	0.475726	0.147837	5.28568	5.48866	2.04297	6.7452
Up	ENSG00000176788	4.5745	0.0507	BASP1	5p15.1	protein_coding	1.02294	1.07906	6.18245	3.99388	7.51097	4.81469
Up	ENSG00000243449	4.57203	0.0085	C4orf48	4p16.3	protein_coding	1.58396	1.63177	7.11636	5.90187	5.4523	6.24905
Up	ENSG00000103175	4.57035	0.0293	WFDC1	16q24.1	protein_coding	0.708143	0.50174	5.86555	4.88713	3.58598	6.36251
Up	ENSG00000103196	4.56381	0.0346	CRISPLD2	16q24.1	protein_coding	2.18776	2.32799	5.12075	7.26056	8.24201	6.66344
Up	ENSG00000167004	4.56247	0.0127	PDIA3	15q15.3	protein_coding	4.15856	4.92656	8.47941	9.67017	8.39559	9.87492
Up	ENSG00000103855	4.5603	0.0152	CD276	15q24.1	protein_coding	2.19891	2.0723	7.4641	6.22997	7.44485	5.64473
Up	ENSG00000100504	4.55969	0.014	PYGL	14q22.1	protein_coding	1.54186	2.04814	6.99926	7.06495	5.26802	6.08651
Up	ENSG00000112977	4.55652	0.00324	DAP	5p15.2	protein_coding	1.99713	1.86794	6.88707	6.01619	6.19954	6.85342
Up	ENSG00000116741	4.55632	0.0325	RGS2	1q31.2	protein_coding	1.73456	1.04395	5.6185	5.27982	7.78242	5.10157
Up	ENSG00000091986	4.55493	0.0416	CCDC80	3q13.2	protein_coding	2.87629	2.87034	6.06546	6.76301	9.35072	7.53379
Up	ENSG00000164949	4.55296	0.0878	GEM	8q22.1	protein_coding	0.809357	0.45484	4.67988	6.71216	6.71218	2.636
Up	ENSG00000138650	4.54961	0.0636	PCDH10	4q28.3	protein_coding	0.0144581	0.0316069	4.83441	6.37935	2.26733	4.8095
Up	ENSG00000105722	4.54763	0.00471	ERF	19q13.2	protein_coding	3.62798	3.41292	8.10342	7.84542	7.53864	8.78482
Up	ENSG00000074800	4.53332	0.00606	ENO1 ENSG00000074800	1p36.23	protein_coding	5.69321	5.92908	10.2037	10.3055	9.71706	11.1516
Up	ENSG00000129038	4.53146	0.0592	LOXL1	15q24.1	protein_coding	2.35883	2.29333	7.83479	4.44002	7.93264	7.22271
Up	ENSG00000117519	4.52901	0.0014	CNN3	1p21.3	protein_coding	3.11282	3.02707	7.16422	7.86173	7.70203	7.66781
Up	ENSG00000169902	4.52785	0.00048	TPST1	7q11.21	protein_coding	1.45132	1.37321	5.73161	5.96096	6.04221	6.02569
Up	ENSG00000197594	4.52594	0.0665	ENPP1	6q23.2	protein_coding	0.836935	0.686004	5.76434	7.51212	4.17982	3.69334
Up	ENSG00000106397	4.5257	0.00892	PLOD3	7q22.1	protein_coding	2.97392	2.99322	7.53413	7.55575	6.60559	8.34161
Up	ENSG00000135451	4.52443	0.0392	TROAP	12q13.12	protein_coding	0.161801	0	5.37686	3.70683	3.21732	6.12033
Up	ENSG00000138801	4.51814	0.0187	PAPSS1	4q25	protein_coding	1.75674	1.56859	6.19958	7.12023	4.81343	6.59
Up	ENSG00000106348	4.51661	0.0235	IMPDH1	7q32.1	protein_coding	2.3539	1.28724	7.14827	5.41779	5.51645	7.26621
Up	ENSG00000111087	4.51516	0.022	GLI1	12q13.3	protein_coding	0.478939	0.770079	5.44003	5.43906	3.617	6.0626
Up	ENSG00000176845	4.51474	0.0168	METRNL	17q25.3	protein_coding	1.07316	2.70064	6.67042	6.81793	6.71501	5.4032
Up	ENSG00000171223	4.51124	0.00373	JUNB	19p13.13	protein_coding	5.5645	5.86732	9.849	10.8702	10.2325	9.95689
Up	ENSG00000089327	4.5086	0.0171	FXYD5	19q13.12	protein_coding	3.6484	3.21078	8.90373	6.66085	8.16139	8.02681
Up	ENSG00000074047	4.49966	0.00439	GLI2	2q14.2	protein_coding	0.26596	0.69797	5.12884	4.49529	4.72037	5.582
Up	ENSG00000166598	4.49414	0.0156	HSP90B1	12q23.3	protein_coding	4.98307	5.36281	8.72446	10.1752	9.12564	10.643
Up	ENSG00000106809	4.48851	0.0272	OGN	9q22.31	protein_coding	0.81406	0.948083	4.60478	5.83747	6.77981	4.25627
Up	ENSG00000174028	4.47487	0.0127	FAM3C2P	Xp22.11	processed_pseudogene	0	0.310953	4.38054	4.84413	3.68293	5.61377
Up	ENSG00000146674	4.47038	0.0153	IGFBP3	7p12.3	protein_coding	3.28496	3.20895	7.39654	7.31084	9.04638	7.1156
Up	ENSG00000115738	4.46504	0.0823	ID2	2p25.1	protein_coding	2.84533	2.18009	5.0592	5.76726	8.84941	8.23514
Up	ENSG00000156535	4.46202	0.00891	CD109	6q13	protein_coding	0.333798	0.154511	4.57779	5.65713	3.99045	4.59934
Up	ENSG00000125841	4.45029	0.0097	NRSN2	20p13	protein_coding	0.850513	0.971567	6.2197	4.8251	4.70525	5.69526
Up	ENSG00000142632	4.44411	0.0342	ARHGEF19	1p36.13	protein_coding	0.545309	0.266705	5.94064	4.80804	3.09477	5.55699
Up	ENSG00000189409	4.44334	0.0618	MMP23B	1p36.33	protein_coding	0.795183	1.21096	6.78542	3.69701	6.89056	4.41268
Up	ENSG00000167695	4.42945	0.00377	TLCD3A	17p13.3	protein_coding	1.10953	0.628392	5.8108	5.46609	5.06336	4.85341
Up	ENSG00000183010	4.41883	0.0156	PYCR1	17q25.3	protein_coding	3.18794	2.64907	7.88776	8.02045	6.13505	7.30611
Up	ENSG00000123975	4.41415	0.0164	CKS2	9q22.2	protein_coding	1.85898	1.42843	4.80576	6.04611	6.65435	6.72521
Up	ENSG00000172201	4.40691	0.0286	ID4	6p22.3	protein_coding	1.36067	0.644723	5.52405	6.68004	3.93042	5.50393
Up	ENSG00000164741	4.39848	0.076	DLC1	8p22	protein_coding	1.09702	0.0815891	5.75868	7.027	3.91826	3.2472
Up	ENSG00000120254	4.39695	0.0109	MTHFD1L	6q25.1	protein_coding	0.102473	0.19038	4.17037	3.67784	5.00055	5.32474
Up	ENSG00000066248	4.39466	0.00505	NGEF	2q37.1	protein_coding	1.57661	0.391734	5.24283	5.35425	5.20186	5.7164
Up	ENSG00000104723	4.39261	0.0244	TUSC3	8p22	protein_coding	1.67203	1.34951	6.19839	7.04679	4.46366	5.90469
Up	ENSG00000101955	4.3831	0.0697	SRPX	Xp11.4	protein_coding	1.11164	1.96453	7.3893	5.49985	7.05398	3.74163
Up	ENSG00000135052	4.37754	0.00388	GOLM1	9q21.33	protein_coding	1.84318	2.22483	6.19138	6.82319	6.73738	5.89425
Up	ENSG00000137809	4.37041	0.0591	ITGA11	15q23	protein_coding	0.740882	0.652193	7.15187	5.09835	4.68629	3.33129
Up	ENSG00000150961	4.36099	0.00484	SEC24D	4q26	protein_coding	0.919455	1.51514	5.31508	6.26186	5.31172	5.4245
Up	ENSG00000182704	4.35772	0.00907	TSKU	11q13.5	protein_coding	1.21807	1.45164	5.86389	4.79314	5.68301	6.4303
Up	ENSG00000166803	4.35643	0.0185	PCLAF	15q22.31	protein_coding	1.02514	0.0658025	5.28642	5.19548	3.61928	5.50641
Up	ENSG00000164877	4.35574	0.0385	MICALL2	7p22.3	protein_coding	1.73126	2.00814	7.07682	4.3369	6.3794	7.10866
Up	ENSG00000148848	4.33683	0.0579	ADAM12	10q26.2	protein_coding	0	0.0338409	5.34979	4.22413	5.62985	2.21126
Up	ENSG00000105329	4.3357	0.0184	TGFB1	19q13.2	protein_coding	3.01174	1.88429	7.83632	5.84487	6.59303	6.86066
Up	ENSG00000187741	4.33466	0.0404	FANCA	16q24.3	protein_coding	0.806677	0.290948	6.31033	3.4981	4.08848	5.63698
Up	ENSG00000162511	4.3325	0.0635	LAPTM5	1p35.2	protein_coding	1.24635	1.70176	3.68301	5.59034	7.46498	6.48791
Up	ENSG00000115963	4.32899	0.0411	RND3	2q23.3	protein_coding	0.857932	1.55932	3.70552	5.75484	6.7926	5.89752
Up	ENSG00000176971	4.32518	0.0524	FIBIN	11p14.2	protein_coding	2.72941	2.35976	7.509	8.58007	5.23516	6.15482
Up	ENSG00000139263	4.32462	0.00691	LRIG3	12q14.1	protein_coding	1.7343	0.983728	5.76577	5.39451	5.19847	6.37578
Up	ENSG00000197329	4.31718	0.0292	PELI1	2p14	protein_coding	1.59576	1.20181	4.14354	6.83566	6.14907	5.73559
Up	ENSG00000111206	4.31655	0.023	FOXM1	12p13.33	protein_coding	0.680619	0.663355	5.91038	4.13953	4.04342	5.86083
Up	ENSG00000167397	4.3137	0.00722	VKORC1	16p11.2	protein_coding	3.9132	3.79779	7.99055	9.07383	7.74153	7.87086
Up	ENSG00000107731	4.31282	0.0291	UNC5B	10q22.1	protein_coding	0.856916	1.4369	5.93736	4.25602	4.86043	6.78511
Up	ENSG00000141582	4.30044	0.0438	CBX4	17q25.3	protein_coding	2.20065	1.09015	4.39695	7.02908	5.38081	6.97652
Up	ENSG00000065485	4.29859	0.00724	PDIA5	3q21.1	protein_coding	2.09862	1.11694	5.62255	6.20696	5.41136	6.38459
Up	ENSG00000142634	4.29411	0.017	EFHD2	1p36.21	protein_coding	2.05112	1.89548	6.60441	5.06505	7.18565	6.21454
Up	ENSG00000174938	4.29268	0.046	SEZ6L2	16p11.2	protein_coding	0.189904	0.336908	2.88246	6.26108	4.31398	4.76684
Up	ENSG00000104447	4.28701	0.0258	TRPS1	8q23.3	protein_coding	0.515463	0.61715	4.36932	6.14046	3.64948	5.25403
Up	ENSG00000138166	4.28654	0.0573	DUSP5 ENSG00000138166	10q25.2	protein_coding	0.548788	0.437541	3.48749	4.52711	6.97054	4.13366
Up	ENSG00000168453	4.28458	0.00256	HR	8p21.3	protein_coding	1.06091	1.53171	5.71492	5.7882	5.12535	5.69508
Up	ENSG00000225614	4.27976	0.00694	ZNF469	16q24.2	protein_coding	0.188281	0.562226	5.0677	3.81301	4.74756	4.99176
Up	ENSG00000059573	4.27548	0.0136	ALDH18A1	10q24.1	protein_coding	1.23159	1.34047	5.98424	6.34497	4.50121	5.41562
Up	ENSG00000145050	4.26984	0.00457	MANF	3p21.2	protein_coding	2.46824	3.12818	6.75594	6.74491	7.16507	7.6063
Up	ENSG00000077782	4.26764	0.0102	FGFR1 ENSG00000077782	8p11.23	protein_coding	3.81553	3.60184	9.02387	7.75902	7.50962	7.61281
Up	ENSG00000103187	4.26755	0.0306	COTL1	16q24.1	protein_coding	1.90034	2.33408	6.54284	4.82721	6.56871	7.60026
Up	ENSG00000137807	4.26653	0.012	KIF23	15q23	protein_coding	0.164139	0.0448641	4.36817	4.23042	3.51882	5.36672
Up	ENSG00000129911	4.26596	0.00779	KLF16	19p13.3	protein_coding	0.933697	1.36946	6.16793	4.80127	5.08272	5.61823
Up	ENSG00000112761	4.26191	0.056	CCN6	6q21	protein_coding	0.367891	0.0567833	5.06514	5.78372	2.33579	4.71235
Up	ENSG00000179431	4.2606	0.0253	FJX1	11p13	protein_coding	0.052868	0.455658	4.30755	5.88898	4.52902	3.3339
Up	ENSG00000069849	4.25965	0.0135	ATP1B3	3q23	protein_coding	3.0522	3.44989	7.13332	7.30059	8.66422	6.94465
Up	ENSG00000196576	4.25089	0.0189	PLXNB2	22q13.33	protein_coding	3.49668	2.77213	8.16328	6.95969	6.34042	8.07778
Up	ENSG00000104635	4.24912	0.0253	SLC39A14	8p21.3	protein_coding	1.90505	3.36723	6.76127	7.70835	7.36449	5.70692
Up	ENSG00000142765	4.24651	0.0833	SYTL1	1p36.11	protein_coding	0.971853	1.19513	6.84945	5.285	2.84783	6.33775
Up	ENSG00000122952	4.24317	0.0178	ZWINT	10q21.1	protein_coding	0.162623	0	5.05292	4.22032	3.08333	4.94133
Up	ENSG00000143387	4.24286	0.035	CTSK	1q21.3	protein_coding	2.13917	2.58947	6.4386	6.92494	7.98594	5.07924
Up	ENSG00000182158	4.24275	0.00285	CREB3L2	7q33	protein_coding	1.45077	1.38779	5.24049	5.88978	5.45117	6.06667
Up	ENSG00000109062	4.24142	0.0118	SLC9A3R1	17q25.1	protein_coding	1.49156	1.58117	6.19682	5.70294	4.76273	6.44864
Up	ENSG00000101057	4.24136	0.0436	MYBL2	20q13.12	protein_coding	0	0.0538384	4.9794	2.8133	3.52666	5.75375
Up	ENSG00000111665	4.23857	0.0329	CDCA3	12p13.31	protein_coding	0.377665	0.342325	5.21418	4.04703	3.23262	5.90042
Up	ENSG00000176014	4.23661	0.036	TUBB6	18p11.21	protein_coding	3.08132	2.9567	7.47627	5.57758	8.5568	7.41182
Up	ENSG00000149485	4.23557	0.0164	FADS1	11q12.2	protein_coding	0.992293	0.881464	5.73832	5.26491	3.91988	5.76669
Up	ENSG00000158321	4.23329	0.0369	AUTS2	7q11.22	protein_coding	3.04859	2.49673	7.97846	7.4069	5.20691	7.43151
Up	ENSG00000206190	4.22714	0.00198	ATP10A	15q12	protein_coding	0.253842	0.376124	4.23652	4.31517	4.75457	4.86225
Up	ENSG00000179388	4.22402	0.0384	EGR3	8p21.3	protein_coding	0.47046	0.74518	3.58303	5.6908	6.11905	3.93451
Up	ENSG00000166130	4.22148	0.00491	IKBIP	12q23.1	protein_coding	0.968607	0.767211	4.37994	5.31316	5.14438	5.52009
Up	ENSG00000169783	4.22118	0.0927	LINGO1	15q24.3	protein_coding	0.638761	0.497483	5.61451	6.90028	2.66374	3.97868
Up	ENSG00000100644	4.2158	0.015	HIF1A	14q23.2	protein_coding	2.18804	2.71349	6.40646	6.85407	7.65796	5.74778
Up	ENSG00000179218	4.2134	0.00386	CALR	19p13.13	protein_coding	5.50871	6.06011	9.98981	10.3787	9.46882	10.1539
Up	ENSG00000197555	4.21243	0.044	SIPA1L1	14q24.2	protein_coding	1.64823	1.94053	7.18713	7.13119	4.8691	4.83983
Up	ENSG00000123131	4.20371	0.0187	PRDX4	Xp22.11	protein_coding	3.50962	4.13893	7.41151	9.31572	7.51	7.87472
Up	ENSG00000071539	4.20244	0.0141	TRIP13	5p15.33	protein_coding	0.226039	0.104478	4.97026	5.03019	3.32291	4.14744
Up	ENSG00000075035	4.20223	0.0583	WSCD2	12q23.3	protein_coding	0.0357055	0	4.15962	5.10122	2.12149	5.49801
Up	ENSG00000156299	4.2013	0.0272	TIAM1	21q22.11	protein_coding	0.364586	1.01501	3.64049	5.98708	4.45263	5.48416
Up	ENSG00000075420	4.20032	0.0118	FNDC3B	3q26.31	protein_coding	1.44788	1.76344	5.55895	6.68156	6.02231	4.96111
Up	ENSG00000144136	4.19891	0.00513	SLC20A1 ENSG00000144136	2q14.1	protein_coding	2.12432	2.53198	7.24606	6.4046	6.22935	6.22821
Up	ENSG00000113161	4.19598	0.021	HMGCR	5q13.3	protein_coding	1.31851	0.812705	3.91433	5.55221	5.46852	6.11127
Up	ENSG00000164626	4.18251	0.0132	KCNK5	6p21.2	protein_coding	0	0	3.21187	4.61229	3.93196	4.97392
Up	ENSG00000158270	4.17824	0.0201	COLEC12	18p11.32	protein_coding	1.66812	1.03945	5.41984	6.67927	4.45969	5.56929
Up	ENSG00000099331	4.17413	0.0169	MYO9B	19p13.11	protein_coding	3.58271	2.81389	7.97564	6.18218	7.74949	7.58242
Up	ENSG00000188042	4.17209	0.0172	ARL4C	2q37.1	protein_coding	0.285467	0.29954	4.50414	3.73829	5.68921	3.92674
Up	ENSG00000130827	4.16429	0.0366	PLXNA3	Xq28	protein_coding	2.62488	2.00079	7.48128	6.04946	4.97563	7.40216
Up	ENSG00000157456	4.15419	0.0069	CCNB2	15q22.2	protein_coding	0	0.150885	4.04098	3.80224	4.00523	5.07009
Up	ENSG00000106080	4.13698	0.0188	FKBP14	7p14.3	protein_coding	0.751421	0.624864	4.79841	6.11342	4.13161	4.25707
Up	ENSG00000131873	4.13697	0.00357	CHSY1 ENSG00000131873	15q26.3	protein_coding	1.35491	1.70785	5.73659	5.33622	6.18879	5.4118
Up	ENSG00000159216	4.12927	0.0727	RUNX1	21q22.12	protein_coding	1.55866	1.59496	5.8437	4.13437	7.92138	4.92486
Up	ENSG00000170608	4.12445	0.0941	FOXA3	19q13.32	protein_coding	0	0	4.61996	5.95203	1.60341	4.32239
Up	ENSG00000078098	4.12374	0.0576	FAP	2q24.2	protein_coding	1.7566	1.77275	6.30612	4.12247	7.63017	5.49491
Up	ENSG00000149428	4.11747	0.0136	HYOU1	11q23.3	protein_coding	2.03325	2.38597	5.66485	6.41334	5.86681	7.36332
Up	ENSG00000188483	4.11643	0.046	IER5L	9q34.11	protein_coding	1.39839	0.997674	6.78957	4.07729	4.31852	6.07246
Up	ENSG00000106819	4.11473	0.0965	ASPN	9q22.31	protein_coding	1.7674	2.01275	6.19755	6.4467	7.88808	3.48687
Up	ENSG00000069188	4.10833	0.0315	SDK2	17q25.1	protein_coding	0.0113253	0.344359	4.39414	4.8331	2.6833	5.23416
Up	ENSG00000035862	4.10586	0.0106	TIMP2	17q25.3	protein_coding	4.04179	4.26208	8.59075	8.67829	8.52998	7.23213
Up	ENSG00000142173	4.1021	0.0639	COL6A2	21q22.3	protein_coding	6.82491	6.62109	12.6797	9.69748	11.4823	9.44088
Up	ENSG00000148926	4.10063	0.00323	ADM	11p15.4	protein_coding	2.7152	3.13221	7.41811	6.55902	7.07408	7.04615
Up	ENSG00000137745	4.09847	0.0125	MMP13	11q22.2	protein_coding	0	0	5.07384	4.09211	3.27741	3.95053
Up	ENSG00000162627	4.09816	0.00362	SNX7	1p21.3	protein_coding	1.02087	0.449812	4.54496	4.53876	5.05382	5.19645
Up	ENSG00000197496	4.09566	0.027	SLC2A10	20q13.12	protein_coding	0.285575	0.692562	4.70716	5.79166	3.25686	4.58324
Up	ENSG00000186480	4.0886	0.0576	INSIG1	7q36.3	protein_coding	1.72533	2.14905	5.22236	4.64026	7.93216	6.30839
Up	ENSG00000155254	4.08789	0.0166	MARVELD1	10q24.2	protein_coding	2.53814	1.58893	7.05808	6.46239	5.61912	5.46612
Up	ENSG00000140511	4.0792	0.00306	HAPLN3 ENSG00000140511	15q26.1	protein_coding	2.03788	1.97884	6.3891	5.53396	6.22768	6.19951
Up	ENSG00000136997	4.07548	0.0302	MYC	8q24.21	protein_coding	2.32924	3.78412	5.81262	7.56672	7.94289	7.20642
Up	ENSG00000162512	4.06878	0.0712	SDC3	1p35.2	protein_coding	2.286	1.54309	7.33738	7.09092	3.95371	5.5513
Up	ENSG00000163399	4.06649	0.00361	ATP1A1	1p13.1	protein_coding	3.47926	3.70221	7.06785	7.91474	7.76652	7.8798
Up	ENSG00000169515	4.06117	0.0654	CCDC8	19q13.32	protein_coding	0.763208	0.317647	5.90661	5.4097	2.45112	4.63896
Up	ENSG00000033100	4.06083	0.00505	CHPF2	7q36.1	protein_coding	2.37094	2.25858	6.63032	6.42597	5.67539	6.77067
Up	ENSG00000185222	4.0606	0.0145	TCEAL9	Xq22.2	protein_coding	2.90082	2.30389	6.3438	6.99957	7.50848	5.79997
Up	ENSG00000108829	4.05957	0.00445	LRRC59	17q21.33	protein_coding	2.4946	3.23884	6.43592	6.97593	7.10012	7.1932
Up	ENSG00000135750	4.05763	0.00733	KCNK1	1q42.2	protein_coding	0	0.0668938	3.42718	4.01365	4.83641	4.08706
Up	ENSG00000183853	4.05691	0.00373	KIRREL1	1q23.1	protein_coding	1.50718	1.22074	5.07375	5.2253	5.39634	5.98809
Up	ENSG00000144857	4.05171	0.0111	BOC	3q13.2	protein_coding	1.86911	2.2839	6.93854	6.41448	5.45883	5.70102
Up	ENSG00000169710	4.04517	0.0354	FASN	17q25.3	protein_coding	3.26891	2.16388	7.24825	5.15611	7.1986	7.4433
Up	ENSG00000006327	4.042	0.0732	TNFRSF12A	16p13.3	protein_coding	4.23505	1.25835	6.81782	5.83016	8.23396	6.27284
Up	ENSG00000120820	4.03241	0.00439	GLT8D2	12q23.3	protein_coding	1.71891	1.87978	5.41447	6.40776	5.94653	5.55826
Up	ENSG00000163191	4.03197	0.017	S100A11	1q21.3	protein_coding	4.8179	4.8573	9.31815	7.84883	9.7514	8.55992
Up	ENSG00000112769	4.03168	0.00464	LAMA4	6q21	protein_coding	2.26194	2.1344	5.81192	5.87704	6.74493	6.48549
Up	ENSG00000118257	4.02984	0.017	NRP2	2q33.3	protein_coding	1.80768	0.48478	4.67107	4.90364	6.1253	5.00428
Up	ENSG00000044574	4.02931	0.0123	HSPA5	9q33.3	protein_coding	4.19078	4.75127	7.56317	8.88056	9.12285	8.43474
Up	ENSG00000123416	4.02905	0.0108	TUBA1B	12q13.12	protein_coding	5.82574	5.30816	9.15892	9.18141	9.50408	10.5396
Up	ENSG00000101104	4.02112	0.0178	PABPC1L	20q13.12	protein_coding	1.64596	1.37294	5.99641	5.07158	4.58997	6.46431
Up	ENSG00000087077	4.02018	0.0174	TRIP6	7q22.1	protein_coding	3.07862	2.28698	7.55032	6.15839	5.92381	7.17942
Up	ENSG00000262655	4.01916	0.0946	SPON1	11p15.2	protein_coding	0.539311	0.571285	5.13338	2.83765	6.81922	3.50758
Up	ENSG00000198648	4.01847	0.0369	STK39	2q24.3	protein_coding	0.738496	1.50971	5.51934	6.48163	3.78516	4.78416
Up	ENSG00000093009	4.01692	0.0374	CDC45	22q11.21	protein_coding	0.0795836	0.248626	4.32194	3.39175	3.20523	5.80517
Up	ENSG00000186832	4.01537	0.0706	KRT16	17q21.2	protein_coding	0	0	5.69066	2.19958	4.88355	3.28767
Up	ENSG00000183098	4.01269	0.0326	GPC6 ENSG00000183098	13q31.3	protein_coding	0.245727	0.0822557	4.82821	5.33794	3.68182	2.85875
Up	ENSG00000135245	4.00797	0.0865	HILPDA	7q32.1	protein_coding	1.23893	0.797786	7.53499	3.95233	4.01375	4.60426
Up	ENSG00000148344	4.0058	0.0879	PTGES	9q34.11	protein_coding	0.382717	0.501562	4.24392	2.10653	5.49783	5.9435
Up	ENSG00000182718	4.00576	0.00768	ANXA2	15q22.2	protein_coding	5.70738	5.77903	9.82257	8.98551	10.4028	9.78502
Up	ENSG00000164111	4.00299	0.00997	ANXA5	4q27	protein_coding	4.91376	5.20004	8.54599	9.90059	9.22749	8.56548
Up	ENSG00000127564	4.00178	0.074	PKMYT1	16p13.3	protein_coding	0.568644	0.201082	6.08319	2.98031	3.09055	5.39254
Up	ENSG00000164611	4.00017	0.0132	PTTG1 ENSG00000164611	5q33.3	protein_coding	0.71277	1.65769	4.71285	4.63058	5.43278	5.96539
Up	ENSG00000080986	3.99817	0.0256	NDC80	18p11.32	protein_coding	0.328952	0.0665232	4.76252	3.93304	2.91821	5.16985
Up	ENSG00000038427	3.9976	0.0684	VCAN	5q14.2	protein_coding	0.859065	1.05947	4.40554	3.99253	7.25131	4.1781
Up	ENSG00000137563	3.99085	0.0531	GGH	8q12.3	protein_coding	1.32581	0.665111	3.52663	5.62959	4.26673	6.52227
Up	ENSG00000237172	3.98956	0.0243	B3GNT9	16q22.1	protein_coding	0.748328	0.359049	5.27857	5.47353	3.7635	3.65741
Up	ENSG00000136068	3.98103	0.0272	FLNB	3p14.3	protein_coding	3.81333	2.40209	6.53963	7.36072	6.29419	8.16041
Up	ENSG00000064886	3.98074	0.0928	CHI3L2	1p13.2	protein_coding	0.835578	0.331167	5.1123	4.76149	6.24603	2.13664
Up	ENSG00000175906	3.97572	0.00615	ARL4D	17q21.31	protein_coding	0.971444	0.790912	4.08615	5.13999	5.17327	5.0282
Up	ENSG00000140931	3.97248	0.00925	CMTM3	16q22.1	protein_coding	2.35482	1.54932	5.81463	5.21866	6.32903	6.3359
Up	ENSG00000142192	3.97157	0.0136	APP	21q21.3	protein_coding	4.93904	4.77474	8.60288	9.09499	7.93421	9.68179
Up	ENSG00000128595	3.9617	0.0198	CALU	7q32.1	protein_coding	4.33821	4.17249	7.12799	8.29872	8.158	9.28348
Up	ENSG00000122786	3.9598	0.0329	CALD1	7q33	protein_coding	4.14393	3.76566	7.06513	7.8362	7.27073	9.48632
Up	ENSG00000176720	3.95512	0.0438	BOK	2q37.3	protein_coding	1.01722	1.19105	6.07076	6.20696	3.98511	3.97421
Up	ENSG00000244731	3.95127	0.0588	C4A	6p21.33	protein_coding	2.62376	2.77402	6.81908	4.96275	6.40389	8.41492
Up	ENSG00000163132	3.95099	0.0162	MSX1	4p16.2	protein_coding	0.788962	1.15947	5.03056	4.62939	5.95346	4.08743
Up	ENSG00000171314	3.94548	0.00386	PGAM1 ENSG00000171314	10q24.1	protein_coding	4.21517	3.8847	8.20191	8.43327	7.59464	7.75186
Up	ENSG00000160957	3.94482	0.0636	RECQL4	8q24.3	protein_coding	1.03886	1.66083	6.10347	3.55828	4.70408	6.81283
Up	ENSG00000005448	3.94236	0.00397	WDR54	2p13.1	protein_coding	1.11512	0.596583	5.08595	4.58893	4.39992	5.11805
Up	ENSG00000196428	3.93339	0.0221	TSC22D2	3q25.1	protein_coding	1.99991	2.66244	4.94455	6.71811	6.77603	6.61956
Up	ENSG00000042493	3.93317	0.0409	CAPG	2p11.2	protein_coding	2.2928	1.86108	6.39778	4.2407	6.54811	6.85386
Up	ENSG00000103888	3.92932	0.00209	CEMIP	15q25.1	protein_coding	0.263503	0.108965	4.319	4.3152	4.11242	3.71559
Up	ENSG00000283149	3.91853	0.0732		3q27.3	protein_coding	0.320078	0	2.22171	3.50217	4.82634	5.76408
Up	ENSG00000142669	3.91845	0.0507	SH3BGRL3	1p36.11	protein_coding	4.31913	2.91419	9.03958	6.4908	7.93263	6.67744
Up	ENSG00000007237	3.91783	0.00484	GAS7	17p13.1	protein_coding	1.32486	2.05497	5.76301	5.21939	6.00775	5.44085
Up	ENSG00000168374	3.91766	0.0207	ARF4	3p14.3	protein_coding	4.00879	4.45515	6.88692	8.53388	8.3026	8.87513
Up	ENSG00000083444	3.90849	0.0392	PLOD1	1p36.22	protein_coding	4.09165	4.54437	8.79258	9.43419	6.7412	7.93803
Up	ENSG00000132205	3.90351	0.0142	EMILIN2	18p11.32	protein_coding	0.980354	1.104	4.51311	4.13391	5.39886	5.73688
Up	ENSG00000013810	3.90075	0.0391	TACC3	4p16.3	protein_coding	1.97876	1.86588	7.04987	5.8639	4.23337	6.14514
Up	ENSG00000153071	3.89978	0.0124	DAB2	5p13.1	protein_coding	1.88896	2.01084	5.41065	6.35991	6.52559	5.10257
Up	ENSG00000110080	3.89815	0.0168	ST3GAL4	11q24.2	protein_coding	1.32077	2.16847	6.63806	4.99739	5.22722	5.70839
Up	ENSG00000182481	3.89573	0.0442	KPNA2	17q24.2	protein_coding	2.1076	1.76365	4.46411	5.44196	7.40189	6.01743
Up	ENSG00000006042	3.88849	0.0314	TMEM98	17q11.2	protein_coding	1.43399	1.69789	4.92503	6.90681	5.52376	4.46215
Up	ENSG00000141696	3.88503	0.0229	P3H4	17q21.2	protein_coding	2.66414	2.51807	7.48787	6.81886	5.29309	6.3047
Up	ENSG00000164105	3.88477	0.0603	SAP30	4q34.1	protein_coding	1.71099	2.51301	6.63989	6.89518	3.94197	6.51002
Up	ENSG00000227402	3.88005	0.00469	SLC39A7	CHR_HSCHR6_MHC_MANN_CTG1	protein_coding	3.77959	3.89679	7.68796	8.0924	7.10922	7.98338
Up	ENSG00000122642	3.87731	0.013	FKBP9	7p14.3	protein_coding	3.78477	3.93275	7.82873	8.37509	6.72697	8.01346
Up	ENSG00000088340	3.87718	0.0598	FER1L4	20q11.22	transcribed_unitary_pseudogene	0.662996	0.946518	5.90416	4.76656	2.69566	5.36135
Up	ENSG00000137509	3.87167	0.029	PRCP	11q14.1	protein_coding	2.26019	2.50664	5.17741	7.61942	5.93199	6.29155
Up	ENSG00000167553	3.87029	0.00504	TUBA1C	12q13.12	protein_coding	3.9985	4.0063	7.4237	7.55245	8.3912	8.12341
Up	ENSG00000122641	3.86938	0.0665	INHBA	7p14.1	protein_coding	0.155032	0.0224488	4.27175	3.625	5.74072	2.195
Up	ENSG00000144655	3.86883	0.0689	CSRNP1	3p22.2	protein_coding	1.9615	3.34524	5.62231	6.94482	8.28672	5.23495
Up	ENSG00000144560	3.86705	0.00857	VGLL4	3p25.2	protein_coding	3.22422	2.92377	7.00817	6.80337	6.28247	7.67015
Up	ENSG00000284874	3.86442	0.0357		22q11.21	protein_coding	1.18333	0.925547	5.77541	4.22353	3.72086	5.95564
Up	ENSG00000152767	3.86415	0.0188	FARP1	13q32.2	protein_coding	1.56557	2.16391	6.79292	4.83401	5.63852	5.6501
Up	ENSG00000095397	3.86123	0.028	WHRN	9q32	protein_coding	0.430985	0.163701	4.61296	2.9677	5.26932	3.78433
Up	ENSG00000104415	3.86007	0.0179	CCN4	8q24.22	protein_coding	0.227157	0.0777147	4.02488	2.91351	4.90018	4.21146
Up	ENSG00000160991	3.85713	0.0307	ORAI2	7q22.1	protein_coding	0.951177	0.755805	5.72263	4.62354	3.29361	5.20269
Up	ENSG00000211455	3.85022	0.00799	STK38L	12p11.23	protein_coding	1.43848	1.38543	5.22605	4.4713	5.67446	5.67686
Up	ENSG00000165617	3.84656	0.014	DACT1	14q23.1	protein_coding	1.28293	1.45608	5.66081	5.99667	4.49203	4.71475
Up	ENSG00000092096	3.84506	0.0324	SLC22A17	14q11.2	protein_coding	1.83813	1.99643	6.68025	6.57877	4.4499	5.34042
Up	ENSG00000082497	3.84262	0.0434	SERTAD4	1q32.2	protein_coding	0.281678	0.102139	3.06922	4.79438	2.94655	5.32795
Up	ENSG00000186654	3.8425	0.0134	PRR5	22q13.31	protein_coding	0.864143	1.26548	5.89135	4.66544	4.80013	4.27236
Up	ENSG00000056998	3.8396	0.0751	GYG2	Xp22.33	protein_coding	0.489033	0	5.07259	5.32595	1.9802	3.95771
Up	ENSG00000115419	3.83879	0.0161	GLS	2q32.2	protein_coding	2.83807	2.47191	6.4827	7.54345	6.19553	5.75342
Up	ENSG00000129195	3.83358	0.0178	PIMREG	17p13.2	protein_coding	0	0	4.68189	3.4643	2.87402	4.31411
Up	ENSG00000111674	3.83057	0.0643	ENO2	12p13.31	protein_coding	2.31547	1.27252	6.99335	4.74215	4.18059	6.58218
Up	ENSG00000186998	3.81873	0.0766	EMID1	22q12.2	protein_coding	1.13444	0.59691	6.38642	5.51708	3.10965	3.7245
Up	ENSG00000117308	3.81787	0.0631	GALE	1p36.11	protein_coding	1.86613	1.92415	5.59213	5.90047	3.94901	7.41043
Up	ENSG00000169299	3.81764	0.0181	PGM2	4p14	protein_coding	0.492577	0.930932	4.69649	5.5901	3.87802	3.95297
Up	ENSG00000169604	3.81732	0.0229	ANTXR1	2p13.3	protein_coding	2.10791	1.99797	6.57124	6.23257	6.13896	4.53829
Up	ENSG00000166250	3.81409	0.0214	CLMP	11q24.1	protein_coding	1.63337	1.63689	5.94798	6.40974	4.93077	4.50839
Up	ENSG00000186866	3.81368	0.0215	POFUT2	21q22.3	protein_coding	3.96884	2.38343	6.92056	7.27861	6.18411	7.57599
Up	ENSG00000114923	3.80923	0.0858	SLC4A3	2q35	protein_coding	0.720109	0.419088	4.23104	3.50524	3.08962	6.68942
Up	ENSG00000244306	3.80537	0.0357	DUXAP10	14q11.2	transcribed_processed_pseudogene	1.89742	1.20253	5.92297	5.84068	3.75855	5.89919
Up	ENSG00000079931	3.80467	0.0354	MOXD1	6q23.2	protein_coding	0.320289	0.630891	4.67257	5.57314	3.04414	3.83119
Up	ENSG00000164761	3.80398	0.0266	TNFRSF11B	8q24.12	protein_coding	0.182363	0.0596072	4.08544	5.21461	3.03368	3.36613
Up	ENSG00000183856	3.80058	0.0286	IQGAP3	1q22	protein_coding	0	0.045134	4.70236	2.87869	3.03753	4.67399
Up	ENSG00000135916	3.79706	0.0359	ITM2C	2q37.1	protein_coding	3.39991	3.72898	7.51417	8.56126	5.9078	7.46277
Up	ENSG00000198121	3.79634	0.0242	LPAR1	9q31.3	protein_coding	0.727771	1.2381	4.57536	5.95924	4.80819	3.77431
Up	ENSG00000065308	3.79129	0.0102	TRAM2 ENSG00000065308	6p12.2	protein_coding	1.11395	1.41752	5.17017	5.51503	4.16782	5.37508
Up	ENSG00000162733	3.78984	0.0372	DDR2	1q23.3	protein_coding	1.20111	0.856395	4.1505	6.47191	4.21554	4.43643
Up	ENSG00000152127	3.78926	0.00719	MGAT5	2q21.2	protein_coding	0.838476	0.835807	4.38046	4.92882	4.01274	5.18358
Up	ENSG00000170312	3.78705	0.0411	CDK1	10q21.2	protein_coding	0.535928	0.0926553	4.19016	4.82614	2.44855	4.94054
Up	ENSG00000186469	3.78305	0.0282	GNG2	14q22.1	protein_coding	1.23805	0.831932	5.06218	6.04357	3.76331	4.40311
Up	ENSG00000108106	3.7766	0.0435	UBE2S	19q13.42	protein_coding	3.2841	3.77609	7.45342	6.99324	5.97883	8.80129
Up	ENSG00000135185	3.77564	0.017	TMEM243	7q21.12	protein_coding	1.2354	1.3837	4.87706	5.79949	4.0694	5.59478
Up	ENSG00000095380	3.77519	0.00527	NANS	9q22.33	protein_coding	2.58886	2.62741	5.88039	6.11082	6.76059	6.7815
Up	ENSG00000154175	3.77479	0.0793	ABI3BP	3q12.2	protein_coding	2.97201	1.6659	6.9389	6.4362	7.05081	3.94907
Up	ENSG00000184445	3.77332	0.0568	KNTC1	12q24.31	protein_coding	1.37613	0.59517	4.72819	3.4235	4.3696	6.5146
Up	ENSG00000134057	3.77069	0.0257	CCNB1	5q13.2	protein_coding	0.68265	1.27365	5.09847	4.47656	3.63879	5.78152
Up	ENSG00000151135	3.76851	0.0196	TMEM263	12q23.3	protein_coding	2.38057	2.56417	5.39666	6.73505	5.68877	7.14302
Up	ENSG00000044524	3.76681	0.064	EPHA3	3p11.1	protein_coding	0.485836	0.354783	4.45463	5.88485	2.47442	3.93457
Up	ENSG00000164574	3.76593	0.00908	GALNT10	5q33.2	protein_coding	1.20862	1.89006	5.51496	5.94909	4.8803	4.91672
Up	ENSG00000239264	3.76585	0.00724	TXNDC5	6p24.3	protein_coding	2.7944	3.63119	6.66196	7.34873	7.30052	6.60335
Up	ENSG00000160255	3.76332	0.00139	ITGB2	21q22.3	protein_coding	1.16045	1.38305	5.19444	4.74733	5.11263	5.0859
Up	ENSG00000130066	3.76154	0.0735	SAT1	Xp22.11	protein_coding	5.28548	4.59384	7.19632	9.52479	10.319	7.76466
Up	ENSG00000162745	3.76074	0.0757	OLFML2B	1q23.3	protein_coding	1.53787	1.61584	6.61494	3.31869	6.36254	5.05421
Up	ENSG00000155893	3.75714	0.0356	PXYLP1	3q23	protein_coding	1.27725	0.979561	6.04785	5.54041	4.15572	3.79822
Up	ENSG00000160209	3.75235	0.0273	PDXK	21q22.3	protein_coding	2.89984	2.88242	7.06804	5.36194	6.52352	7.62043
Up	ENSG00000124491	3.75019	0.0134	F13A1	6p25.1	protein_coding	1.11369	2.05626	5.59988	5.45022	5.79551	4.49507
Up	ENSG00000188501	3.74835	0.0966	LCTL	15q22.31	protein_coding	0.191566	0.0919801	5.00872	4.09483	1.46136	4.99558
Up	ENSG00000172986	3.74816	0.0191	GXYLT2	3p13	protein_coding	0.115985	0.201201	4.72777	4.04135	4.08949	2.76839
Up	ENSG00000109107	3.74492	0.0751	ALDOC	17q11.2	protein_coding	1.76534	1.20386	5.82001	6.08777	3.01426	5.99601
Up	ENSG00000099849	3.74473	0.0873	RASSF7	11p15.5	protein_coding	0.994147	0.07396	5.21398	4.01397	2.19769	5.68951
Up	ENSG00000173276	3.73849	0.0163	ZBTB21	21q22.3	protein_coding	0.472589	0.364523	3.9707	5.00803	4.4317	3.21776
Up	ENSG00000203819	3.73846	0.035	NA	NANA	NA	0.963457	0	4.4859	5.00451	2.76392	4.62642
Up	ENSG00000164300	3.73663	0.0847	SERINC5	5q14.1	protein_coding	0.633785	1.32946	3.78688	6.514	3.11589	5.45623
Up	ENSG00000006453	3.72655	0.036	BAIAP2L1	7q22.1	protein_coding	1.36901	0.957718	4.07451	5.32048	3.96247	6.20219
Up	ENSG00000186185	3.71267	0.0256	KIF18B	17q21.31	protein_coding	0.032067	0.0327441	4.27644	3.54117	2.53165	4.63106
Up	ENSG00000049449	3.71058	0.0189	RCN1	11p13	protein_coding	3.45223	3.64993	6.9736	8.36762	7.24315	6.46227
Up	ENSG00000106367	3.70556	0.0141	AP1S1 ENSG00000106367	7q22.1	protein_coding	2.30719	1.67078	6.14204	5.28858	4.99897	6.34859
Up	ENSG00000134308	3.70364	0.00369	YWHAQ	2p25.1	protein_coding	4.44774	4.04558	7.5235	7.949	8.00578	8.32294
Up	ENSG00000132481	3.70196	0.0108	TRIM47	17q25.1	protein_coding	3.39903	3.13533	7.18692	6.09186	7.08021	7.51759
Up	ENSG00000134802	3.69847	0.0118	SLC43A3	11q12.1	protein_coding	2.86079	3.03748	6.28965	7.30197	5.93452	7.06428
Up	ENSG00000136542	3.69841	0.0391	GALNT5	2q24.1	protein_coding	0.0199509	0	4.1094	5.10123	2.77899	2.84392
Up	ENSG00000140332	3.69454	0.00601	TLE3	15q23	protein_coding	1.56688	2.38057	5.77036	5.54311	5.27938	6.0802
Up	ENSG00000137193	3.6893	0.0237	PIM1	6p21.2	protein_coding	2.14512	2.02356	4.96905	6.17788	6.83488	5.11276
Up	ENSG00000260549	3.68893	0.0119	MT1L	16q13	transcribed_unprocessed_pseudogene	1.93298	1.02489	4.54758	5.83968	5.0947	5.1895
Up	ENSG00000156970	3.68836	0.0306	BUB1B	15q15.1	protein_coding	0	0	4.13826	2.86287	2.86665	4.88568
Up	ENSG00000103253	3.6861	0.0446	HAGHL	16p13.3	protein_coding	0.825608	0.945911	5.46441	4.03811	3.17295	5.61195
Up	ENSG00000179241	3.68348	0.0786	LDLRAD3	11p13	protein_coding	0.526889	1.2679	4.47108	6.69827	3.54054	3.6136
Up	ENSG00000119408	3.68107	0.00682	NEK6	9q33.3	protein_coding	0.719848	1.76135	5.25319	4.97961	4.79686	4.657
Up	ENSG00000070756	3.68026	0.0175	PABPC1	8q22.3	protein_coding	5.48447	5.98997	8.57134	9.23564	9.48895	10.374
Up	ENSG00000117724	3.67873	0.0338	CENPF	1q41	protein_coding	0.0350875	0.155358	4.22111	2.94799	2.89864	5.02808
Up	ENSG00000184347	3.67844	0.00907	SLIT3	5q35.1	protein_coding	1.34275	1.57865	5.34663	4.55335	5.81867	4.83793
Up	ENSG00000176142	3.67804	0.0172	TMEM39A	3q13.33	protein_coding	2.08727	2.16781	5.37313	6.56977	4.9524	6.32703
Up	ENSG00000184117	3.67767	0.00216	NIPSNAP1	22q12.2	protein_coding	1.71494	1.93082	5.64549	5.12123	5.57533	5.66016
Up	ENSG00000175130	3.67613	0.00969	MARCKSL1	1p35.1	protein_coding	1.91362	1.99887	4.77226	5.7619	5.97187	6.02345
Up	ENSG00000114993	3.67314	0.0164	RTKN	2p13.1	protein_coding	3.0789	3.25475	7.42034	6.35814	6.05507	7.52628
Up	ENSG00000163584	3.67188	0.0468	RPL22L1	3q26.2	protein_coding	2.84312	3.0695	4.91366	6.77747	7.62908	7.19257
Up	ENSG00000150712	3.67187	0.0429	MTMR12	5p13.3	protein_coding	1.65937	1.7339	5.55037	6.71136	3.916	5.29632
Up	ENSG00000138119	3.66918	0.0354	MYOF	10q23.33	protein_coding	1.24849	1.69179	5.7072	4.79901	6.20342	3.84767
Up	ENSG00000239617	3.66866	0.00239	RPL32P27	12q13.12	processed_pseudogene	0	0	3.57207	3.38176	3.66857	4.05222
Up	ENSG00000162772	3.66627	0.0324	ATF3	1q32.3	protein_coding	2.55948	2.25858	5.01525	5.4955	6.54094	7.24952
Up	ENSG00000129534	3.66559	0.0128	MIS18BP1	14q21.2	protein_coding	0.772063	0.716872	5.11516	4.79385	4.07713	3.65407
Up	ENSG00000072110	3.66412	0.00561	ACTN1	14q24.1	protein_coding	3.33513	3.44487	7.60535	6.5187	7.16127	6.93115
Up	ENSG00000223639	3.6633	0.015	CLIC1	CHR_HSCHR6_MHC_SSTO_CTG1	protein_coding	4.10116	3.76586	7.79817	6.63356	8.30723	7.6483
Up	ENSG00000198856	3.65819	0.0199	OSTC	4q25	protein_coding	3.05885	3.41631	5.78273	7.68354	7.14413	6.97267
Up	ENSG00000011052	3.65621	0.0336	NME1-NME2 ENSG00000011052	17q21.33	protein_coding	0	1.25569	4.43173	3.96767	3.30897	5.42787
Up	ENSG00000221955	3.65398	0.056	SLC12A8	3q21.2	protein_coding	0.470835	1.10735	3.71889	3.6275	6.29552	4.13039
Up	ENSG00000214756	3.65378	0.012	CSKMT	11q12.3	protein_coding	2.59341	1.19582	5.942	5.22999	5.47238	5.5492
Up	ENSG00000130309	3.65357	0.0109	COLGALT1	19p13.11	protein_coding	3.34643	3.40552	6.97092	6.64731	6.58101	7.91894
Up	ENSG00000183255	3.64976	0.00323	PTTG1IP ENSG00000183255	21q22.3	protein_coding	4.51709	4.24948	7.89955	8.19866	7.65857	8.37542
Up	ENSG00000110881	3.64763	0.0293	ASIC1	12q13.12	protein_coding	0.189024	0.239521	4.88502	4.18623	2.57182	3.80453
Up	ENSG00000167578	3.6391	0.0652	RAB4B	19q13.2	protein_coding	3.08614	3.0906	8.27325	6.20306	5.10731	7.32628
Up	ENSG00000250796	3.63908	0.0841		3q21.3	processed_pseudogene	0	0	3.86731	3.02717	5.63438	2.02747
Up	ENSG00000274636	3.6377	0.0248	GLIS2	CHR_HSCHR16_3_CTG1	protein_coding	0.548777	0.659508	4.59935	2.94616	4.98713	4.43474
Up	ENSG00000205212	3.63588	0.0443	CCDC144NL	17p11.2	transcribed_unprocessed_pseudogene	0.0456596	0	4.37006	4.42976	1.97131	3.86369
Up	ENSG00000111012	3.63032	0.0509	CYP27B1	12q14.1	protein_coding	0.420414	0.113234	2.85178	3.2964	3.81505	5.62536
Up	ENSG00000140682	3.63001	0.0268	TGFB1I1	16p11.2	protein_coding	2.98757	2.10686	7.33633	5.65474	5.43921	6.2786
Up	ENSG00000272196	3.62817	0.0608	H2AC19	1q21.2	protein_coding	3.96271	2.82701	5.81173	8.61551	6.3094	7.35546
Up	ENSG00000151789	3.62755	0.0378	ZNF385D	3p24.3	protein_coding	0.499922	1.2009	3.76213	6.01614	4.08648	4.04709
Up	ENSG00000143228	3.62667	0.0132	NUF2	1q23.3	protein_coding	0	0	3.93064	2.74996	3.52742	4.29867
Up	ENSG00000100162	3.62525	0.0289	CENPM	22q13.2	protein_coding	0.345416	0.927597	4.47231	3.18328	3.9907	5.40075
Up	ENSG00000018408	3.62413	0.0509	WWTR1	3q25.1	protein_coding	1.9749	2.5694	5.87214	7.44583	5.74022	4.52694
Up	ENSG00000143924	3.61649	0.00164	EML4	2p21	protein_coding	1.09345	0.719499	4.37908	4.66849	4.37899	4.6653
Up	ENSG00000091136	3.61495	0.0465	LAMB1	7q31.1	protein_coding	3.04909	3.16127	6.55836	5.18356	7.17722	7.96137
Up	ENSG00000276504	3.61421	0.0666	TFPT	CHR_HSCHR19_4_CTG3_1	protein_coding	3.10429	0	5.72977	4.64409	4.783	5.50855
Up	ENSG00000141985	3.61418	0.0138	SH3GL1	19p13.3	protein_coding	3.12239	2.67126	7.25092	5.68012	6.4428	6.67019
Up	ENSG00000198901	3.6097	0.0311	PRC1	15q26.1	protein_coding	1.00326	2.00364	5.15714	4.95973	4.0803	6.25544
Up	ENSG00000166147	3.6093	0.0604	FBN1	15q21.1	protein_coding	3.11466	3.45531	7.16165	5.35578	8.50128	6.55845
Up	ENSG00000139514	3.60858	0.00644	SLC7A1	13q12.3	protein_coding	0.46836	0.401991	3.39454	4.0657	4.52782	4.18694
Up	ENSG00000187479	3.60846	0.0665	C11orf96	11p11.2	protein_coding	4.20279	4.42325	7.56189	7.52077	9.8879	6.71537
Up	ENSG00000256673	3.60776	0.0909		12p13.31	unprocessed_pseudogene	0	0	2.46857	2.15928	4.33602	5.46719
Up	ENSG00000130522	3.60652	0.0145	JUND	19p13.11	protein_coding	5.88267	5.34441	10.0462	8.8391	9.42509	8.56987
Up	ENSG00000276043	3.60448	0.0437	UHRF1	19p13.3	protein_coding	0.896225	0.249948	4.83646	3.64264	2.90604	5.32514
Up	ENSG00000159335	3.60381	0.045	PTMS ENSG00000159335	12p13.31	protein_coding	6.08667	5.64835	10.7989	8.48607	8.55984	10.0405
Up	ENSG00000003137	3.60332	0.0193	CYP26B1	2p13.2	protein_coding	1.70944	0.689514	4.42637	4.26065	4.76007	5.76407
Up	ENSG00000168268	3.59911	0.0195	NT5DC2	3p21.1	protein_coding	3.71702	3.15443	7.94786	6.39384	6.42462	7.37303
Up	ENSG00000052126	3.59711	0.00488	PLEKHA5	12p12.3	protein_coding	0.848996	0.584401	4.81591	4.35569	3.84697	4.23665
Up	ENSG00000125968	3.58928	0.0768	ID1	20q11.21	protein_coding	4.85645	2.70599	7.60193	7.78106	5.71347	8.38556
Up	ENSG00000011426	3.58582	0.00419	ANLN	7p14.2	protein_coding	0.330058	0.0698341	3.68076	3.60163	3.53872	4.32196
Up	ENSG00000148773	3.58477	0.046	MKI67	10q26.2	protein_coding	0	0.0117461	4.75342	2.83432	2.38135	4.39348
Up	ENSG00000046604	3.58296	0.0356	DSG2	18q12.1	protein_coding	0.262451	0.184999	3.8762	5.22963	2.8917	3.22919
Up	ENSG00000196369	3.5805	0.0164	SRGAP2B	1q21.1	protein_coding	0.706198	0.447666	4.65028	4.48805	3.0903	4.40111
Up	ENSG00000127528	3.57982	0.0248	KLF2	19p13.11	protein_coding	4.87837	4.50034	7.56964	8.37954	7.67647	9.45105
Up	ENSG00000177732	3.578	0.0795	SOX12	20p13	protein_coding	0.610352	1.522	5.62848	4.34614	2.75827	5.84381
Up	ENSG00000128422	3.57625	0.0456	KRT17	17q21.2	protein_coding	0	0	4.03304	4.89376	2.21647	3.16173
Up	ENSG00000142694	3.57565	0.0243	EVA1B	1p34.3	protein_coding	3.72889	2.97521	8.11722	6.43002	6.80254	6.361
Up	ENSG00000134910	3.57479	0.0417	STT3A ENSG00000134910	11q24.2	protein_coding	3.62428	3.56775	6.75785	8.066	5.79616	8.06319
Up	ENSG00000167747	3.57478	0.0195	C19orf48	19q13.33	transcribed_unitary_pseudogene	2.62893	2.45505	6.62801	5.74634	5.1973	6.89542
Up	ENSG00000114405	3.57474	0.0376	C3orf14 ENSG00000114405	3p14.2	protein_coding	0.628193	0.481997	2.64234	4.26565	4.49347	5.11788
Up	ENSG00000088826	3.57208	0.0749	SMOX	20p13	protein_coding	1.47474	1.8553	5.44066	5.03531	6.96016	3.51226
Up	ENSG00000156011	3.56989	0.0472	PSD3	8p22	protein_coding	0.323763	0.152803	4.10325	5.31222	3.14654	2.67069
Up	ENSG00000151725	3.56954	0.0152	CENPU	4q35.1	protein_coding	0.373428	0.247593	4.5961	3.56825	3.05916	4.2967
Up	ENSG00000115363	3.56693	0.0105	EVA1A	2p12	protein_coding	1.15365	0.260872	4.53373	4.13525	3.69149	4.73628
Up	ENSG00000111424	3.5662	0.0211	VDR	12q13.11	protein_coding	0.325546	0.437772	4.07858	2.8922	3.94539	4.87527
Up	ENSG00000177096	3.56317	0.0288	PHETA2	22q13.2	protein_coding	1.22562	1.47748	5.30126	5.22737	3.53638	5.59387
Up	ENSG00000213626	3.56312	0.00799	LBH	2p23.1	protein_coding	3.42133	2.46102	6.30415	6.81391	6.12671	6.7724
Up	ENSG00000184009	3.56222	0.00471	ACTG1	17q25.3	protein_coding	7.43434	7.18473	11.0964	11.2254	10.8167	10.3485
Up	ENSG00000082397	3.55769	0.0145	EPB41L3	18p11.31	protein_coding	1.88391	1.58489	4.77882	4.66929	6.02988	5.69036
Up	ENSG00000172071	3.55409	0.0125	EIF2AK3	2p11.2	protein_coding	0.61879	1.61931	3.99854	5.07274	4.98433	4.63697
Up	ENSG00000196924	3.54957	0.054	FLNA	Xq28	protein_coding	6.35576	5.09137	9.64421	7.77826	9.24638	10.4237
Up	ENSG00000179051	3.54794	0.0237	RCC2	1p36.13	protein_coding	1.95194	2.20419	5.07309	4.93106	5.7043	6.79555
Up	ENSG00000050165	3.54589	0.0507	DKK3	11p15.3	protein_coding	2.65434	2.47569	7.31266	5.83249	6.72089	4.5776
Up	ENSG00000136295	3.54391	0.0221	TTYH3	7p22.3	protein_coding	1.64744	1.20609	5.80089	3.86565	5.06676	5.14939
Up	ENSG00000100316	3.53625	0.00283	RPL3	22q13.1	protein_coding	7.58491	7.16213	10.5573	10.9822	11.095	11.0046
Up	ENSG00000267681	3.53612	0.0365	ENSG00000267681	17q21.31	transcribed_processed_pseudogene	0	0	4.76858	2.62812	2.74013	4.00764
Up	ENSG00000125845	3.53392	0.017	BMP2	20p12.3	protein_coding	0.452476	0.747533	4.223	4.90043	4.25224	3.16003
Up	ENSG00000142046	3.53068	0.0343	TMEM91	19q13.2	protein_coding	1.76237	0.869125	6.23462	4.25447	4.49289	4.40374
Up	ENSG00000139626	3.53022	0.0344	ITGB7	12q13.13	protein_coding	0.558526	0.545732	3.32068	3.78161	3.67215	5.55494
Up	ENSG00000012171	3.52801	0.0181	SEMA3B	3p21.31	protein_coding	3.24404	2.76827	6.62135	6.54003	5.60085	7.37441
Up	ENSG00000100219	3.52709	0.0548	XBP1	22q12.1	protein_coding	3.30162	4.37023	5.67014	7.68984	8.11794	7.97413
Up	ENSG00000163931	3.52584	0.0176	TKT	3p21.1	protein_coding	2.85919	3.66897	6.81784	5.96589	6.78242	7.59356
Up	ENSG00000188706	3.52245	0.00489	ZDHHC9	Xq26.1	protein_coding	1.45753	2.23186	5.47431	5.58878	5.01137	5.39409
Up	ENSG00000140743	3.52043	0.00756	CDR2	16p12.2	protein_coding	1.73785	1.41541	4.47878	5.03162	5.24613	5.6317
Up	ENSG00000162944	3.52005	0.0665	RFTN2	2q33.1	protein_coding	0.571757	0.423932	3.38908	5.34084	2.45181	4.88983
Up	ENSG00000166292	3.51864	0.0689	TMEM100	17q22	protein_coding	0.800948	2.76077	3.98119	5.48983	5.08831	6.63866
Up	ENSG00000170004	3.51725	0.0199	CHD3	17p13.1	protein_coding	3.19834	2.4017	6.98551	5.47996	5.98242	6.8212
Up	ENSG00000153815	3.51719	0.0902	CMIP	16q23.2	protein_coding	1.7286	1.81869	6.55826	4.27142	6.6279	3.70577
Up	ENSG00000166813	3.51616	0.0248	KIF7	15q26.1	protein_coding	0.851526	0.350874	5.3121	3.45325	3.62584	4.07823
Up	ENSG00000126603	3.50857	0.0456	GLIS2	16p13.3	protein_coding	1.1091	0	4.36445	2.56101	4.92217	4.40484
Up	ENSG00000153395	3.50764	0.0743	LPCAT1	5p15.33	protein_coding	2.08024	1.55226	5.65923	3.73418	4.88339	7.01877
Up	ENSG00000196118	3.50421	0.0384	CCDC189	16p11.2	protein_coding	0.0621231	0	4.63165	3.52221	2.13406	3.8532
Up	ENSG00000119632	3.50382	0.0597	IFI27L2	14q32.12	protein_coding	2.97006	2.58873	7.2406	6.96868	6.46532	4.45825
Up	ENSG00000146670	3.50284	0.0557	CDCA5	11q13.1	protein_coding	0.27608	0.911799	4.4761	3.80427	2.62897	5.47779
Up	ENSG00000160211	3.50158	0.00566	G6PD	Xq28	protein_coding	1.46048	1.03025	4.96096	4.28705	4.56701	5.17275
Up	ENSG00000109113	3.49824	0.00108	RAB34	17q11.2	protein_coding	3.18564	3.16675	6.74516	6.46391	6.69811	6.79055
Up	ENSG00000205710	3.49571	0.0681	C17orf107	17p13.2	protein_coding	0.290573	0	4.62178	4.83395	2.00646	3.10178
Up	ENSG00000281484	3.48849	0.0394	BTG3	CHR_HSCHR21_6_CTG1_1	protein_coding	0	0.671416	3.67989	5.05589	3.97176	2.58925
Up	ENSG00000128791	3.48623	0.0185	TWSG1	18p11.22	protein_coding	1.63002	1.21663	3.86347	5.52148	4.98942	5.26385
Up	ENSG00000173846	3.48512	0.036	PLK3	1p34.1	protein_coding	1.84379	1.93468	5.47019	4.36984	6.72818	4.92923
Up	ENSG00000135506	3.48388	0.00846	OS9	12q13.3	protein_coding	5.06367	5.07335	8.54774	8.62239	7.88812	9.15133
Up	ENSG00000113583	3.48166	0.0286	C5orf15	5q31.1	protein_coding	3.05972	3.14342	5.95554	7.8821	5.93998	6.55529
Up	ENSG00000144747	3.47808	0.0156	TMF1	3p14.1	protein_coding	1.35488	1.62541	5.50357	5.58379	4.23285	4.55271
Up	ENSG00000105011	3.47767	0.0507	ASF1B	19p13.12	protein_coding	0	0	4.66823	3.55094	1.87644	3.81507
Up	ENSG00000136240	3.47475	0.0257	KDELR2	7p22.1	protein_coding	3.37499	4.57626	6.85096	7.07661	7.40695	8.46698
Up	ENSG00000175264	3.47454	0.0291	CHST1	11p11.2	protein_coding	1.12376	0.941362	5.65264	4.15466	3.49434	4.72675
Up	ENSG00000115129	3.47178	0.0145	TP53I3	2p23.3	protein_coding	1.57004	1.16372	5.24182	3.88055	5.06762	5.16465
Up	ENSG00000225210	3.46938	0.0409	DUXAP9	14q11.2	transcribed_processed_pseudogene	1.23559	1.61705	5.53196	5.37974	3.32524	5.34588
Up	ENSG00000178401	3.46733	0.0889	DNAJC22	12q13.12	protein_coding	0.0327652	0.000389475	5.46971	3.31049	1.84926	3.30618
Up	ENSG00000061656	3.46532	0.0266	SPAG4	20q11.22	protein_coding	0.575843	2.05346	5.13883	4.09032	4.41723	5.47352
Up	ENSG00000139194	3.46278	0.0099	RBP5	12p13.31	protein_coding	1.16892	0.407135	4.66459	3.59711	4.36526	4.37628
Up	ENSG00000092445	3.46247	0.0311	TYRO3 ENSG00000092445	15q15.1	protein_coding	1.00874	1.04175	5.34784	3.53831	3.82206	5.24266
Up	ENSG00000100979	3.4619	0.083	PLTP	20q13.12	protein_coding	2.93568	3.67383	5.97509	5.19307	8.16299	7.73547
Up	ENSG00000104881	3.46082	0.0643	PPP1R13L	19q13.32	protein_coding	2.63938	1.88825	6.67483	4.08382	5.39567	6.74421
Up	ENSG00000058262	3.45949	0.0157	SEC61A1	3q21.3	protein_coding	3.99038	4.53222	7.2163	7.55115	7.44138	8.67434
Up	ENSG00000179222	3.45622	0.00536	MAGED1	Xp11.22	protein_coding	4.66979	4.27811	7.92104	8.38681	7.45195	7.96088
Up	ENSG00000166002	3.45616	0.02	SMCO4	11q21	protein_coding	2.1868	2.74067	6.14489	5.44711	5.23237	6.85522
Up	ENSG00000105427	3.45611	0.0756	CNFN	19q13.2	protein_coding	0.364496	0	2.9242	2.87156	3.05769	5.69997
Up	ENSG00000143797	3.45409	0.0951	MBOAT2	2p25.1	protein_coding	0.840243	0.621623	2.27763	3.75256	4.88435	5.82555
Up	ENSG00000126562	3.45284	0.0464	WNK4	17q21.2	protein_coding	0.114376	0.035455	3.89421	4.00027	1.87416	4.34238
Up	ENSG00000213983	3.45091	0.0168	AP1G2	14q11.2	protein_coding	3.17354	2.9313	7.34657	6.62622	5.65358	6.38694
Up	ENSG00000130429	3.45038	0.0262	ARPC1B	7q22.1	protein_coding	4.16314	4.10814	7.63273	6.4392	7.72671	8.54545
Up	ENSG00000157800	3.44751	0.00969	SLC37A3	7q34	protein_coding	2.49552	1.53434	5.27647	5.10437	5.97512	5.49379
Up	ENSG00000179528	3.44685	0.0512	LBX2	2p13.1	protein_coding	0.561345	0.293152	4.66993	3.56178	2.37191	4.89276
Up	ENSG00000276180	3.4452	0.0564	H4C9	6p22.1	protein_coding	0.629149	0.427857	3.79039	5.64513	2.76286	3.69644
Up	ENSG00000078596	3.44438	0.048	ITM2A	Xq21.1	protein_coding	3.84107	3.84206	6.77008	8.98427	6.71148	6.67795
Up	ENSG00000197283	3.44362	0.0275	SYNGAP1	6p21.32	protein_coding	2.39165	0.95458	5.39826	4.91355	4.30585	5.84929
Up	ENSG00000012660	3.44212	0.0443	ELOVL5	6p12.1	protein_coding	2.14564	1.55562	4.4365	4.63413	6.78127	5.3191
Up	ENSG00000121578	3.43215	0.00139	B4GALT4	3q13.32	protein_coding	1.77777	1.72981	5.23344	5.41348	5.10133	4.9955
Up	ENSG00000110328	3.43001	0.0854	GALNT18	11p15.4	protein_coding	1.76757	1.9785	6.38132	6.62234	3.60124	4.60726
Up	ENSG00000168487	3.42813	0.0245	BMP1	8p21.3	protein_coding	3.24238	2.77619	7.3785	5.43575	6.69331	6.24211
Up	ENSG00000187595	3.42687	0.0953	ZNF385C	17q21.2	protein_coding	1.96953	1.96733	5.83512	4.79216	3.69358	7.26036
Up	ENSG00000146243	3.42604	0.0786	IRAK1BP1	6q14.1	protein_coding	0.5509	0.110152	4.25849	5.33627	2.06776	3.36373
Up	ENSG00000165655	3.4258	0.0488	ZNF503	10q22.2	protein_coding	1.6316	0.888945	3.9643	4.49778	6.28342	3.99878
Up	ENSG00000117139	3.42404	0.0119	KDM5B	1q32.1	protein_coding	1.26572	1.27138	5.09277	5.18896	4.60116	3.88747
Up	ENSG00000228454	3.42365	0.0518	C4B	CHR_HSCHR6_MHC_SSTO_CTG1	protein_coding	0.880017	1.6533	4.6313	3.22115	5.00253	5.90628
Up	ENSG00000153823	3.4225	0.0598	PID1	2q36.3	protein_coding	1.52731	1.95414	5.80067	6.44235	3.64136	4.7685
Up	ENSG00000116641	3.42012	0.00348	DOCK7	1p31.3	protein_coding	1.27238	1.83268	4.68859	5.10307	5.17887	4.92009
Up	ENSG00000188486	3.41892	0.00533	H2AX	11q23.3	protein_coding	3.38782	3.50555	6.99228	6.9865	6.27838	7.20525
Up	ENSG00000174442	3.41873	0.0361	ZWILCH	15q22.31	protein_coding	0.932915	0.655261	5.4698	4.27237	3.0708	4.03832
Up	ENSG00000168938	3.41845	0.022	PPIC	5q23.2	protein_coding	3.7921	3.8699	7.41553	8.13234	7.23905	6.21087
Up	ENSG00000136811	3.41787	0.0215	ODF2	9q34.11	protein_coding	2.113	1.91772	6.44931	5.51488	4.57322	5.19549
Up	ENSG00000134369	3.41715	0.012	NAV1	1q32.1	protein_coding	1.36263	1.06709	5.30218	3.87353	4.67708	4.67526
Up	ENSG00000134222	3.41516	0.0443	PSRC1	1p13.3	protein_coding	0.166836	0.52895	4.96649	3.07229	2.67603	4.3374
Up	ENSG00000264343	3.41249	0.0625	NOTCH2NLA	1q21.1	protein_coding	1.1794	1.76142	5.52065	6.24381	4.29366	3.47346
Up	ENSG00000105245	3.40981	0.0281	NUMBL	19q13.2	protein_coding	3.40513	2.03086	6.62959	5.6067	5.47373	6.80121
Up	ENSG00000164647	3.40947	0.0226	STEAP1	7q21.13	protein_coding	0.298832	0.41661	3.03106	3.52875	4.90339	3.60555
Up	ENSG00000197702	3.40472	0.0166	PARVA	11p15.3	protein_coding	1.46556	1.40332	5.24499	5.3536	4.91742	3.84063
Up	ENSG00000177425	3.40432	0.0369	PAWR	12q21.2	protein_coding	2.2907	1.3512	4.45296	6.20898	4.43151	5.80763
Up	ENSG00000164953	3.40346	0.0185	TMEM67	8q22.1	protein_coding	0.850827	0.145003	4.78829	3.97383	3.2025	3.64086
Up	ENSG00000170017	3.39675	0.0223	ALCAM	3q13.11	protein_coding	0.370375	0.379111	3.04608	3.16818	4.67032	4.2014
Up	ENSG00000123219	3.39263	0.0191	CENPK	5q12.3	protein_coding	0.207519	0	3.69905	3.48728	2.51786	4.28139
Up	ENSG00000161638	3.38949	0.0608	ITGA5	12q13.13	protein_coding	2.98874	3.39494	6.30518	5.0719	7.99972	6.9485
Up	ENSG00000187210	3.38911	0.0469	GCNT1	9q21.13	protein_coding	0.211285	0.0972953	3.8633	4.86224	2.24178	3.20627
Up	ENSG00000113615	3.38856	0.00753	SEC24A	5q31.1	protein_coding	1.03226	0.824219	4.04642	4.81229	4.59907	3.80942
Up	ENSG00000177426	3.38689	0.0535	TGIF1	18p11.31	protein_coding	2.38292	3.93123	5.47939	7.04037	7.63639	6.01971
Up	ENSG00000168994	3.38153	0.0391	PXDC1 ENSG00000168994	6p25.2	protein_coding	2.71911	3.84783	5.635	6.97107	7.74363	6.31031
Up	ENSG00000135476	3.38129	0.0588	ESPL1	12q13.13	protein_coding	0.0378924	0.0670494	4.20592	2.50872	2.29581	4.7246
Up	ENSG00000186493	3.38036	0.0228	C5orf38 ENSG00000186493	5p15.33	lncRNA	0.380865	0.295569	2.61867	4.30926	4.30037	3.64601
Up	ENSG00000100596	3.37649	0.0199	SPTLC2	14q24.3	protein_coding	1.35999	1.16951	4.20285	5.06204	3.84613	5.45393
Up	ENSG00000118705	3.3736	0.0299	RPN2	20q11.23	protein_coding	4.62026	5.1187	7.35161	8.71866	7.67457	9.22749
Up	ENSG00000197380	3.36885	0.0443	DACT3	19q13.32	protein_coding	1.18195	0.835564	5.28878	3.85332	3.14477	5.22354
Up	ENSG00000111530	3.36806	0.0118	CAND1	12q14.3	protein_coding	2.12745	1.71814	4.52894	5.71173	5.22635	5.69643
Up	ENSG00000282416	3.36503	0.0801		19p13.3	processed_pseudogene	1.40125	0	5.39639	3.31866	2.70982	4.83777
Up	ENSG00000182195	3.36456	0.0588	LDOC1	Xq27.1	protein_coding	1.55991	1.58371	5.85272	6.10304	3.93446	3.85527
Up	ENSG00000184349	3.36406	0.038	EFNA5	5q21.3	protein_coding	0.532255	0.31757	4.08446	4.52591	2.32643	4.2191
Up	ENSG00000101412	3.36115	0.0419	E2F1	20q11.22	protein_coding	0.988566	0.569139	5.1732	3.61195	2.97382	4.80103
Up	ENSG00000097021	3.35954	0.00554	ACOT7	1p36.31	protein_coding	1.22973	1.12024	4.89294	4.05755	4.34297	4.84463
Up	ENSG00000131188	3.35938	0.045	PRR7	5q35.3	protein_coding	1.27365	0.606242	5.60519	4.00387	3.11693	4.4713
Up	ENSG00000205583	3.35817	0.0806	STAG3L1	7q11.23	transcribed_unprocessed_pseudogene	1.83268	2.21283	6.73078	5.22067	3.53602	6.03627
Up	ENSG00000144554	3.35806	0.0427	FANCD2	3p25.3	protein_coding	0.339493	0.0532003	3.48326	2.37832	3.44791	4.90812
Up	ENSG00000168234	3.35537	0.0946	TTC39C	18q11.2	protein_coding	0.884733	1.39298	4.43055	3.13211	3.86916	6.54509
Up	ENSG00000162433	3.35533	0.011	AK4	1p31.3	protein_coding	0.685236	0.937619	4.1659	4.72377	3.414	4.36336
Up	ENSG00000150687	3.35522	0.0313	PRSS23	11q14.2	protein_coding	3.35577	4.23493	7.98797	7.33425	7.29479	5.98527
Up	ENSG00000076928	3.35498	0.0222	ARHGEF1	19q13.2	protein_coding	4.33292	4.0399	8.28926	6.69254	7.09104	8.09273
Up	ENSG00000173852	3.35451	0.0118	DPY19L1	7p14.2	protein_coding	0.906027	0.870517	4.33545	4.50411	3.41186	4.71969
Up	ENSG00000172638	3.35193	0.0284	EFEMP2	11q13.1	protein_coding	4.8947	5.30403	9.28558	9.05724	7.49679	7.96559
Up	ENSG00000142798	3.35012	0.0191	HSPG2	1p36.12	protein_coding	5.7397	5.1666	9.32137	8.61836	7.90546	9.3679
Up	ENSG00000157890	3.34929	0.0858	MEGF11	15q22.31	protein_coding	0	0.0239011	5.06339	3.07205	1.64359	3.66593
Up	ENSG00000268975	3.34767	0.0321	MIA-RAB4B	19q13.2	protein_coding	0.383339	0	4.16335	3.63385	2.22819	4.13198
Up	ENSG00000170275	3.34554	0.0145	CRTAP	3p22.3	protein_coding	4.4863	5.42845	8.4713	8.72658	7.56172	8.45208
Up	ENSG00000165304	3.34186	0.0442	MELK	9p13.2	protein_coding	0.0673152	0	3.887	2.89578	2.16765	4.55164
Up	ENSG00000139182	3.34112	0.0197	CLSTN3	12p13.31	protein_coding	2.56781	2.1527	6.28916	4.67621	6.07845	5.76167
Up	ENSG00000166681	3.33895	0.0141	BEX3	Xq22.2	protein_coding	3.94342	3.37495	7.15095	7.70225	6.82692	6.31243
Up	ENSG00000272601	3.33513	0.0704		7q32.1	transcribed_unprocessed_pseudogene	0	0	5.17566	3.03464	2.13008	3.00012
Up	ENSG00000064547	3.33431	0.0542	LPAR2	19p13.11	protein_coding	0.82202	0.94199	4.70012	3.40256	3.15453	5.60805
Up	ENSG00000136868	3.33297	0.00339	SLC31A1	9q32	protein_coding	0.815999	0.885998	4.52177	4.28801	3.80744	4.11866
Up	ENSG00000269190	3.33268	0.0296	FBXO17	19q13.2	protein_coding	1.70741	1.39975	5.64082	4.65209	3.74546	5.50665
Up	ENSG00000171067	3.33116	0.015	C11orf24	11q13.2	protein_coding	3.33591	3.3348	7.2889	6.10631	6.11407	7.15675
Up	ENSG00000104312	3.32936	0.0599	RIPK2	8q21.3	protein_coding	0.788379	0.68686	3.04405	3.50614	5.79022	3.9275
Up	ENSG00000222009	3.32916	0.0234	BTBD19	1p34.1	protein_coding	1.82303	1.22107	5.77426	4.90047	4.8022	3.92792
Up	ENSG00000134954	3.32732	0.0115	ETS1	11q24.3	protein_coding	2.63172	2.30088	5.53305	5.97698	6.46465	5.1998
Up	ENSG00000157483	3.32567	0.0113	MYO1E	15q22.2	protein_coding	2.4349	2.69565	5.48617	6.46666	6.25479	5.35616
Up	ENSG00000113384	3.32517	0.0513	GOLPH3	5p13.3	protein_coding	2.96666	4.4947	7.85929	7.72108	5.85053	6.79252
Up	ENSG00000180776	3.32378	0.00908	ZDHHC20	13q12.11	protein_coding	1.39094	1.78287	5.38862	5.08518	4.91523	4.25374
Up	ENSG00000162849	3.32338	0.00724	KIF26B	1q44	protein_coding	0.0199396	0	3.59063	3.78209	2.75243	3.20825
Up	ENSG00000276701	3.32099	0.0206	MIF	CHR_HSCHR22_1_CTG7	protein_coding	6.1442	6.26557	10.0351	8.87569	8.89756	10.2951
Up	ENSG00000089597	3.31972	0.0311	GANAB	11q12.3	protein_coding	4.70632	4.71411	7.91419	8.73088	6.79935	8.67532
Up	ENSG00000079150	3.31791	0.00622	FKBP7	2q31.2	protein_coding	2.14545	2.03295	4.88187	5.75535	5.25034	5.74087
Up	ENSG00000138685	3.31663	0.0889	FGF2	4q28.1	protein_coding	0.483291	0.312906	3.89356	5.08714	4.15595	1.72226
Up	ENSG00000106785	3.31376	0.00706	TRIM14	9q22.33	protein_coding	0.258133	0.119909	3.76411	3.93958	3.36556	2.94189
Up	ENSG00000198108	3.31145	0.00753	CHSY3	5q23.3	protein_coding	0.214213	0.541171	3.98339	3.71304	3.05597	4.0042
Up	ENSG00000164199	3.31134	0.0463	ADGRV1	5q14.3	protein_coding	0.141756	0.36012	3.52985	2.90258	2.73827	5.07843
Up	ENSG00000167552	3.3099	0.0048	TUBA1A	12q13.12	protein_coding	4.05443	3.3573	6.87539	6.81057	7.04493	7.33217
Up	ENSG00000168078	3.30757	0.0227	PBK	8p21.1	protein_coding	0	0.068386	3.46327	3.30728	2.35277	4.24374
Up	ENSG00000167900	3.30575	0.0388	TK1	17q25.3	protein_coding	2.4876	2.27804	6.35279	5.3813	4.43781	6.58239
Up	ENSG00000214063	3.3038	0.0306	TSPAN4	11p15.5	protein_coding	4.09248	3.67969	7.79604	8.06836	6.29114	6.60401
Up	ENSG00000123485	3.30021	0.0393	HJURP	2q37.1	protein_coding	0.665222	0.161733	4.74248	3.34335	2.54652	4.22243
Up	ENSG00000163659	3.29954	0.0637	TIPARP	3q25.31	protein_coding	1.23649	2.32088	3.58414	5.87994	6.06544	4.78335
Up	ENSG00000069974	3.2981	0.00753	RAB27A	15q21.3	protein_coding	0.740044	0.667489	3.95217	3.87962	4.63448	3.54122
Up	ENSG00000258839	3.29695	0.0679	MC1R	16q24.3	protein_coding	0.93602	0.54023	3.97456	2.50084	4.1045	5.56041
Up	ENSG00000101577	3.29563	0.0063	LPIN2	18p11.31	protein_coding	0.554708	0.86127	3.78119	4.52579	3.60753	4.09999
Up	ENSG00000266028	3.29508	0.0351	SRGAP2	1q32.1	protein_coding	2.30752	2.40128	6.50175	6.16344	4.3668	5.56594
Up	ENSG00000105137	3.28751	0.0226	SYDE1	19p13.12	protein_coding	2.2015	2.11906	6.13768	5.20935	4.46671	5.97744
Up	ENSG00000188157	3.28657	0.0807	AGRN ENSG00000188157	1p36.33	protein_coding	2.28916	1.65444	5.22062	3.73705	5.09552	6.98031
Up	ENSG00000205795	3.28235	0.00465	CYS1	2p25.1	protein_coding	0.515386	0.36978	3.69687	3.3662	3.62959	4.20706
Up	ENSG00000039560	3.28124	0.0708	RAI14	5p13.2	protein_coding	0.424763	0.57065	3.31615	3.21382	5.67676	2.90908
Up	ENSG00000121957	3.27869	0.0914	GPSM2	1p13.3	protein_coding	1.51026	3.14732	5.46346	6.51905	3.87912	6.56831
Up	ENSG00000119969	3.27855	0.0141	HELLS	10q23.33	protein_coding	0.208031	0.0548971	3.50847	3.13941	2.78139	4.21079
Up	ENSG00000134250	3.27767	0.0123	NOTCH2	1p12	protein_coding	1.23744	0.969914	4.92477	3.9557	4.80868	3.83624
Up	ENSG00000168036	3.27764	0.00423	CTNNB1	3p22.1	protein_coding	4.77239	4.93259	7.70795	8.48237	8.06383	8.26638
Up	ENSG00000101294	3.27763	0.0106	HM13	20q11.21	protein_coding	4.36397	4.47531	7.57786	7.14403	7.63946	8.42775
Up	ENSG00000124766	3.27593	0.0324	SOX4	6p22.3	protein_coding	0.988917	0.852196	2.96604	4.55436	5.08785	4.17769
Up	ENSG00000151693	3.2756	0.0188	ASAP2	2p25.1	protein_coding	1.79679	0.8483	4.50274	3.89985	5.33803	4.65196
Up	ENSG00000107819	3.27374	0.0231	SFXN3	10q24.31	protein_coding	2.6261	1.69076	6.24596	4.85384	4.89897	5.72991
Up	ENSG00000013375	3.2731	0.0174	PGM3	6q14.1	protein_coding	2.5086	2.1684	6.54945	5.47795	5.44375	4.97524
Up	ENSG00000100092	3.27182	0.0228	SH3BP1	22q13.1	protein_coding	0.406127	0.578764	4.69423	3.08202	3.196	4.08482
Up	ENSG00000008283	3.27166	0.0118	CYB561	17q23.3	protein_coding	1.76175	1.48132	5.47134	5.0526	4.89071	4.15817
Up	ENSG00000010610	3.27164	0.0244	CD4	12p13.31	protein_coding	0.952548	1.015	4.9122	3.12073	4.32149	4.66722
Up	ENSG00000117143	3.27127	0.0411	UAP1	1q23.3	protein_coding	3.38044	4.06568	5.9719	6.6593	8.25797	7.08815
Up	ENSG00000156508	3.26667	0.0307	EEF1A1	6q13	protein_coding	9.57472	8.37332	11.1515	12.473	12.6542	12.6841
Up	ENSG00000114268	3.26152	0.0994	PFKFB4	3p21.31	protein_coding	1.25436	2.04259	5.84792	3.80263	3.5687	6.42075
Up	ENSG00000179403	3.26033	0.0385	VWA1	1p36.33	protein_coding	3.07929	2.68738	7.2651	6.51149	5.05533	5.74274
Up	ENSG00000142949	3.25935	0.0669	PTPRF	1p34.2	protein_coding	1.20347	0.875567	5.39889	4.17011	2.61841	5.00807
Up	ENSG00000249915	3.25696	0.0682	PDCD6	5p15.33	protein_coding	4.3641	4.30691	8.20284	8.76318	5.88527	7.51857
Up	ENSG00000143870	3.25452	0.0298	PDIA6	2p25.1	protein_coding	4.36278	4.59894	7.45227	8.67845	6.68487	8.1259
Up	ENSG00000102575	3.25412	0.0425	ACP5	19p13.2	protein_coding	1.23263	0.336274	3.16939	4.90508	3.28386	4.79594
Up	ENSG00000104419	3.25406	0.0304	NDRG1	8q24.22	protein_coding	3.8406	4.16413	6.98483	6.25204	8.30674	7.48212
Up	ENSG00000153551	3.24049	0.0255	CMTM7	3p22.3	protein_coding	0.382564	1.08817	3.15778	3.59885	4.30146	4.84534
Up	ENSG00000034510	3.23945	0.0777	TMSB10	2p11.2	protein_coding	8.23231	7.7877	11.1582	9.45362	12.3627	12.0233
Up	ENSG00000187049	3.23902	0.0462	TMEM216 ENSG00000187049	11q12.2	protein_coding	1.91349	1.13408	4.78177	5.89085	3.46622	4.91235
Up	ENSG00000163235	3.23862	0.0809	TGFA ENSG00000163235	2p13.3	protein_coding	0	0	2.57031	2.35167	2.80955	5.22294
Up	ENSG00000137834	3.2378	0.0259	SMAD6	15q22.31	protein_coding	0.942606	1.02932	4.58443	5.1399	3.29856	3.87217
Up	ENSG00000239672	3.23752	0.00706	NME1	17q21.33	protein_coding	3.60101	3.54538	6.21697	7.069	6.76703	7.18984
Up	ENSG00000166068	3.23698	0.0349	SPRED1	15q14	protein_coding	0.888091	0.522254	2.75002	4.36189	4.86275	3.79394
Up	ENSG00000185624	3.23616	0.0265	P4HB	17q25.3	protein_coding	7.13231	7.56914	10.7869	11.5985	9.76273	10.1994
Up	ENSG00000126391	3.23543	0.045	FRMD8	11q13.1	protein_coding	2.14209	2.89739	7.07522	5.43176	4.73088	5.78281
Up	ENSG00000173207	3.23537	0.017	CKS1B	1q21.3	protein_coding	2.39099	2.44544	5.21801	5.57136	5.20595	6.61901
Up	ENSG00000115935	3.23419	0.0302	WIPF1	2q31.1	protein_coding	1.36022	1.91196	6.01743	4.47049	4.90946	4.08372
Up	ENSG00000197238	3.23414	0.0785	H4C11	6p22.1	protein_coding	1.47924	0	2.42143	5.21238	3.90005	4.36118
Up	ENSG00000140525	3.23181	0.0059	FANCI	15q26.1	protein_coding	0.349481	0.381116	3.98622	3.57311	3.05309	3.77603
Up	ENSG00000120742	3.22514	0.00216	SERP1	3q25.1	protein_coding	3.41974	3.13552	6.41127	6.757	6.35292	6.48989
Up	ENSG00000139625	3.22507	0.015	MAP3K12	12q13.13	protein_coding	1.70302	0.978898	5.25405	4.75656	4.09392	4.15956
Up	ENSG00000144645	3.22256	0.00239	OSBPL10	3p22.3	protein_coding	1.32376	1.50003	4.39048	4.91034	4.60917	4.62782
Up	ENSG00000136859	3.22095	0.0407	ANGPTL2	9q33.3	protein_coding	3.76886	5.41749	8.44298	8.41803	7.19632	7.19919
Up	ENSG00000112984	3.21914	0.0235	KIF20A	5q31.2	protein_coding	0	0.0480339	3.34356	2.95594	2.42587	4.24727
Up	ENSG00000197122	3.21913	0.0275	SRC	20q11.23	protein_coding	0.810985	1.1512	4.3037	3.15347	5.13647	4.20724
Up	ENSG00000067082	3.21867	0.0919	KLF6	10p15.2	protein_coding	2.86812	4.51414	6.25509	7.40802	8.37636	5.59971
Up	ENSG00000184840	3.21783	0.00753	TMED9	5q35.3	protein_coding	4.34424	4.78256	7.50329	8.23299	7.37308	8.01554
Up	ENSG00000088325	3.21428	0.0454	TPX2	20q11.21	protein_coding	0.49106	1.42296	3.97784	3.86591	3.30834	5.53307
Up	ENSG00000166997	3.21037	0.0168	CNPY4	7q22.1	protein_coding	2.58906	2.14836	6.1302	6.11551	5.0723	4.9983
Up	ENSG00000197965	3.20646	0.0121	MPZL1	1q24.2	protein_coding	2.96826	2.92106	5.58523	6.46898	6.76514	5.78511
Up	ENSG00000149554	3.20572	0.0398	CHEK1	11q24.2	protein_coding	0.524773	0.417231	4.44413	3.85624	2.27763	4.12887
Up	ENSG00000134996	3.20419	0.0201	OSTF1	9q21.13	protein_coding	2.22094	1.74885	4.44953	5.00946	5.19849	6.09887
Up	ENSG00000130733	3.20348	0.0428	YIPF2	19p13.2	protein_coding	3.43941	3.4122	6.87692	7.05681	5.17419	7.40921
Up	ENSG00000124126	3.20291	0.0202	PREX1	20q13.13	protein_coding	1.90013	2.48816	5.58739	4.52917	5.32559	6.1461
Up	ENSG00000187260	3.20154	0.0939	WDR86	7q36.1	protein_coding	0.441443	0.559063	2.66159	3.9837	2.58204	5.57985
Up	ENSG00000070495	3.19848	0.00464	JMJD6	17q25.1	protein_coding	3.22389	3.99292	6.95566	6.87875	6.7564	6.63676
Up	ENSG00000176853	3.19771	0.0132	FAM91A1	8q24.13	protein_coding	0.908709	0.729776	3.26254	4.41372	3.88462	4.50694
Up	ENSG00000020181	3.19708	0.0643	ADGRA2	8p11.23	protein_coding	2.18736	1.99443	5.30306	3.99083	4.99224	6.86578
Up	ENSG00000141424	3.19655	0.0329	SLC39A6	18q12.2	protein_coding	1.89401	2.25726	4.22969	6.22811	4.93555	5.69541
Up	ENSG00000081760	3.19571	0.0433	AACS	12q24.31	protein_coding	1.54336	2.71036	5.53692	4.63663	4.64271	6.47399
Up	ENSG00000111775	3.19506	0.0468	COX6A1	12q24.31	protein_coding	5.21357	4.5309	6.98966	7.70706	8.20809	9.36438
Up	ENSG00000062716	3.19349	0.0313	VMP1	17q23.1	protein_coding	2.93716	3.48213	7.17403	7.0092	6.02658	5.40273
Up	ENSG00000278032	3.19294	0.0108	LY6E	CHR_HSCHR8_4_CTG7	protein_coding	3.96675	3.67773	7.11125	6.3042	7.53161	7.11367
Up	ENSG00000120129	3.18961	0.013	DUSP1	5q35.1	protein_coding	5.26654	5.07201	8.8585	8.60973	8.41483	7.55248
Up	ENSG00000237515	3.18931	0.0769	SHISA9	16p13.12	protein_coding	0.990916	0.481921	3.95444	5.61454	2.56587	3.56808
Up	ENSG00000178031	3.18546	0.0142	ADAMTSL1	9p22.2	protein_coding	0.04192	0.091123	3.27641	2.5955	4.03767	3.09834
Up	ENSG00000114541	3.18516	0.0512	FRMD4B ENSG00000114541	3p14.1	protein_coding	0.815543	1.29917	3.56035	3.49978	4.15088	5.75908
Up	ENSG00000197136	3.18515	0.0429	PCNX3	11q13.1	protein_coding	2.16758	2.26068	6.1215	4.43628	4.66392	6.3754
Up	ENSG00000119777	3.18258	0.0241	TMEM214	2p23.3	protein_coding	3.68125	3.90905	6.99233	7.58945	5.89894	7.43022
Up	ENSG00000182022	3.17583	0.0237	CHST15	10q26.13	protein_coding	1.08579	2.51181	4.90416	5.67394	4.7796	4.54083
Up	ENSG00000010310	3.17526	0.0043	GIPR	19q13.32	protein_coding	0.112641	0.297105	3.54526	2.91036	3.57994	3.48499
Up	ENSG00000203818	3.17476	0.0207	NA	NANA	NA	0	0	4.2086	3.08789	2.73251	2.67005
Up	ENSG00000141380	3.17389	0.00595	SS18	18q11.2	protein_coding	2.70537	2.26655	5.27914	5.82552	5.47518	6.05954
Up	ENSG00000224156	3.17222	0.0118	TUBB	CHR_HSCHR6_MHC_APD_CTG1	protein_coding	4.24979	5.07556	7.72411	7.42721	7.75778	8.43046
Up	ENSG00000087088	3.1721	0.0351	BAX	19q13.33	protein_coding	3.26797	3.96821	7.80469	6.07441	6.08848	7.19318
Up	ENSG00000203814	3.1717	0.0456	H2BC18 ENSG00000203814	1q21.2	protein_coding	0.0677736	0.145805	2.31493	4.70907	3.09365	2.9963
Up	ENSG00000178809	3.17117	0.0825	TRIM73	7q11.23	protein_coding	0.846855	0.998398	4.32181	3.52342	2.72055	5.80942
Up	ENSG00000243279	3.17101	0.0618	PRAF2	Xp11.23	protein_coding	2.52123	2.54408	6.77695	6.15922	5.81257	4.06592
Up	ENSG00000162704	3.17088	0.0175	ARPC5	1q25.3	protein_coding	3.24535	2.95009	5.62597	6.05875	6.2267	7.16298
Up	ENSG00000161847	3.16717	0.0286	RAVER1	19p13.2	protein_coding	2.09984	2.33254	6.26396	5.03833	4.41527	5.81589
Up	ENSG00000166086	3.16684	0.00526	JAM3	11q25	protein_coding	2.04498	2.5156	5.1064	5.70549	5.71834	5.25828
Up	ENSG00000119333	3.16443	0.0573	DYNC2I2	9q34.11	protein_coding	2.03972	2.75978	7.13283	5.25066	4.68216	5.19107
Up	ENSG00000167601	3.1627	0.0315	AXL	19q13.2	protein_coding	1.88598	1.67244	5.30476	3.75145	5.74724	4.9642
Up	ENSG00000173295	3.16207	0.0245	FAM86B3P	8p23.1	transcribed_unprocessed_pseudogene	0.982688	0.14498	4.60625	3.55311	2.94697	3.79726
Up	ENSG00000172757	3.16169	0.0075	CFL1	11q13.1	protein_coding	6.27755	6.51597	9.76741	9.02689	9.43511	10.0044
Up	ENSG00000187231	3.15843	0.00491	SESTD1	2q31.2	protein_coding	1.30227	1.65784	4.37462	4.69231	5.06899	4.41805
Up	ENSG00000064932	3.15695	0.0539	SBNO2	19p13.3	protein_coding	2.57652	3.4689	6.73273	4.88611	7.20993	5.88986
Up	ENSG00000075218	3.15518	0.036	GTSE1	22q13.31	protein_coding	0.502959	0.273634	4.0301	3.13218	2.49391	4.51772
Up	ENSG00000144867	3.15251	0.0242	SRPRB	3q22.1	protein_coding	2.57907	3.00388	5.32536	5.68752	5.74212	7.02092
Up	ENSG00000010278	3.14924	0.0205	CD9	12p13.31	protein_coding	4.63172	4.68088	6.8407	8.53275	7.92926	7.91945
Up	ENSG00000173166	3.14915	0.0158	RAPH1	2q33.2	protein_coding	1.24593	1.66779	4.70102	4.98966	4.99985	3.73353
Up	ENSG00000163521	3.14686	0.0157	GLB1L	2q35	protein_coding	0.869665	0.751724	4.63138	4.28759	3.26175	3.64951
Up	ENSG00000142627	3.13882	0.0266	EPHA2	1p36.13	protein_coding	1.58261	1.56472	4.63172	5.54517	3.67074	5.00234
Up	ENSG00000090615	3.13774	0.0549	GOLGA3	12q24.33	protein_coding	2.84173	2.97835	6.97291	5.9489	4.55906	6.71024
Up	ENSG00000137501	3.1335	0.01	SYTL2	11q14.1	protein_coding	2.25746	1.9951	5.8875	5.28781	4.71008	5.15372
Up	ENSG00000228300	3.13167	0.022	FAM174C	19p13.3	protein_coding	3.83903	2.77007	7.16463	6.21521	5.80504	6.56003
Up	ENSG00000167766	3.13104	0.0564	ZNF83	19q13.41	protein_coding	2.35181	1.5583	6.16984	5.61437	3.76218	4.79801
Up	ENSG00000271064	3.12787	0.0399		7q11.21	processed_pseudogene	0	0	4.42797	2.17721	2.9684	2.9379
Up	ENSG00000072786	3.12734	0.0561	STK10 ENSG00000072786	5q35.1	protein_coding	1.68207	2.12343	4.31837	4.09903	6.46698	5.236
Up	ENSG00000130816	3.1263	0.0379	DNMT1	19p13.2	protein_coding	3.27491	2.90682	6.93013	5.10978	5.83799	6.99074
Up	ENSG00000169230	3.12594	0.00516	PRELID1	5q35.3	protein_coding	3.57958	3.5592	6.57899	6.26527	6.83613	7.10095
Up	ENSG00000134107	3.12584	0.00969	BHLHE40	3p26.1	protein_coding	5.45477	5.24371	8.87541	8.71982	8.50881	7.79628
Up	ENSG00000107130	3.12511	0.0547	NCS1	9q34.11	protein_coding	0.334233	0.708641	4.47039	2.16708	4.38636	3.56234
Up	ENSG00000167604	3.12296	0.0247	NFKBID	19q13.12	protein_coding	0.586132	0.977027	4.90092	3.57582	3.16521	3.97623
Up	ENSG00000108557	3.12262	0.0573	RAI1	17p11.2	protein_coding	2.5962	2.18203	6.64724	5.25451	4.12339	6.02177
Up	ENSG00000102595	3.12147	0.00771	UGGT2	13q32.1	protein_coding	0.980013	0.832186	4.30663	4.46226	3.5325	3.80889
Up	ENSG00000185684	3.12119	0.0494	EP400P1	12q24.33	transcribed_unprocessed_pseudogene	1.65442	2.22748	6.04639	4.3747	4.02941	5.79806
Up	ENSG00000067057	3.11985	0.0403	PFKP	10p15.2	protein_coding	2.9073	4.18772	7.04223	6.71591	7.35469	5.55661
Up	ENSG00000168917	3.11969	0.014	SLC35G2	3q22.3	protein_coding	1.22364	0.818092	3.46183	3.9967	4.78248	4.32124
Up	ENSG00000096433	3.11961	0.0138	ITPR3	6p21.31	protein_coding	1.44501	1.0246	4.82036	3.91679	3.84569	4.83482
Up	ENSG00000146112	3.11931	0.0597	PPP1R18	6p21.33	protein_coding	0.66017	0.687697	4.84473	2.19991	4.02735	4.10097
Up	ENSG00000002834	3.11894	0.00274	LASP1	17q12	protein_coding	3.12296	3.08593	6.45106	6.2145	5.90261	6.32535
Up	ENSG00000011304	3.11729	0.00729	PTBP1	19p13.3	protein_coding	4.63798	4.69198	7.4978	7.42435	7.8597	8.34721
Up	ENSG00000128602	3.11669	0.0594	SMO	7q32.1	protein_coding	2.39133	2.2032	5.99565	5.90072	3.73805	6.0214
Up	ENSG00000116774	3.11616	0.068	OLFML3	1p13.2	protein_coding	2.4334	2.51227	5.87376	4.55081	7.14945	4.78194
Up	ENSG00000161800	3.11561	0.0683	RACGAP1	12q13.12	protein_coding	0.813341	1.46669	4.02707	4.49647	2.84535	5.65362
Up	ENSG00000170965	3.11487	0.0324	PLAC1	Xq26.3	protein_coding	0	0	3.70139	3.78936	1.93448	3.03425
Up	ENSG00000189337	3.11089	0.0266	KAZN	1p36.21	protein_coding	0.551939	0.502062	4.70548	3.73565	3.0229	3.08752
Up	ENSG00000166851	3.11033	0.0899	PLK1	16p12.2	protein_coding	1.28996	0.982197	5.59521	3.11131	3.08834	5.19077
Up	ENSG00000125089	3.1088	0.02	SH3TC1	4p16.1	protein_coding	1.75037	1.83404	5.91662	4.53895	4.7027	4.44578
Up	ENSG00000186792	3.10822	0.0473	HYAL3	3p21.31	protein_coding	0.198624	0	3.22314	2.73983	2.26362	4.60353
Up	ENSG00000158163	3.10719	0.00966	DZIP1L ENSG00000158163	3q22.3	protein_coding	1.04244	0.804095	4.68507	3.76644	4.04571	3.62463
Up	ENSG00000106571	3.10639	0.0388	GLI3	7p14.1	protein_coding	0.561977	0.243363	4.36481	4.11576	3.19004	2.36562
Up	ENSG00000178904	3.10496	0.0582	DPY19L3	19q13.11	protein_coding	1.02175	0.902916	4.46051	5.44914	3.2321	3.12744
Up	ENSG00000104738	3.10447	0.0303	MCM4	8q11.21	protein_coding	2.53893	3.30392	5.60343	5.75041	5.57655	7.17319
Up	ENSG00000033170	3.10377	0.039	FUT8	14q23.3	protein_coding	1.2146	1.13548	3.97693	5.64589	3.60621	3.88619
Up	ENSG00000114450	3.10227	0.0257	GNB4	3q26.33	protein_coding	0.796535	0.693669	4.44182	4.57535	3.15163	3.22069
Up	ENSG00000229097	3.10176	0.0921	CALM2P2	10q22.1	processed_pseudogene	1.15215	0.535405	4.8017	5.355	2.79674	2.82872
Up	ENSG00000145817	3.10071	0.0168	YIPF5	5q31.3	protein_coding	1.90402	2.03443	4.77432	6.00473	4.68058	4.8201
Up	ENSG00000130270	3.09905	0.0556	ATP8B3	19p13.3	protein_coding	0.0614541	0	4.14232	2.29925	2.10284	3.97472
Up	ENSG00000090776	3.09857	0.00969	EFNB1	Xq13.1	protein_coding	2.52203	1.96014	5.42706	5.51946	4.72703	5.68506
Up	ENSG00000166451	3.09845	0.0107	CENPN	16q23.2	protein_coding	0.898218	1.13034	4.47606	3.39097	4.40535	4.17853
Up	ENSG00000001630	3.09397	0.0689	CYP51A1	7q21.2	protein_coding	1.94515	1.20065	3.09796	4.54397	5.33764	5.6879
Up	ENSG00000133657	3.09307	0.0591	ATP13A3	3q29	protein_coding	1.35414	1.61184	3.81936	4.46918	6.17046	3.84523
Up	ENSG00000110274	3.09186	0.0512	CEP164	11q23.3	protein_coding	2.40799	1.13641	5.82033	4.9356	3.64712	5.05318
Up	ENSG00000143476	3.09149	0.00724	DTL	1q32.3	protein_coding	0	0.0749808	3.23964	3.63073	2.64009	3.00547
Up	ENSG00000244405	3.08776	0.0281	ETV5	3q27.2	protein_coding	1.06853	1.09221	4.0809	5.1636	3.22019	4.20785
Up	ENSG00000183114	3.08645	0.0366	FAM43B	1p36.12	protein_coding	0.436969	0.392765	4.54891	3.28746	3.76169	2.4072
Up	ENSG00000152527	3.08481	0.0573	PLEKHH2	2p21	protein_coding	0.700805	1.18003	4.55757	5.06043	2.59086	3.89207
Up	ENSG00000165046	3.08447	0.0332	LETM2	8p11.23	protein_coding	0.776182	0.493715	4.0412	3.53887	4.65315	2.64447
Up	ENSG00000071575	3.08329	0.0374	TRIB2	2p24.3	protein_coding	2.87838	2.19313	6.09326	6.41048	4.45643	5.516
Up	ENSG00000147535	3.08274	0.0385	PLPP5	8p11.23	protein_coding	3.31195	2.91201	6.5233	7.16224	5.02595	6.06739
Up	ENSG00000052802	3.08214	0.0173	MSMO1	4q32.3	protein_coding	2.10396	1.21842	4.90224	4.34032	4.31659	5.41416
Up	ENSG00000175354	3.08173	0.0106	PTPN2 ENSG00000175354	18p11.21	protein_coding	2.63768	2.37244	5.97141	5.06938	6.03597	5.27039
Up	ENSG00000184640	3.08166	0.00969	SEPTIN9	17q25.3	protein_coding	4.83468	4.86268	8.31674	7.34389	7.73918	8.32156
Up	ENSG00000013288	3.08155	0.0206	MAN2B2	4p16.1	protein_coding	1.40011	1.39558	5.20418	4.84679	3.64378	4.22284
Up	ENSG00000237276	3.08155	0.0429	ANO7L1	1p36.13	transcribed_unprocessed_pseudogene	0.749222	0	4.71097	3.50607	2.661	2.9466
Up	ENSG00000130958	3.08129	0.0152	SLC35D2	9q22.32	protein_coding	1.13674	0.981504	4.79392	4.48544	3.69504	3.58726
Up	ENSG00000070961	3.07831	0.0144	ATP2B1	12q21.33	protein_coding	2.44406	2.76163	4.92629	6.29572	5.7527	5.74992
Up	ENSG00000122863	3.07696	0.0262	CHST3	10q22.1	protein_coding	1.86342	3.29006	5.76095	5.75675	4.95449	6.14259
Up	ENSG00000130175	3.07547	0.0287	PRKCSH	19p13.2	protein_coding	5.46806	5.79913	9.63106	8.54181	7.73555	8.92785
Up	ENSG00000197712	3.07228	0.0573	FAM114A1	4p14	protein_coding	2.65814	3.27472	6.59261	7.20018	4.86169	5.50034
Up	ENSG00000050327	3.07209	0.00338	ARHGEF5	7q35	protein_coding	0.388173	0.294238	3.38381	3.50323	3.06994	3.69619
Up	ENSG00000183092	3.06998	0.0471	BEGAIN	14q32.2	protein_coding	0.245324	0.507526	4.77965	3.19443	2.39254	3.419
Up	ENSG00000090520	3.06469	0.0164	DNAJB11	3q27.3	protein_coding	2.83331	3.22296	5.27333	6.37235	6.09062	6.635
Up	ENSG00000138180	3.06366	0.036	CEP55	10q23.33	protein_coding	0	0	4.03916	2.96906	1.92002	3.32641
Up	ENSG00000102908	3.06212	0.014	NFAT5	16q22.1	protein_coding	1.23994	1.31785	4.33728	5.00475	3.62304	4.39899
Up	ENSG00000088986	3.06163	0.0404	DYNLL1	12q24.31	protein_coding	5.70043	4.11392	7.14194	7.84329	8.16378	8.72619
Up	ENSG00000149577	3.05915	0.0845	SIDT2	11q23.3	protein_coding	3.69594	3.35252	7.48675	7.25803	4.7088	6.87993
Up	ENSG00000111711	3.057	0.0555	GOLT1B	12p12.1	protein_coding	2.22517	2.52757	4.00568	5.6181	5.5619	6.54779
Up	ENSG00000280638	3.05523	0.0687	CDH12P2	CHR_HSCHR5_1_CTG1_1	unprocessed_pseudogene	2.44692	0	4.52763	4.65954	3.35947	4.56811
Up	ENSG00000198826	3.05416	0.0182	ARHGAP11A	15q13.3	protein_coding	0.39845	0.802316	4.29967	3.32376	2.95401	4.04072
Up	ENSG00000006534	3.05386	0.0359	ALDH3B1 ENSG00000006534	11q13.2	protein_coding	1.01651	1.12331	5.21109	3.77191	3.15246	4.35963
Up	ENSG00000145725	3.05351	0.0565	PPIP5K2	5q21.1	protein_coding	1.68478	1.59919	4.04608	5.85575	3.56701	5.31314
Up	ENSG00000164211	3.05345	0.0149	STARD4	5q22.1	protein_coding	0.272653	0.417879	3.44094	4.15001	3.25121	2.75273
Up	ENSG00000067167	3.05207	0.0579	TRAM1	8q13.3	protein_coding	3.31607	3.47506	4.84511	7.07858	6.75681	7.11005
Up	ENSG00000135678	3.04945	0.0598	CPM	12q15	protein_coding	1.23132	1.18776	5.03573	4.86049	2.64405	4.49569
Up	ENSG00000131480	3.04877	0.0686	AOC2	17q21.31	protein_coding	0.495293	0.304137	4.45483	3.35654	1.84157	4.14098
Up	ENSG00000150540	3.04653	0.0523	HNMT	2q22.1	protein_coding	1.49008	1.72264	3.11213	5.1729	5.13171	5.19481
Up	ENSG00000089692	3.04491	0.0738	LAG3	12p13.31	protein_coding	0.563473	0.689242	2.46545	3.6017	3.29297	5.32495
Up	ENSG00000113810	3.04482	0.00952	SMC4	3q25.33	protein_coding	2.21089	1.89423	5.15613	5.68344	4.9232	4.62675
Up	ENSG00000183943	3.04411	0.0392	PRKX	Xp22.33	protein_coding	0.810428	1.02264	4.02801	3.51627	5.19345	3.10484
Up	ENSG00000105717	3.04376	0.0665	PBX4	19p13.11	protein_coding	0.22427	0.440226	4.56083	2.3919	2.39246	4.15884
Up	ENSG00000163913	3.04336	0.0188	IFT122	3q21.3	protein_coding	2.05332	2.54935	5.91002	5.30078	4.49454	5.67342
Up	ENSG00000062822	3.04308	0.0714	POLD1	19q13.33	protein_coding	2.53658	2.64894	6.69576	4.26182	5.03255	6.55323
Up	ENSG00000176658	3.04284	0.0347	MYO1D	17q11.2	protein_coding	2.18297	1.45018	6.02536	4.43958	4.74712	4.2256
Up	ENSG00000109472	3.04229	0.0319	CPE	4q32.3	protein_coding	4.20301	3.62431	7.33648	7.86481	6.531	6.09148
Up	ENSG00000102034	3.04076	0.0118	ELF4	Xq26.1	protein_coding	0.806379	0.804563	4.06662	3.59156	4.4497	3.27703
Up	ENSG00000150760	3.04047	0.0248	DOCK1	10q26.2	protein_coding	1.27704	1.22486	5.03004	4.40737	4.46102	3.26723
Up	ENSG00000198131	3.03858	0.0459	ZNF544	19q13.43	protein_coding	1.06815	1.30676	5.32082	4.1008	2.98793	4.4946
Up	ENSG00000164054	3.03833	0.0266	SHISA5	3p21.31	protein_coding	3.56734	3.19399	7.44055	5.64628	6.28505	6.30409
Up	ENSG00000146426	3.03597	0.035	TIAM2	6q25.2	protein_coding	2.36526	2.74833	6.01635	6.57077	4.77734	5.00659
Up	ENSG00000070081	3.03467	0.0415	NUCB2	11p15.1	protein_coding	4.10576	4.50259	6.73499	8.62212	6.63523	7.36303
Up	ENSG00000150967	3.03349	0.0576	ABCB9	12q24.31	protein_coding	1.33438	1.01002	4.88786	4.00819	2.78625	5.14047
Up	ENSG00000154217	3.03285	0.0491	PITPNC1	17q24.2	protein_coding	1.46229	2.20554	4.94022	5.68529	5.33091	3.51063
Up	ENSG00000163932	3.03071	0.00377	PRKCD	3p21.1	protein_coding	1.29825	1.334	4.64658	4.06734	4.52442	4.149
Up	ENSG00000171943	3.02984	0.0149	SRGAP2C	1p11.2	protein_coding	0.782327	0.396986	3.7143	4.26935	2.91869	3.57565
Up	ENSG00000205593	3.02949	0.0268	DENND6B	22q13.33	protein_coding	0.945668	0.53997	4.82758	3.31957	3.18928	3.75279
Up	ENSG00000136449	3.02648	0.0337	MYCBPAP	17q21.33	protein_coding	0.96781	0.996874	4.74917	4.7213	3.17598	3.38884
Up	ENSG00000203760	3.025	0.0617	CENPW	6q22.32	protein_coding	0.529266	0.524488	2.93593	3.02639	3.03617	5.20901
Up	ENSG00000106803	3.02478	0.0455	SEC61B	9q22.33	protein_coding	4.91594	4.60113	6.70917	7.48059	8.99532	7.9482
Up	ENSG00000141448	3.02352	0.0441	GATA6	18q11.2	protein_coding	0.337538	0.301853	2.90199	2.27058	4.42743	3.77289
Up	ENSG00000082438	3.02232	0.0575	COBLL1	2q24.3	protein_coding	1.42387	0.522236	3.98048	5.40978	3.17701	3.41422
Up	ENSG00000047578	3.01651	0.00576	KATNIP	16p12.1	protein_coding	1.48514	1.1119	4.50613	4.14916	3.94458	4.66023
Up	ENSG00000122884	3.0156	0.0764	P4HA1	10q22.1	protein_coding	4.29413	4.49388	6.55216	8.67959	6.21971	8.18697
Up	ENSG00000111328	3.01505	0.0185	CDK2AP1 ENSG00000111328	12q24.31	protein_coding	4.89483	5.13512	7.94227	8.07899	7.27941	8.81941
Up	ENSG00000087253	3.01379	0.0125	LPCAT2	16q12.2	protein_coding	1.10997	0.49818	3.43503	4.39589	3.44983	3.99072
Up	ENSG00000116729	3.01269	0.0758	WLS	1p31.3	protein_coding	2.81762	3.03241	5.1717	6.07515	4.92402	7.57994
Up	ENSG00000119042	3.01221	0.0902	SATB2	2q33.1	protein_coding	1.95136	0.267626	5.11237	4.78009	2.6389	3.95543
Up	ENSG00000124145	3.01203	0.0421	SDC4	20q13.12	protein_coding	3.80041	4.34041	6.19205	6.7018	7.13084	8.30509
Up	ENSG00000131236	3.01143	0.00554	CAP1 ENSG00000131236	1p34.2	protein_coding	3.61888	3.78886	6.77972	6.22695	6.81856	7.03599
Up	ENSG00000173638	3.01136	0.0191	SLC19A1	21q22.3	protein_coding	0.699744	0.940335	3.91871	3.10484	3.65407	4.64797
Up	ENSG00000250687	3.01134	0.0353	NAIPP1	5q13.2	transcribed_unprocessed_pseudogene	0	0.0868245	1.99631	4.06194	3.24889	2.91188
Up	ENSG00000254126	3.00895	0.0317	CD8B2	2q12.2	protein_coding	0.0604902	0.0284744	2.668	4.27946	2.60413	2.66214
Up	ENSG00000148248	3.00865	0.015	SURF4	9q34.2	protein_coding	3.97939	5.06919	7.0193	7.77134	7.81527	7.52584
Up	ENSG00000099256	3.00854	0.0245	PRTFDC1	10p12.1	protein_coding	0.587066	0.865833	3.02563	4.68643	3.37925	3.84866
Up	ENSG00000116679	3.00758	0.0384	IVNS1ABP	1q25.3	protein_coding	2.61894	3.67256	6.29883	6.77881	6.51141	5.02424
Up	ENSG00000100889	3.00749	0.0821	PCK2	14q11.2	protein_coding	0.854995	0.738724	4.53233	3.63657	2.12134	4.92718
Up	ENSG00000131979	3.00351	0.0789	GCH1	14q22.2	protein_coding	1.00046	0.551647	4.01674	3.3373	5.31591	2.4483
Up	ENSG00000101052	3.00172	0.00716	IFT52	20q13.12	protein_coding	1.81376	1.28767	4.12229	4.78805	4.45282	4.84659
Up	ENSG00000136603	3.00146	0.0629	SKIL	3q26.2	protein_coding	1.44329	2.31321	4.78337	6.24876	4.79203	3.6947
Up	ENSG00000087903	3.00056	0.0619	RFX2 ENSG00000087903	19p13.3	protein_coding	2.68831	1.25147	5.13155	4.06363	6.19846	4.48817
Up	ENSG00000099992	2.99953	0.0234	TBC1D10A	22q12.2	protein_coding	2.29523	1.84187	5.74553	4.12633	5.07891	5.32154
Up	ENSG00000076944	2.99904	0.0758	STXBP2	19p13.2	protein_coding	0.43604	2.36807	5.57371	3.4112	4.1179	4.50159
Up	ENSG00000132510	2.99828	0.0985	KDM6B	17p13.1	protein_coding	3.28077	2.93846	4.9954	5.43226	8.02264	5.98128
Up	ENSG00000132535	2.99649	0.0262	DLG4	17p13.1	protein_coding	2.24346	1.91027	5.99238	5.0609	4.19765	5.04247
Up	ENSG00000109083	2.99559	0.00329	IFT20	17q11.2	protein_coding	3.32997	3.08664	6.25158	6.01122	6.04103	6.51175
Up	ENSG00000224370	2.99546	0.0737		7p11.2	processed_pseudogene	1.03964	0	4.85055	3.87853	2.27822	3.05381
Up	ENSG00000255150	2.99025	0.0629	EID3	12q23.3	protein_coding	0.0937238	0	1.76632	3.48603	4.31139	2.5847
Up	ENSG00000164929	2.99007	0.00513	BAALC	8q22.3	protein_coding	0.964872	1.02611	4.2479	3.57317	4.26722	3.85398
Up	ENSG00000162551	2.98967	0.0455	ALPL	1p36.12	protein_coding	0.79045	0.632652	4.3134	2.30112	4.28019	3.91017
Up	ENSG00000136193	2.98506	0.0262	SCRN1	7p14.3	protein_coding	1.20264	0.662141	3.69476	4.97071	3.47602	3.52832
Up	ENSG00000271605	2.98444	0.0593	MILR1	17q23.3	protein_coding	0	1.03695	4.70823	3.6842	2.33088	3.28834
Up	ENSG00000268041	2.98329	0.0618	ERFL	19q13.2	protein_coding	0.12396	0	3.48629	1.68158	2.76897	4.24425
Up	ENSG00000135269	2.98292	0.0772	TES	7q31.2	protein_coding	1.78546	2.13801	4.19058	3.6674	6.05149	5.86916
Up	ENSG00000184988	2.98201	0.0698	TMEM106A	17q21.31	protein_coding	0.687135	0.489911	4.81899	4.05243	2.12741	3.28331
Up	ENSG00000128016	2.98196	0.0597	ZFP36	19q13.2	protein_coding	6.12199	6.48026	9.45312	10.5517	9.16324	7.96429
Up	ENSG00000167306	2.98029	0.00288	MYO5B	18q21.1	protein_coding	0.0795836	0.170416	3.28861	2.85691	2.97422	3.30142
Up	ENSG00000169504	2.97998	0.044	CLIC4	1p36.11	protein_coding	3.14766	3.30983	5.03769	6.74125	7.13775	5.91819
Up	ENSG00000106089	2.97904	0.0844	STX1A	7q11.23	protein_coding	1.91399	0.730632	4.67189	2.75687	5.50108	4.27554
Up	ENSG00000120594	2.97664	0.0425	PLXDC2	10p12.31	protein_coding	1.09768	1.19238	3.24821	4.4073	5.28522	3.54596
Up	ENSG00000147145	2.97639	0.0223	LPAR4	Xq21.1	protein_coding	0	0	2.91846	3.96521	2.55212	2.46975
Up	ENSG00000162576	2.97518	0.0141	MXRA8	1p36.33	protein_coding	4.9474	4.87213	8.05717	7.06451	8.21731	8.20079
Up	ENSG00000134690	2.97394	0.048	CDCA8	1p34.3	protein_coding	0	0.179641	3.88284	2.63742	1.89466	3.84012
Up	ENSG00000064012	2.97364	0.056	CASP8	2q33.1	protein_coding	0.977739	0.843555	4.03703	4.04218	2.48232	4.97563
Up	ENSG00000129474	2.97301	0.0731	AJUBA	14q11.2	protein_coding	0.913167	0.540601	4.29154	4.2957	1.96113	4.25118
Up	ENSG00000090924	2.97284	0.0172	PLEKHG2	19q13.2	protein_coding	2.81252	1.65315	5.48108	4.83767	4.91894	5.58501
Up	ENSG00000180353	2.97228	0.0429	HCLS1	3q13.33	protein_coding	2.14806	1.98738	5.64053	5.89933	4.74029	3.87984
Up	ENSG00000101856	2.97086	0.019	PGRMC1	Xq24	protein_coding	3.0622	2.86232	5.04071	6.50661	5.98726	6.19791
Up	ENSG00000116157	2.96931	0.0455	GPX7	1p32.3	protein_coding	2.32129	2.41306	5.94026	6.34501	4.50071	4.55995
Up	ENSG00000104611	2.96862	0.0252	SH2D4A	8p21.3	protein_coding	0.375924	0.630882	3.11459	4.43441	2.77738	3.5617
Up	ENSG00000073792	2.96845	0.0697	IGF2BP2	3q27.2	protein_coding	0.94791	0.92702	4.91468	4.28879	2.26077	4.15944
Up	ENSG00000164924	2.9671	0.017	YWHAZ	8q22.3	protein_coding	5.08463	4.43204	7.02782	7.5747	8.19944	8.09979
Up	ENSG00000153250	2.96616	0.0168	RBMS1	2q24.2	protein_coding	2.54892	2.8258	5.52092	5.40384	6.50688	5.18244
Up	ENSG00000139163	2.96497	0.017	ETNK1	12p12.1	protein_coding	1.45251	1.68429	3.78028	5.13063	4.35452	4.86805
Up	ENSG00000152953	2.96345	0.0635	STK32B	4p16.2	protein_coding	0.846015	0.480591	3.79176	5.09005	2.64744	2.97774
Up	ENSG00000116260	2.96211	0.017	QSOX1	1q25.2	protein_coding	3.81673	4.45049	7.50231	7.47739	6.3365	7.06669
Up	ENSG00000134874	2.95745	0.0456	DZIP1	13q32.1	protein_coding	0.931444	1.02895	5.2611	3.72855	3.02741	3.73352
Up	ENSG00000148700	2.95665	0.0292	ADD3 ENSG00000148700	10q25.1	protein_coding	1.87916	2.38388	4.22711	5.06781	5.00769	6.05006
Up	ENSG00000275932	2.95527	0.0201	DUSP14	CHR_HSCHR17_7_CTG4	protein_coding	1.99656	2.03171	4.04068	5.33132	5.49472	5.0109
Up	ENSG00000214940	2.9542	0.0491	NPIPA8	16p12.3	protein_coding	0.465584	0	3.53731	1.88801	3.17035	4.1523
Up	ENSG00000159322	2.95409	0.00431	ADPGK	15q24.1	protein_coding	2.59838	2.77196	5.75693	5.74258	5.21829	5.83923
Up	ENSG00000214193	2.95385	0.0772	SH3D21	1p34.3	protein_coding	1.5848	0.829283	5.48165	4.39501	2.6902	4.07671
Up	ENSG00000172296	2.95351	0.0459	SPTLC3	20p12.1	protein_coding	0.0971375	0.289804	3.03184	4.31854	2.01904	3.21851
Up	ENSG00000005059	2.95309	0.0716	MCUB	4q25	protein_coding	1.36605	1.02097	3.99022	2.72619	5.49857	4.37139
Up	ENSG00000123810	2.95165	0.0143	B9D2	19q13.2	protein_coding	0.701903	0.65718	4.27421	3.27688	3.08169	3.89199
Up	ENSG00000134851	2.95157	0.00958	TMEM165	4q12	protein_coding	3.1644	3.69856	6.65	6.78878	6.05774	6.03566
Up	ENSG00000136960	2.95147	0.00826	ENPP2	8q24.12	protein_coding	1.54833	1.66991	4.44346	4.99249	4.77205	4.03437
Up	ENSG00000092820	2.95101	0.0491	EZR	6q25.3	protein_coding	3.07563	3.46715	5.33855	5.4459	7.07263	7.03252
Up	ENSG00000185697	2.95056	0.0611	MYBL1	8q13.1	protein_coding	0.444109	0.36506	4.00298	3.64044	1.76699	4.01016
Up	ENSG00000119986	2.94979	0.0166	AVPI1	10q24.2	protein_coding	1.69294	1.27569	4.85884	4.27016	3.70598	4.90145
Up	ENSG00000100379	2.94977	0.0223	KCTD17	22q12.3	protein_coding	1.65707	2.01374	5.1722	4.18289	4.26315	5.52247
Up	ENSG00000113368	2.94893	0.025	LMNB1	5q23.2	protein_coding	1.42189	1.30847	4.65523	3.79898	3.64657	5.15568
Up	ENSG00000184014	2.94883	0.0392	DENND5A	11p15.4	protein_coding	3.16404	3.98238	5.99655	6.18492	7.73373	6.17298
Up	ENSG00000001036	2.94732	0.00564	FUCA2	6q24.2	protein_coding	2.24204	1.51255	4.58095	4.94181	4.81024	4.96546
Up	ENSG00000183765	2.94563	0.0142	CHEK2	22q12.1	protein_coding	0.874987	1.19336	4.03015	3.21016	4.32968	4.34922
Up	ENSG00000166669	2.94541	0.0573	ATF7IP2 ENSG00000166669	16p13.2	protein_coding	0.964068	0.943573	4.93227	3.99217	4.20546	2.46704
Up	ENSG00000077458	2.94537	0.042	FAM76B	11q21	protein_coding	2.03216	1.10137	5.16328	4.93782	3.32655	4.62089
Up	ENSG00000186652	2.94517	0.0687	PRG2 ENSG00000186652	11q12.1	protein_coding	0	0	2.4679	1.69757	3.28128	4.33392
Up	ENSG00000082781	2.94504	0.0121	ITGB5	3q21.2	protein_coding	3.71649	4.71889	7.49455	7.08222	7.27988	6.79427
Up	ENSG00000131238	2.94451	0.0234	PPT1	1p34.2	protein_coding	3.21931	3.19959	5.35321	6.95361	5.85943	6.4496
Up	ENSG00000105939	2.94334	0.048	ZC3HAV1	7q34	protein_coding	0.931744	1.08286	2.55375	4.44045	4.68891	4.11943
Up	ENSG00000187634	2.93888	0.0481	SAMD11	1p36.33	protein_coding	0.772705	1.13425	4.52728	2.52822	3.95778	4.55615
Up	ENSG00000089639	2.93888	0.0468	GMIP	19p13.11	protein_coding	0.930164	0.488268	4.31115	3.03627	2.67454	4.57042
Up	ENSG00000198089	2.93767	0.0966	SFI1	22q12.2	protein_coding	2.57349	1.77116	6.40078	4.0168	4.03203	5.99037
Up	ENSG00000174939	2.93709	0.0236	ASPHD1 ENSG00000174939	16p11.2	protein_coding	0	0	2.22382	3.84326	2.60867	3.07261
Up	ENSG00000141391	2.93541	0.0907	PRELID3A	18p11.21	protein_coding	1.0818	0.456652	4.79854	2.48824	2.77725	4.75451
Up	ENSG00000137845	2.93385	0.0476	ADAM10	15q21.3	protein_coding	2.13982	1.34082	3.67925	5.46485	4.14974	5.40285
Up	ENSG00000182183	2.93372	0.0723	SHISAL2A	1p32.3	protein_coding	0.376041	0.211245	3.62226	4.66983	2.20291	2.41445
Up	ENSG00000111450	2.93364	0.0298	STX2	12q24.33	protein_coding	1.5993	1.79913	4.25638	4.01946	4.50445	5.75113
Up	ENSG00000035687	2.93229	0.0125	ADSS2	1q44	protein_coding	1.61249	1.82786	4.1915	4.98251	4.25509	5.18073
Up	ENSG00000105486	2.93177	0.0846	LIG1	19q13.33	protein_coding	2.63288	1.64748	6.46896	4.12675	4.10697	5.58515
Up	ENSG00000164933	2.9304	0.0127	SLC25A32	8q22.3	protein_coding	1.85846	1.93579	4.19981	5.00442	4.69251	5.41336
Up	ENSG00000106462	2.92982	0.021	EZH2	7q36.1	protein_coding	1.79898	1.7274	4.02231	4.46984	4.69762	5.58226
Up	ENSG00000205084	2.92927	0.0291	TMEM231	16q23.1	protein_coding	1.4277	0.766948	4.49847	4.4712	2.97863	4.15809
Up	ENSG00000267534	2.92643	0.03	S1PR2	19p13.2	protein_coding	0.605389	0.158234	3.86098	2.2581	3.85474	3.25915
Up	ENSG00000188229	2.92377	0.00505	TUBB4B	9q34.3	protein_coding	4.86953	5.3557	7.95652	7.91991	8.41045	7.85868
Up	ENSG00000115520	2.92242	0.0262	COQ10B	2q33.1	protein_coding	1.96266	2.04072	4.00121	4.7898	5.72885	5.17659
Up	ENSG00000135406	2.92123	0.0435	PRPH	12q13.12	protein_coding	0.728225	0.786975	3.80124	3.04353	2.95289	4.91768
Up	ENSG00000151239	2.91961	0.0712	TWF1	12q12	protein_coding	1.68099	1.76189	2.94491	5.07758	5.3169	5.2248
Up	ENSG00000270591	2.91768	0.0647		14q32.33	transcribed_processed_pseudogene	0	0	4.43041	2.59997	2.79608	1.84425
Up	ENSG00000172817	2.91742	0.0851	CYP7B1	8q12.3	protein_coding	0	0	1.59861	4.47249	3.19913	2.39943
Up	ENSG00000161091	2.91732	0.0538	MFSD12	19p13.3	protein_coding	3.13263	2.96878	7.01393	4.72105	5.68024	6.45689
Up	ENSG00000163479	2.9166	0.00912	SSR2	1q22	protein_coding	5.18835	5.61328	7.98968	8.73875	7.96641	8.57479
Up	ENSG00000136010	2.91651	0.0106	ALDH1L2	12q23.3	protein_coding	0.313095	0.507001	3.52971	3.72004	2.66259	3.3939
Up	ENSG00000109805	2.9156	0.0361	NCAPG	4p15.31	protein_coding	0.194899	0.381153	4.01332	3.40912	2.033	3.35907
Up	ENSG00000116985	2.91434	0.0609	BMP8B	1p34.2	protein_coding	0.78311	0.556678	4.96566	3.18359	2.46842	3.71926
Up	ENSG00000134287	2.91398	0.0141	ARF3	12q13.12	protein_coding	2.85473	3.24129	5.55917	5.87014	5.70925	6.70941
Up	ENSG00000161960	2.91313	0.0314	EIF4A1	17p13.1	protein_coding	5.7933	6.28007	7.96133	8.95345	9.81489	9.06959
Up	ENSG00000101310	2.91286	0.0158	SEC23B	20p11.23	protein_coding	1.54471	1.56726	4.22982	4.68266	3.82136	5.14156
Up	ENSG00000167491	2.91219	0.0275	GATAD2A ENSG00000167491	19p13.11	protein_coding	3.16058	3.36768	6.24141	5.15526	6.89375	6.41488
Up	ENSG00000123358	2.91217	0.0834	NR4A1	12q13.13	protein_coding	5.52577	4.79117	6.81602	7.32704	8.97219	9.16733
Up	ENSG00000160789	2.9118	0.076	LMNA	1q22	protein_coding	5.99234	6.63315	10.1822	7.74304	10.0393	8.93363
Up	ENSG00000167461	2.91156	0.0293	RAB8A	19p13.11	protein_coding	2.5036	2.04661	4.99437	5.21289	4.37651	6.16288
Up	ENSG00000278191	2.91023	0.00969	CARS1	CHR_HSCHR11_1_CTG7	protein_coding	3.13245	2.28211	5.62913	5.58893	5.28623	5.96576
Up	ENSG00000138606	2.9101	0.0345	SHF	15q21.1	protein_coding	1.69933	1.90738	5.63807	3.88758	4.19244	5.13572
Up	ENSG00000131015	2.90812	0.0742	ULBP2	6q25.1	protein_coding	0	0	1.37846	3.09224	2.99274	4.16905
Up	ENSG00000121898	2.90777	0.00662	CPXM2	10q26.13	protein_coding	1.37521	1.45159	3.96946	4.30562	4.82832	4.18128
Up	ENSG00000101236	2.90772	0.0343	RNF24	20p13	protein_coding	0.715587	0.588642	3.91336	4.20803	3.7442	2.37377
Up	ENSG00000139117	2.90581	0.0912	CPNE8	12q12	protein_coding	0.615744	1.37031	2.13453	4.07064	4.87322	4.51697
Up	ENSG00000127314	2.90377	0.0304	RAP1B	12q15	protein_coding	3.76266	4.62897	6.34974	6.88882	8.00146	7.15833
Up	ENSG00000156802	2.90349	0.0275	ATAD2	8q24.13	protein_coding	0.301736	0.479759	2.98573	3.34319	2.5603	4.28774
Up	ENSG00000149541	2.90333	0.049	B3GAT3	11q12.3	protein_coding	3.31777	2.92356	7.22449	5.85424	4.93322	6.08403
Up	ENSG00000104324	2.90126	0.0168	CPQ ENSG00000104324	8q22.1	protein_coding	3.00647	2.83853	5.64136	6.68309	5.52146	5.44912
Up	ENSG00000087448	2.90125	0.00576	KLHL42	12p11.22	protein_coding	1.04337	0.840587	3.8652	3.92951	3.38995	4.18826
Up	ENSG00000151882	2.89952	0.0468	CCL28	5p12	protein_coding	0.188854	0	3.73829	3.22316	1.63101	3.38333
Up	ENSG00000278270	2.89819	0.0174	RPS9	CHR_HSCHR19_4_CTG3_1	protein_coding	1.51022	1.76307	4.84907	3.99964	4.08892	5.2017
Up	ENSG00000185338	2.89715	0.0951	SOCS1	16p13.13	protein_coding	1.01035	0.314586	3.14418	4.30361	2.0018	4.78888
Up	ENSG00000136052	2.89585	0.0459	SLC41A2	12q23.3	protein_coding	0.135167	0.257778	2.53932	2.5343	4.4644	2.83127
Up	ENSG00000122417	2.89578	0.0281	ODF2L	1p22.3	protein_coding	2.26715	1.42207	5.01568	5.53421	4.10698	4.30469
Up	ENSG00000215077	2.89569	0.0769	BRD2	CHR_HSCHR6_MHC_QBL_CTG1	protein_coding	5.34257	3.12439	6.69612	7.96203	6.36151	7.49702
Up	ENSG00000219481	2.89409	0.0801	NBPF1	1p36.13	protein_coding	1.63995	1.43157	4.38274	5.42207	2.78177	5.13283
Up	ENSG00000112699	2.89357	0.00533	GMDS	6p25.3	protein_coding	1.97888	2.27738	4.70201	5.38321	4.85655	5.14503
Up	ENSG00000128487	2.89316	0.0253	SPECC1	17p11.2	protein_coding	2.07065	1.75514	5.6009	3.9574	4.61785	5.04806
Up	ENSG00000196968	2.89236	0.0454	FUT11	10q22.2	protein_coding	2.5719	2.49706	6.67514	5.55204	4.64146	4.83872
Up	ENSG00000100490	2.89192	0.0629	CDKL1	14q22.1	protein_coding	1.16941	0.172658	4.87026	3.14383	2.55774	3.68
Up	ENSG00000110400	2.89137	0.0468	NECTIN1	11q23.3	protein_coding	0.967697	0.621237	3.12639	2.70821	4.68611	4.22263
Up	ENSG00000130402	2.89107	0.0192	ACTN4	19q13.2	protein_coding	5.46625	4.6836	8.55643	7.28651	7.8715	8.14952
Up	ENSG00000067992	2.88969	0.036	PDK3	Xp22.11	protein_coding	0.211129	0	3.57041	3.69403	2.81139	1.9052
Up	ENSG00000155304	2.88926	0.0778	HSPA13	21q11.2	protein_coding	0.80677	0.750475	1.94469	4.23535	3.98901	4.50249
Up	ENSG00000127946	2.88906	0.0109	HIP1	7q11.23	protein_coding	1.24069	1.71061	3.80939	4.58972	4.79442	4.2653
Up	ENSG00000114019	2.88865	0.0256	AMOTL2	3q22.2	protein_coding	3.24705	3.03762	5.64512	6.87941	5.29316	6.30627
Up	ENSG00000164402	2.88849	0.0228	SEPTIN8	5q31.1	protein_coding	2.67738	2.42328	5.61261	4.83912	5.00319	6.30035
Up	ENSG00000152518	2.88807	0.0201	ZFP36L2	2p21	protein_coding	3.92482	4.13855	7.85129	6.72268	6.49333	6.6117
Up	ENSG00000090971	2.88769	0.0285	NAT14	19q13.42	protein_coding	2.01457	1.64726	5.55093	4.71176	3.77188	4.83985
Up	ENSG00000162004	2.88735	0.078	CCDC78	16p13.3	protein_coding	0.0417	0.175945	3.59363	2.53111	1.606	4.25395
Up	ENSG00000100075	2.88699	0.0533	SLC25A1	22q11.21	protein_coding	3.59676	3.16042	7.32819	5.973	5.07741	6.68372
Up	ENSG00000134901	2.88636	0.00504	POGLUT2	13q33.1	protein_coding	1.2773	0.846119	3.80138	4.31412	3.94664	3.73015
Up	ENSG00000155366	2.88516	0.0237	RHOC	1p13.2	protein_coding	5.51534	4.9483	8.45767	7.15929	8.31258	8.53838
Up	ENSG00000273136	2.88474	0.0102	NBPF26	1p11.2	protein_coding	1.08428	1.64939	4.36038	4.70841	3.76852	4.16898
Up	ENSG00000241839	2.88424	0.0124	PLEKHO2	15q22.31	protein_coding	1.32912	1.81477	4.86457	4.59183	3.79974	4.5686
Up	ENSG00000087338	2.88265	0.0157	GMCL1	2p13.3	protein_coding	1.15889	1.16967	3.97476	4.36229	3.28921	4.56145
Up	ENSG00000168026	2.88185	0.00997	TTC21A	3p22.2	protein_coding	2.03686	0.982562	4.36637	4.23344	4.52896	4.43747
Up	ENSG00000161647	2.88076	0.0241	MPP3	17q21.31	protein_coding	1.93477	1.33626	5.35233	3.78547	4.51413	4.41319
Up	ENSG00000168476	2.88035	0.0618	REEP4 ENSG00000168476	8p21.3	protein_coding	1.97388	1.29458	5.50763	3.42401	3.88772	5.23896
Up	ENSG00000169919	2.88028	0.0419	GUSB	7q11.21	protein_coding	4.29051	3.39905	7.0263	6.73388	5.62004	7.52003
Up	ENSG00000168778	2.88003	0.0327	TCTN2	12q24.31	protein_coding	0.57536	0.701953	3.47954	4.25177	2.4328	3.91065
Up	ENSG00000198715	2.87981	0.01	GLMP	1q22	protein_coding	2.7308	2.63402	5.1267	5.54151	6.18324	5.39745
Up	ENSG00000137713	2.87842	0.0121	PPP2R1B	11q23.1	protein_coding	0.931	1.15431	4.49449	3.59175	4.14371	3.45435
Up	ENSG00000168005	2.87815	0.0275	SPINDOC	11q13.1	protein_coding	1.71197	2.2178	5.58904	4.4212	4.09461	5.2673
Up	ENSG00000166173	2.87606	0.017	LARP6	15q23	protein_coding	2.96909	2.46507	5.82117	5.04314	5.26381	6.24444
Up	ENSG00000140575	2.87603	0.0223	IQGAP1	15q26.1	protein_coding	4.25338	3.41261	5.93222	6.66796	7.23276	7.00315
Up	ENSG00000072832	2.87403	0.0806	CRMP1	4p16.2	protein_coding	0.783366	0.400383	4.46196	4.49125	2.5523	2.35812
Up	ENSG00000179029	2.87389	0.0464	TMEM107	17p13.1	protein_coding	1.25128	0.451444	4.5337	4.36053	2.73202	3.27476
Up	ENSG00000166888	2.87359	0.0171	STAT6	12q13.3	protein_coding	3.54707	3.05923	6.71407	5.54369	5.89973	6.54946
Up	ENSG00000153404	2.87311	0.0712	PLEKHG4B	5p15.33	protein_coding	0.111837	0.133888	3.22802	3.10312	1.48147	4.17129
Up	ENSG00000205918	2.87198	0.066	PDPK2P	16p13.3	transcribed_unprocessed_pseudogene	0.330898	1.26283	3.25086	3.12656	3.11529	5.18266
Up	ENSG00000131981	2.86942	0.00952	LGALS3	14q22.3	protein_coding	5.23908	4.88286	7.57467	7.60352	8.14656	8.39684
Up	ENSG00000159147	2.86892	0.00388	DONSON	21q22.11	protein_coding	2.51174	2.14015	5.00141	5.07054	5.21635	5.49116
Up	ENSG00000217801	2.8678	0.0118	ENSG00000217801	1p36.33	transcribed_unprocessed_pseudogene	1.58814	1.26275	4.85406	4.47574	3.82857	4.01459
Up	ENSG00000005022	2.86727	0.00706	SLC25A5	Xq24	protein_coding	4.14057	3.87172	6.41732	7.01537	7.25735	6.80361
Up	ENSG00000148426	2.86714	0.0371	PROSER2	10p14	protein_coding	0.66407	0.873659	3.52735	3.15248	3.02596	4.83825
Up	ENSG00000119403	2.86637	0.0184	PHF19	9q33.2	protein_coding	2.52032	2.59038	6.14801	5.04318	4.8258	5.66988
Up	ENSG00000170779	2.86623	0.0176	CDCA4	14q32.33	protein_coding	0.918262	0.882113	3.98519	3.52119	3.09348	4.46581
Up	ENSG00000123136	2.86555	0.041	DDX39A	19p13.12	protein_coding	3.47908	4.16035	6.65643	5.59052	7.5663	6.92781
Up	ENSG00000139318	2.86495	0.0178	DUSP6	12q21.33	protein_coding	1.4576	1.78057	3.92097	4.07047	5.12433	4.82035
Up	ENSG00000125505	2.86476	0.0187	MBOAT7	19q13.42	protein_coding	1.55077	1.20098	5.04495	3.86791	3.73706	4.31261
Up	ENSG00000133703	2.86465	0.0317	KRAS	12p12.1	protein_coding	1.14744	1.49301	3.16395	4.8985	4.06587	4.61117
Up	ENSG00000065621	2.86449	0.0281	GSTO2	10q25.1	protein_coding	1.29673	1.38078	4.87469	4.67486	3.25444	4.00901
Up	ENSG00000072274	2.86435	0.0378	TFRC	3q29	protein_coding	2.60492	2.22621	4.4802	6.39757	4.89605	5.34587
Up	ENSG00000135124	2.86284	0.00846	P2RX4	12q24.31	protein_coding	1.9529	1.07533	4.35578	4.4191	4.12746	4.60548
Up	ENSG00000138448	2.86109	0.0786	ITGAV	2q32.1	protein_coding	2.2906	2.07775	4.33296	6.32016	5.69448	3.83347
Up	ENSG00000170266	2.86004	0.0231	GLB1	3p22.3	protein_coding	2.74817	3.08528	6.18202	5.98932	4.80016	6.13557
Up	ENSG00000157869	2.85762	0.0618	RAB28	4p15.33	protein_coding	1.86439	1.55043	3.98026	5.93946	3.58756	4.75285
Up	ENSG00000206489	2.85669	0.0907	PPP1R10	CHR_HSCHR6_MHC_QBL_CTG1	protein_coding	2.64126	3.01675	5.13041	7.24385	4.3899	5.97866
Up	ENSG00000138674	2.85586	0.00461	SEC31A	4q21.22	protein_coding	4.78462	4.94666	8.07836	7.80293	7.57276	7.43193
Up	ENSG00000267303	2.85392	0.0687		19p13.2	protein_coding	1.45202	0.401734	4.40915	2.45328	4.69137	3.56937
Up	ENSG00000079101	2.85288	0.0356	CLUL1	18p11.32	protein_coding	0	0	3.81209	2.80697	1.82939	2.96305
Up	ENSG00000125629	2.84925	0.0399	INSIG2	2q14.1	protein_coding	2.24002	2.3726	5.325	5.42859	3.94179	5.92685
Up	ENSG00000172232	2.84375	0.0906	AZU1	19p13.3	protein_coding	0.0790005	0	1.56753	2.10928	3.9827	3.87347
Up	ENSG00000134109	2.84353	0.0226	EDEM1	3p26.1	protein_coding	1.13003	1.30235	4.9222	4.04361	3.93817	3.33493
Up	ENSG00000148840	2.8417	0.0109	PPRC1 ENSG00000148840	10q24.32	protein_coding	2.70106	3.47028	5.65998	5.81202	6.41823	5.81923
Up	ENSG00000185567	2.84021	0.0881	AHNAK2	14q32.33	protein_coding	0.649093	0.455475	4.72689	2.23615	4.09596	2.51096
Up	ENSG00000223953	2.83536	0.0683	C1QTNF5	11q23.3	protein_coding	3.13994	2.63846	5.87589	4.78909	7.16087	5.0724
Up	ENSG00000180773	2.83488	0.0556	SLC36A4	11q21	protein_coding	0.66658	0.69966	3.92558	4.68452	2.48149	2.98041
Up	ENSG00000114446	2.83422	0.00439	IFT57 ENSG00000114446	3q13.13	protein_coding	1.64924	2.04625	4.55555	4.91537	4.43202	4.82493
Up	ENSG00000140688	2.83329	0.0271	RUSF1	16p11.2	protein_coding	3.59683	3.32406	7.00181	6.40408	5.32056	6.44848
Up	ENSG00000100994	2.83314	0.0241	PYGB	20p11.21	protein_coding	2.94796	3.3532	6.84617	5.31311	5.69423	6.0814
Up	ENSG00000153317	2.83202	0.0214	ASAP1	8q24.22	protein_coding	2.06144	1.76865	4.7107	4.08778	5.59734	4.59246
Up	ENSG00000204764	2.83093	0.0406	RANBP17	5q35.1	protein_coding	0.953928	0.341785	4.4193	3.80705	3.16706	2.52173
Up	ENSG00000196338	2.8301	0.0712	NLGN3	Xq13.1	protein_coding	0.294717	0.170315	2.99006	4.47241	1.78747	3.00054
Up	ENSG00000067900	2.82985	0.00512	ROCK1 ENSG00000067900	18q11.1	protein_coding	2.19135	1.92051	4.97124	5.25263	4.71188	4.60735
Up	ENSG00000167595	2.82973	0.0961	PROSER3 ENSG00000167595	19q13.12	protein_coding	1.83878	1.43718	5.9708	3.88958	3.1075	4.90295
Up	ENSG00000116560	2.82969	0.0241	SFPQ	1p34.3	protein_coding	5.79847	6.13095	8.27947	9.13383	9.55845	8.20585
Up	ENSG00000082153	2.82952	0.0556	BZW1	2q33.1	protein_coding	3.80184	4.24767	5.44461	7.62344	7.15989	7.18914
Up	ENSG00000111348	2.82939	0.0256	ARHGDIB	12p12.3	protein_coding	4.62141	4.25242	6.80235	8.09399	6.63269	7.53619
Up	ENSG00000109089	2.82909	0.0495	CDR2L	17q25.1	protein_coding	1.15517	0.443595	4.67153	3.06156	4.03995	2.74084
Up	ENSG00000172893	2.82892	0.0926	DHCR7	11q13.4	protein_coding	1.69434	2.51086	4.51699	4.45954	4.06343	6.68614
Up	ENSG00000132254	2.82881	0.0333	ARFIP2	11p15.4	protein_coding	3.14296	3.54659	6.68386	6.80979	5.1364	6.06427
Up	ENSG00000205581	2.82833	0.0118	HMGN1	21q22.2	protein_coding	4.21375	3.83207	6.66964	6.74052	6.49217	7.50262
Up	ENSG00000170348	2.82657	0.0533	TMED10	14q24.3	protein_coding	4.21507	5.38394	7.43763	8.7789	6.78292	7.50485
Up	ENSG00000151503	2.82595	0.0215	NCAPD3	11q25	protein_coding	1.71875	1.41445	4.92807	4.51188	3.48944	4.64081
Up	ENSG00000165244	2.8255	0.0142	ZNF367	9q22.32	protein_coding	0.639146	0.31172	3.2533	3.74556	2.61083	3.59405
Up	ENSG00000101160	2.82521	0.00846	CTSZ	20q13.32	protein_coding	4.66085	5.20627	8.06687	7.7972	7.88573	7.28526
Up	ENSG00000240694	2.82475	0.015	PNMA2	8p21.2	protein_coding	0.394612	0	3.34895	3.54686	2.45758	2.73484
Up	ENSG00000197183	2.82405	0.0223	NOL4L	20q11.21	protein_coding	0.75805	0.714446	3.31235	2.91403	3.56984	4.44499
Up	ENSG00000121297	2.82345	0.0447	TSHZ3	19q12	protein_coding	0.521021	0.687524	3.61343	3.2745	4.48353	2.33945
Up	ENSG00000135931	2.82302	0.0509	ARMC9	2q37.1	protein_coding	1.40998	0.776751	4.8465	3.68696	4.37283	2.75924
Up	ENSG00000141519	2.82267	0.0859	CCDC40	17q25.3	protein_coding	1.42721	0.452896	4.77579	4.40439	3.62904	2.24168
Up	ENSG00000106723	2.82182	0.0295	SPIN1	9q22.1	protein_coding	1.76821	1.38099	4.73997	4.71417	4.81912	3.3124
Up	ENSG00000169679	2.8211	0.0536	BUB1	2q13	protein_coding	0.101608	0.231903	3.22679	2.71211	1.85966	4.15286
Up	ENSG00000178202	2.81943	0.0542	POGLUT3	11q22.3	protein_coding	2.08267	1.69512	5.10199	5.84129	4.18916	3.70086
Up	ENSG00000110906	2.81874	0.0228	KCTD10	12q24.11	protein_coding	2.86526	2.02583	5.42853	4.7305	4.92474	5.97338
Up	ENSG00000156127	2.81867	0.0356	BATF	14q24.3	protein_coding	0	0.316539	3.95242	2.50519	3.26474	2.18543
Up	ENSG00000110841	2.81679	0.0449	PPFIBP1	12p11.23	protein_coding	2.57447	3.02955	6.75447	5.72924	4.68365	5.30781
Up	ENSG00000171700	2.81522	0.0449	RGS19	20q13.33	protein_coding	1.15852	1.10234	4.6601	3.11807	3.23712	4.76731
Up	ENSG00000215915	2.81477	0.0225	ATAD3C ENSG00000215915	1p36.33	protein_coding	0.135373	0.418872	3.59829	3.57347	2.24529	2.95054
Up	ENSG00000012983	2.811	0.0182	MAP4K5	14q22.1	protein_coding	2.15816	2.25135	4.30382	5.55919	5.42599	4.77404
Up	ENSG00000074696	2.80953	0.0104	HACD3	15q22.31	protein_coding	1.89479	1.91309	4.38826	5.16942	4.28215	5.01406
Up	ENSG00000170421	2.80903	0.038	KRT8	12q13.13	protein_coding	0.744103	0.133937	2.59668	2.84314	3.18282	4.36956
Up	ENSG00000154920	2.80876	0.027	EME1	17q21.33	protein_coding	0.257812	0.487383	3.22294	3.31129	2.25074	3.94046
Up	ENSG00000177830	2.80816	0.0685	CHID1	11p15.5	protein_coding	4.50075	4.34847	7.88226	8.37792	6.1145	6.5564
Up	ENSG00000138069	2.8077	0.00644	RAB1A	2p14	protein_coding	4.55364	4.58488	7.14098	7.02436	7.72209	7.62043
Up	ENSG00000181938	2.80768	0.023	GINS3	16q21	protein_coding	0.950596	0.956602	3.58124	2.91055	4.2613	4.29203
Up	ENSG00000143429	2.80754	0.0928	LSP1P4	2p11.2	transcribed_unprocessed_pseudogene	0.555055	1.43519	2.44716	3.34741	5.17172	4.24435
Up	ENSG00000198380	2.80696	0.0141	GFPT1	2p13.3	protein_coding	1.78252	1.78717	4.44479	4.90157	3.93312	5.08776
Up	ENSG00000127990	2.80639	0.0425	SGCE	7q21.3	protein_coding	2.86884	2.96688	4.45451	6.14711	5.94149	6.3539
Up	ENSG00000130313	2.80408	0.035	PGLS	19p13.11	protein_coding	3.6507	3.36033	7.41544	5.69154	6.29733	5.83406
Up	ENSG00000129083	2.80311	0.0229	COPB1	11p15.2	protein_coding	3.27257	3.56863	5.80204	7.17223	5.85819	6.06238
Up	ENSG00000111145	2.80304	0.0625	ELK3	12q23.1	protein_coding	2.0655	1.41024	4.0347	3.56763	5.85481	4.7065
Up	ENSG00000148737	2.80137	0.0101	TCF7L2	10q25.2	protein_coding	2.11221	1.80462	5.12632	5.10424	4.3151	4.49351
Up	ENSG00000142731	2.8008	0.0257	PLK4	4q28.1	protein_coding	0	0	2.28522	3.05894	2.20379	3.65526
Up	ENSG00000117676	2.80017	0.0361	RPS6KA1	1p36.11	protein_coding	0.307096	1.2525	4.0778	3.84631	2.53263	3.86315
Up	ENSG00000091317	2.7996	0.0577	CMTM6	3p22.3	protein_coding	1.2842	1.42238	2.80204	4.04612	4.80268	4.9607
Up	ENSG00000116793	2.7994	0.00351	PHTF1	1p13.2	protein_coding	1.66707	1.725	4.63449	4.46233	4.1859	4.69904
Up	ENSG00000174705	2.79872	0.0458	SH3PXD2B	5q35.1	protein_coding	0.567762	1.51188	3.99116	2.99286	4.88011	3.49003
Up	ENSG00000181789	2.79853	0.00893	COPG1	3q21.3	protein_coding	4.68208	4.54508	7.61197	7.29648	6.90498	7.83503
Up	ENSG00000167994	2.79536	0.0182	RAB3IL1	11q12.3	protein_coding	2.14721	1.6764	5.50791	4.58175	4.25267	4.48636
Up	ENSG00000099814	2.79501	0.0338	CEP170B	14q32.33	protein_coding	1.68507	1.92137	5.67262	3.97799	4.63491	4.1074
Up	ENSG00000165609	2.79397	0.00809	NUDT5	10p14	protein_coding	1.82371	1.86568	4.19525	5.05915	4.45099	4.84927
Up	ENSG00000170921	2.79352	0.059	TANC2	17q23.2	protein_coding	0.588933	0.93929	2.40979	4.11952	3.10241	4.59881
Up	ENSG00000273633	2.79324	0.0892	CDC42EP5	CHR_HSCHR19LRC_COX1_CTG3_1	protein_coding	2.70006	1.79464	5.44876	3.6728	4.6867	6.35409
Up	ENSG00000068724	2.79269	0.0234	TTC7A	2p21	protein_coding	2.13679	1.0075	4.72357	3.68007	4.57176	4.48394
Up	ENSG00000112972	2.79267	0.00706	HMGCS1	5p12	protein_coding	2.71443	2.28121	5.10536	5.25817	5.05661	5.74183
Up	ENSG00000165661	2.79257	0.0286	QSOX2	9q34.3	protein_coding	0.986636	1.20054	3.8864	4.47446	2.87794	4.30583
Up	ENSG00000172780	2.79196	0.00373	RAB43	3q21.3	protein_coding	0.974325	1.46744	3.9735	3.87549	4.19632	4.00605
Up	ENSG00000285277	2.79107	0.00969		CHR_HG708_PATCH	transcribed_unprocessed_pseudogene	0.122181	0.315301	3.17287	2.657	2.68779	3.5216
Up	ENSG00000134853	2.79048	0.0354	PDGFRA	4q12	protein_coding	2.03649	1.7316	4.18228	5.05603	5.57584	3.88397
Up	ENSG00000187164	2.78652	0.0119	SHTN1	10q25.3	protein_coding	0.369536	0.418105	3.38383	3.25561	2.5056	3.5763
Up	ENSG00000145882	2.78644	0.0841	PCYOX1L	5q32	protein_coding	1.08024	0.32209	4.05824	4.51425	1.94384	3.43412
Up	ENSG00000145824	2.7863	0.0644	CXCL14	5q31.1	protein_coding	5.66292	5.53334	7.44116	8.63638	9.73485	7.72531
Up	ENSG00000052850	2.78521	0.095	ALX4	11p11.2	protein_coding	0.0634546	0	3.26988	3.87458	1.04932	3.07398
Up	ENSG00000215154	2.7851	0.0466		16p13.3	transcribed_unprocessed_pseudogene	0.760232	1.29595	4.11804	2.81469	3.47533	4.84469
Up	ENSG00000117632	2.78454	0.0344	STMN1	1p36.11	protein_coding	3.6948	3.80659	6.99124	6.99107	5.37707	6.78158
Up	ENSG00000159063	2.78191	0.0173	ALG8	11q14.1	protein_coding	2.55158	2.71324	5.94547	5.50083	4.62014	5.59086
Up	ENSG00000168060	2.78178	0.0643	NAALADL1	11q13.1	protein_coding	1.52395	0.883949	4.47591	4.71767	2.51533	4.234
Up	ENSG00000186395	2.7811	0.00135	KRT10 ENSG00000186395	17q21.2	protein_coding	3.56418	3.49471	6.26724	6.34207	6.24794	6.38494
Up	ENSG00000114850	2.77795	0.021	SSR3	3q25.31	protein_coding	4.23798	4.50554	6.3543	7.75754	7.02462	7.46236
Up	ENSG00000115750	2.7774	0.0436	TAF1B	2p25.1	protein_coding	1.18993	1.05316	3.6596	3.995	2.93421	5.00697
Up	ENSG00000184428	2.77408	0.0201	TOP1MT	8q24.3	protein_coding	1.89923	2.20626	5.33081	4.24572	4.38321	5.34758
Up	ENSG00000262795	2.77292	0.0338	IFNGR2	CHR_HSCHR21_4_CTG1_1	protein_coding	2.70059	3.46783	5.51903	6.13234	6.69138	5.08575
Up	ENSG00000079819	2.76983	0.00996	EPB41L2	6q23.2	protein_coding	4.1262	3.34391	6.85252	6.39298	6.19059	6.58345
Up	ENSG00000105438	2.76811	0.0138	KDELR1 ENSG00000105438	19q13.33	protein_coding	5.09046	5.59457	8.66848	7.89192	7.61866	8.26341
Up	ENSG00000134294	2.76682	0.0598	SLC38A2	12q13.11	protein_coding	5.03888	4.64897	6.41214	8.8002	7.74774	7.4829
Up	ENSG00000016864	2.76621	0.00484	GLT8D1	3p21.1	protein_coding	3.71885	3.65297	6.33316	6.31818	6.27848	6.87865
Up	ENSG00000114353	2.76411	0.00952	GNAI2	3p21.31	protein_coding	5.49735	5.18136	8.59812	7.84864	7.73535	8.23176
Up	ENSG00000119977	2.76344	0.0233	TCTN3	10q24.1	protein_coding	1.64077	2.22882	4.72796	5.53149	4.35565	4.17783
Up	ENSG00000120889	2.76149	0.0337	TNFRSF10B	8p21.3	protein_coding	2.40674	2.56665	5.32922	5.09237	6.20992	4.36121
Up	ENSG00000141543	2.7611	0.0806	EIF4A3	17q25.3	protein_coding	4.08579	4.15705	5.76083	7.13536	8.35262	6.28128
Up	ENSG00000132793	2.76109	0.0575	LPIN3	20q12	protein_coding	1.53101	1.43093	5.50127	3.40098	3.56357	4.50243
Up	ENSG00000077147	2.76107	0.0273	TM9SF3	10q24.1	protein_coding	2.59753	2.88963	4.97678	6.51137	5.23916	5.2913
Up	ENSG00000150593	2.75992	0.0406	PDCD4	10q25.2	protein_coding	3.63006	3.45448	5.37097	7.08196	5.84239	6.91343
Up	ENSG00000134490	2.7586	0.00369	TMEM241	18q11.2	protein_coding	0.552259	0.814695	3.73691	3.24996	3.38064	3.40081
Up	ENSG00000173653	2.75665	0.0223	RCE1	11q13.2	protein_coding	3.07299	2.12186	4.80116	5.1264	5.53756	5.95118
Up	ENSG00000141959	2.75619	0.0325	PFKL	21q22.3	protein_coding	3.78977	4.01109	7.53843	6.25229	5.86159	6.97417
Up	ENSG00000150051	2.75612	0.0871	MKX	10p12.1	protein_coding	0.101483	0	2.72758	3.61827	1.18398	3.69761
Up	ENSG00000166839	2.75541	0.0536	ANKDD1A	15q22.31	protein_coding	1.85308	0.975921	5.37636	3.82698	3.34583	4.13048
Up	ENSG00000157554	2.75522	0.00807	ERG	21q22.2	protein_coding	1.95791	2.27892	4.83836	4.40258	4.99633	5.25726
Up	ENSG00000170549	2.75456	0.00764	IRX1	5p15.33	protein_coding	0	0	2.58511	2.34483	2.89084	3.19747
Up	ENSG00000101773	2.75419	0.0966	RBBP8	18q11.2	protein_coding	1.03705	1.28379	2.61237	3.15573	5.11804	4.77229
Up	ENSG00000168546	2.75403	0.062	GFRA2	8p21.3	protein_coding	0.410717	0.282443	4.43395	2.8991	2.00028	3.06909
Up	ENSG00000182197	2.75267	0.0956	EXT1	8q24.11	protein_coding	1.5904	1.94139	3.8031	3.24806	5.88196	5.14112
Up	ENSG00000148429	2.74981	0.0771	USP6NL	10p14	protein_coding	0.345489	0.631456	3.30695	4.71251	2.10815	2.82552
Up	ENSG00000087053	2.74836	0.0291	MTMR2	11q21	protein_coding	1.84532	1.68113	4.57508	5.49305	3.95739	4.02082
Up	ENSG00000066336	2.74541	0.0295	SPI1	11p11.2	protein_coding	2.15181	1.61717	4.10397	3.97658	5.29962	5.13942
Up	ENSG00000196776	2.74498	0.0331	CD47	3q13.12	protein_coding	1.93206	2.82219	4.75527	5.70313	5.6557	4.37431
Up	ENSG00000077585	2.74023	0.0257	GPR137B	1q42.3	protein_coding	2.63255	1.99485	4.25312	5.46911	4.88502	5.60845
Up	ENSG00000026652	2.73932	0.0315	AGPAT4	6q26	protein_coding	0.333419	0.362425	2.19988	2.85373	3.93297	3.36239
Up	ENSG00000141522	2.73831	0.0262	ARHGDIA	17q25.3	protein_coding	5.44116	5.73467	9.29237	7.92416	8.23394	7.85443
Up	ENSG00000111247	2.73584	0.0552	RAD51AP1	12p13.32	protein_coding	0.338167	0.196628	2.33541	3.07131	2.29716	4.30908
Up	ENSG00000182220	2.73574	0.0227	ATP6AP2	Xp11.4	protein_coding	3.37722	3.19024	5.09501	6.17624	6.45409	6.35255
Up	ENSG00000197694	2.73541	0.0476	SPTAN1	9q34.11	protein_coding	4.97878	4.22541	7.52623	6.12897	8.02697	7.66785
Up	ENSG00000170955	2.73506	0.0471	CAVIN3	11p15.4	protein_coding	4.37627	3.91446	8.14586	6.25636	6.70719	6.41228
Up	ENSG00000157399	2.73499	0.015	ARSL	Xp22.33	protein_coding	0	0	2.71379	3.20587	2.02335	2.99693
Up	ENSG00000145860	2.73496	0.0105	RNF145	5q33.3	protein_coding	2.93419	2.54224	4.92286	5.61712	5.86743	5.48528
Up	ENSG00000077150	2.7344	0.0561	NFKB2	10q24.32	protein_coding	3.24502	3.39746	5.93406	5.99439	7.29946	4.99465
Up	ENSG00000167173	2.73424	0.0358	C15orf39	15q24.2	protein_coding	0.763378	1.35717	4.22413	2.72728	4.35658	3.87005
Up	ENSG00000177879	2.73408	0.0401	AP3S1	5q22.3	protein_coding	3.11996	3.7391	5.05694	6.19998	6.78293	6.61457
Up	ENSG00000206053	2.73288	0.0758	JPT2	16p13.3	protein_coding	2.33193	2.61377	5.46065	5.67254	3.62549	6.06422
Up	ENSG00000129351	2.72982	0.00799	ILF3	19p13.2	protein_coding	5.1949	5.6784	8.23029	8.02278	7.83372	8.57909
Up	ENSG00000182378	2.72698	0.0621	PLCXD1	Xp22.33	protein_coding	1.13956	1.62222	4.89782	2.88704	4.89653	3.7501
Up	ENSG00000140650	2.72555	0.0211	PMM2	16p13.2	protein_coding	2.43911	3.44141	5.55315	5.25327	5.55022	6.30656
Up	ENSG00000105971	2.72544	0.0389	CAV2	7q31.2	protein_coding	2.71322	2.36317	5.08119	6.37322	5.10802	4.49212
Up	ENSG00000071967	2.72463	0.07	CYBRD1	2q31.1	protein_coding	3.00183	3.09549	5.65367	6.54491	6.55997	4.33462
Up	ENSG00000021762	2.72448	0.049	OSBPL5	11p15.4	protein_coding	2.87741	3.04561	6.97717	4.94294	5.3243	5.49956
Up	ENSG00000284792	2.72436	0.0164	PTEN	CHR_HG2334_PATCH	protein_coding	1.07942	1.39547	3.82916	4.73106	3.64405	3.64293
Up	ENSG00000138623	2.72427	0.0214	SEMA7A	15q24.1	protein_coding	0.634774	0.844167	4.09521	2.68798	3.74953	3.32223
Up	ENSG00000139921	2.72368	0.0575	TMX1	14q22.1	protein_coding	1.51762	1.93244	3.46869	5.43696	3.84233	5.04688
Up	ENSG00000101447	2.72283	0.0417	FAM83D	20q11.23	protein_coding	0	0.0607322	3.07878	2.58617	1.69448	3.65336
Up	ENSG00000117899	2.72265	0.0127	MESD	15q25.1	protein_coding	2.05331	1.39016	4.38957	4.68482	3.92231	4.78084
Up	ENSG00000133216	2.72226	0.0405	EPHB2	1p36.12	protein_coding	0.0334195	0.248558	3.51302	1.67969	3.23669	3.02358
Up	ENSG00000174791	2.72075	0.0874	RIN1	11q13.2	protein_coding	2.5906	1.66314	6.27082	3.6264	4.61416	4.87912
Up	ENSG00000141505	2.71965	0.00617	ASGR1	17p13.1	protein_coding	0.302578	0.174911	3.05218	2.7742	3.3652	2.642
Up	ENSG00000128228	2.71882	0.00554	SDF2L1	22q11.21	protein_coding	2.61278	2.85714	5.31289	5.20331	5.43539	5.86351
Up	ENSG00000104064	2.71856	0.0929	GABPB1 ENSG00000104064	15q21.2	protein_coding	1.58679	1.84032	3.13344	3.99537	5.93416	4.66548
Up	ENSG00000173540	2.71823	0.0573	GMPPB	3p21.31	protein_coding	2.55664	2.32083	5.64103	4.92216	3.9427	6.12197
Up	ENSG00000138821	2.71803	0.0268	SLC39A8	4q24	protein_coding	0.822804	0.749419	2.93368	4.40422	3.64453	3.03416
Up	ENSG00000221968	2.71766	0.0585	FADS3 ENSG00000221968	11q12.2	protein_coding	4.84411	3.17811	7.71149	6.36741	6.18593	6.65024
Up	ENSG00000163938	2.71762	0.0141	GNL3	3p21.1	protein_coding	4.07102	4.60921	6.54649	6.88928	7.21058	7.58459
Up	ENSG00000185112	2.71756	0.0317	FAM43A	3q29	protein_coding	3.07541	1.72528	4.53658	4.90082	5.51703	5.51719
Up	ENSG00000196155	2.7169	0.0806	PLEKHG4	16q22.1	protein_coding	2.33219	0.604241	5.34724	4.03766	4.08948	3.26609
Up	ENSG00000159176	2.71578	0.0152	CSRP1	1q32.1	protein_coding	4.78447	3.77439	7.28947	6.78188	6.68054	7.22896
Up	ENSG00000163040	2.71491	0.0557	CCDC74A	2q21.1	protein_coding	0.845163	0.728995	4.77168	3.45909	3.26089	2.5163
Up	ENSG00000077063	2.71433	0.0716	CTTNBP2	7q31.31	protein_coding	0.395301	0.342401	3.93408	3.06145	1.60327	3.73393
Up	ENSG00000137478	2.71368	0.0228	FCHSD2	11q13.4	protein_coding	2.5013	2.30591	5.61757	5.51872	4.25338	5.07947
Up	ENSG00000132004	2.71274	0.0555	FBXW9	19p13.13	protein_coding	0.976157	0.790586	4.44768	3.18695	2.47336	4.27644
Up	ENSG00000163393	2.71061	0.00858	SLC22A15	1p13.1	protein_coding	0.221863	0.0856204	2.85237	2.66931	2.53567	3.40006
Up	ENSG00000104805	2.71034	0.0584	NUCB1	19q13.33	protein_coding	5.97253	6.74002	10.3298	9.1009	8.29468	8.54109
Up	ENSG00000169641	2.70717	0.0166	LUZP1 ENSG00000169641	1p36.12	protein_coding	0.550386	0.824169	2.69133	3.89254	3.66488	3.32905
Up	ENSG00000263535	2.70664	0.0256	AK4P1	17q11.2	processed_pseudogene	0	0	2.13098	3.39694	2.15181	3.14683
Up	ENSG00000025796	2.70577	0.00794	SEC63	6q21	protein_coding	2.86948	2.74987	5.39632	5.04999	5.82972	5.78576
Up	ENSG00000165533	2.70489	0.0789	TTC8 ENSG00000165533	14q31.3	protein_coding	1.18737	0.47733	3.73559	4.9462	2.88842	2.57876
Up	ENSG00000147065	2.70418	0.0164	MSN	Xq12	protein_coding	4.0963	4.0687	6.62842	6.26473	7.52284	6.73074
Up	ENSG00000264981	2.70387	0.0984	NA	NANA	NA	0.744668	0	3.90077	1.78148	2.40413	4.21845
Up	ENSG00000154134	2.70165	0.0428	ROBO3	11q24.2	protein_coding	2.59596	1.7288	5.36216	4.02921	4.44181	5.62295
Up	ENSG00000075142	2.69841	0.0273	SRI	7q21.12	protein_coding	4.20962	4.01237	6.28092	6.38305	6.81497	7.75872
Up	ENSG00000182796	2.69765	0.0283	TMEM198B	12q13.2	transcribed_unitary_pseudogene	2.93841	2.56339	6.38009	4.81782	5.14017	5.45611
Up	ENSG00000100526	2.69698	0.0223	CDKN3 ENSG00000100526	14q22.2	protein_coding	0.497531	1.41499	3.00728	3.61052	3.8185	4.17666
Up	ENSG00000075624	2.69653	0.0603	ACTB	7p22.1	protein_coding	8.36776	8.06507	11.1669	9.48967	11.4291	11.5661
Up	ENSG00000115091	2.6958	0.03	ACTR3	2q14.1	protein_coding	3.1895	3.43278	5.293	6.05065	5.72952	6.95456
Up	ENSG00000180801	2.69571	0.0275	ARSJ	4q26	protein_coding	0.389772	1.10601	3.53726	4.16619	2.66671	3.40423
Up	ENSG00000140368	2.69555	0.00747	PSTPIP1	15q24.3	protein_coding	1.45761	1.0957	3.9081	4.3309	3.5655	4.08433
Up	ENSG00000107789	2.69352	0.014	MINPP1	10q23.2	protein_coding	1.60782	1.57081	3.85768	4.91757	3.94575	4.41032
Up	ENSG00000147180	2.69143	0.0603	ZNF711	Xq21.1	protein_coding	0.0891835	0.129638	2.55203	4.05533	1.71432	2.88169
Up	ENSG00000179833	2.69097	0.0789	SERTAD2	2p14	protein_coding	2.48289	1.99188	4.02743	4.65858	6.4848	4.5426
Up	ENSG00000074695	2.69067	0.0256	LMAN1	18q21.32	protein_coding	3.14565	3.36916	5.26334	6.60344	5.53301	6.39253
Up	ENSG00000095139	2.69063	0.0168	ARCN1	11q23.3	protein_coding	3.80842	4.30058	6.26038	7.12841	6.38043	7.21128
Up	ENSG00000269113	2.69063	0.0571	TRABD2B	1p33	protein_coding	0.51714	0.777073	3.83285	4.3552	2.27028	2.8926
Up	ENSG00000103490	2.69033	0.0789	PYCARD	16p11.2	protein_coding	1.54697	1.01481	4.79505	4.1785	4.50024	2.41108
Up	ENSG00000163689	2.69014	0.0285	CFAP20DC	3p14.2	protein_coding	0.0438624	0.049055	3.37691	3.0899	1.78891	2.69068
Up	ENSG00000205129	2.6897	0.0698	C4orf47	4q35.1	protein_coding	0	0	3.62778	3.51725	1.60066	2.0131
Up	ENSG00000081320	2.68826	0.00777	STK17B	2q32.3	protein_coding	0.435881	0.642392	2.74692	3.46494	3.51261	3.18512
Up	ENSG00000278372	2.68759	0.0615	MYO19	CHR_HSCHR17_7_CTG4	protein_coding	3.66126	2.77472	6.47419	5.11978	5.14688	6.88144
Up	ENSG00000118402	2.68751	0.0337	ELOVL4	6q14.1	protein_coding	0	0.0910282	2.88864	3.51068	1.72378	2.809
Up	ENSG00000105810	2.68584	0.0138	CDK6	7q21.2	protein_coding	0.679928	0.311557	3.3378	3.75886	2.86835	2.76132
Up	ENSG00000121653	2.68539	0.0275	MAPK8IP1	11p11.2	protein_coding	1.51103	0.540631	4.17313	3.61104	4.08732	2.97339
Up	ENSG00000196628	2.68432	0.00471	TCF4	18q21.2	protein_coding	2.54333	2.19094	4.91806	5.39095	4.92093	4.97587
Up	ENSG00000114554	2.6837	0.0588	PLXNA1	3q21.3	protein_coding	2.79123	2.67242	5.69787	4.53186	4.7978	6.63462
Up	ENSG00000163902	2.68342	0.0228	RPN1 ENSG00000163902	3q21.3	protein_coding	4.53819	5.08854	6.83058	7.41529	7.5039	8.23737
Up	ENSG00000048342	2.6822	0.0211	CC2D2A	4p15.32	protein_coding	1.05209	1.84628	4.69025	4.38576	3.57011	3.87945
Up	ENSG00000081059	2.68053	0.0553	TCF7 ENSG00000081059	5q31.1	protein_coding	0.482726	0.828138	3.24511	2.13111	4.29974	3.6679
Up	ENSG00000149483	2.67803	0.0178	TMEM138	11q12.2	protein_coding	2.33325	2.8156	5.77259	4.99266	4.66205	5.58254
Up	ENSG00000185340	2.67612	0.0873	GAS2L1 ENSG00000185340	22q12.2	protein_coding	1.88649	2.12649	5.6866	3.2469	4.31852	5.47843
Up	ENSG00000164244	2.6754	0.0194	PRRC1	5q23.2	protein_coding	2.17889	2.30513	4.73655	5.73898	4.42048	4.77366
Up	ENSG00000177943	2.67539	0.0808	MAMDC4	9q34.3	protein_coding	2.23379	1.11621	5.40584	3.77555	3.26563	4.95456
Up	ENSG00000100592	2.67539	0.0832	DAAM1	14q23.1	protein_coding	1.1512	0.976338	4.15551	5.1142	2.77646	2.91045
Up	ENSG00000161999	2.67401	0.039	JMJD8	16p13.3	protein_coding	3.52207	3.95368	6.96863	6.90362	5.30527	6.47003
Up	ENSG00000136379	2.67319	0.0106	ABHD17C	15q25.1	protein_coding	0.508284	0.378486	3.0898	2.96488	3.69771	2.71393
Up	ENSG00000163683	2.67239	0.00892	SMIM14	4p14	protein_coding	1.43892	1.95496	4.19649	4.79157	4.43035	4.05894
Up	ENSG00000184575	2.67067	0.0346	XPOT	12q14.2	protein_coding	2.5051	2.70657	4.92363	5.20014	4.6448	6.33745
Up	ENSG00000196262	2.66932	0.0193	PPIA	7p13	protein_coding	7.39985	7.52924	9.41697	9.97492	10.7137	10.4298
Up	ENSG00000169105	2.66796	0.027	CHST14	15q15.1	protein_coding	1.91348	2.00231	5.21356	5.18765	3.99513	4.10709
Up	ENSG00000096092	2.66572	0.0314	TMEM14A	6p12.2	protein_coding	1.5148	0.786057	2.93838	3.71578	4.37258	4.23786
Up	ENSG00000133121	2.66408	0.0583	STARD13	13q13.1	protein_coding	1.5201	1.39541	3.85254	4.69131	5.02322	2.92028
Up	ENSG00000112837	2.66381	0.05	TBX18	6q14.3	protein_coding	0.574952	0.0432325	3.80905	3.46023	1.88021	2.7421
Up	ENSG00000118707	2.66178	0.0267	TGIF2	20q11.23	protein_coding	0.935414	1.04897	2.93052	3.50754	3.65182	4.52601
Up	ENSG00000197930	2.66153	0.0136	ERO1A ENSG00000197930	14q22.1	protein_coding	1.56137	2.26897	4.03768	4.8129	4.60286	4.85334
Up	ENSG00000175265	2.66145	0.0602	GOLGA8A	15q14	protein_coding	3.23246	2.54804	6.27666	4.47492	5.10754	6.34767
Up	ENSG00000070761	2.66134	0.0647	CFAP20	16q21	protein_coding	2.93728	2.62211	4.32085	6.43653	4.94015	6.0666
Up	ENSG00000111786	2.6609	0.0222	SRSF9	12q24.31	protein_coding	4.67822	4.12464	6.73329	6.83428	6.77894	7.90281
Up	ENSG00000173230	2.66069	0.00992	GOLGB1	3q13.33	protein_coding	2.29879	2.44295	5.10738	5.22019	4.45025	5.34844
Up	ENSG00000235222	2.6606	0.0778	MSH5	CHR_HSCHR6_MHC_COX_CTG1	protein_coding	0	0.617821	3.81519	1.79944	2.38356	3.87985
Up	ENSG00000100926	2.66015	0.0157	TM9SF1	14q12	protein_coding	2.58876	3.4386	5.88869	6.07044	5.25058	5.48562
Up	ENSG00000085449	2.65958	0.0211	WDFY1	2q36.1	protein_coding	2.15698	2.11768	5.32441	4.27249	5.29209	4.29864
Up	ENSG00000072042	2.6595	0.00576	RDH11	14q24.1	protein_coding	1.9675	1.94693	4.40475	4.92021	4.31232	4.8296
Up	ENSG00000113504	2.65653	0.0132	SLC12A7	5p15.33	protein_coding	0.50149	1.27597	3.65616	3.71443	3.77298	3.03748
Up	ENSG00000125753	2.65599	0.036	VASP	19q13.32	protein_coding	3.6686	3.17039	6.13386	5.19685	5.99383	6.97737
Up	ENSG00000152558	2.65574	0.0375	TMEM123	11q22.2	protein_coding	2.87133	3.17428	4.89753	6.71591	5.44629	5.65446
Up	ENSG00000165323	2.65453	0.086	FAT3	11q14.3	protein_coding	0.0154862	0.0673937	4.07668	2.18382	1.48788	3.03548
Up	ENSG00000104093	2.65361	0.00892	DMXL2	15q21.2	protein_coding	1.08378	1.65459	3.77296	4.02113	3.85161	4.44547
Up	ENSG00000147955	2.65289	0.0571	SIGMAR1	9p13.3	protein_coding	3.41837	2.71007	6.12403	5.85324	4.44711	6.44408
Up	ENSG00000141526	2.65214	0.0422	SLC16A3	17q25.3	protein_coding	4.58146	4.74179	8.00333	7.47479	6.14804	7.6289
Up	ENSG00000112139	2.65012	0.0881	MDGA1	6p21.2	protein_coding	1.3496	1.19697	3.39299	3.81808	5.52812	2.95443
Up	ENSG00000115163	2.6491	0.062	CENPA	2p23.3	protein_coding	0	0.129528	3.09439	2.20414	1.68749	3.86945
Up	ENSG00000160691	2.64875	0.0202	SHC1	1q21.3	protein_coding	4.19498	4.79329	7.86401	7.01685	6.60913	7.08153
Up	ENSG00000078369	2.64823	0.00439	GNB1	1p36.33	protein_coding	4.44577	4.34381	7.17517	7.00005	7.28012	6.71673
Up	ENSG00000162695	2.64786	0.0241	SLC30A7	1p21.2	protein_coding	0.748857	0.33648	2.31047	3.68489	3.33029	3.43648
Up	ENSG00000176155	2.64744	0.0437	CCDC57	17q25.3	protein_coding	3.3654	2.8789	6.91926	5.41735	5.10379	5.63797
Up	ENSG00000147459	2.64572	0.0425	DOCK5	8p21.2	protein_coding	0.628835	0.78895	4.28769	3.77027	2.61651	2.744
Up	ENSG00000198720	2.64506	0.05	ANKRD13B	17q11.2	protein_coding	2.15415	2.24491	5.83943	3.80144	4.54529	5.19221
Up	ENSG00000117318	2.64461	0.00359	ID3	1p36.12	protein_coding	4.27582	4.28011	6.88218	6.83941	6.74089	7.22781
Up	ENSG00000133026	2.64394	0.0229	MYH10	17p13.1	protein_coding	2.72134	1.76149	4.32597	5.40832	4.70975	5.09739
Up	ENSG00000120868	2.64162	0.0078	APAF1	12q23.1	protein_coding	1.18643	1.13171	3.87673	3.54626	3.50888	4.27089
Up	ENSG00000182809	2.64144	0.0692	CRIP2	14q32.33	protein_coding	5.73734	4.53851	9.0371	7.00648	7.69911	7.3748
Up	ENSG00000101350	2.64076	0.00276	KIF3B	20q11.21	protein_coding	0.905628	0.880653	3.66868	3.65859	3.31246	3.49586
Up	ENSG00000244038	2.63981	0.062	DDOST	1p36.12	protein_coding	4.88661	5.2092	7.50099	8.27415	6.42308	8.55265
Up	ENSG00000064309	2.63863	0.00716	CDON	11q24.2	protein_coding	0.254583	0.892897	3.48277	3.27486	3.06861	3.02325
Up	ENSG00000105926	2.63812	0.0453	MPP6	7p15.3	protein_coding	1.42092	2.38776	5.40547	4.56576	3.6085	4.5901
Up	ENSG00000162236	2.63763	0.00461	STX5	11q12.3	protein_coding	3.56267	3.30879	5.83967	6.14296	5.94185	6.36897
Up	ENSG00000071991	2.63761	0.0576	CDH19	18q22.1	protein_coding	0.165862	0	1.69841	3.84546	3.01849	2.3198
Up	ENSG00000169855	2.63699	0.0218	ROBO1	3p12.3	protein_coding	1.36557	1.96321	4.43704	5.0019	3.77977	3.98682
Up	ENSG00000157593	2.6363	0.0665	SLC35B2	6p21.1	protein_coding	3.26377	3.7093	6.14799	7.38354	5.01505	5.94478
Up	ENSG00000094916	2.63618	0.0319	CBX5	12q13.13	protein_coding	2.11237	1.57949	4.46684	4.71524	3.56643	5.17995
Up	ENSG00000213614	2.63477	0.0106	HEXA	15q23	protein_coding	4.46694	4.72435	7.00651	7.74596	6.83943	7.32977
Up	ENSG00000177606	2.63456	0.0554	JUN	1p32.1	protein_coding	6.65678	5.55953	8.62819	9.84591	7.97591	8.52086
Up	ENSG00000159214	2.63283	0.066	CCDC24	1p34.1	protein_coding	1.23704	0.401566	4.74249	3.25812	2.53438	3.27351
Up	ENSG00000263528	2.63225	0.0078	IKBKE	1q32.1	protein_coding	0.255558	0.165776	3.32791	2.49285	2.73344	2.81748
Up	ENSG00000077713	2.63204	0.0211	SLC25A43	Xq24	protein_coding	0.668542	0.801466	3.61708	3.81633	3.52165	2.51312
Up	ENSG00000069966	2.63195	0.0326	GNB5	15q21.2	protein_coding	1.326	1.0691	3.92434	4.70215	2.97601	3.71549
Up	ENSG00000197157	2.63083	0.0209	SND1	7q32.1	protein_coding	3.83595	4.42855	6.81764	6.65768	6.14633	7.4307
Up	ENSG00000197948	2.6293	0.0338	FCHSD1	5q31.3	protein_coding	2.37415	1.17598	5.16508	4.05791	3.99703	4.39747
Up	ENSG00000165282	2.62877	0.0428	PIGO	9p13.3	protein_coding	1.50662	1.6614	3.83512	4.514	3.32571	5.17629
Up	ENSG00000186891	2.62843	0.0723	TNFRSF18	1p36.33	protein_coding	0.233967	0.133328	4.12523	2.05502	3.12257	1.9455
Up	ENSG00000144455	2.62759	0.0352	SUMF1	3p26.1	protein_coding	1.51707	2.32293	4.32776	5.41452	4.61453	3.83355
Up	ENSG00000278635	2.62752	0.0657		12p13.31	unprocessed_pseudogene	0.7401	0	3.07659	1.8364	2.95411	4.12317
Up	ENSG00000143753	2.62704	0.00653	DEGS1	1q42.11	protein_coding	2.88553	3.48126	5.5751	6.02486	5.92712	5.71466
Up	ENSG00000151233	2.62673	0.0391	GXYLT1	12q12	protein_coding	0.67645	0.39499	2.64651	3.90124	2.36982	3.73225
Up	ENSG00000069399	2.62634	0.0751	BCL3	19q13.32	protein_coding	3.47095	4.16329	7.2068	6.68818	6.90248	4.97638
Up	ENSG00000138386	2.62632	0.0168	NAB1	2q32.2	protein_coding	2.02738	1.56009	4.08572	5.11744	4.37758	4.09948
Up	ENSG00000145386	2.62557	0.0598	CCNA2	4q27	protein_coding	0.446096	0.192464	3.30458	3.34677	1.55396	3.57409
Up	ENSG00000197124	2.62523	0.0677	ZNF682	19p12	protein_coding	0.733507	0.0873488	3.65669	2.85281	1.75804	3.8751
Up	ENSG00000106105	2.62521	0.0351	GARS1	7p14.3	protein_coding	3.97929	4.89533	7.38691	6.20446	7.66886	6.98985
Up	ENSG00000067955	2.62511	0.0156	CBFB	16q22.1	protein_coding	2.58577	3.10522	5.37726	5.13424	5.23609	6.13483
Up	ENSG00000135835	2.62412	0.00458	KIAA1614	1q25.3	protein_coding	0.523175	0.732219	3.47603	3.43728	3.0507	3.04326
Up	ENSG00000142149	2.62405	0.0981	HUNK	21q22.11	protein_coding	0.0811883	0.0719535	1.84902	2.25841	2.26102	4.43405
Up	ENSG00000160293	2.62323	0.0161	VAV2 ENSG00000160293	9q34.2	protein_coding	1.17725	0.912347	4.35392	3.56954	3.58233	3.16632
Up	ENSG00000234500	2.62143	0.092		7q11.21	unprocessed_pseudogene	0.230792	0.252825	4.19522	2.25445	1.64608	3.35721
Up	ENSG00000151292	2.62034	0.0176	CSNK1G3	5q23.2	protein_coding	1.42497	1.39356	3.49968	4.64202	4.30019	3.67654
Up	ENSG00000170248	2.62009	0.0293	PDCD6IP	3p22.3	protein_coding	3.4146	3.71705	5.94916	6.76102	5.3455	6.68797
Up	ENSG00000250506	2.61994	0.046	CDK3	17q25.1	protein_coding	2.81714	1.84798	4.73201	4.19531	4.93084	5.95187
Up	ENSG00000227671	2.6197	0.0123	ZNF731P	1q44	transcribed_unprocessed_pseudogene	2.33514	1.59422	4.52735	4.53213	4.25093	5.02712
Up	ENSG00000105612	2.61887	0.0127	DNASE2	19p13.13	protein_coding	2.73449	2.79743	5.84868	5.63983	4.84346	5.20735
Up	ENSG00000196639	2.61841	0.0712	HRH1	3p25.3	protein_coding	0.316555	0.580558	2.62689	2.18142	4.5032	2.95634
Up	ENSG00000081377	2.61773	0.0749	CDC14B	9q22.33	protein_coding	0.962217	1.20207	4.95657	4.03806	2.57122	3.23365
Up	ENSG00000169255	2.61641	0.01	B3GALNT1	3q26.1	protein_coding	0.743956	0.521784	2.78229	3.70989	3.36093	3.14403
Up	ENSG00000173456	2.61623	0.0525	RNF26	11q23.3	protein_coding	1.75053	2.20716	4.69846	4.97871	3.36414	5.33897
Up	ENSG00000213638	2.61603	0.023	ADAT3	19p13.3	protein_coding	0.620425	0.231615	3.7446	2.58418	2.53696	3.30246
Up	ENSG00000204991	2.61204	0.0707	SPIRE2	16q24.3	protein_coding	0.334515	0.27388	4.05938	2.44697	1.77338	3.38524
Up	ENSG00000090054	2.61183	0.0097	SPTLC1	9q22.31	protein_coding	2.85667	3.3062	5.24172	5.62235	5.8885	6.02049
Up	ENSG00000197535	2.61136	0.00491	MYO5A	15q21.2	protein_coding	1.09768	1.21435	3.69133	4.04184	3.44079	3.89554
Up	ENSG00000131089	2.61002	0.0226	ARHGEF9	Xq11.2	protein_coding	1.466	1.54455	4.344	4.45239	3.22364	4.44116
Up	ENSG00000120539	2.60883	0.0152	MASTL	10p12.1	protein_coding	0.562607	0.22309	2.87986	3.05339	3.60385	2.46962
Up	ENSG00000152061	2.60725	0.0134	RABGAP1L	1q25.1	protein_coding	1.28924	1.26215	3.47741	4.52632	3.86964	3.65839
Up	ENSG00000152669	2.60702	0.0523	CCNO	5q11.2	protein_coding	0	0	3.19725	2.47475	1.42005	3.33604
Up	ENSG00000103966	2.60668	0.0547	EHD4	15q15.1	protein_coding	1.4409	0.9934	3.00922	3.1291	4.60657	4.55041
Up	ENSG00000143179	2.60616	0.0922	UCK2	1q24.1	protein_coding	1.77672	2.82655	4.12805	4.05181	6.27386	5.17745
Up	ENSG00000023892	2.60594	0.0448	DEF6	6p21.31	protein_coding	0.634226	1.20126	4.34408	2.45682	3.67608	3.61776
Up	ENSG00000106665	2.60434	0.0208	CLIP2	7q11.23	protein_coding	1.1564	1.44747	4.62934	3.5612	4.05703	3.37752
Up	ENSG00000136274	2.60363	0.0507	NACAD	7p13	protein_coding	0.263109	0.445751	4.0207	1.99464	2.62858	3.18832
Up	ENSG00000096093	2.60224	0.0176	EFHC1	6p12.2	protein_coding	1.59056	2.26636	5.12347	4.37597	4.5789	4.04446
Up	ENSG00000099364	2.60097	0.022	FBXL19	16p11.2	protein_coding	1.53595	2.07947	5.04638	3.7341	4.30655	4.54768
Up	ENSG00000240370	2.60021	0.0684	RPL13P5	12p13.31	transcribed_processed_pseudogene	2.23273	1.3208	3.49771	4.4752	3.92118	5.61381
Up	ENSG00000117425	2.60002	0.0901	PTCH2	1p34.1	protein_coding	0.979248	0.610631	3.78443	3.94222	1.74901	4.10419
Up	ENSG00000004838	2.5999	0.0406	ZMYND10	3p21.31	protein_coding	0.816234	0.271617	3.67113	2.43309	2.57202	3.89905
Up	ENSG00000114423	2.59915	0.0665	CBLB	3q13.11	protein_coding	2.16288	1.79396	4.22442	3.6136	5.8975	4.57477
Up	ENSG00000111321	2.59894	0.0207	LTBR	12p13.31	protein_coding	4.05339	4.21516	7.37675	6.57325	6.03871	6.94414
Up	ENSG00000198018	2.59769	0.0382	ENTPD7	10q24.2	protein_coding	0.0355352	0.54319	2.59287	3.62802	3.32047	2.00683
Up	ENSG00000164930	2.59766	0.0371	FZD6	8q22.3	protein_coding	0.927239	0.622955	2.63707	4.15631	2.85633	3.84131
Up	ENSG00000168405	2.59684	0.0685	CMAHP	6p22.2	transcribed_unitary_pseudogene	1.81045	1.77171	5.69669	4.26796	4.29439	3.29265
Up	ENSG00000198743	2.59544	0.0973	SLC5A3	21q22.11	protein_coding	0.259158	0.185839	1.63655	4.13821	2.09856	3.39843
Up	ENSG00000139083	2.59397	0.0348	ETV6	12p13.2	protein_coding	0.953322	1.50945	3.26271	3.19847	4.36015	4.48012
Up	ENSG00000196517	2.59385	0.0786	SLC6A9	1p34.1	protein_coding	0.894829	0.328714	3.45789	2.79717	2.08035	4.48707
Up	ENSG00000126787	2.59287	0.0611	DLGAP5	14q22.3	protein_coding	0	0	3.34219	2.5107	1.29754	3.22105
Up	ENSG00000160310	2.59045	0.0234	PRMT2	21q22.3	protein_coding	3.87773	3.83558	6.80422	7.04394	5.69293	6.24733
Up	ENSG00000137161	2.58876	0.00706	CNPY3	6p21.1	protein_coding	2.71644	2.62397	5.67995	5.17647	5.27674	4.90268
Up	ENSG00000185803	2.58758	0.0707	SLC52A2	8q24.3	protein_coding	2.79837	2.53839	5.64113	4.20986	4.72114	6.45171
Up	ENSG00000249619	2.58711	0.0281	HMGN1P13	5q22.1	processed_pseudogene	0	0	2.7996	3.35145	2.4028	1.79458
Up	ENSG00000138031	2.58649	0.00882	ADCY3	2p23.3	protein_coding	3.35188	3.81225	6.58752	5.85813	6.02331	6.20526
Up	ENSG00000196550	2.58459	0.0368	FAM72A	1q32.1	protein_coding	0.70503	0.875322	3.13473	4.47587	2.97566	2.91282
Up	ENSG00000277443	2.58434	0.0436	MARCKS	6q21	protein_coding	2.9393	2.53525	5.81687	4.44445	6.1245	4.90063
Up	ENSG00000215472	2.58343	0.0757	RPL17-C18orf32	18q21.1	protein_coding	0	1.0947	3.01004	2.98962	2.14559	4.37789
Up	ENSG00000121152	2.58328	0.0994	NCAPH	2q11.2	protein_coding	0.328456	0.273311	2.52364	2.23865	2.16829	4.60609
Up	ENSG00000139722	2.58171	0.0404	VPS37B	12q24.31	protein_coding	2.50313	2.80648	5.04615	4.24491	5.71419	5.94082
Up	ENSG00000242247	2.58027	0.014	ARFGAP3	22q13.2	protein_coding	2.68327	3.44527	5.26265	5.56096	6.09545	5.65909
Up	ENSG00000101199	2.57752	0.0584	ARFGAP1	20q13.33	protein_coding	5.37948	4.62333	8.23836	6.62958	7.08323	8.36451
Up	ENSG00000104728	2.57751	0.0369	ARHGEF10	8p23.3	protein_coding	2.31463	1.45216	5.21953	4.58433	3.63271	4.40705
Up	ENSG00000104765	2.5761	0.0277	BNIP3L ENSG00000104765	8p21.2	protein_coding	2.71371	2.9392	4.96582	6.28118	5.48319	4.88001
Up	ENSG00000160588	2.57603	0.0589	MPZL3	11q23.3	protein_coding	0.0930192	0.0702863	2.39706	2.61476	1.71422	3.90469
Up	ENSG00000152240	2.57541	0.0157	HAUS1	18q21.1	protein_coding	1.69646	1.82896	4.23004	4.29013	3.82937	5.00293
Up	ENSG00000123427	2.57437	0.0833	EEF1AKMT3	12q14.1	protein_coding	1.25038	0.996003	4.4613	3.56244	2.24658	4.51995
Up	ENSG00000196411	2.5702	0.0174	EPHB4	7q22.1	protein_coding	2.38993	2.10289	5.22122	4.60836	4.19996	5.23689
Up	ENSG00000136059	2.56971	0.0351	VILL	3p22.2	protein_coding	0.958562	1.12959	4.12247	3.28612	2.76169	4.28488
Up	ENSG00000101544	2.56908	0.0446	ADNP2	18q23	protein_coding	0.850923	0.817259	2.86392	4.24757	3.91665	2.58453
Up	ENSG00000080608	2.569	0.0472	PUM3	9p24.2	protein_coding	1.7297	2.09583	4.87675	4.13746	5.38237	3.53046
Up	ENSG00000154146	2.56895	0.0562	NRGN	11q24.2	protein_coding	1.98732	1.29326	5.28064	3.43673	4.47475	3.64483
Up	ENSG00000106799	2.56823	0.0392	TGFBR1	9q22.33	protein_coding	1.46635	1.51091	4.1661	3.98104	4.96365	3.11665
Up	ENSG00000100997	2.56737	0.00558	ABHD12	20p11.21	protein_coding	2.76921	2.4187	5.2652	5.34389	4.80486	5.23135
Up	ENSG00000110057	2.56661	0.0275	UNC93B1	11q13.2	protein_coding	1.84527	2.07673	4.85272	4.14249	3.86385	5.25137
Up	ENSG00000105771	2.56658	0.0695	SMG9	19q13.31	protein_coding	3.3182	2.66592	6.57223	4.83282	4.67508	6.15444
Up	ENSG00000149212	2.56655	0.0723	SESN3	11q21	protein_coding	2.19591	0.90508	4.02071	5.19009	3.11454	4.14282
Up	ENSG00000270629	2.56613	0.0357	NBPF14	1q21.2	protein_coding	1.92622	1.99932	4.63202	4.05707	5.51403	3.91246
Up	ENSG00000123374	2.56511	0.0448	CDK2	12q13.2	protein_coding	2.41583	2.82402	5.15213	5.31411	4.17826	6.09566
Up	ENSG00000151176	2.5647	0.0267	PLBD2	12q24.13	protein_coding	2.74342	3.30034	6.01277	5.3202	4.87929	6.13409
Up	ENSG00000122707	2.56446	0.0109	RECK	9p13.3	protein_coding	1.07448	1.19232	3.18271	3.93701	3.58419	4.08754
Up	ENSG00000123352	2.56239	0.0577	SPATS2	12q13.12	protein_coding	3.02479	2.73649	6.72936	4.69013	5.27479	5.07785
Up	ENSG00000166225	2.56233	0.0462	FRS2	12q15	protein_coding	1.17508	1.20186	2.84773	4.74565	3.39408	4.01571
Up	ENSG00000128346	2.56226	0.0519	C22orf23	22q13.1	protein_coding	1.4973	2.14586	4.7119	3.40179	5.30712	4.11455
Up	ENSG00000102302	2.55987	0.0491	FGD1	Xp11.22	protein_coding	1.07376	1.13698	4.9175	3.33491	3.17062	3.23792
Up	ENSG00000185842	2.55986	0.033	DNAH14	1q42.12	protein_coding	0	0.479241	3.09628	3.46159	2.74812	1.89193
Up	ENSG00000160410	2.55806	0.0465	SHKBP1	19q13.2	protein_coding	3.71464	3.1304	6.32135	4.82432	6.22511	6.55154
Up	ENSG00000277147	2.5559	0.00361	LINC00869	1q21.2	transcribed_unprocessed_pseudogene	3.35768	3.55393	6.03136	5.7986	5.97587	6.24099
Up	ENSG00000154760	2.5558	0.0343	SLFN13	17q12	protein_coding	0.589571	0.354368	3.41693	2.5704	2.31449	3.80926
Up	ENSG00000227500	2.55452	0.0272	SCAMP4 ENSG00000227500	19p13.3	protein_coding	3.4445	3.23727	6.59585	5.83826	5.07588	6.07164
Up	ENSG00000006634	2.55155	0.0403	DBF4	7q21.12	protein_coding	0.952382	1.22801	3.00102	3.23386	3.62922	4.70288
Up	ENSG00000165801	2.54967	0.0208	ARHGEF40 ENSG00000165801	14q11.2	protein_coding	3.35966	3.42506	6.77124	5.55011	5.69053	5.75623
Up	ENSG00000125746	2.54929	0.0902	EML2	19q13.32	protein_coding	2.66543	3.27523	6.86101	5.25761	4.29129	5.66855
Up	ENSG00000184743	2.54791	0.0111	ATL3	11q13.1	protein_coding	1.4589	1.50288	3.82929	4.31615	4.41382	3.55591
Up	ENSG00000123353	2.54497	0.0743	ORMDL2	12q13.2	protein_coding	1.43743	2.45768	3.57838	4.47227	4.17856	5.7409
Up	ENSG00000196937	2.54411	0.00449	FAM3C	7q31.31	protein_coding	3.00357	3.17892	5.32525	5.64425	5.71652	5.85539
Up	ENSG00000185201	2.54336	0.0588	IFITM2	11p15.5	protein_coding	5.1352	5.30906	6.89184	7.1	8.41079	8.65932
Up	ENSG00000244165	2.54327	0.0466	P2RY11	19p13.2	protein_coding	2.36895	2.48712	4.66575	3.96845	5.50587	5.74514
Up	ENSG00000101911	2.54274	0.0141	PRPS2	Xp22.2	protein_coding	1.05495	0.607457	2.75595	3.70048	3.55594	3.48339
Up	ENSG00000264538	2.54211	0.0521	SUZ12P1	17q11.2	transcribed_unprocessed_pseudogene	1.95151	1.44128	5.13551	3.72999	3.3704	4.71814
Up	ENSG00000275911	2.54113	0.0286	NDE1	CHR_HSCHR16_1_CTG1	protein_coding	1.91583	2.56946	5.47316	4.48958	4.12814	5.04422
Up	ENSG00000094804	2.54093	0.0428	CDC6	17q21.2	protein_coding	0.0512134	0.163348	2.21216	2.66601	1.97994	3.73474
Up	ENSG00000133195	2.53815	0.07	SLC39A11	17q25.1	protein_coding	1.37985	1.98235	2.97012	5.25313	4.42451	4.22924
Up	ENSG00000180198	2.53761	0.0381	RCC1 ENSG00000180198	1p35.3	protein_coding	1.84006	2.9164	4.70683	5.44134	4.16987	5.34533
Up	ENSG00000163513	2.53731	0.0918	TGFBR2	3p24.1	protein_coding	3.0313	3.24694	5.37778	6.51395	6.55839	4.2556
Up	ENSG00000171603	2.53624	0.0157	CLSTN1	1p36.22	protein_coding	4.26641	4.28994	7.13659	6.79749	6.13852	7.18506
Up	ENSG00000175970	2.53536	0.0418	UNC119B	12q24.31	protein_coding	1.93424	1.733	4.43869	4.5094	3.33879	5.18903
Up	ENSG00000067369	2.53406	0.0525	TP53BP1	15q15.3	protein_coding	1.96159	2.3871	5.35197	5.42979	3.69438	4.35747
Up	ENSG00000127863	2.53302	0.0361	TNFRSF19	13q12.12	protein_coding	0.676247	0.658375	3.95052	3.669	2.46008	2.72171
Up	ENSG00000172037	2.53109	0.0115	LAMB2	3p21.31	protein_coding	7.50073	6.52234	9.5645	9.42659	9.54942	9.62999
Up	ENSG00000064961	2.531	0.061	HMG20B	19p13.3	protein_coding	4.6306	3.69476	7.59108	5.80968	6.19656	7.1774
Up	ENSG00000021826	2.53064	0.0672	CPS1	2q34	protein_coding	0.509321	0.0975205	2.90283	3.99346	1.69701	2.74296
Up	ENSG00000132359	2.52903	0.0265	RAP1GAP2	17p13.3	protein_coding	0.737448	0.343319	3.19477	3.16595	2.23886	3.67807
Up	ENSG00000186193	2.52898	0.0557	SAPCD2	9q34.3	protein_coding	0.0326369	0	3.55731	1.46789	2.36076	2.79523
Up	ENSG00000166734	2.52696	0.0127	GOLM2	15q15.3	protein_coding	2.77874	3.01888	5.04654	5.98662	5.50111	5.16883
Up	ENSG00000161179	2.52692	0.0541	YDJC	22q11.21	protein_coding	2.03865	1.49121	5.13758	4.03759	3.24968	4.74255
Up	ENSG00000196284	2.52679	0.0678	SUPT3H	6p21.1	protein_coding	0.704604	1.25601	3.50982	4.29064	2.20153	4.0264
Up	ENSG00000089169	2.52601	0.0473	RPH3A	12q24.13	protein_coding	0	0.162504	3.62749	1.69032	2.34562	2.76564
Up	ENSG00000173917	2.52489	0.0266	HOXB2	17q21.32	protein_coding	3.11539	2.54195	4.89078	5.89459	4.81991	5.80896
Up	ENSG00000108256	2.52356	0.059	NUFIP2	17q11.2	protein_coding	1.65913	1.89245	3.34168	5.41511	4.54345	3.89716
Up	ENSG00000102100	2.5227	0.0214	SLC35A2	Xp11.23	protein_coding	2.67979	2.3796	5.47673	5.11755	4.26288	5.3524
Up	ENSG00000134333	2.52221	0.0193	LDHA	11p15.1	protein_coding	6.31614	7.49325	9.23305	9.46993	9.73599	9.26864
Up	ENSG00000147804	2.52129	0.0365	SLC39A4	8q24.3	protein_coding	2.8876	1.89397	4.76067	4.79423	4.3418	5.75158
Up	ENSG00000102158	2.5206	0.0272	MAGT1	Xq21.1	protein_coding	2.43465	2.48902	5.71262	5.27345	4.32915	4.6145
Up	ENSG00000026103	2.52056	0.0666	FAS ENSG00000026103	10q23.31	protein_coding	0.789109	1.12806	4.42142	3.29671	3.94298	2.25546
Up	ENSG00000198513	2.51999	0.01	ATL1	14q22.1	protein_coding	1.15328	0.775646	3.08347	3.92965	3.46115	3.46353
Up	ENSG00000091039	2.51928	0.00729	OSBPL8	12q21.2	protein_coding	1.33852	0.965518	3.67694	4.05337	3.39299	3.5619
Up	ENSG00000160584	2.51804	0.00455	SIK3	11q23.3	protein_coding	3.03505	3.55854	5.7884	5.87739	5.69555	5.898
Up	ENSG00000159055	2.51789	0.0664	MIS18A	21q22.11	protein_coding	0.990842	0.628253	3.09756	2.49083	3.05831	4.66304
Up	ENSG00000100600	2.51763	0.0419	LGMN	14q32.12	protein_coding	4.16644	4.50534	6.2882	7.4325	7.56964	6.12376
Up	ENSG00000166073	2.51721	0.034	GPR176	15q15.1	protein_coding	0.994006	0.626349	2.55246	4.14683	3.07518	3.53509
Up	ENSG00000167543	2.51467	0.0613	TP53I13	17q11.2	protein_coding	3.74187	4.582	7.85899	6.66508	5.93859	6.24375
Up	ENSG00000234498	2.51423	0.0983	RPL13AP20	12p13.1	processed_pseudogene	0	0	2.75479	1.08938	2.40443	3.8083
Up	ENSG00000068489	2.51408	0.0712	PRR11	17q22	protein_coding	0.1614	0.185496	3.91566	2.39316	1.58748	2.85383
Up	ENSG00000174292	2.51194	0.0453	TNK1	17p13.1	protein_coding	0.661142	0.608418	4.05724	3.53743	2.33757	2.65463
Up	ENSG00000147996	2.51153	0.00876	CBWD5	9q21.11	protein_coding	3.12207	3.29818	5.44976	5.80966	5.45809	6.16911
Up	ENSG00000070444	2.51137	0.0168	MNT	17p13.3	protein_coding	2.66027	2.58953	5.80413	4.82437	4.71523	5.20134
Up	ENSG00000131470	2.51023	0.0468	PSMC3IP	17q21.2	protein_coding	1.23896	1.03084	3.46473	3.66693	2.75564	4.69319
Up	ENSG00000157240	2.51016	0.0275	FZD1	7q21.13	protein_coding	0.96959	0.771051	3.62629	3.13345	4.10412	2.65806
Up	ENSG00000124783	2.5099	0.0368	SSR1	6p24.3	protein_coding	3.43888	3.63318	5.35266	7.03534	5.7699	6.02583
Up	ENSG00000092978	2.50963	0.0252	GPATCH2	1q41	protein_coding	0.724809	0.383216	3.78136	3.23002	2.39898	2.8442
Up	ENSG00000094975	2.50749	0.0684	SUCO	1q24.3	protein_coding	1.37866	1.03618	2.80211	5.03659	3.47492	3.54604
Up	ENSG00000100258	2.50704	0.0556	LMF2	22q13.33	protein_coding	4.47529	4.28695	7.81891	6.32712	6.0089	7.39771
Up	ENSG00000173486	2.50704	0.0188	FKBP2	11q13.1	protein_coding	5.30251	4.51177	7.46747	7.41192	6.88858	7.88873
Up	ENSG00000086848	2.5055	0.00939	ALG9	11q23.1	protein_coding	2.40959	2.18404	4.60947	5.28591	4.82	4.49387
Up	ENSG00000169100	2.50444	0.0366	SLC25A6	Xp22.33	protein_coding	5.44322	5.47151	8.43347	8.43998	8.05243	6.92134
Up	ENSG00000059915	2.50318	0.0628	PSD	10q24.32	protein_coding	1.50784	1.19192	4.92035	2.91503	3.32168	4.25518
Up	ENSG00000227460	2.50243	0.0615	SYNGAP1	CHR_HSCHR6_MHC_SSTO_CTG1	protein_coding	1.83799	0.411786	4.52182	3.61472	2.82662	3.5461
Up	ENSG00000140526	2.50157	0.0356	ABHD2	15q26.1	protein_coding	1.25735	1.66259	4.67018	4.04758	4.10565	3.02277
Up	ENSG00000141012	2.50106	0.0568	GALNS	16q24.3	protein_coding	2.15857	2.75329	6.17111	4.75814	4.27721	4.6215
Up	ENSG00000155380	2.50102	0.0626	SLC16A1	1p13.2	protein_coding	3.37985	3.9195	5.19698	7.3052	6.26837	5.83224
Up	ENSG00000284491	2.50056	0.0641	THSD8	19p13.13	protein_coding	0.873142	1.23094	4.65879	2.80401	2.80643	3.94118
Up	ENSG00000149489	2.50002	0.0692	ROM1	11q12.3	protein_coding	1.59609	1.1275	5.08132	3.96283	2.84344	3.55969
Up	ENSG00000099139	2.49965	0.0222	PCSK5	9q21.13	protein_coding	0.891416	0.543783	3.48648	2.48994	3.75289	3.13969
Up	ENSG00000050405	2.4995	0.0223	LIMA1	12q13.12	protein_coding	3.50981	3.12482	5.93193	5.01643	6.15154	6.16736
Up	ENSG00000177239	2.49877	0.0392	MAN1B1	9q34.3	protein_coding	3.64604	3.68912	6.95598	6.53154	5.90777	5.2701
Up	ENSG00000102316	2.49874	0.0476	MAGED2	Xp11.21	protein_coding	6.45423	5.3498	8.95383	8.84828	7.49236	8.30855
Up	ENSG00000113758	2.49799	0.0288	DBN1	5q35.3	protein_coding	3.52229	3.62982	6.37387	5.12599	6.28414	6.51219
Up	ENSG00000268350	2.4979	0.0797	FAM156A	Xp11.22	protein_coding	2.89681	2.56909	5.81152	5.48877	3.7434	5.87971
Up	ENSG00000168282	2.4975	0.0164	MGAT2	14q21.3	protein_coding	1.96332	1.93855	3.75347	4.56889	4.87894	4.59245
Up	ENSG00000182511	2.4972	0.0425	FES	15q26.1	protein_coding	2.60863	1.99257	5.58649	3.93638	4.52622	5.14209
Up	ENSG00000166471	2.49718	0.00753	TMEM41B	11p15.4	protein_coding	2.41203	2.02914	4.49239	5.01393	4.89951	4.46524
Up	ENSG00000169410	2.49702	0.0202	PTPN9	15q24.2	protein_coding	1.53192	1.84406	4.7806	3.90442	3.61185	4.44318
Up	ENSG00000188766	2.497	0.0396	SPRED3	19q13.2	protein_coding	0.0263766	0.651678	3.81171	2.5089	2.21798	2.80553
Up	ENSG00000125868	2.494	0.017	DSTN	20p12.1	protein_coding	5.35994	4.87626	7.1576	7.4817	8.23983	7.56926
Up	ENSG00000175106	2.49358	0.0582	TVP23C	17p12	protein_coding	1.25098	1.6592	4.6621	4.48615	2.7536	3.89286
Up	ENSG00000077232	2.49295	0.0267	DNAJC10	2q32.1	protein_coding	2.68225	2.03422	4.21026	5.45743	4.59955	5.13752
Up	ENSG00000184164	2.49281	0.0138	CRELD2	22q13.33	protein_coding	3.62477	3.82816	6.66101	6.17095	5.64071	6.40443
Up	ENSG00000124772	2.49117	0.019	CPNE5	6p21.2	protein_coding	0.214426	0.0560591	1.99467	2.42165	3.13143	2.95789
Up	ENSG00000167081	2.48835	0.0477	PBX3	9q33.3	protein_coding	1.56731	3.16743	5.24322	4.87891	4.19038	5.11038
Up	ENSG00000122705	2.48769	0.0541	CLTA	9p13.3	protein_coding	5.01733	5.14629	7.16908	6.90922	7.39985	8.79984
Up	ENSG00000140044	2.48676	0.0156	JDP2	14q24.3	protein_coding	3.7614	3.12302	6.47607	5.55839	5.79527	5.88615
Up	ENSG00000159200	2.48658	0.076	RCAN1	21q22.12	protein_coding	3.33553	3.40216	5.21153	5.36351	7.32513	5.5215
Up	ENSG00000116584	2.48639	0.0261	ARHGEF2	1q22	protein_coding	3.79716	3.1883	6.1564	5.47819	5.60126	6.68062
Up	ENSG00000235986	2.48594	0.0799	GNL1	CHR_HSCHR6_MHC_COX_CTG1	protein_coding	0.583037	1.32599	4.17538	4.00481	2.05282	3.52882
Up	ENSG00000065154	2.48482	0.0469	OAT ENSG00000065154	10q26.13	protein_coding	3.82018	4.85385	6.66191	7.79216	6.61259	6.2207
Up	ENSG00000105404	2.48477	0.0059	RABAC1	19q13.2	protein_coding	6.01686	6.02536	8.76705	8.58873	8.11399	8.55374
Up	ENSG00000172687	2.48463	0.0442	ZNF738	19p12	protein_coding	0.905546	0.901606	4.2035	3.59821	2.34921	3.40193
Up	ENSG00000171608	2.48391	0.0975	PIK3CD	1p36.22	protein_coding	0.554055	0.372512	3.58035	3.692	3.18866	1.32777
Up	ENSG00000189190	2.48378	0.00322	ZNF600	19q13.41	protein_coding	0.371431	0.412122	2.97384	2.81386	2.67186	3.04268
Up	ENSG00000006715	2.48348	0.0152	VPS41	7p14.1	protein_coding	2.17416	2.49851	5.0888	5.19368	4.20399	4.79277
Up	ENSG00000113387	2.4826	0.033	SUB1	5p13.3	protein_coding	5.37752	5.63475	7.49518	8.96857	7.84	7.65122
Up	ENSG00000116962	2.48258	0.0408	NID1	1q42.3	protein_coding	2.45594	2.7753	4.67365	5.99682	5.36752	4.35482
Up	ENSG00000171533	2.48224	0.0975	MAP6	11q13.5	protein_coding	0.487939	0.352626	3.61403	4.05919	1.80838	2.12851
Up	ENSG00000131351	2.48204	0.0436	HAUS8	19p13.11	protein_coding	1.87456	1.19227	4.86105	3.1329	3.90682	4.16104
Up	ENSG00000100767	2.48127	0.0483	PAPLN	14q24.2	protein_coding	0.922051	0.818565	4.53533	2.84378	3.17409	2.85312
Up	ENSG00000137804	2.48067	0.0902	NUSAP1	15q15.1	protein_coding	2.80478	2.59104	5.81885	4.94818	3.78561	6.1617
Up	ENSG00000169045	2.48039	0.0221	HNRNPH1	5q35.3	protein_coding	6.36245	6.20695	8.26026	9.37693	9.09213	8.33102
Up	ENSG00000109586	2.48003	0.0413	GALNT7	4q34.1	protein_coding	0.360877	0.642667	2.29923	4.02515	2.70909	2.89374
Up	ENSG00000163808	2.47975	0.0788	KIF15 ENSG00000163808	3p21.31	protein_coding	0.0530794	0	2.20821	1.92301	1.89953	3.99439
Up	ENSG00000124155	2.47934	0.0168	PIGT	20q13.12	protein_coding	4.1587	4.80913	6.89913	7.33973	6.42098	7.19319
Up	ENSG00000140859	2.47889	0.0387	KIFC3	16q21	protein_coding	4.09953	3.03238	6.72968	5.53197	6.32124	5.59647
Up	ENSG00000078246	2.4776	0.0148	TULP3	12p13.33	protein_coding	2.16208	2.22207	5.02047	4.71688	4.01563	4.92572
Up	ENSG00000165359	2.47743	0.0286	INTS6L	Xq26.3	protein_coding	0.803697	0.513825	2.63465	4.00262	3.16831	2.73919
Up	ENSG00000068028	2.47573	0.061	RASSF1	3p21.31	protein_coding	3.47202	3.08941	6.93432	4.96627	5.22313	5.90207
Up	ENSG00000073331	2.4757	0.0389	ALPK1	4q25	protein_coding	0.719496	0.770294	3.79293	3.74041	2.23435	3.11468
Up	ENSG00000155363	2.47562	0.0755	MOV10	1p13.2	protein_coding	3.82929	2.76908	6.41988	4.98492	5.05012	6.64429
Up	ENSG00000139974	2.47504	0.0602	SLC38A6	14q23.1	protein_coding	2.47549	1.03084	5.10019	4.38469	3.7434	3.68453
Up	ENSG00000084652	2.47426	0.0245	TXLNA	1p35.2	protein_coding	2.77275	3.42236	5.03888	5.42691	5.53216	6.28931
Up	ENSG00000048649	2.4736	0.0275	RSF1	11q14.1	protein_coding	1.98474	1.63904	4.51622	4.85347	3.44281	4.32944
Up	ENSG00000100522	2.47207	0.0625	GNPNAT1	14q22.1	protein_coding	1.7552	2.45889	4.7648	3.67962	5.67516	4.19687
Up	ENSG00000161542	2.47159	0.0142	PRPSAP1	17q25.1	protein_coding	3.08581	3.48469	5.83057	6.28676	5.29915	5.61089
Up	ENSG00000029364	2.47122	0.0266	SLC39A9	14q24.1	protein_coding	2.08718	1.83853	4.31253	5.31394	4.0745	4.03536
Up	ENSG00000166886	2.46859	0.0246	NAB2	12q13.3	protein_coding	2.00181	2.40121	5.30638	4.08929	4.32085	4.96386
Up	ENSG00000097046	2.46743	0.0257	CDC7	1p22.1	protein_coding	0.0789855	0.667364	3.64949	2.5866	2.45348	2.67283
Up	ENSG00000153214	2.46736	0.0145	TMEM87B	2q13	protein_coding	0.691104	1.10596	3.88556	3.36599	3.34523	2.86678
Up	ENSG00000138160	2.46724	0.0281	KIF11	10q23.33	protein_coding	0.171331	0.0282565	2.8337	2.90433	1.63788	2.89222
Up	ENSG00000273656	2.46645	0.0846		CHR_HSCHR5_2_CTG1_1	transcribed_unprocessed_pseudogene	1.07078	1.00451	3.87517	4.6938	2.28156	3.16585
Up	ENSG00000101665	2.46457	0.0819	SMAD7	18q21.1	protein_coding	3.07139	3.06008	4.60664	4.87496	6.84359	5.796
Up	ENSG00000185480	2.46417	0.044	PARPBP	12q23.2	protein_coding	0.380542	0.199904	3.50468	2.50527	1.80267	3.20493
Up	ENSG00000108474	2.46399	0.0579	PIGL ENSG00000108474	17p11.2	protein_coding	2.42357	1.64367	5.51456	4.24436	3.59058	4.64092
Up	ENSG00000187240	2.46398	0.0121	DYNC2H1	11q22.3	protein_coding	1.25376	0.902408	3.47619	4.00687	3.08303	3.60215
Up	ENSG00000146828	2.46373	0.0354	SLC12A9	7q22.1	protein_coding	2.30214	2.0432	5.31746	4.21899	3.90073	5.10841
Up	ENSG00000177628	2.46236	0.0135	GBA	1q22	protein_coding	2.53523	2.71892	4.95163	5.69653	4.99211	4.71746
Up	ENSG00000244462	2.46235	0.052	RBM12	20q11.22	protein_coding	1.65282	2.25577	3.30197	5.13328	4.70194	4.52938
Up	ENSG00000102007	2.46043	0.0237	PLP2	Xp11.23	protein_coding	4.198	4.85726	7.42708	6.25547	7.13254	7.13716
Up	ENSG00000030582	2.45968	0.00548	GRN	17q21.31	protein_coding	4.73831	5.18422	7.55282	7.53678	7.43764	7.15654
Up	ENSG00000139880	2.45947	0.0665	CDH24	14q11.2	protein_coding	1.01533	0.444972	4.47974	2.58278	3.09668	2.59928
Up	ENSG00000073417	2.45932	0.0448	PDE8A	15q25.3	protein_coding	2.74473	2.56858	4.24339	4.84419	5.32212	6.05418
Up	ENSG00000136770	2.45846	0.0102	DNAJC1	10p12.31	protein_coding	1.79686	2.51618	4.71635	4.27364	4.75063	4.71928
Up	ENSG00000175220	2.45837	0.0523	ARHGAP1	11p11.2	protein_coding	3.19913	3.33613	6.72361	5.70184	5.76625	4.71228
Up	ENSG00000049192	2.45779	0.0806	ADAMTS6	5q12.3	protein_coding	0.105787	0.124897	3.51723	3.35295	1.84031	1.58205
Up	ENSG00000170522	2.4564	0.0275	ELOVL6	4q25	protein_coding	2.85596	2.09774	5.25068	4.7979	4.24787	5.43653
Up	ENSG00000139044	2.45611	0.00504	B4GALNT3	12p13.33	protein_coding	2.04244	1.99512	4.11438	4.60085	4.55263	4.63172
Up	ENSG00000180957	2.45597	0.0535	PITPNB	22q12.1	protein_coding	2.85855	2.81989	4.55724	4.6853	6.31514	5.62307
Up	ENSG00000068796	2.45578	0.0355	KIF2A	5q12.1	protein_coding	0.740236	1.10305	3.35749	4.16704	2.52032	3.46485
Up	ENSG00000118094	2.4551	0.0191	TREH	11q23.3	protein_coding	0	0	2.81043	2.98064	1.96912	2.06021
Up	ENSG00000100505	2.45415	0.0975	TRIM9	14q22.1	protein_coding	0.0464813	0.21778	2.91678	3.49462	1.00542	2.92828
Up	ENSG00000170561	2.45246	0.0326	IRX2	5p15.33	protein_coding	0.246249	0.219864	1.93129	3.19395	3.29041	2.32643
Up	ENSG00000136160	2.45246	0.031	EDNRB	13q22.3	protein_coding	1.18381	1.42074	3.00821	4.03055	4.48594	3.49425
Up	ENSG00000183049	2.45087	0.0596	CAMK1D	10p13	protein_coding	0.617002	0.832185	3.63608	3.3993	3.7737	1.89279
Up	ENSG00000102317	2.44831	0.00644	RBM3	Xp11.23	protein_coding	5.51448	5.48188	7.60755	7.87652	8.28847	8.01342
Up	ENSG00000068885	2.44726	0.0281	IFT80	3q25.33	protein_coding	1.52882	1.06384	3.65559	4.55389	3.6165	3.14837
Up	ENSG00000177963	2.44724	0.0178	RIC8A	11p15.5	protein_coding	3.67169	3.77822	6.78279	6.3435	5.66639	5.89611
Up	ENSG00000048405	2.44639	0.0471	ZNF800 ENSG00000048405	7q31.33	protein_coding	1.35841	1.51622	3.54957	3.44246	5.05597	3.48683
Up	ENSG00000108175	2.44619	0.0284	ZMIZ1	10q22.3	protein_coding	2.89078	3.13134	5.98448	5.93586	5.19838	4.7103
Up	ENSG00000169241	2.44509	0.02	SLC50A1	1q22	protein_coding	2.63153	2.07667	5.30022	4.16967	4.78725	4.93959
Up	ENSG00000123395	2.44409	0.0794	ATG101	12q13.13	protein_coding	3.48081	4.20343	5.14744	5.86979	7.01182	7.11577
Up	ENSG00000196141	2.44391	0.0463	SPATS2L	2q33.1	protein_coding	3.63352	5.11744	6.69455	6.6891	6.37727	7.51666
Up	ENSG00000171302	2.4432	0.0222	CANT1	17q25.3	protein_coding	3.11396	3.64337	6.18018	6.16046	5.09828	5.84853
Up	ENSG00000184304	2.44199	0.0544	PRKD1	14q12	protein_coding	1.08047	0.692701	3.55379	4.25019	3.22396	2.28635
Up	ENSG00000108641	2.44198	0.0446	B9D1	17p11.2	protein_coding	2.44259	1.95261	5.05246	5.4256	3.80382	4.27642
Up	ENSG00000125991	2.441	0.00814	ERGIC3 ENSG00000125991	20q11.22	protein_coding	5.44452	5.84294	8.11705	8.13414	7.70387	8.38384
Up	ENSG00000110697	2.44042	0.01	PITPNM1	11q13.2	protein_coding	2.66128	2.96982	5.70152	4.9751	5.00352	5.34372
Up	ENSG00000108654	2.44024	0.063	DDX5	17q23.3	protein_coding	7.00169	6.41325	8.03738	10.0022	9.60785	8.94343
Up	ENSG00000084234	2.43944	0.0299	APLP2	11q24.3	protein_coding	4.54752	5.0985	6.77972	8.08695	7.30201	6.88109
Up	ENSG00000119314	2.43816	0.0149	PTBP3	9q32	protein_coding	1.15701	1.06804	2.92931	3.82057	3.921	3.53188
Up	ENSG00000197956	2.43805	0.0329	S100A6	1q21.3	protein_coding	6.9668	6.88813	9.33059	8.70004	10.2735	9.15792
Up	ENSG00000108511	2.43787	0.0448	HOXB6	17q21.32	protein_coding	1.36392	0.174133	4.0663	2.75074	3.03732	2.97321
Up	ENSG00000115652	2.43743	0.02	UXS1	2q12.2	protein_coding	3.22115	3.52463	5.66554	6.36398	5.18055	6.03122
Up	ENSG00000161939	2.43571	0.0588	RNASEK-C17orf49	17p13.1	protein_coding	0.74616	0.418507	4.24298	2.59445	2.91443	2.32033
Up	ENSG00000104885	2.4355	0.0755	DOT1L ENSG00000104885	19p13.3	protein_coding	3.03084	2.78279	5.58002	3.98017	6.22769	5.5814
Up	ENSG00000113407	2.43419	0.027	TARS1	5p13.3	protein_coding	4.06733	4.71551	6.40145	7.61819	6.62407	6.65873
Up	ENSG00000049860	2.43309	0.037	HEXB	5q13.3	protein_coding	4.37283	4.24677	6.03828	6.71196	7.6959	6.52543
Up	ENSG00000073803	2.43303	0.015	MAP3K13	3q27.2	protein_coding	1.59621	0.680877	3.35989	3.92241	3.55302	3.45096
Up	ENSG00000239763	2.43297	0.0536		16q23.1	processed_pseudogene	0.430614	0	3.71665	2.72937	2.32752	1.81959
Up	ENSG00000113522	2.43267	0.0537	RAD50	5q31.1	protein_coding	1.03225	0.69617	3.47908	4.36977	2.61733	2.72134
Up	ENSG00000163389	2.43241	0.0342	POGLUT1	3q13.33	protein_coding	1.172	1.26208	3.42052	4.27665	2.80927	4.09136
Up	ENSG00000280618	2.43225	0.0253	CYFIP1	CHR_HSCHR15_1_CTG3	protein_coding	0.385378	0.582247	3.53373	2.32385	2.53698	3.2697
Up	ENSG00000079134	2.43223	0.0183	THOC1	18p11.32	protein_coding	3.25723	2.54278	5.83842	5.22461	4.86597	5.39997
Up	ENSG00000130147	2.43191	0.0262	SH3BP4	2q37.2	protein_coding	1.00013	2.32541	3.92645	4.24005	4.35637	3.85584
Up	ENSG00000262634	2.43149	0.0806	SKA1	CHR_HSCHR18_1_CTG1_1	protein_coding	0.0452472	0	2.80623	1.71189	1.60032	3.69802
Up	ENSG00000214021	2.43072	0.0679	TTLL3	3p25.3	protein_coding	4.13413	3.53208	7.50745	5.99009	5.42023	6.13755
Up	ENSG00000154380	2.42953	0.0317	ENAH	1q42.12	protein_coding	3.2863	3.12787	5.7242	6.16188	5.95404	4.70635
Up	ENSG00000240303	2.42908	0.0404	ACAD11	3q22.1	protein_coding	2.82343	1.98301	4.76831	5.58004	4.03065	4.95017
Up	ENSG00000089248	2.42776	0.048	ERP29	12q24.13	protein_coding	4.03566	4.04187	5.85465	6.52342	5.93336	7.55465
Up	ENSG00000221829	2.42676	0.0903	FANCG ENSG00000221829	9p13.3	protein_coding	2.63342	2.31026	5.10723	4.35011	3.88757	6.24948
Up	ENSG00000132842	2.42657	0.0354	AP3B1	5q14.1	protein_coding	2.06584	2.47722	3.71687	4.93524	5.0159	5.12438
Up	ENSG00000164934	2.42625	0.0228	DCAF13	8q22.3	protein_coding	2.45097	2.34679	4.20119	4.66102	4.91732	5.52099
Up	ENSG00000176624	2.42621	0.0433	MEX3C	18q21.2	protein_coding	1.56647	2.09895	3.28103	4.90535	4.64222	4.2071
Up	ENSG00000285265	2.42609	0.0942	NA	NANA	NA	1.00087	1.03216	1.96703	3.72132	4.48785	3.59423
Up	ENSG00000153993	2.42517	0.0513	SEMA3D	7q21.11	protein_coding	0.0196421	0.100418	3.19072	2.84052	1.33853	2.57104
Up	ENSG00000171444	2.42455	0.00959	MCC	5q22.2	protein_coding	0.899576	0.681624	3.03044	3.54503	3.45083	2.8343
Up	ENSG00000004897	2.42354	0.0261	CDC27	17q21.32	protein_coding	2.46449	3.28502	4.87332	5.94814	5.38026	4.99148
Up	ENSG00000124224	2.42184	0.00842	PPP4R1L	20q13.32	transcribed_unprocessed_pseudogene	1.045	0.569694	3.3295	2.8935	3.51245	3.18127
Up	ENSG00000198369	2.42135	0.0111	SPRED2	2p14	protein_coding	1.84971	1.92788	4.09418	3.88865	4.59273	4.66499
Up	ENSG00000173171	2.4207	0.00691	MTX1	1q22	protein_coding	2.88799	3.42625	5.64102	5.76518	5.58642	5.31867
Up	ENSG00000117151	2.42063	0.0537	CTBS	1p22.3	protein_coding	1.32558	1.30726	2.97861	4.87929	3.71606	3.37424
Up	ENSG00000166924	2.41994	0.044	NYAP1	7q22.1	protein_coding	0.03521	0.0509669	2.92038	2.62785	1.36164	2.94224
Up	ENSG00000099956	2.41986	0.0702	SMARCB1	22q11.23	protein_coding	1.36424	1.38165	4.87193	2.68143	3.5044	4.11347
Up	ENSG00000133138	2.41971	0.0683	TBC1D8B	Xq22.3	protein_coding	0.550407	0.20808	3.36284	3.77179	2.12116	1.94002
Up	ENSG00000149311	2.41925	0.0766	ATM	11q22.3	protein_coding	2.50607	2.4533	5.52711	5.74404	3.61917	4.7054
Up	ENSG00000139537	2.41789	0.0361	CCDC65	12q13.12	protein_coding	0.852026	0.610197	2.34108	3.4921	2.88023	3.8826
Up	ENSG00000143845	2.41653	0.00484	ETNK2 ENSG00000143845	1q32.1	protein_coding	0.740087	0.656025	3.01227	3.43826	3.08956	2.91826
Up	ENSG00000066322	2.41632	0.00966	ELOVL1 ENSG00000066322	1p34.2	protein_coding	3.3247	3.16994	5.43059	5.45474	5.60309	6.16615
Up	ENSG00000106404	2.41628	0.0761	CLDN15	7q22.1	protein_coding	1.69815	1.12322	3.3189	3.03411	3.82041	5.13441
Up	ENSG00000084070	2.41605	0.00944	SMAP2	1p34.2	protein_coding	2.13704	2.1311	4.70037	4.04465	4.81592	4.63954
Up	ENSG00000196074	2.41584	0.0626	SYCP2	20q13.33	protein_coding	0.56547	0.7678	3.02266	4.1112	1.97512	3.22093
Up	ENSG00000115183	2.41535	0.0157	TANC1	2q24.2	protein_coding	1.6203	1.39686	3.91625	4.4974	3.4094	3.87269
Up	ENSG00000147100	2.41352	0.0168	SLC16A2 ENSG00000147100	Xq13.2	protein_coding	0.876675	1.3692	3.4291	3.69823	3.00622	4.0123
Up	ENSG00000197355	2.41199	0.0665	UAP1L1	9q34.3	protein_coding	1.37468	1.2833	5.06185	3.53728	3.31629	3.04848
Up	ENSG00000142347	2.41133	0.0719	MYO1F	19p13.2	protein_coding	1.1669	1.55502	4.59127	3.60468	2.54282	4.35039
Up	ENSG00000169607	2.41097	0.0153	CKAP2L	2q14.1	protein_coding	0.0527511	0	2.42985	2.33526	1.95096	3.03331
Up	ENSG00000061987	2.4106	0.0371	MON2	12q14.1	protein_coding	2.64982	2.16878	4.56052	5.21773	4.01368	5.48769
Up	ENSG00000023608	2.41045	0.0282	SNAPC1	14q23.2	protein_coding	1.29923	1.04067	3.21454	4.29032	3.8451	2.97164
Up	ENSG00000120519	2.41023	0.0556	SLC10A7	4q31.22	protein_coding	0.509629	0.708933	3.04971	3.92666	1.92976	3.17191
Up	ENSG00000256087	2.40997	0.0683	ZNF432	19q13.41	protein_coding	1.7668	1.85244	5.31326	4.13071	3.08974	4.34466
Up	ENSG00000213713	2.40761	0.0404	PIGCP1	11p13	processed_pseudogene	1.46194	1.48542	4.8463	3.5417	3.18299	3.95419
Up	ENSG00000122218	2.40732	0.038	COPA	1q23.2	protein_coding	3.98552	4.76232	7.37857	7.08588	5.94212	6.7184
Up	ENSG00000144677	2.4072	0.0416	CTDSPL	3p22.2	protein_coding	2.77035	2.82697	4.82052	5.47788	4.44036	6.0847
Up	ENSG00000104774	2.40705	0.0339	MAN2B1	19p13.13	protein_coding	3.54987	3.40811	6.53212	5.48235	6.35212	5.17757
Up	ENSG00000142867	2.40607	0.0265	BCL10	1p22.3	protein_coding	1.05271	1.20875	2.82163	4.23165	3.67666	3.41728
Up	ENSG00000181026	2.40578	0.0374	AEN	15q26.1	protein_coding	0.994252	2.66907	4.36813	4.2871	4.16696	4.12761
Up	ENSG00000174695	2.40469	0.0672	TMEM167A	5q14.2	protein_coding	2.35149	2.79898	3.73016	5.64938	4.97181	5.56835
Up	ENSG00000198951	2.40439	0.0255	NAGA	22q13.2	protein_coding	1.59998	2.37092	4.06698	5.03108	3.96841	4.49289
Up	ENSG00000198142	2.40169	0.0801	SOWAHC	2q13	protein_coding	0.515964	0.767944	1.96823	3.80717	3.92184	2.47736
Up	ENSG00000166484	2.40066	0.0415	MAPK7	17p11.2	protein_coding	1.60087	2.16002	5.2337	3.84231	3.72525	4.32318
Up	ENSG00000126903	2.40061	0.0119	SLC10A3	Xq28	protein_coding	2.37765	2.79628	5.45053	4.91155	4.60421	4.98398
Up	ENSG00000110651	2.39973	0.0778	CD81	11p15.5	protein_coding	6.29175	6.10973	9.51783	8.8185	8.81783	7.24772
Up	ENSG00000109736	2.39871	0.0491	MFSD10	4p16.3	protein_coding	4.16505	3.47418	7.30675	5.91237	5.74316	5.91101
Up	ENSG00000092439	2.39674	0.0476	TRPM7	15q21.2	protein_coding	2.07281	1.71194	4.80693	4.16695	3.26689	4.91568
Up	ENSG00000258130	2.39597	0.0228		16p11.2	transcribed_unprocessed_pseudogene	0.693139	0	2.43883	2.26237	3.22907	3.03988
Up	ENSG00000164109	2.39559	0.0789	MAD2L1	4q27	protein_coding	1.18332	0.698868	3.47567	3.38857	2.08996	4.39254
Up	ENSG00000137699	2.39434	0.0903	TRIM29	11q23.3	protein_coding	0.221245	0	3.83621	1.35775	2.53171	2.29419
Up	ENSG00000100417	2.39394	0.0262	PMM1	22q13.2	protein_coding	3.28838	3.09369	6.16578	5.10683	5.07099	5.99629
Up	ENSG00000178996	2.39378	0.0928	SNX18	5q11.2	protein_coding	1.90679	1.81277	3.80212	5.21233	3.00434	4.99546
Up	ENSG00000259658	2.39291	0.00799		15q26.3	transcribed_unprocessed_pseudogene	1.24487	0.749503	3.42348	3.71528	3.23331	3.1883
Up	ENSG00000177548	2.39265	0.0853	RABEP2	16p11.2	protein_coding	2.31015	2.235	5.89058	3.45051	4.56838	4.75144
Up	ENSG00000167645	2.39194	0.0425	YIF1B	19q13.2	protein_coding	4.07289	4.327	7.117	6.33164	5.69164	7.22725
Up	ENSG00000167202	2.39141	0.0108	TBC1D2B	15q25.1	protein_coding	2.06844	2.0327	4.68628	3.93197	4.73402	4.41566
Up	ENSG00000105854	2.39097	0.0404	PON2	7q21.3	protein_coding	3.39389	3.15945	5.76026	6.30191	4.66494	5.94347
Up	ENSG00000185344	2.39084	0.0529	ATP6V0A2	12q24.31	protein_coding	1.41191	1.85609	5.00268	3.85705	3.10867	4.13096
Up	ENSG00000138834	2.39066	0.0848	MAPK8IP3	16p13.3	protein_coding	4.95392	4.39772	8.04785	6.08246	6.40069	7.73493
Up	ENSG00000019144	2.39038	0.0279	PHLDB1	11q23.3	protein_coding	5.10951	4.9465	8.12122	6.84882	7.00665	7.69686
Up	ENSG00000113621	2.39002	0.0355	TXNDC15	5q31.1	protein_coding	3.6357	4.72487	6.8208	7.06153	6.49589	5.90298
Up	ENSG00000099625	2.38978	0.0399	CBARP	19p13.3	protein_coding	0.559806	0.335584	3.47993	2.07533	2.41223	3.3824
Up	ENSG00000196912	2.38921	0.00972	ANKRD36B	2q11.2	protein_coding	1.0724	0.707989	3.66375	3.30005	2.89607	3.25775
Up	ENSG00000281385	2.38916	0.0323	AP2A2	CHR_HSCHR11_3_CTG1	protein_coding	2.63611	2.43553	5.38147	4.77713	4.08576	5.45555
Up	ENSG00000189171	2.38839	0.0273	S100A13	1q21.3	protein_coding	6.0593	7.32259	8.8199	9.09373	8.92098	9.48273
Up	ENSG00000131652	2.38778	0.0597	THOC6	16p13.3	protein_coding	3.64348	3.21581	5.57839	4.96885	6.95654	5.76591
Up	ENSG00000136938	2.38702	0.0342	ANP32B	9q22.33	protein_coding	4.91391	5.6237	7.33535	6.99039	8.07538	8.22218
Up	ENSG00000181830	2.38691	0.0153	SLC35C1	11p11.2	protein_coding	1.38182	1.57834	4.46712	3.90655	3.52426	3.57003
Up	ENSG00000153914	2.38629	0.0552	SREK1	5q12.3	protein_coding	3.48287	3.30224	4.96662	6.70908	6.1932	5.2465
Up	ENSG00000106392	2.38597	0.0283	C1GALT1	7p22.1	protein_coding	1.56321	1.2363	3.19766	3.97003	3.45126	4.52396
Up	ENSG00000116977	2.38558	0.0266	LGALS8	1q43	protein_coding	2.81604	2.87544	4.37495	5.6704	5.37062	5.50932
Up	ENSG00000164087	2.38489	0.0965	POC1A	3p21.2	protein_coding	0.076176	0.697604	2.96676	2.0001	1.98099	4.13926
Up	ENSG00000002586	2.38455	0.0862	CD99	Xp22.33	protein_coding	6.16189	6.97189	9.3486	9.46774	9.45193	7.53746
Up	ENSG00000158792	2.38411	0.0176	SPATA2L	16q24.3	protein_coding	0.517989	0.431054	3.03085	2.31134	3.42036	2.67196
Up	ENSG00000140025	2.38371	0.0326	EFCAB11	14q32.11	protein_coding	0.717438	0.380882	3.58001	3.29234	2.17395	2.68517
Up	ENSG00000140262	2.3834	0.0461	TCF12	15q21.3	protein_coding	2.16071	2.91179	5.94314	4.70677	4.57758	4.45112
Up	ENSG00000125354	2.38158	0.013	SEPTIN6	Xq24	protein_coding	1.2675	1.24687	3.50816	4.23569	3.47162	3.3396
Up	ENSG00000114573	2.38082	0.0168	ATP6V1A	3q13.31	protein_coding	1.76794	1.29012	3.71415	4.24083	3.41237	4.27208
Up	ENSG00000198753	2.38075	0.0901	PLXNB3	Xq28	protein_coding	0.768856	0.452865	3.57109	2.51546	1.82451	4.05539
Up	ENSG00000164543	2.38025	0.066	STK17A	7p13	protein_coding	1.65288	2.18246	3.45614	5.20576	4.85319	3.67661
Up	ENSG00000257727	2.37833	0.0319	CNPY2	12q13.3	protein_coding	5.19042	4.83485	7.52307	7.55311	6.51505	7.97263
Up	ENSG00000108479	2.37812	0.0625	GALK1	17q25.1	protein_coding	3.00089	2.88557	6.33299	5.03847	4.29625	5.61769
Up	ENSG00000101109	2.37805	0.0527	STK4	20q13.12	protein_coding	0.961318	0.954631	3.10412	3.27692	2.53102	4.43206
Up	ENSG00000185475	2.37722	0.0235	TMEM179B	11q12.3	protein_coding	3.59031	3.38669	5.79462	6.50763	5.1906	5.97002
Up	ENSG00000091651	2.37706	0.0412	ORC6	16q11.2	protein_coding	1.56239	1.56027	4.32447	3.45041	3.23599	4.74271
Up	ENSG00000093000	2.37608	0.014	NUP50	22q13.31	protein_coding	1.72198	1.77365	4.73188	3.90738	3.79688	4.05944
Up	ENSG00000173264	2.37586	0.0338	GPR137	11q13.1	protein_coding	3.35578	3.09259	6.32334	5.81637	4.79675	5.46369
Up	ENSG00000068697	2.37385	0.0509	LAPTM4A	2p24.1	protein_coding	5.55926	6.04659	7.28127	9.1367	8.19349	8.09566
Up	ENSG00000168411	2.37374	0.0649	RFWD3	16q23.1	protein_coding	1.26505	0.935967	4.44337	3.03614	2.50519	3.9123
Up	ENSG00000141458	2.37368	0.0275	NPC1	18q11.2	protein_coding	2.4477	3.10106	4.57479	4.9156	5.80468	5.29716
Up	ENSG00000213999	2.37155	0.0923	MEF2B	19p13.11	protein_coding	0.231046	0.410654	3.81113	1.60934	2.07717	3.27195
Up	ENSG00000188529	2.3711	0.0255	SRSF10	1p36.11	protein_coding	4.15807	3.42164	5.45111	6.45888	6.26332	6.47051
Up	ENSG00000170037	2.3709	0.0857	CNTROB	17p13.1	protein_coding	3.10756	2.38265	6.45291	4.43409	4.45629	5.12071
Up	ENSG00000183580	2.37008	0.0429	FBXL7	5p15.1	protein_coding	1.19354	1.03928	4.21968	3.01333	3.97458	2.73836
Up	ENSG00000103226	2.36967	0.0291	NOMO3	16p13.11	protein_coding	2.61338	1.79068	4.7081	4.61952	3.87643	5.08274
Up	ENSG00000119537	2.36928	0.0409	KDSR	18q21.33	protein_coding	2.23647	3.43979	4.46192	5.52918	5.54937	5.28919
Up	ENSG00000157637	2.36917	0.0966	SLC38A10	17q25.3	protein_coding	3.92491	4.00788	7.27381	7.12648	5.84314	5.0988
Up	ENSG00000160606	2.36889	0.0402	TLCD1	17q11.2	protein_coding	0.312348	0.433626	2.93422	3.56343	1.88471	2.58517
Up	ENSG00000197943	2.36867	0.0265	PLCG2 ENSG00000197943	16q23.3	protein_coding	0.691226	1.02257	3.44359	3.39573	2.40073	3.66223
Up	ENSG00000170876	2.36659	0.0291	TMEM43	3p25.1	protein_coding	3.27059	3.57388	5.09913	5.53234	6.07994	6.44388
Up	ENSG00000149499	2.36635	0.0577	EML3	11q12.3	protein_coding	4.20286	4.37131	7.58057	5.58548	6.83493	6.61277
Up	ENSG00000149639	2.36541	0.0588	SOGA1 ENSG00000149639	20q11.23	protein_coding	1.06314	1.15121	4.3755	3.32229	2.40084	3.79172
Up	ENSG00000228867	2.36525	0.0109	NRM	CHR_HSCHR6_MHC_MANN_CTG1	protein_coding	1.88388	1.12048	4.113	3.72641	3.70409	3.92622
Up	ENSG00000166801	2.3638	0.0854	FAM111A	11q12.1	protein_coding	1.35128	1.08423	4.49822	4.1517	2.28175	3.39453
Up	ENSG00000184216	2.36211	0.0771	IRAK1	Xq28	protein_coding	3.54783	4.4603	6.95067	5.20494	6.20973	7.09936
Up	ENSG00000206208	2.36094	0.0866	TAPBP	CHR_HSCHR6_MHC_MCF_CTG1	protein_coding	3.527	2.65073	6.50506	5.7742	5.2071	4.31282
Up	ENSG00000107833	2.35985	0.0537	NPM3	10q24.32	protein_coding	3.17035	1.43728	4.20311	4.80146	5.07139	4.57869
Up	ENSG00000172935	2.35893	0.0719	MRGPRF	11q13.3	protein_coding	1.46775	1.22287	3.52687	2.92355	5.01193	3.35462
Up	ENSG00000176148	2.35853	0.0326	TCP11L1	11p13	protein_coding	1.84152	1.22704	4.55256	4.15977	3.21609	3.64283
Up	ENSG00000164253	2.35677	0.0252	WDR41	5q14.1	protein_coding	2.60632	3.46285	4.88862	5.68272	5.16693	5.82717
Up	ENSG00000198900	2.35663	0.0491	TOP1	20q12	protein_coding	2.55701	2.50359	4.10008	4.97136	5.90701	4.5693
Up	ENSG00000271672	2.3565	0.0167	DUXAP8	22q11.1	transcribed_processed_pseudogene	0	0	2.80642	2.66174	1.83432	2.1235
Up	ENSG00000135749	2.35577	0.0463	PCNX2	1q42.2	protein_coding	1.11199	0.115249	3.34843	3.64492	2.33499	2.54921
Up	ENSG00000156030	2.35533	0.0369	MIDEAS	14q24.3	protein_coding	2.75693	2.33711	4.84007	5.67582	5.0028	4.09071
Up	ENSG00000102580	2.3553	0.017	DNAJC3	13q32.1	protein_coding	1.36573	1.88948	3.54269	3.93516	4.53511	3.91865
Up	ENSG00000143368	2.35444	0.0191	SF3B4	1q21.2	protein_coding	2.74857	3.30649	5.8208	4.85224	5.21826	5.6366
Up	ENSG00000090863	2.35414	0.0295	GLG1	16q23.1	protein_coding	4.06929	4.75145	6.93966	7.37883	6.09107	6.64847
Up	ENSG00000117448	2.35318	0.0285	AKR1A1	1p34.1	protein_coding	4.46596	4.25709	6.67071	6.45159	6.18779	7.54872
Up	ENSG00000281379	2.35288	0.0793	SEPTIN14P19	19p13.3	transcribed_unprocessed_pseudogene	0	0	3.10805	2.75978	0.964735	2.57896
Up	ENSG00000164038	2.35201	0.0199	SLC9B2	4q24	protein_coding	1.01521	1.45219	3.44654	4.19361	3.62753	3.07519
Up	ENSG00000197343	2.35044	0.0197	ZNF655	7q22.1	protein_coding	3.09007	3.05688	5.55539	5.40057	5.96802	4.77166
Up	ENSG00000118640	2.34977	0.0326	VAMP8	2p11.2	protein_coding	3.27342	3.29461	5.1147	5.33832	5.53319	6.54895
Up	ENSG00000197299	2.34961	0.0594	BLM	15q26.1	protein_coding	0.274623	0.385594	3.27373	1.99228	1.93557	3.51731
Up	ENSG00000277773	2.34958	0.0573	SMN2	CHR_HSCHR5_2_CTG1_1	protein_coding	1.23511	2.63498	4.23415	3.61275	5.0364	4.2552
Up	ENSG00000246575	2.34917	0.0732		2p11.2	unprocessed_pseudogene	0.23872	0.256773	2.94485	2.42369	1.42568	3.59341
Up	ENSG00000058668	2.34847	0.0449	ATP2B4	1q32.1	protein_coding	3.28404	2.37872	5.41252	4.23469	5.53221	5.53998
Up	ENSG00000180964	2.34816	0.0293	TCEAL8	Xq22.1	protein_coding	3.20837	2.74579	4.8593	6.16128	5.13466	5.14571
Up	ENSG00000139624	2.34811	0.0137	CERS5	12q13.12	protein_coding	3.37053	3.29756	5.59386	5.29713	5.57969	6.25795
Up	ENSG00000135414	2.34791	0.0456	GDF11	12q13.2	protein_coding	0.646993	1.52419	4.24044	3.31751	2.66965	3.50639
Up	ENSG00000168679	2.34728	0.059	SLC16A4	1p13.3	protein_coding	0.68107	0.187655	3.10609	3.72819	1.88364	2.40865
Up	ENSG00000109787	2.3462	0.0575	KLF3	4p14	protein_coding	1.7147	1.98531	3.46048	4.15521	5.33307	3.83606
Up	ENSG00000126456	2.34529	0.0641	IRF3	19q13.33	protein_coding	4.6339	4.27923	7.95536	6.39864	5.98211	6.87131
Up	ENSG00000084693	2.34413	0.0692	AGBL5	2p23.3	protein_coding	2.43548	2.63274	4.87569	5.79075	3.67377	5.17277
Up	ENSG00000166479	2.34302	0.0188	TMX3	18q22.1	protein_coding	2.28746	2.1924	3.86473	4.82137	4.88497	4.76071
Up	ENSG00000166833	2.34265	0.0697	NAV2	11p15.1	protein_coding	1.35417	1.11412	4.25634	4.37055	2.52792	3.15238
Up	ENSG00000273780	2.34261	0.0195	ARHGAP23	CHR_HSCHR17_7_CTG4	protein_coding	2.42396	2.11654	4.19729	4.24447	4.82889	5.18079
Up	ENSG00000167785	2.3421	0.0109	ZNF558	19p13.2	protein_coding	1.31995	2.11042	4.16888	4.22475	3.92501	3.91046
Up	ENSG00000196476	2.34144	0.0751	C20orf96	20p13	protein_coding	1.38097	0.996163	4.04392	2.91519	2.62362	4.53732
Up	ENSG00000138738	2.3386	0.0234	PRDM5	4q27	protein_coding	1.25972	1.04526	2.91033	4.08948	3.2075	3.75704
Up	ENSG00000163933	2.33805	0.0281	RFT1	3p21.1	protein_coding	1.39936	1.44118	3.37597	3.78238	3.29616	4.57875
Up	ENSG00000124116	2.3371	0.0625	WFDC3	20q13.12	protein_coding	1.57742	0	3.91863	2.84568	3.06894	2.67001
Up	ENSG00000130202	2.3371	0.0767	NECTIN2	19q13.32	protein_coding	3.66055	4.32373	6.27993	5.51784	7.57873	5.94046
Up	ENSG00000132646	2.33685	0.0354	PCNA	20p12.3	protein_coding	3.14873	3.44953	5.48811	6.24231	4.79891	6.01461
Up	ENSG00000149260	2.3366	0.0118	CAPN5	11q13.5	protein_coding	0.925317	0.769187	3.64932	3.30288	2.83244	2.95079
Up	ENSG00000116497	2.33347	0.0678	S100PBP	1p35.1	protein_coding	1.9641	2.22054	5.34021	4.91311	3.38505	4.0648
Up	ENSG00000171928	2.33284	0.0618	TVP23B	17p11.2	protein_coding	1.75863	2.32266	3.97734	5.34385	3.48923	4.68351
Up	ENSG00000004700	2.33204	0.0354	RECQL	12p12.1	protein_coding	2.51182	2.04573	3.80596	4.55295	4.77768	5.30668
Up	ENSG00000090889	2.33165	0.0401	KIF4A	Xq13.1	protein_coding	0	0	2.39414	2.32799	1.45936	3.14511
Up	ENSG00000144591	2.33088	0.0601	GMPPA	2q35	protein_coding	3.61543	3.54117	6.46044	5.71671	4.81728	6.6423
Up	ENSG00000182118	2.33056	0.0995	FAM89A	1q42.2	protein_coding	1.83169	1.99067	4.40824	5.64727	3.40635	3.50512
Up	ENSG00000138092	2.32998	0.0223	CENPO ENSG00000138092	2p23.3	protein_coding	0.958238	1.24304	4.05096	3.26805	2.83867	3.5648
Up	ENSG00000143036	2.3284	0.0214	SLC44A3	1p21.3	protein_coding	0.0694327	0.22629	3.22569	2.14532	2.34737	2.18667
Up	ENSG00000140564	2.32802	0.0339	FURIN	15q26.1	protein_coding	3.51173	4.93302	6.86897	6.41215	6.27328	6.64721
Up	ENSG00000198795	2.32802	0.0215	ZNF521	18q11.2	protein_coding	1.9127	2.33355	4.65673	4.77569	3.73181	4.64035
Up	ENSG00000109323	2.32674	0.0384	MANBA	4q24	protein_coding	2.28799	1.28101	3.71006	4.6877	4.44198	3.60522
Up	ENSG00000108774	2.32497	0.0174	RAB5C	17q21.2	protein_coding	3.96991	4.43365	6.38079	5.99751	6.86977	6.85894
Up	ENSG00000149480	2.32461	0.0316	MTA2	11q12.3	protein_coding	3.49971	3.48476	5.32399	5.24891	6.26546	6.42901
Up	ENSG00000271383	2.32088	0.0236	NBPF19	1q21.2	protein_coding	1.76511	2.06992	4.1878	4.5665	4.67679	3.52247
Up	ENSG00000102098	2.32018	0.0573	SCML2	Xp22.13	protein_coding	0.202297	0.186341	2.4333	3.21879	1.4121	2.99381
Up	ENSG00000170049	2.3201	0.0286	KCNAB3	17p13.1	protein_coding	0.569547	0.0594993	2.2257	2.20765	2.73118	3.37397
Up	ENSG00000177200	2.31857	0.0349	CHD9	16q12.2	protein_coding	2.75379	2.09177	4.8368	5.52617	4.25041	4.35202
Up	ENSG00000186153	2.31824	0.0241	WWOX	16q23.1	protein_coding	2.35138	3.07052	4.80732	5.58758	5.17798	4.54389
Up	ENSG00000163946	2.31763	0.0105	TASOR	3p14.3	protein_coding	2.39047	2.14239	4.59776	5.00872	4.53143	4.19833
Up	ENSG00000141570	2.31691	0.0167	CBX8	17q25.3	protein_coding	1.72666	0.882012	3.76413	3.20486	3.69871	3.81728
Up	ENSG00000165905	2.31668	0.0324	LARGE2	11p11.2	protein_coding	0	0	2.14033	3.12755	1.63371	2.36514
Up	ENSG00000100297	2.31601	0.0719	MCM5	22q12.3	protein_coding	2.84722	2.51119	5.75938	4.2406	4.21592	5.76497
Up	ENSG00000109066	2.31581	0.0571	TMEM104	17q25.1	protein_coding	1.42558	1.93172	3.80718	3.79898	3.27604	5.09566
Up	ENSG00000145715	2.31516	0.0497	RASA1	5q14.3	protein_coding	1.91386	1.89071	4.4271	4.9886	3.18099	4.27306
Up	ENSG00000169180	2.31379	0.0253	XPO6 ENSG00000169180	16p12.1	protein_coding	4.04354	3.85065	6.25614	5.52538	6.43636	6.82566
Up	ENSG00000059758	2.31194	0.0234	CDK17	12q23.1	protein_coding	1.88222	1.87358	3.59556	4.36493	4.83275	3.96613
Up	ENSG00000064655	2.31075	0.0968	EYA2	20q13.12	protein_coding	0.518452	0.553737	3.8402	1.74457	2.22358	3.57902
Up	ENSG00000172932	2.31043	0.067	ANKRD13D	11q13.2	protein_coding	3.52966	2.91317	6.45325	4.63648	5.06538	5.97227
Up	ENSG00000099337	2.30948	0.044	KCNK6	19q13.2	protein_coding	1.71208	1.01062	4.45923	3.62322	2.8665	3.73437
Up	ENSG00000160602	2.30916	0.0799	NEK8	17q11.2	protein_coding	0.757222	0.586073	4.06516	2.53605	1.94173	3.38029
Up	ENSG00000154040	2.30889	0.0517	CABYR	18q11.2	protein_coding	1.0383	1.48007	3.7808	3.45325	2.62417	4.41409
Up	ENSG00000163918	2.3078	0.0417	RFC4	3q27.3	protein_coding	1.84917	2.02806	4.47512	3.91452	3.50354	5.09248
Up	ENSG00000172795	2.30724	0.0214	DCP2	5q22.2	protein_coding	1.14693	1.37768	2.85317	3.97186	3.8202	3.63298
Up	ENSG00000147439	2.30668	0.0695	BIN3	8p21.3	protein_coding	2.75919	2.13222	5.05207	3.64321	5.64443	4.66983
Up	ENSG00000110330	2.3065	0.0237	BIRC2	11q22.2	protein_coding	3.56192	3.31888	5.13441	6.14801	6.2158	5.48937
Up	ENSG00000153885	2.30504	0.0803	KCTD15 ENSG00000153885	19q13.11	protein_coding	3.59679	2.58172	6.14498	4.9967	4.40128	6.03422
Up	ENSG00000185650	2.30467	0.0215	ZFP36L1	14q24.1	protein_coding	4.83412	4.44392	6.89535	6.29653	7.41935	7.16352
Up	ENSG00000188343	2.30456	0.0178	CIBAR1	8q22.1	protein_coding	2.61538	2.9214	5.01983	5.25351	4.4846	5.5339
Up	ENSG00000244509	2.30366	0.065	APOBEC3C	22q13.1	protein_coding	0.626795	0.886997	4.25413	2.32673	3.02611	2.63526
Up	ENSG00000142657	2.30332	0.0307	PGD	1p36.22	protein_coding	3.20448	3.82008	5.50721	5.25374	6.48854	6.01292
Up	ENSG00000118200	2.30318	0.0476	CAMSAP2	1q32.1	protein_coding	1.17954	1.09972	2.62672	3.86962	4.23321	3.04169
Up	ENSG00000106609	2.30107	0.0318	TMEM248	7q11.21	protein_coding	3.17809	3.49021	5.03353	5.71691	5.36065	6.42981
Up	ENSG00000262246	2.30066	0.0512	CORO7	16p13.3	protein_coding	2.3708	2.04952	5.50495	3.70205	4.53328	4.30301
Up	ENSG00000153029	2.30039	0.0572	MR1	1q25.3	protein_coding	1.04945	0.676276	3.44798	4.10252	2.80137	2.30112
Up	ENSG00000100299	2.29879	0.0533	ARSA	22q13.33	protein_coding	3.82948	3.42608	7.00512	5.83548	5.27689	5.5888
Up	ENSG00000166012	2.29878	0.0153	TAF1D	11q21	protein_coding	4.93023	4.94925	6.86018	7.661	6.89043	7.54244
Up	ENSG00000107331	2.2977	0.0407	ABCA2	9q34.3	protein_coding	3.34012	3.10547	6.31485	4.95289	4.96282	5.85142
Up	ENSG00000111605	2.29646	0.0145	CPSF6	12q15	protein_coding	2.64927	2.95257	4.79254	4.98093	4.94368	5.67236
Up	ENSG00000166881	2.29627	0.0506	NEMP1	12q13.3	protein_coding	0.920776	0.439391	3.36473	3.07227	1.92338	3.54504
Up	ENSG00000051825	2.29618	0.0909	MPHOSPH9	12q24.31	protein_coding	2.63629	2.09536	5.27507	4.39158	3.42775	5.55361
Up	ENSG00000125170	2.29608	0.00997	DOK4	16q21	protein_coding	1.39686	1.12087	4.01779	3.31847	3.45084	3.43269
Up	ENSG00000168092	2.29533	0.00907	PAFAH1B2	11q23.3	protein_coding	2.38202	2.70103	4.95603	4.7829	4.46796	5.14051
Up	ENSG00000068438	2.29341	0.0559	FTSJ1	Xp11.23	protein_coding	3.17875	3.33133	5.77062	4.49796	6.38047	5.54477
Up	ENSG00000031081	2.29244	0.0232	ARHGAP31	3q13.32	protein_coding	1.09026	1.09622	3.47255	3.93143	2.6724	3.46633
Up	ENSG00000204272	2.29114	0.0324	NBDY	Xp11.21	protein_coding	2.23792	1.85797	3.65788	4.73261	4.92726	4.03861
Up	ENSG00000182670	2.29107	0.017	TTC3	21q22.13	protein_coding	3.90917	3.80392	5.84721	6.70342	5.73715	6.30269
Up	ENSG00000176903	2.29097	0.0286	PNMA1	14q24.3	protein_coding	2.18448	2.75372	4.74277	5.2364	5.03801	4.02312
Up	ENSG00000163781	2.29013	0.017	TOPBP1	3q22.1	protein_coding	1.5969	1.94024	4.38749	3.76612	3.62593	4.45527
Up	ENSG00000226882	2.28967	0.0443	GNL1	CHR_HSCHR6_MHC_SSTO_CTG1	protein_coding	3.52344	2.33836	5.96132	5.1134	5.04697	4.76058
Up	ENSG00000278644	2.28806	0.0407	PCGF2	CHR_HSCHR17_7_CTG4	protein_coding	3.01144	2.58772	6.06513	4.82577	4.62661	4.83305
Up	ENSG00000183684	2.2869	0.00673	ALYREF	17q25.3	protein_coding	4.19185	4.7745	6.63475	6.88404	6.81202	6.74949
Up	ENSG00000141198	2.28657	0.0169	TOM1L1	17q22	protein_coding	1.3337	1.49513	3.60844	4.25831	3.19757	3.73963
Up	ENSG00000213281	2.28616	0.0465	NRAS	1p13.2	protein_coding	1.85941	1.43076	2.8856	4.14808	4.38935	4.30194
Up	ENSG00000162694	2.2858	0.0219	EXTL2	1p21.2	protein_coding	1.68964	1.67855	3.50797	4.67167	3.72019	3.97973
Up	ENSG00000133895	2.28562	0.0575	MEN1	11q13.1	protein_coding	3.04843	2.32399	5.51882	5.26981	3.8832	5.2155
Up	ENSG00000284308	2.28486	0.0189	C2orf81	2p13.1	protein_coding	0.660081	0.156489	2.16705	3.05519	3.01662	2.53374
Up	ENSG00000134758	2.28476	0.0241	RNF138	18q12.1	protein_coding	1.94389	1.54491	3.3724	4.42363	3.89105	4.42958
Up	ENSG00000138758	2.28443	0.0538	SEPTIN11	4q21.1	protein_coding	2.91276	4.17291	6.32683	5.69767	6.213	5.07157
Up	ENSG00000272104	2.284	0.0651		3p21.31	protein_coding	0	0	3.02534	1.88073	1.28648	2.94342
Up	ENSG00000180438	2.28357	0.0238	TPRXL	3p25.1	transcribed_processed_pseudogene	0.563459	0.43039	2.99362	3.30619	2.06908	2.75307
Up	ENSG00000128709	2.28282	0.0185	HOXD9	2q31.1	protein_coding	0.933777	0.417307	3.28243	3.21522	2.37289	2.9629
Up	ENSG00000121281	2.28215	0.0385	ADCY7	16q12.1	protein_coding	0.937079	1.30267	3.83542	3.82189	3.48405	2.46673
Up	ENSG00000072609	2.28213	0.0304	CHFR	12q24.33	protein_coding	2.65799	2.47105	5.68979	4.32427	4.61981	4.75275
Up	ENSG00000165915	2.28192	0.0733	SLC39A13	11p11.2	protein_coding	4.16581	4.69297	7.88129	6.73443	5.8405	6.38901
Up	ENSG00000135541	2.28163	0.0102	AHI1	6q23.3	protein_coding	2.63792	1.8673	4.37031	4.55383	4.65111	4.56173
Up	ENSG00000170379	2.28153	0.0299	TCAF2	7q35	protein_coding	0.201193	0.14414	2.67156	2.377	1.68476	3.08347
Up	ENSG00000113282	2.28137	0.0105	CLINT1	5q33.3	protein_coding	3.55562	4.36253	6.20232	6.18805	6.20623	6.36517
Up	ENSG00000099999	2.28073	0.0236	RNF215	22q12.2	protein_coding	2.5958	1.93988	5.22296	4.36199	4.26615	4.34317
Up	ENSG00000125912	2.27953	0.0579	NCLN	19p13.3	protein_coding	3.42367	4.01901	6.49593	5.27746	5.43342	6.79666
Up	ENSG00000077514	2.27949	0.0946	POLD3	11q13.4	protein_coding	2.22677	1.54947	4.2278	4.63413	2.81335	4.99516
Up	ENSG00000163482	2.27948	0.0341	STK36	2q35	protein_coding	3.40558	2.75373	5.80221	5.47654	4.53714	5.62062
Up	ENSG00000159479	2.27823	0.0191	MED8	1p34.2	protein_coding	2.7064	3.03229	5.19003	5.35098	4.50469	5.54462
Up	ENSG00000149591	2.2779	0.0253	TAGLN	11q23.3	protein_coding	7.12992	6.16046	8.968	8.63467	9.4285	8.66121
Up	ENSG00000170144	2.27689	0.00526	HNRNPA3	2q31.2	protein_coding	4.95399	5.1912	7.13745	7.40202	7.59676	7.2617
Up	ENSG00000085999	2.27675	0.0656	RAD54L	1p34.1	protein_coding	0.5737	1.46383	4.32095	3.40742	2.85691	2.59677
Up	ENSG00000113460	2.27585	0.0769	BRIX1	5p13.2	protein_coding	2.1828	2.19031	3.17599	4.49441	5.19449	4.98473
Up	ENSG00000183291	2.27541	0.0456	SELENOF ENSG00000183291	1p22.3	protein_coding	4.55587	4.54246	5.76574	7.05056	7.16494	7.31704
Up	ENSG00000213397	2.27533	0.0956	HAUS7	Xq28	protein_coding	3.94703	3.34924	7.22114	4.88275	5.87043	5.71954
Up	ENSG00000118855	2.27522	0.0152	MFSD1	3q25.32	protein_coding	2.45049	2.86631	4.39208	5.12252	5.25022	4.96966
Up	ENSG00000151491	2.27509	0.0512	EPS8	12p12.3	protein_coding	3.12149	2.84701	4.85456	6.28967	5.2905	4.6026
Up	ENSG00000197568	2.27492	0.0401	HHLA3	1p31.1	lncRNA	1.39204	1.10611	4.39673	3.48305	3.42552	2.79068
Up	ENSG00000137462	2.27425	0.0431	TLR2	4q31.3	protein_coding	0.504988	0.183274	1.86885	2.2331	3.04947	3.32211
Up	ENSG00000143418	2.27219	0.043	CERS2	1q21.3	protein_coding	3.96758	4.39808	5.98982	6.6547	5.86234	7.31323
Up	ENSG00000196371	2.27095	0.00782	FUT4	11q21	protein_coding	0.311827	0.411001	2.30435	2.99652	2.62715	2.60144
Up	ENSG00000167992	2.27048	0.0977	VWCE	11q12.2	protein_coding	1.59325	0.296457	4.4956	2.86035	2.79664	2.70872
Up	ENSG00000066117	2.27043	0.0401	SMARCD1	12q13.12	protein_coding	3.19641	3.28095	5.25838	4.96203	5.33423	6.48181
Up	ENSG00000175183	2.2703	0.0832	CSRP2	12q21.2	protein_coding	3.54604	2.90588	5.3544	5.03492	4.79701	6.79872
Up	ENSG00000206527	2.26964	0.078	HACD2	3q21.1	protein_coding	1.64039	1.25389	3.05932	4.50621	2.83215	4.46944
Up	ENSG00000275118	2.26843	0.0113	MBOAT7	CHR_HSCHR19_4_CTG3_1	protein_coding	0.690243	1.41217	3.51029	3.22874	3.09722	3.4423
Up	ENSG00000136527	2.26643	0.0552	TRA2B	3q27.2	protein_coding	4.49879	4.47445	5.79898	7.68604	6.82191	6.70529
Up	ENSG00000171793	2.26528	0.0379	CTPS1	1p34.2	protein_coding	2.41	2.84234	4.74053	4.06623	5.39505	5.364
Up	ENSG00000173218	2.26411	0.0853	VANGL1	1p13.1	protein_coding	0.34656	0.322106	1.97626	2.4476	1.99472	3.97518
Up	ENSG00000169379	2.26385	0.0258	ARL13B	3q11.1	protein_coding	0.749327	0.346585	2.21391	3.4353	2.62923	2.9688
Up	ENSG00000166689	2.26335	0.022	PLEKHA7	11p15.1	protein_coding	1.73466	1.88118	4.75055	4.12953	3.65497	3.75002
Up	ENSG00000121753	2.26218	0.0901	ADGRB2	1p35.2	protein_coding	0.956573	0.767346	4.38878	2.94023	3.11248	2.05507
Up	ENSG00000108784	2.2618	0.0904	NAGLU	17q21.2	protein_coding	2.78048	3.12012	5.94436	6.09481	4.65902	4.15023
Up	ENSG00000217555	2.26171	0.0212	CKLF	16q21	protein_coding	3.35062	2.95121	4.93489	5.64888	5.12415	5.94258
Up	ENSG00000146842	2.26138	0.0928	TMEM209	7q32.2	protein_coding	1.20814	1.20035	3.45505	4.11037	2.08543	4.21167
Up	ENSG00000165138	2.26069	0.0608	ANKS6	9q22.33	protein_coding	1.90647	2.00539	5.31697	4.32815	3.6423	3.57906
Up	ENSG00000123983	2.26064	0.0538	ACSL3	2q36.1	protein_coding	3.07136	3.12131	4.3817	5.66887	6.17352	5.2038
Up	ENSG00000144589	2.26051	0.0902	STK11IP	2q35	protein_coding	3.63442	3.05876	5.86745	4.42532	5.46105	6.6746
Up	ENSG00000127463	2.26019	0.0745	EMC1	1p36.13	protein_coding	3.3689	3.63976	5.60977	6.30042	4.59043	6.55748
Up	ENSG00000066279	2.25939	0.0562	ASPM	1q31.3	protein_coding	0	0	1.83971	2.41507	1.50448	3.2783
Up	ENSG00000163637	2.25865	0.0416	PRICKLE2	3p14.1	protein_coding	0.815487	0.647937	2.83893	3.45219	3.56909	2.10125
Up	ENSG00000074266	2.25847	0.00382	EED	11q14.2	protein_coding	2.18858	2.33912	4.408	4.65818	4.38246	4.64065
Up	ENSG00000225060	2.2569	0.0923	PPP1R18	CHR_HSCHR6_MHC_MCF_CTG1	protein_coding	2.0362	2.08336	4.35301	3.47067	5.66917	3.77387
Up	ENSG00000187514	2.25674	0.0136	PTMA	2q37.1	protein_coding	7.85881	7.45992	9.74453	9.56628	10.3765	9.97708
Up	ENSG00000163950	2.25662	0.00799	SLBP	4p16.3	protein_coding	2.61495	3.17339	5.038	4.99409	5.19127	5.37982
Up	ENSG00000168175	2.25586	0.012	MAPK1IP1L ENSG00000168175	14q22.3	protein_coding	3.08728	3.49949	5.77207	5.87418	5.29009	5.26062
Up	ENSG00000198160	2.25586	0.0118	MIER1	1p31.3	protein_coding	1.83935	1.80803	3.5894	4.35944	4.03744	4.33189
Up	ENSG00000147155	2.25571	0.0577	EBP	Xp11.23	protein_coding	2.89226	2.25603	4.58549	4.0143	4.93344	5.7862
Up	ENSG00000160055	2.25486	0.0659	TMEM234	1p35.2	protein_coding	1.89685	1.47214	4.89544	3.9928	2.89212	3.97708
Up	ENSG00000240184	2.25367	0.0537	PCDHGC3	5q31.3	protein_coding	4.2714	3.87707	7.31753	5.58834	6.41452	5.99122
Up	ENSG00000137166	2.25325	0.0554	FOXP4	6p21.1	protein_coding	2.71613	3.11407	6.02253	5.14873	4.19667	5.30546
Up	ENSG00000125812	2.25313	0.0683	GZF1	20p11.21	protein_coding	1.71501	1.83053	3.46727	5.28719	3.75772	3.59145
Up	ENSG00000105202	2.253	0.00939	FBL	19q13.2	protein_coding	5.51061	5.49355	7.89053	7.70565	7.34672	8.07745
Up	ENSG00000132475	2.25193	0.0844	H3-3B	17q25.1	protein_coding	7.79106	7.2884	8.43359	10.2302	10.362	10.1408
Up	ENSG00000117862	2.2514	0.0145	TXNDC12	1p32.3	protein_coding	2.28242	2.9385	4.55348	5.2358	4.94856	4.70957
Up	ENSG00000151014	2.25135	0.0361	NOCT	4q31.1	protein_coding	1.61694	1.76573	3.74291	4.29461	4.58195	3.15127
Up	ENSG00000184205	2.25055	0.0266	TSPYL2	Xp11.22	protein_coding	4.49089	4.08244	6.23817	6.8196	7.11374	5.97735
Up	ENSG00000148346	2.24961	0.0534	LCN2	9q34.11	protein_coding	0	0	1.24753	2.16836	2.55388	3.02868
Up	ENSG00000284832	2.24935	0.046	POLR2A	CHR_HG2046_PATCH	protein_coding	2.07705	2.35233	4.81876	4.95912	3.43277	4.64549
Up	ENSG00000167535	2.24885	0.0757	CACNB3	12q13.12	protein_coding	2.5314	0.92545	3.95649	3.19037	4.13006	4.63218
Up	ENSG00000127399	2.24731	0.0833	LRRC61	7q36.1	protein_coding	0.655139	1.89826	3.92936	3.38804	2.50042	4.27823
Up	ENSG00000132005	2.24649	0.00969	RFX1	19p13.12	protein_coding	2.19894	2.10464	4.82504	4.35067	4.35015	4.06727
Up	ENSG00000180879	2.2464	0.0124	SSR4	Xq28	protein_coding	6.48739	6.30939	8.25608	9.04731	8.44829	8.82747
Up	ENSG00000269713	2.24572	0.0107	NBPF9	1q21.2	protein_coding	1.51367	1.40234	3.61612	3.76088	4.12125	3.31667
Up	ENSG00000155850	2.24556	0.0543	SLC26A2	5q32	protein_coding	0.669055	0.550904	2.95206	3.88403	2.40273	2.18332
Up	ENSG00000167291	2.24533	0.044	TBC1D16	17q25.3	protein_coding	1.34207	1.45116	4.61956	3.00771	3.51808	3.42242
Up	ENSG00000132432	2.24467	0.0168	SEC61G	7p11.2	protein_coding	6.35838	6.14667	7.9	8.56489	8.8968	8.62707
Up	ENSG00000105223	2.24465	0.0951	PLD3	19q13.2	protein_coding	6.35314	6.47301	9.8896	8.98718	7.73563	8.0185
Up	ENSG00000117262	2.2446	0.0906	GPR89A	1q21.1	protein_coding	1.61382	2.56443	3.80261	4.77195	3.42147	5.33888
Up	ENSG00000024422	2.24409	0.0701	EHD2	19q13.33	protein_coding	4.42263	3.9195	7.63077	6.25197	5.98766	5.79021
Up	ENSG00000031003	2.24395	0.0281	FAM13B	5q31.2	protein_coding	1.27472	1.09497	3.99283	3.81853	2.96971	2.9341
Up	ENSG00000174106	2.24318	0.0287	LEMD3	12q14.3	protein_coding	1.94493	1.48353	3.25663	4.47123	3.84273	4.25904
Up	ENSG00000172830	2.24294	0.0685	SSH3	11q13.2	protein_coding	2.75759	3.01856	6.11883	4.96762	4.0939	5.34372
Up	ENSG00000165169	2.24225	0.0329	DYNLT3	Xp11.4	protein_coding	2.03626	1.94835	3.45922	4.09953	4.52275	4.85675
Up	ENSG00000107175	2.24225	0.0442	CREB3 ENSG00000107175	9p13.3	protein_coding	3.48772	3.50571	5.36616	5.54522	5.28269	6.76179
Up	ENSG00000026297	2.24073	0.00794	RNASET2	6q27	protein_coding	2.39263	2.84042	4.56593	4.8234	5.00497	5.03473
Up	ENSG00000213853	2.23972	0.00806	EMP2	16p13.13	protein_coding	3.20362	3.35631	5.8178	5.44905	5.64294	5.16893
Up	ENSG00000157110	2.23915	0.0205	RBPMS	8p12	protein_coding	3.75806	3.55835	6.34696	6.00651	6.003	5.23295
Up	ENSG00000122432	2.23828	0.0571	SPATA1	1p22.3	protein_coding	0.825537	0.0488709	3.56967	2.80633	2.44017	1.88575
Up	ENSG00000143545	2.23729	0.0772	RAB13	1q21.3	protein_coding	4.58347	4.93512	7.70321	6.59577	7.74311	5.94425
Up	ENSG00000175197	2.23461	0.0685	DDIT3	12q13.3	protein_coding	4.50835	4.00809	5.70094	7.10979	5.87612	7.28447
Up	ENSG00000188215	2.23453	0.0512	DCUN1D3	16p12.3	protein_coding	0.881025	0.990017	2.38411	3.43852	4.06104	2.79654
Up	ENSG00000133858	2.23366	0.0298	ZFC3H1	12q21.1	protein_coding	2.58258	2.39588	4.70009	3.93099	5.04504	5.21543
Up	ENSG00000143367	2.23299	0.013	TUFT1	1q21.3	protein_coding	0.905617	0.870882	2.72111	2.88913	3.45598	3.41875
Up	ENSG00000164548	2.23298	0.0279	TRA2A	7p15.3	protein_coding	4.23395	3.80112	5.76715	5.83046	6.62065	6.78378
Up	ENSG00000171456	2.23275	0.0166	ASXL1	20q11.21	protein_coding	3.24658	3.72988	5.54071	5.33324	6.20374	5.80622
Up	ENSG00000100234	2.23149	0.0778	TIMP3	22q12.3	protein_coding	5.94876	5.39148	7.48372	8.82945	8.37725	6.91601
Up	ENSG00000198586	2.23051	0.0462	TLK1	2q31.1	protein_coding	1.64983	1.43833	3.89817	4.70171	3.386	3.11247
Up	ENSG00000071553	2.23036	0.0568	ATP6AP1	Xq28	protein_coding	4.66502	4.32651	7.27472	7.32768	5.70931	6.59277
Up	ENSG00000101361	2.22959	0.0375	NOP56	20p13	protein_coding	5.34529	4.97238	6.84133	6.96169	8.18671	7.56394
Up	ENSG00000146833	2.22946	0.0271	TRIM4	7q22.1	protein_coding	1.82835	1.7055	3.60284	4.38173	3.4604	4.5406
Up	ENSG00000108387	2.22929	0.0439	SEPTIN4	17q22	protein_coding	3.12509	2.09169	5.03315	4.32754	4.48423	5.5058
Up	ENSG00000136492	2.22918	0.0541	BRIP1 ENSG00000136492	17q23.2	protein_coding	0.667755	0.0446753	3.33763	2.96372	1.74104	2.29919
Up	ENSG00000153207	2.22804	0.0768	AHCTF1	1q44	protein_coding	1.78706	1.92378	2.80201	4.39212	4.82564	4.31407
Up	ENSG00000128245	2.22769	0.066	YWHAH	22q12.3	protein_coding	4.20326	4.61205	5.97634	5.9914	6.91625	7.65739
Up	ENSG00000057019	2.22654	0.0451	DCBLD2	3q12.1	protein_coding	1.52752	1.22751	4.11956	3.94838	3.74056	2.6077
Up	ENSG00000116478	2.22634	0.0483	HDAC1	1p35.2	protein_coding	3.54819	3.17593	5.66078	5.91764	4.58838	6.1868
Up	ENSG00000119523	2.22613	0.0289	ALG2	9q22.33	protein_coding	2.40189	2.25695	3.92373	4.86557	5.162	4.27089
Up	ENSG00000267102	2.22599	0.0109		17q12	transcribed_processed_pseudogene	0.50819	0	2.86155	2.45015	2.26006	2.34858
Up	ENSG00000152818	2.22568	0.0283	UTRN	6q24.2	protein_coding	1.39757	1.78721	3.43749	3.98421	3.34986	4.50069
Up	ENSG00000112697	2.22469	0.0281	TMEM30A	6q14.1	protein_coding	2.78611	2.88675	4.25938	5.16711	5.30346	5.51454
Up	ENSG00000163611	2.22461	0.0651	SPICE1	3q13.2	protein_coding	0.366092	0.622681	2.79337	3.62251	1.6421	2.818
Up	ENSG00000158195	2.22394	0.00864	WASF2	1p36.11	protein_coding	2.9391	2.96114	5.55537	5.14136	4.84274	5.15677
Up	ENSG00000073008	2.22368	0.0293	PVR	19q13.31	protein_coding	2.3052	3.05254	5.53472	5.01087	4.50242	4.56219
Up	ENSG00000157193	2.22335	0.0234	LRP8	1p32.3	protein_coding	0.0927095	0.645241	3.14998	2.51354	2.0482	2.65759
Up	ENSG00000147799	2.22214	0.0258	ARHGAP39	8q24.3	protein_coding	0.567225	0.29463	3.10738	2.61529	1.93759	2.95202
Up	ENSG00000178297	2.21958	0.0873	TMPRSS9	19p13.3	protein_coding	1.27013	0.373231	3.72454	1.86068	2.94959	3.63022
Up	ENSG00000243244	2.21832	0.0293	STON1	2p16.3	protein_coding	0.862913	0.671484	3.04623	3.51775	2.19831	3.1798
Up	ENSG00000101474	2.21766	0.0146	APMAP	20p11.21	protein_coding	3.17355	3.14225	5.52779	5.76154	4.83389	5.379
Up	ENSG00000168916	2.21703	0.0371	ZNF608	5q23.2	protein_coding	1.68943	1.62153	3.71246	4.24383	3.05745	4.47631
Up	ENSG00000127616	2.21686	0.0618	SMARCA4	19p13.2	protein_coding	3.9327	3.99261	6.78308	5.16965	5.91173	6.85362
Up	ENSG00000093217	2.21607	0.0444	XYLB	3p22.2	protein_coding	0.115336	0.207179	3.23995	2.60862	1.80493	1.85582
Up	ENSG00000131171	2.2153	0.0966	SH3BGRL	Xq21.1	protein_coding	3.28307	2.68882	4.27813	5.63551	6.31637	4.57498
Up	ENSG00000186314	2.21521	0.0527	PRELID2	5q32	protein_coding	0.420488	0.364119	1.79403	3.13248	2.17867	3.32487
Up	ENSG00000146232	2.21505	0.0817	NFKBIE	6p21.1	protein_coding	1.51622	0.880014	2.86447	3.03944	4.70695	3.04181
Up	ENSG00000119661	2.2143	0.0625	DNAL1	14q24.3	protein_coding	1.2396	0.764795	4.04425	3.71242	2.62846	2.48085
Up	ENSG00000163605	2.21402	0.00939	PPP4R2	3p13	protein_coding	2.30777	2.64497	4.97747	4.57293	4.37182	4.83936
Up	ENSG00000073921	2.214	0.00934	PICALM	11q14.2	protein_coding	4.42412	4.76468	6.66231	7.01875	7.04999	6.50256
Up	ENSG00000254979	2.21274	0.0879		11q12.1	protein_coding	0.897092	0.843444	2.99068	1.79696	3.74838	3.79601
Up	ENSG00000111671	2.21266	0.0668	SPSB2	12p13.31	protein_coding	2.73705	2.35469	4.98302	4.9629	3.59732	5.49089
Up	ENSG00000118620	2.21079	0.015	ZNF430	19p12	protein_coding	0.598126	0.25044	2.91895	2.96626	2.19341	2.46167
Up	ENSG00000169991	2.21032	0.0183	IFFO2 ENSG00000169991	1p36.13	protein_coding	1.06813	1.2267	3.58033	2.72313	3.41562	3.71186
Up	ENSG00000139438	2.21007	0.0851	FAM222A	12q24.11	protein_coding	0.817049	1.26571	2.69866	3.73345	2.31526	4.25841
Up	ENSG00000171388	2.20948	0.0311	APLN	Xq26.1	protein_coding	0.981271	0.516908	3.00444	2.42873	2.70293	3.69819
Up	ENSG00000162825	2.20906	0.00952	NBPF20	1q21.1	protein_coding	0.757465	0.422725	3.16395	2.69538	2.82022	2.51708
Up	ENSG00000167797	2.20893	0.0556	CDK2AP2	11q13.2	protein_coding	3.52996	3.30907	6.643	5.49013	4.83822	5.54244
Up	ENSG00000166822	2.20862	0.0354	TMEM170A	16q23.1	protein_coding	1.0437	0.840134	3.41726	3.73252	3.13484	2.31754
Up	ENSG00000146535	2.20857	0.0191	GNA12	7p22.2	protein_coding	2.46094	2.6826	4.73439	4.24985	4.80043	5.3367
Up	ENSG00000176390	2.20785	0.0588	CRLF3	17q11.2	protein_coding	1.83342	2.19074	5.26869	4.04468	3.44143	4.12493
Up	ENSG00000170889	2.20784	0.0257	RPS9	19q13.42	protein_coding	4.71878	5.32695	7.82549	7.3707	6.82089	6.90574
Up	ENSG00000186635	2.2076	0.045	ARAP1	11q13.4	protein_coding	4.77438	4.25717	7.54135	5.94501	6.67306	6.73406
Up	ENSG00000104976	2.20717	0.0292	SNAPC2	19p13.2	protein_coding	2.29263	2.60293	5.16641	4.09276	4.28221	5.07842
Up	ENSG00000216819	2.20708	0.0265	TUBB2BP1	6p25.2	unprocessed_pseudogene	0.176421	0	2.79603	1.582	2.23455	2.56858
Up	ENSG00000163001	2.20699	0.0249	CFAP36	2p16.1	protein_coding	3.5923	2.82601	5.58512	5.22933	4.95202	5.8981
Up	ENSG00000182827	2.20692	0.0258	ACBD3	1q42.12	protein_coding	2.60333	3.48728	4.8347	5.75824	5.13863	5.27731
Up	ENSG00000114346	2.20603	0.00322	ECT2	3q26.31	protein_coding	0.406709	0.344869	2.58151	2.73631	2.48607	2.52341
Up	ENSG00000175455	2.20537	0.061	CCDC14	3q21.1	protein_coding	3.22559	2.07886	4.61699	5.00863	4.1513	5.65345
Up	ENSG00000162769	2.205	0.0324	FLVCR1	1q32.3	protein_coding	0.301083	0.46949	3.1745	2.69132	1.77986	2.71544
Up	ENSG00000182771	2.20492	0.0238	GRID1	10q23.2	protein_coding	0.677719	0.412625	2.10661	3.23902	3.01574	2.63899
Up	ENSG00000110169	2.20254	0.0554	HPX	11p15.4	protein_coding	0.2502	0	3.26591	2.09671	1.48827	2.45967
Up	ENSG00000116001	2.20219	0.0603	TIA1	2p13.3	protein_coding	4.26358	2.79058	5.99836	6.18763	5.03885	5.69223
Up	ENSG00000167103	2.20214	0.0779	PIP5KL1	9q34.11	protein_coding	0.229491	0.800378	3.72523	1.98956	2.03998	3.11353
Up	ENSG00000133789	2.20179	0.0375	SWAP70	11p15.4	protein_coding	1.98861	2.02009	3.92785	4.91447	4.49881	3.48343
[truncated: 2,614 more rows]
