# Supplementary material for: Chondrosarcoma organoids reveal SHH pathway activation driven by PTCH1 and BCOR alterations
Source: Sci Rep. 2025 Dec 19;16:3239. doi: 10.1038/s41598-025-33061-z (PMC12830980; doi:10.1038/s41598-025-33061-z)
Supplement: Supplementary file 3 — Supplementary Material 3 [file 41598_2025_33061_MOESM3_ESM.xlsx]

## Sheet: Processed_Data
List of all gene expression levels analyzed by RNA sequencing and normalized as transcripts per million (TPM)
	User_ID sorted by SD	symbol	N_1029CS	N_1077CS_N	T_1029CS	ODX_1029CS	CS_1077T	ODX_1077CS
1	ENSG00000111245	MYL2	15.2165	14.4881	0	0	0.2576	0
2	ENSG00000198125	MB	13.647	14.06	0.3206	0	0	0.6583
3	ENSG00000143632	ACTA1	14.6799	15.5672	1.4878	0.8988	1.2028	4.1808
4	ENSG00000092054	MYH7	13.2276	13.0454	0.8239	0.1073	0	0
5	ENSG00000105048	TNNT1	15.4415	14.0315	1.67	0.7894	2.3557	4.9357
6	ENSG00000139219	COL2A1	0	0.2573	12.191	12.7054	10.38	14.4823
7	ENSG00000159173	TNNI1	12.917	12.9764	0.3709	0.2412	0.0999	0.9351
8	ENSG00000156885	COX6A2	12.3808	12.6557	0	0	0	0
9	ENSG00000104879	CKM	13.6196	14.8056	1.8845	0.86	1.753	2.722
10	ENSG00000060718	COL11A1	0	0.169	12.1228	13.6581	9.0544	12.2643
11	ENSG00000196091	MYBPC1	11.8349	12.3549	0	0.1505	0	0.7435
12	ENSG00000157766	ACAN	0.7171	0.0657	12.3018	12.6645	9.8697	11.4524
13	ENSG00000173991	TCAP	12.6308	12.7245	0.4448	2.1746	0.9391	2.2029
14	ENSG00000114854	TNNC1	14.1302	13.9611	3.9036	1.7609	1.2712	5.6943
15	ENSG00000175084	DES	12.5266	13.6927	1.8126	0.3408	2.3405	4.5069
16	ENSG00000112280	COL9A1	0.1335	0.0589	11.0702	12.4998	7.5157	11.8731
17	ENSG00000092758	COL9A3	1.7979	1.291	13.4188	13.7768	9.2183	12.2955
18	ENSG00000132031	MATN3	0.4489	0.1052	11.9771	13.6287	6.5929	9.0649
19	ENSG00000168530	MYL1	11.4242	12.6491	1.6554	0.705	0	2.3046
20	ENSG00000101470	TNNC2	11.6688	13.4824	2.7498	0.6724	1.9458	1.6394
21	ENSG00000049089	COL9A2	0.3951	0.6455	12.3145	12.8374	7.9935	10.6018
22	ENSG00000206290	COL11A2	0.7338	0	11.4249	12.3889	6.8993	10.8647
23	ENSG00000170891	CYTL1	0	0	9.6809	13.9564	6.1007	7.3161
24	ENSG00000239474	KLHL41	10.9152	11.1935	0.7278	0.5544	0	0.5669
25	ENSG00000170290	SLN	10.5778	11.5379	1.3219	0	0.7609	0
26	ENSG00000105664	COMP	1.2014	0.1805	12.1225	11.1282	11.4601	9.8452
27	ENSG00000145681	HAPLN1	0	0	8.8781	12.7071	8.1333	10.6877
28	ENSG00000180209	MYLPF	11.0022	12.1989	0	0.9726	1.1993	2.8946
29	ENSG00000127743	IL17B	0.7807	0	11.9137	11.8154	7.0745	10.2455
30	ENSG00000177791	MYOZ1	10.576	11.3632	0.9294	1.2413	0.4153	0.0543
31	ENSG00000131094	C1QL1 ENSG00000131094	0	0	10.643	11.8243	2.8878	1.6223
32	ENSG00000101210	EEF1A2	11.0338	11.1969	0.7205	0.0849	1.0895	1.6506
33	ENSG00000077522	ACTN2	10.8247	10.2706	0.5774	0.4828	0.7959	0.1146
34	ENSG00000137441	FGFBP2	0.3402	0.7534	10.2944	12.4139	6.7166	10.265
35	ENSG00000136110	CNMD	0	0.1081	10.6577	10.846	6.8783	10.1799
36	ENSG00000183091	NEB	11.7709	11.5435	1.6644	1.9692	1.7601	1.368
37	ENSG00000138207	RBP4	1.7082	0	10.407	12.4061	3.2213	2.0108
38	ENSG00000108821	COL1A1 ENSG00000108821	3.2322	3.3493	14.8072	11.9458	13.2797	11.3782
39	ENSG00000164879	CA3	13.0564	11.5775	1.8439	2.2385	2.2586	4.468
40	ENSG00000182600	SNORC	1.9945	1.5729	11.9053	12.3646	9.5943	11.6913
41	ENSG00000197893	NRAP	9.8205	9.9919	0	0.0818	0	0.5184
42	ENSG00000261857	MIA	0	0	9.6537	10.9071	7.7851	9.6015
43	ENSG00000122367	LDB3	10.4791	9.9668	1.0389	0.4767	0.6939	0.297
44	ENSG00000109061	MYH1	6.0355	11.8247	0	0	0	0
45	ENSG00000240045	STRIT1	10.0468	9.2746	0	0.3413	0.2474	0
46	ENSG00000137801	THBS1	0.5024	0.8761	9.5769	11.863	9.7443	8.6937
47	ENSG00000164362	TERT	0	0	9.936	8.9221	0	0
48	ENSG00000188536	HBA2	9.571	7.237	2.8623	0	11.931	1.266
49	ENSG00000125414	MYH2	8.0035	10.379	0	0	0.052	0.0123
50	ENSG00000230930	COL11A2	0.2385	0.8376	11.0015	11.4386	5.7634	6.4697
51	ENSG00000122176	FMOD	2.4309	1.2613	11.2848	12.5505	8.859	10.4473
52	ENSG00000227801	COL11A2	0.2928	0.1452	9.2926	10.409	0.8413	1.3624
53	ENSG00000182492	BGN	2.8517	2.8976	13.5475	12.4253	10.7911	10.6621
54	ENSG00000164708	PGAM2	9.2845	10.7508	5.0906	1.1257	0	0.2515
55	ENSG00000134291	TMEM106C	3.8824	3.8702	12.2077	14.697	4.6188	6.1295
56	ENSG00000162510	MATN1	0.2176	0.106	7.7152	11.3948	4.7791	9.122
57	ENSG00000163092	XIRP2	9.4187	8.745	0	0	0	0
58	ENSG00000166509	CLEC3A	0.1182	0.2915	8.5342	11.1698	2.7832	6.1185
59	ENSG00000181195	PENK	1.1046	0.8375	11.6583	10.2064	7.5835	6.5359
60	ENSG00000170807	LMOD2	8.6897	9.4053	0.6734	0.3354	0.3288	0
61	ENSG00000206172	HBA1	8.2444	5.8247	0.1483	0	10.4774	1.2543
62	ENSG00000168333	PPDPFL	6.982	10.357	0	0	0.9208	0.11
63	ENSG00000138100	TRIM54	9.4714	8.9336	0.5919	0.1804	0	1.645
64	ENSG00000143318	CASQ1 ENSG00000143318	9.4292	9.1983	0	0.1278	1.7582	1.418
65	ENSG00000029559	IBSP	0.3955	0	8.7913	4.4922	0.2218	9.5163
66	ENSG00000196218	RYR1	8.4865	9.0304	0.0275	0.0358	0.1636	0.9384
67	ENSG00000156076	WIF1	0	0.0644	7.3515	10.2004	0.1479	3.8175
68	ENSG00000129170	CSRP3	8.7061	8.274	0.1157	0.0889	0.1249	0
69	ENSG00000135447	PPP1R1A	8.691	8.7878	0	0.0481	0.4949	0.9314
70	ENSG00000136244	IL6	0.3813	1.3832	0	0.4392	10.9872	0
71	ENSG00000154553	PDLIM3	10.5305	11.1926	3.4221	0.6449	6.0034	2.6099
72	ENSG00000086967	MYBPC2	7.0638	10.1435	0	0	0	3.3794
73	ENSG00000091482	SMPX	9.0404	8.7478	0	0.4492	0.8853	0.8351
74	ENSG00000158022	TRIM63	6.3262	9.9897	0	0	0.4369	0.0463
75	ENSG00000232541	COL11A2	0.9715	0	0.0002	7.5749	6.6801	9.6414
76	ENSG00000243423		0	0	0	5.959	0	9.9604
77	ENSG00000169429	CXCL8	0.1538	0.8367	1.9748	0.3952	11.0633	0.0483
78	ENSG00000124701	APOBEC2	7.9743	8.9019	0	0.3301	0.1634	0.0768
79	ENSG00000272573	MUSTN1	9.8006	9.8378	2.5621	0.5211	1.7028	1.6124
80	ENSG00000130598	TNNI2	10.5524	12.2189	3.2622	2.8491	2.8481	3.7444
81	ENSG00000133878	DUSP26	8.076	8.7038	0	0	0	0.5855
82	ENSG00000212866	HSPA1B	0	5.4798	0	2.0806	9.0014	9.343
83	ENSG00000018625	ATP1A2	8.6566	9.0746	0.033	0.5249	0.1041	2.9212
84	ENSG00000214872	SMTNL1	8.0745	9.0797	0.4629	0.1623	0.9434	0
85	ENSG00000197249	SERPINA1	0.8355	0.2861	9.1126	9.8785	6.168	8.5248
86	ENSG00000118523	CCN2	2.9631	2.148	11.649	11.8899	9.176	8.7557
87	ENSG00000163126	ANKRD23	9.8992	10.0385	1.711	2.0202	1.2625	2.4793
88	ENSG00000116748	AMPD1	7.8482	8.428	0	0	0	0.1224
89	ENSG00000125740	FOSB	3.3804	0.3516	7.9519	10.8782	9.291	9.7273
90	ENSG00000244242	IFITM10	0.223	2.6911	10.8135	9.2459	3.7565	3.2482
91	ENSG00000168509	HJV	7.4987	8.4582	0	0	0	0.1454
92	ENSG00000149968	MMP3	0.1281	0.141	9.8508	7.8514	6.2721	2.6961
93	ENSG00000121005	CRISPLD1	0.7639	0.6547	8.0753	10.8411	3.9698	6.642
94	ENSG00000165887	ANKRD2	9.9573	7.4255	1.3473	0.7432	1.0603	0.5644
95	ENSG00000119147	ECRG4	2.7924	3.1566	11.7932	12.3864	7.1172	6.7985
96	ENSG00000100628	ASB2	7.2373	8.8014	0	0	0.332	0.3065
97	ENSG00000173641	HSPB7	9.2147	9.5265	2.7999	0.7388	1.5295	1.297
98	ENSG00000273673		9.8384	8.9879	9.1311	10.8123	10.3518	0
99	ENSG00000125730	C3	6.1654	5.6787	0.9998	1.5168	12.187	6.3209
100	ENSG00000163157	TMOD4	8.6703	9.4926	2.0312	1.2617	0.4626	1.5293
101	ENSG00000225691	HLA-C	0	6.5927	0	0	9.0366	0.6211
102	ENSG00000129824	RPS4Y1	0	7.4823	0	0	8.2004	0.2314
103	ENSG00000112559	MDFI	0.4356	0.3988	9.4729	8.344	5.6256	7.8476
104	ENSG00000164692	COL1A2	4.4266	4.767	13.315	11.4734	12.8016	11.3533
105	ENSG00000079393	DUSP13	7.306	8.2386	0	0	0	0.1532
106	ENSG00000154143	PANX3	0.081	0	6.5546	8.2416	0.204	7.1635
107	ENSG00000120729	MYOT	9.4197	9.0747	0.9673	1.8823	1.2277	2.2103
108	ENSG00000068976	PYGM	10.2388	11.4164	1.7889	3.824	3.2332	4.7185
109	ENSG00000134020	PEBP4	7.5901	8.7617	0.8248	0.8278	0.5899	0
110	ENSG00000172399	MYOZ2	7.8691	7.4811	0.058	0	0	0
111	ENSG00000171033	PKIA	7.8111	8.0895	0	0.0547	0.8449	0.3608
112	ENSG00000224963	ECMXP	0	0	9.2172	6.8327	5.1647	7.6639
113	ENSG00000160161	CILP2	0.0298	0.065	8.1829	8.1575	6.6247	7.5076
114	ENSG00000168542	COL3A1	3.5424	4.2366	11.9277	10.212	13.0296	8.5156
115	ENSG00000111799	COL12A1	2.0345	1.6276	10.0644	9.4248	8.7357	9.4743
116	ENSG00000186439	TRDN	7.5911	7.8348	0	0	0	0.3232
117	ENSG00000123500	COL10A1	0.0761	0	8.5056	5.015	4.4646	9.0532
118	ENSG00000029534	ANK1	8.3207	8.1087	0.1475	0.2519	0.9293	1.5415
119	ENSG00000164176	EDIL3 ENSG00000164176	0.4326	0.3593	7.4534	9.7832	5.4858	7.1579
120	ENSG00000235817		0	0.6216	0	5.6407	0	9.0251
121	ENSG00000185482	STAC3	10.3896	10.6243	3.4473	2.4448	2.2837	4.6604
122	ENSG00000111046	MYF6	7.1045	7.9014	0	0	0.2355	0
123	ENSG00000160808	MYL3	11.3727	11.627	5.1104	4.2375	2.7819	4.6702
124	ENSG00000235030	IER3	2.7211	1.963	7.4788	4.2604	10.6064	0.2311
125	ENSG00000010282	HHATL ENSG00000010282	8.2084	8.0153	0	0	1.0173	2.9709
126	ENSG00000111199	TRPV4	0.0523	0	7.6758	7.3731	5.4066	8.317
127	ENSG00000068078	FGFR3	1.1092	0.5744	7.9786	9.0644	3.1255	8.0403
128	ENSG00000135919	SERPINE2	1.261	2.5374	9.7727	10.5969	7.973	6.3404
129	ENSG00000124159	MATN4	0	0.3672	6.9212	6.5918	5.7389	9.423
130	ENSG00000139329	LUM	4.0215	2.714	9.8686	10.8928	12.1173	7.9746
131	ENSG00000149257	SERPINH1	3.3853	2.7878	10.5758	11.2061	8.9689	10.4931
132	ENSG00000101605	MYOM1	8.4789	8.7803	0.9938	1.8114	1.748	0.8209
133	ENSG00000140986	RPL3L ENSG00000140986	8.3146	8.6012	1.8678	0.8744	0.5851	1.4039
134	ENSG00000185739	SRL	7.3618	7.7789	0.0683	0.1971	0.8124	0.045
135	ENSG00000229194	HLA-V	0	0	1.3035	6.5092	0.986	8.8227
136	ENSG00000206505	HLA-A	0.0673	6.6671	0	0.216	8.6352	3.8269
137	ENSG00000132561	MATN2	1.408	1.6781	9.4774	9.0892	6.6369	9.0663
138	ENSG00000160307	S100B	1.4325	0.3614	8.1044	9.9226	5.0376	6.7641
139	ENSG00000198523	PLN	7.5656	7.2541	0	0.0614	0.5155	0.0795
140	ENSG00000134013	LOXL2	0.9984	1.4201	9.0959	9.2749	6.7306	7.8525
141	ENSG00000167642	SPINT2	0.1134	0.7074	7.0817	8.6111	5.7072	8.1695
142	ENSG00000235449		0	0	6.3778	1.8041	0	8.5262
143	ENSG00000232804	HSPA1B	8.7898	0	5.2341	8.7886	2.1439	1.8935
144	ENSG00000083782	EPYC	0	0	5.8782	8.6609	5.8489	7.2544
145	ENSG00000115414	FN1	4.2952	4.6438	12.8156	9.8733	12.2332	10.4383
146	ENSG00000198576	ARC	0.0853	0.1389	0.4773	1.3712	9.6865	1.4894
147	ENSG00000175592	FOSL1	0	0.3276	7.4092	6.3114	8.4012	6.343
148	ENSG00000101306	MYLK2	7.1156	9.5302	1.6114	0.5494	2.0495	1.5124
149	ENSG00000188257	PLA2G2A	2.3433	3.3746	5.1669	2.1092	11.3137	1.4726
150	ENSG00000178821	TMEM52	7.4452	7.9118	0	0	0.713	2.4238
151	ENSG00000115593	SMYD1	7.0634	7.1809	0	0	0	0.0507
152	ENSG00000234794	HLA-DRA	0	5.0601	0	0	8.5152	0
153	ENSG00000164309	CMYA5	9.622	10.5711	2.6406	2.7485	3.1119	3.6999
154	ENSG00000113140	SPARC	6.298	7.2951	13.9828	14.5858	13.5002	13.2044
155	ENSG00000244734	HBB	8.6419	7.053	0	8.9426	10.4246	6.8729
156	ENSG00000197744	PTMAP2	0	0	0	5.4199	1.9526	8.7827
157	ENSG00000184544	DHRS7C	6.307	7.726	0	0	0	0
158	ENSG00000271159	HINT1P2	0	0	0	4.9677	0	8.4678
159	ENSG00000125398	SOX9	1.159	0.7815	8.7698	8.3544	6.2626	7.8487
160	ENSG00000155657	TTN	7.5568	7.9762	1.6885	1.1403	0.4883	0.0195
161	ENSG00000131730	CKMT2	8.2809	8.5369	1.0021	1.2893	0.8061	4.5452
162	ENSG00000108878	CACNG1	7.1645	6.914	0	0.1054	0	0
163	ENSG00000148377	IDI2	7.2037	7.788	0.1218	1.1226	0.6748	0.1864
164	ENSG00000230204	FTH1P5	0.3418	0	0.4397	5.8585	0	8.2307
165	ENSG00000154358	OBSCN	9.2179	8.8454	2.1147	3.0314	1.8587	1.4371
166	ENSG00000284613		0	0	6.1291	1.6291	6.0829	8.3834
167	ENSG00000107984	DKK1	0.4437	0.3047	3.6821	9.5135	4.5139	0.5044
168	ENSG00000224398	CSNK2B	5.9299	0	6.9851	6.7236	0	0
169	ENSG00000041982	TNC	0.7671	0.4013	8.615	7.8002	7.1825	4.9834
170	ENSG00000115318	LOXL3	1.1727	0.7083	8.7161	8.3807	5.5506	7.5465
171	ENSG00000136457	CHAD	2.3341	2.1127	9.4212	10.7876	5.0481	6.3887
172	ENSG00000182676	PPP1R27	9.0382	8.647	0.5756	3.1115	2.3239	2.418
173	ENSG00000108691	CCL2	3.0806	3.1848	2.0295	2.0281	10.5767	0.4492
174	ENSG00000138795	LEF1	0.0928	0.1959	7.694	8.1627	4.4895	5.9994
175	ENSG00000163993	S100P	0	0.3364	7.8183	4.566	4.2929	8.3892
176	ENSG00000167676	PLIN4	6.9303	7.7557	0.2486	0.1522	0.6094	0.9564
177	ENSG00000229230	MT1P3	0	0	0	0	0	8.7139
178	ENSG00000054938	CHRDL2	0.9473	3.3465	9.5134	8.8356	2.0263	4.6998
179	ENSG00000164106	SCRG1	0.1189	0.0312	6.703	8.77	4.2444	5.5488
180	ENSG00000186340	THBS2	0.7193	1.0992	8.755	7.0129	7.1761	7.7491
181	ENSG00000274137	MYOM2	9.1427	7.1277	3.118	3.3842	0.9079	0
182	ENSG00000157119	KLHL40 ENSG00000157119	6.3892	7.4008	0	0	0.1304	0.0919
183	ENSG00000111341	MGP	5.8024	5.8494	11.5876	14.767	11.5177	9.1386
184	ENSG00000105509	HAS1	0	0.0695	1.5976	1.2214	9.4136	3.032
185	ENSG00000128342	LIF	0.1224	0	4.4402	6.0934	8.826	1.7558
186	ENSG00000123689	G0S2	9.3399	3.0927	2.0831	1.182	6.6359	0.1102
187	ENSG00000112183	RBM24	7.3589	7.1083	0	0.1458	1.0189	0.5427
188	ENSG00000284746		0	0	4.526	5.0851	6.826	8.5471
189	ENSG00000196136	SERPINA3	0.5775	3.832	9.3437	9.6667	7.6173	5.2676
190	ENSG00000188783	PRELP	1.8181	2.5579	9.1532	10.3994	6.8568	7.9024
191	ENSG00000188176	SMTNL2	6.0215	8.0782	0.3674	0	1.5196	0
192	ENSG00000235657	HLA-A	1.3398	6.2812	0.0157	1.9128	8.3614	0
193	ENSG00000164932	CTHRC1	1.8834	0.9191	8.1281	8.7448	8.1403	7.4274
194	ENSG00000108515	ENO3	10.9786	12.9637	4.9608	4.6876	5.3113	6.9618
195	ENSG00000177354	C10orf71	6.5681	7.1015	0.1324	0.0642	0.0307	0.0311
196	ENSG00000118785	SPP1	0.1191	0.1311	7.9708	7.166	6.4215	4.095
197	ENSG00000109625	CPZ	0	0.2791	6.9814	7.6803	7.0234	3.6746
198	ENSG00000232126	HLA-B	4.7639	6.0051	0.3839	1.7991	8.8332	0
199	ENSG00000122861	PLAU	2.5814	2.1434	6.2532	2.1814	9.6756	0.1322
200	ENSG00000271134	IFITM3P9	0	0	0	5.5867	0	7.647
201	ENSG00000225630	MTND2P28	3.9806	9.9489	2.7171	2.2345	9.2151	8.3395
202	ENSG00000102802	MEDAG	1.2105	1.3917	0.3477	0.8848	9.2946	4.7371
203	ENSG00000102265	TIMP1	3.6554	3.3077	10.2975	9.2239	11.5232	6.8797
204	ENSG00000172403	SYNPO2	7.571	8.0855	0.7035	1.2463	2.5759	0.6441
205	ENSG00000204592	HLA-E	0	5.6145	0	0	7.6087	0.233
206	ENSG00000113083	LOX	0.3078	0.55	8.0417	6.7544	7.0202	6.0993
207	ENSG00000141756	FKBP10	2.8428	2.1706	9.8247	9.3845	8.0753	8.9328
208	ENSG00000258947	TUBB3	0.0757	0.0843	7.2026	5.1446	7.0474	6.8939
209	ENSG00000081248	CACNA1S	6.6288	6.6962	0	0	0.0266	0.0248
210	ENSG00000106483	SFRP4	1.6346	1.9725	4.4193	1.4382	10.5036	3.5735
211	ENSG00000073756	PTGS2	0.0547	0	4.6992	5.5633	8.248	1.0156
212	ENSG00000113739	STC2 ENSG00000113739	0.5856	1.2117	7.8171	8.6266	4.1426	6.587
213	ENSG00000171812	COL8A2	0.1857	0.0613	6.9607	7.7776	5.0545	6.1147
214	ENSG00000140839	CLEC18B	0.4029	0.1647	6.9955	5.7524	5.2798	8.1984
215	ENSG00000248746	ACTN3	1.6225	8.7145	0	0.2476	0.355	0.3947
216	ENSG00000163995	ABLIM2	6.0877	7.7563	0.2283	0	2.2109	0.0967
217	ENSG00000077274	CAPN6	0.557	0.6309	6.5375	7.8202	4.1181	7.9148
218	ENSG00000100985	MMP9	0	0.177	8.0712	1.4005	5.5543	0.4408
219	ENSG00000117115	PADI2	6.9606	6.9407	0.1866	0.1395	1.0222	0.3449
220	ENSG00000143320	CRABP2	1.4119	0.8837	7.0992	5.0248	8.5224	8.3018
221	ENSG00000152952	PLOD2	1.2415	1.0781	6.7602	9.102	7.1891	6.9879
222	ENSG00000072954	TMEM38A	7.1086	8.1815	1.431	1.2925	0.1235	2.1551
223	ENSG00000157322	CLEC18A	0.2373	0	7.9337	6.6612	3.5308	6.0646
224	ENSG00000236191	RPS15AP25	0	0	0	3.7462	0	8.1713
225	ENSG00000278275		0	0	5.902	5.7474	6.4777	7.5468
226	ENSG00000177106	EPS8L2	1.6141	0.9551	9.2357	7.5708	5.5626	7.2379
227	ENSG00000160801	PTH1R	2.6959	2.5759	9.6488	7.0167	6.2829	10.5964
228	ENSG00000173868	PHOSPHO1	0.7422	0.2431	5.4384	3.1525	2.3481	9.2783
229	ENSG00000138347	MYPN	6.2869	6.8022	0	0.0249	0	0.0896
230	ENSG00000130635	COL5A1	2.8118	2.1908	10.3721	7.1828	9.5028	6.3454
231	ENSG00000128591	FLNC	8.4277	9.1587	2.7092	0.7011	6.8834	4.0537
232	ENSG00000184033	CTAG1B	0	0	6.4983	6.5076	0	0.0002
233	ENSG00000139914	FITM1	7.6059	7.4952	1.0661	0.3162	1.6683	1.386
234	ENSG00000198373	WWP2	3.6383	3.7158	11.5709	9.6761	7.7073	9.9448
235	ENSG00000188716	DUSP29	6.4596	6.5258	0	0	0	0
236	ENSG00000164440	TXLNB	6.3382	7.1108	0.3761	0.0937	0.1923	0.3865
237	ENSG00000214456	PLIN5	7.6305	7.7587	1.6468	0.6432	2.0748	0.8122
238	ENSG00000130528	HRC	7.4478	7.6086	0.2817	0.3274	1.7513	3.3487
239	ENSG00000233929	MT1XP1	0	0	0	2.9603	2.423	8.5937
240	ENSG00000227582	ADGRF5P1	0	0	3.9625	8.0304	0	0.1202
241	ENSG00000133454	MYO18B	6.5947	6.586	0	0	0	0.6018
242	ENSG00000163734	CXCL3	0.3801	0.5952	0	0	8.3375	0
243	ENSG00000196296	ATP2A1	8.1177	11.9085	4.8358	2.4379	4.414	6.1371
244	ENSG00000203812	H2AC18 ENSG00000203812	0.0009	4.7335	0	6.2834	6.802	0
245	ENSG00000165949	IFI27	6.3625	6.6377	0.8769	1.9094	9.4255	2.7054
246	ENSG00000137285	TUBB2B	0.8842	1.726	8.0629	8.2905	6.555	7.5419
247	ENSG00000239527	RPS23P7	0	0.5224	0	4.2097	0	8.0144
248	ENSG00000143127	ITGA10	0.9324	1.1109	7.677	7.6507	4.9685	8.0483
249	ENSG00000120738	EGR1	6.102	1.7891	8.847	11.1314	9.3532	8.7427
250	ENSG00000163975	MELTF	1.9333	1.2978	8.3541	7.9446	5.3728	8.6305
251	ENSG00000284099	SQSTM1	0	6.452	5.6294	0	0	5.9006
252	ENSG00000197766	CFD	7.9162	7.4648	3.6611	2.5299	8.838	0.8557
253	ENSG00000233697	HLA-DRB8	0	0	0	5.5938	0	7.0034
254	ENSG00000122477	LRRC39	7.4059	6.9426	0.8729	0.8395	0.8094	0.7767
255	ENSG00000142871	CCN1	4.9069	2.6586	10.3123	11.0684	8.8144	8.7914
256	ENSG00000183311	TUBB	4.3648	0	7.8781	7.3541	0.9486	2.521
257	ENSG00000181856	SLC2A4	6.6412	6.5735	0.0497	0.2591	0.452	0.3047
258	ENSG00000132429	POPDC3	5.9769	6.8824	0	0.3325	0	0.1723
259	ENSG00000164694	FNDC1	0.6897	0.9369	7.9678	5.2369	7.5334	2.2249
260	ENSG00000106484	MEST	1.0005	1.3464	6.4268	8.4834	6.1108	7.9554
261	ENSG00000163220	S100A9	3.3501	3.1284	3.6004	0	8.8763	0
262	ENSG00000157734	SNX22	0.3605	0.2435	7.7838	5.9929	0.8471	4.5147
263	ENSG00000251493	FOXD1	0	0.0633	6.4124	6.5188	1.9901	6.4863
264	ENSG00000004799	PDK4	8.3205	8.8222	1.6085	2.473	4.6599	1.839
265	ENSG00000185499	MUC1	0.3169	0.1583	7.5297	5.6998	6.4247	5.8378
266	ENSG00000235708	COL11A2	0.8116	0.6512	4.5178	7.9396	0	0.0066
267	ENSG00000106366	SERPINE1 ENSG00000106366	0.6419	2.365	8.2072	5.7514	8.7398	3.7921
268	ENSG00000144152	FBLN7	0.5511	0.6342	7.3664	7.7823	2.136	3.1122
269	ENSG00000170345	FOS	7.587	2.6966	9.3619	11.6233	8.7147	11.1242
270	ENSG00000226718	SNRPGP8	0	0	0	3.3292	0	7.8543
271	ENSG00000036448	MYOM2	7.6034	7.2966	2.7343	0.8567	0.9091	0.996
272	ENSG00000163739	CXCL1	1.0279	1.6579	0	2.1777	8.3306	5.8533
273	ENSG00000100399	CHADL	1.1799	0.7646	8.2866	7.3995	4.1086	6.4735
274	ENSG00000167476	JSRP1	8.4649	8.9337	3.3586	2.0312	1.5829	3.8258
275	ENSG00000154096	THY1	1.8258	1.7813	8.5668	5.4052	8.9569	7.1781
276	ENSG00000082196	C1QTNF3	1.9268	1.8476	7.6183	9.0602	8.1579	6.9812
277	ENSG00000149090	PAMR1	1.0136	1.4298	6.8708	9.396	4.2646	4.2472
278	ENSG00000160360	GPSM1	1.6259	0.7013	7.8946	7.0011	5.867	7.8861
279	ENSG00000217644		1.7118	0	0	4.324	0	7.8309
280	ENSG00000100196	KDELR3	0.8281	0.609	5.7292	7.4973	6.2939	7.4673
281	ENSG00000157335	CLEC18C	0	0.1034	6.2297	4.7015	4.6717	7.6825
282	ENSG00000235655	H3P6	0	1.3083	5.619	7.0598	0	0
283	ENSG00000137198	GMPR	7.1674	7.7859	0.8234	1.8178	2.2362	0.8308
284	ENSG00000090530	P3H2	0.7646	0.3735	7.0306	7.8902	5.2432	5.5215
285	ENSG00000267203	SNRPGP4	0	0	5.4512	6.7448	0	0
286	ENSG00000262855		6.8245	5.3373	0	0	0	0
287	ENSG00000152137	HSPB8	7.4231	7.5804	1.3063	0.5262	6.8126	3.5491
288	ENSG00000106333	PCOLCE	4.3878	3.4217	10.5533	9.0368	9.8686	10.2425
289	ENSG00000168334	XIRP1	6.3475	6.7575	0.3178	0.3688	4.6471	0.178
290	ENSG00000106624	AEBP1	2.744	3.265	10.2995	8.2643	9.3493	7.297
291	ENSG00000163380	LMOD3	5.8355	7.6342	0.9492	0.1679	0.5349	1.3995
292	ENSG00000118729	CASQ2	6.5263	6.2954	0.2614	0	0.3396	0.6393
293	ENSG00000234975	FTH1P2	0	0	0	5.4741	0	6.6673
294	ENSG00000227715	HLA-A	6.7084	3.1025	7.9646	7.773	6.6158	0
295	ENSG00000134602	STK26	0.5018	0.5661	5.7801	8.5474	2.7995	4.7781
296	ENSG00000229215	HLA-A	3.7267	0.0294	6.0312	6.6857	0	0
297	ENSG00000163395	IGFN1	4.4531	8.3861	0.6156	0.0323	2.0861	1.1484
298	ENSG00000131435	PDLIM4	1.7696	1.969	8.3694	5.077	8.8289	7.3758
299	ENSG00000242675	RPS16P9	0	0	0	0	0	7.681
300	ENSG00000145423	SFRP2	0.4999	1.1837	5.126	2.2644	8.8925	4.9619
301	ENSG00000090339	ICAM1	1.4469	3.7837	4.8851	6.7799	9.3776	1.3198
302	ENSG00000167244	IGF2	5.3493	4.2418	11.7908	8.8191	9.5243	11.4707
303	ENSG00000128714	HOXD13	0.0583	0	6.187	6.2178	0	0.6546
304	ENSG00000206013	IFITM5	0	0	3.4	1.3003	1.3634	8.2194
305	ENSG00000169271	HSPB3	5.7071	6.6274	0	0	0	0.7128
306	ENSG00000285037		0	2.7691	5.1456	2.8628	5.6682	9.1095
307	ENSG00000182253	SYNM	7.5459	8.0992	1.8246	1.3443	1.5094	2.9133
308	ENSG00000206503	HLA-A	3.7805	0.1419	6.272	6.6383	0.4073	0
309	ENSG00000253276	CCDC71L	0.7995	1.8171	1.9218	2.022	9.1503	1.5201
310	ENSG00000112541	PDE10A	0.8094	0.0802	6.8513	7.216	2.148	1.705
311	ENSG00000161249	DMKN	0.5984	0	7.6763	5.9207	4.3554	5.7978
312	ENSG00000238008	COX6CP10	0	0	0	2.2117	0	7.7191
313	ENSG00000105472	CLEC11A	2.1541	2.0848	8.8334	6.0431	5.9184	9.2119
314	ENSG00000147257	GPC3	0.6585	1.0194	1.0169	1.5876	3.4418	8.7243
315	ENSG00000099194	SCD	0.4719	0.1924	5.9415	5.2523	4.899	7.846
316	ENSG00000161896	IP6K3	5.4901	6.832	0	0.3512	0.4587	0.1445
317	ENSG00000173372	C1QA	3.1398	3.0914	3.5406	0	8.738	0.6454
318	ENSG00000227877	MRLN	5.8042	7.9184	1.2168	0.8532	1.7343	0.5318
319	ENSG00000276681	LENG8	6.0725	0.0944	8.6589	6.9237	3.9293	2.9261
320	ENSG00000166317	SYNPO2L	6.4766	6.3265	1.3266	0.2776	0.2559	0.1323
321	ENSG00000103489	XYLT1	0.1522	0.35	6.3295	7.2342	4.7366	5.693
322	ENSG00000124107	SLPI	2.7993	5.0829	1.1349	1.7355	6.1576	9.2488
323	ENSG00000250644		1.4074	3.9846	9.7313	7.8212	3.9928	3.5686
324	ENSG00000142227	EMP3	3.4945	2.964	9.0763	8.1017	9.2178	9.8867
325	ENSG00000106976	DNM1	1.8046	1.3593	9.3034	5.6788	6.882	6.2414
326	ENSG00000162998	FRZB	2.0868	1.4588	5.0807	10.1058	4.1127	4.8675
327	ENSG00000156219	ART3	6.6785	7.8779	2.6449	4.4522	0.3142	0.9436
328	ENSG00000160097	FNDC5	6.5915	8.3257	2.6681	0.6218	4.6881	1.2025
329	ENSG00000130957	FBP2	6.0695	7.74	1.8829	2.6767	0	0.8064
330	ENSG00000173369	C1QB	2.3865	2.8279	2.4526	0.1344	8.4236	0
331	ENSG00000110811	P3H3	1.8895	1.2333	8.0533	7.4555	6.5819	7.4772
332	ENSG00000136842	TMOD1	5.763	6.6711	0	0.1856	0.9895	0.3165
333	ENSG00000102683	SGCG	5.9969	6.5503	0	0	3.3891	0.3246
334	ENSG00000167617	CDC42EP5	0.0102	0.0176	7.7341	5.4691	3.6593	3.9738
335	ENSG00000095713	CRTAC1	0	0.4383	2.0603	0.2984	4.2451	7.7646
336	ENSG00000176890	TYMS	1.0634	0.3455	6.9044	6.1839	4.813	7.4184
337	ENSG00000184557	SOCS3	2.7349	3.3164	7.3333	10.0626	8.9261	8.2636
338	ENSG00000228299	HLA-C	5.8862	0	5.8177	5.064	0.2036	0
339	ENSG00000160200	CBS ENSG00000160200	0.8279	0.6572	6.2662	5.7863	4.9319	8.0964
340	ENSG00000162493	PDPN	2.3921	3.8252	7.8985	10.6363	7.6936	7.8483
341	ENSG00000117394	SLC2A1	0.7876	0.8838	6.609	6.3539	7.0845	6.713
342	ENSG00000266524	GDF10	0.4562	0.3181	6.9328	6.4804	0.9795	2.1447
343	ENSG00000149596	JPH2	6.1788	7.0016	0.9319	0.0238	0.6471	1.8317
344	ENSG00000088882	CPXM1	0.0543	0	2.768	0.2786	7.6558	3.9156
345	ENSG00000011422	PLAUR	0.9426	1.7973	5.5487	3.9584	9.1503	6.1851
346	ENSG00000153898	MCOLN2	0.3043	0	6.3417	5.9751	2.6677	6.4131
347	ENSG00000101194	SLC17A9	0.4031	1.1983	7.0568	5.5315	5.3178	7.6315
348	ENSG00000203618	GP1BB	1.4315	0.9476	8.5671	5.2767	4.2013	7.0488
349	ENSG00000143028	SYPL2	6.1737	6.2182	0	0.124	1.5383	0.1225
350	ENSG00000224080	UBE2FP1	0	0.5162	0	3.2639	7.5978	4.1347
351	ENSG00000196739	COL27A1	3.3073	2.5867	9.42	9.9098	5.9858	6.3531
352	ENSG00000091513	TF	0.7266	0.9305	4.8494	6.0214	6.4961	7.9759
353	ENSG00000137267	TUBB2A	3.2682	2.7587	9.6239	8.4488	8.7136	8.3239
354	ENSG00000142552	RCN3	3.457	2.8837	10.0699	8.8593	8.2589	8.1972
355	ENSG00000105880	DLX5	0.6025	0	6.5894	5.8161	2.0982	6.3064
356	ENSG00000151729	SLC25A4	8.6861	9.2391	2.2955	3.3627	2.939	5.1543
357	ENSG00000147408	CSGALNACT1	1.5732	0.9719	6.084	8.5989	4.1231	6.7471
358	ENSG00000183160	TMEM119	0.8147	1.0529	8.1238	4.436	6.4497	6.1961
359	ENSG00000110092	CCND1 ENSG00000110092	1.4645	1.0684	7.4976	7.1144	6.635	7.0016
360	ENSG00000254112		0	0	0	4.3149	0	6.8969
361	ENSG00000075618	FSCN1	2.3447	1.9402	8.1935	6.5123	6.5509	9.2004
362	ENSG00000019549	SNAI2	1.5176	0.3305	6.6483	6.4769	6.6121	7.0222
363	ENSG00000116661	FBXO2	0.6431	0.5441	7.353	6.5283	3.2836	5.9587
364	ENSG00000100739	BDKRB1	0	0.1473	0.7619	0.1279	7.7038	0.9902
365	ENSG00000175318	GRAMD2A	0	0	6.8537	5.8456	1.7793	4.7143
366	ENSG00000178882	RFLNA	2.1426	2.2618	7.8293	7.5071	5.2764	9.2406
367	ENSG00000109705	NKX3-2	0.0457	0	5.9882	6.0458	0.2752	4.3454
368	ENSG00000254719		0	0	5.051	0	0	6.3921
369	ENSG00000181458	TMEM45A	0.4342	0.2187	5.7692	6.5131	5.4533	6.4424
370	ENSG00000184489	PTP4A3	7.3114	6.8382	0.6324	0.672	2.0911	4.2434
371	ENSG00000244486	SCARF2	1.4236	1.2785	7.9899	6.9614	5.6997	7.1017
372	ENSG00000175564	UCP3	6.1888	8.5744	1.0684	2.4687	1.2726	3.4083
373	ENSG00000187486	KCNJ11	5.3168	6.2791	0.1144	0.0433	0	0.1091
374	ENSG00000136026	CKAP4	2.6271	3.2197	8.5557	8.9046	7.1456	9.3618
375	ENSG00000084636	COL16A1	3.5388	5.0956	10.5248	10.5316	9.4581	8.9947
376	ENSG00000092529	CAPN3	8.5758	8.8379	3.4586	1.9972	3.0534	3.8094
377	ENSG00000138080	EMILIN1	2.5634	2.5854	8.8527	9.0234	6.858	7.7483
378	ENSG00000101825	MXRA5	0.176	0.2755	6.2627	5.6186	6.7193	2.9873
379	ENSG00000235673		0	0	0	3.0673	0	7.2273
380	ENSG00000167123	CERCAM	2.3852	2.4424	9.3494	7.7761	7.5521	4.5883
381	ENSG00000204262	COL5A2	1.8867	1.9439	8.2438	6.5874	8.4378	6.4365
382	ENSG00000185100	ADSS1	8.5337	9.3451	2.6103	2.671	4.2315	4.0605
383	ENSG00000115325	DOK1 ENSG00000115325	1.6758	0.91	8.2233	7.0765	4.1332	5.9998
384	ENSG00000058404	CAMK2B	6.4478	6.1274	1.4489	0.1721	0.3793	0.5516
385	ENSG00000143365	RORC	5.371	6.3632	0.0694	0.1203	0.5559	0.0435
386	ENSG00000163710	PCOLCE2	2.1366	1.8983	8.2712	8.2805	6.3307	7.3445
387	ENSG00000275031	METRNL	2.1198	0.6567	6.0688	7.0144	7.6155	7.0888
388	ENSG00000164530	PI16	4.317	3.2768	0	0.83	8.3392	3.3556
389	ENSG00000153976	HS3ST3A1	0.1685	0.085	5.9228	6.9098	2.6751	5.062
390	ENSG00000170681	CAVIN4	6.1804	5.9351	0.5741	0.4016	0.4554	0.0623
391	ENSG00000076604	TRAF4	1.2526	1.3984	7.663	7.3191	6.2286	6.4873
392	ENSG00000077009	NMRK2	7.2268	5.1542	0	1.0996	0.7675	0.9034
393	ENSG00000168140	VASN	1.5506	1.1663	7.2568	6.5212	7.3637	6.9103
394	ENSG00000124216	SNAI1	0.4843	0.5888	6.5129	5.85	5.9502	6.476
395	ENSG00000140937	CDH11	0.8867	0.7689	5.974	6.9093	6.6512	6.3774
396	ENSG00000197903	H2BC12	2.1329	1.8015	7.2717	9.0597	5.6884	6.973
397	ENSG00000133110	POSTN	1.3224	1.7365	7.459	5.2111	8.5557	4.5215
398	ENSG00000143512	HHIPL2	0	0	6.8938	5.3518	1.1122	3.8278
399	ENSG00000227048		5.9395	5.3738	0	0	0	0
400	ENSG00000213486		0	0	0	2.7706	0	7.1799
401	ENSG00000130035	GALNT8	0.6161	0.1036	5.0614	6.3212	4.3555	7.0693
402	ENSG00000124813	RUNX2	0.361	0.201	5.5219	6.9804	3.5749	5.9798
403	ENSG00000268869	ESPNP	0	0	5.2197	4.4339	1.5969	6.9581
404	ENSG00000159189	C1QC	2.8303	3.0973	4.7793	0.1273	7.712	0
405	ENSG00000139289	PHLDA1	0.4979	0.8458	5.7076	7.2121	6.4688	5.3142
406	ENSG00000132000	PODNL1	0.6754	0.7772	8.0617	5.7759	5.0286	3.3747
407	ENSG00000166825	ANPEP	0.9806	0.5892	7.369	3.0564	7.0839	3.5695
408	ENSG00000248448	COX5BP1	0	0	0	3.338	0	7.0038
409	ENSG00000233558		0	0	0	3.2114	0	7.0404
410	ENSG00000206452	HLA-C	5.4857	0	5.7752	4.4812	0	0
411	ENSG00000104783	KCNN4	0.2426	0	5.7217	2.1591	5.995	6.0527
412	ENSG00000130433	CACNG6	5.1701	6.0275	0	0	0	0
413	ENSG00000130005	GAMT	8.9349	8.552	4.3385	2.8399	2.5607	3.2748
414	ENSG00000226094	RPL7P3	6.2638	4.8312	0	0	0	0
415	ENSG00000166557	TMED3	1.3707	1.2102	6.5196	7.3337	6.5771	7.068
416	ENSG00000064666	CNN2	1.7561	1.3289	7.514	6.344	6.5794	7.7728
417	ENSG00000170374	SP7	0	0	5.0593	3.9047	0.6703	6.7299
418	ENSG00000144810	COL8A1	0.8243	1.3414	7.1737	6.717	6.7395	3.33
419	ENSG00000189320	FAM180A	0.1449	0.0981	6.0505	4.1259	5.6635	6.2737
420	ENSG00000175946	KLHL38	4.9545	6.4108	0	0	0.0868	0.627
421	ENSG00000187642	PERM1	7.2272	6.7404	1.8724	0.4077	1.5442	2.3062
422	ENSG00000142661	MYOM3	7.3805	7.0359	2.3403	2.08	1.4102	0.9743
423	ENSG00000275575	PTP4A3	8.9441	8.9795	4.1314	1.823	4.026	5.17
424	ENSG00000164161	HHIP	0.0825	0.2081	6.2965	6.3738	2.9052	5.1384
425	ENSG00000172349	IL16	0.7556	0.4226	6.1646	5.4087	4.8011	7.3336
426	ENSG00000189186	DCAF8L2	0.3851	0.1141	6.2902	5.3125	0.0881	0.4736
427	ENSG00000121769	FABP3	8.9169	9.9782	3.0693	3.2819	6.1417	4.9384
428	ENSG00000134285	FKBP11	1.4913	0.6871	6.5364	6.8047	6.4559	6.7475
429	ENSG00000185920	PTCH1	1.7225	2.739	7.9251	8.513	3.2647	6.2903
430	ENSG00000102313	ITIH6	0.8436	0.5697	6.0643	7.4979	1.962	4.3516
431	ENSG00000131459	GFPT2	1.4881	1.4474	6.8344	6.5327	7.7269	6.7868
432	ENSG00000149043	SYT8	0	0	7.0347	5.2035	3.4458	4.6634
433	ENSG00000204463	BAG6	0	6.1198	0	0.3916	4.8048	4.933
434	ENSG00000170162	VGLL2	4.9642	6.1684	0	0	0	0.2961
435	ENSG00000163501	IHH	0	0	4.2018	5.7589	0.6833	5.9666
436	ENSG00000136826	KLF4	3.004	2.6366	6.5537	8.7753	9.1782	7.7628
437	ENSG00000167588	GPD1	6.0491	8.2765	2.4175	1.3025	1.1887	2.8592
438	ENSG00000156966	B3GNT7	0.3907	0.1785	6.1855	6.5341	4.7407	5.2061
439	ENSG00000173546	CSPG4	2.7365	2.9735	8.3885	8.3912	6.6203	9.1564
440	ENSG00000273622	CDC42EP5	0	0	0	4.1877	5.3685	5.8035
441	ENSG00000087085	ACHE	5.5965	5.973	0	0.0962	0.5595	0.4768
442	ENSG00000167619	TMEM145	0.7053	0.3657	5.753	4.5338	2.7438	7.5427
443	ENSG00000233597		0.5709	0.3424	0	3.2776	0.7462	7.3517
444	ENSG00000112782	CLIC5	5.6166	6.605	0.4151	0.5168	0.5691	1.0761
445	ENSG00000168389	MFSD2A	0	0	1.3366	0.9483	7.4611	0.7338
446	ENSG00000277236	CCL14	3.86	3.2379	1.7833	0	7.5502	0
447	ENSG00000163833	FBXO40	5.5122	5.8514	0.3252	0.0747	0.1298	0.1582
448	ENSG00000087245	MMP2	3.5773	3.917	9.5043	8.4005	9.7094	9.1166
449	ENSG00000161281	COX7A1	9.9796	10.2963	5.7223	4.9553	6.3113	3.1486
450	ENSG00000020633	RUNX3	0.0964	0.6339	6.5164	6.5107	3.4995	5.1189
451	ENSG00000165973	NELL1	0	0	4.4336	6.312	0	0
452	ENSG00000087303	NID2	2.4944	1.6023	8.0102	7.5523	6.0018	7.7695
453	ENSG00000169439	SDC2	3.5418	3.2583	7.8828	8.8977	7.6872	10.0606
454	ENSG00000168913	ENHO	0.4757	0.1478	5.2857	5.4887	2.043	6.7452
455	ENSG00000236571		0	0	0	3.8759	0	6.5771
456	ENSG00000163359	COL6A3	3.3054	3.6259	9.9811	7.8342	8.982	8.2302
457	ENSG00000122180	MYOG	5.7588	5.3227	0	0	0.1167	0.1586
458	ENSG00000167414	GNG8	0	0	6.246	0	0	4.5007
459	ENSG00000205221	VIT	2.7852	2.1666	6.9547	9.2702	2.8279	4.0196
460	ENSG00000009950	MLXIPL	5.5645	5.9877	0	0.1268	0.1509	1.2088
461	ENSG00000136883	KIF12	0	0	6.8498	4.574	0.6343	1.4366
462	ENSG00000278167	CCL18	0.4266	0	0	0	6.9957	0
463	ENSG00000130592	LSP1	5.0207	4.1265	10.0527	9.0452	7.4894	3.0317
464	ENSG00000087494	PTHLH	0	0	0.6271	1.3324	7.175	3.6928
465	ENSG00000141161	UNC45B	4.9962	6.424	0.2997	0.0595	0	1.115
466	ENSG00000272398	CD24	0	0.13	3.9572	2.6508	5.6166	6.8708
467	ENSG00000100292	HMOX1	4.1086	4.6164	6.2176	3.4744	10.934	3.8181
468	ENSG00000229338	NME2P3	0.9576	0	0	2.9501	0	7.0847
469	ENSG00000136383	ALPK3	6.3	7.1165	1.2401	1.0763	1.6661	1.2146
470	ENSG00000105894	PTN	1.2136	0.9486	6.2101	6.8353	4.75	7.272
471	ENSG00000205560	CPT1B	7.3163	7.1844	1.6066	0.8944	3.8147	6.0938
472	ENSG00000230807		0	0	0	3.0333	0	6.8128
473	ENSG00000104549	SQLE	0.2312	0.2226	4.6291	4.9301	5.5465	6.7875
474	ENSG00000005513	SOX8	1.2367	0.6098	7.2854	6.6081	4.5074	5.7561
475	ENSG00000163430	FSTL1	3.4203	3.5454	8.191	9.0154	9.3046	8.9614
476	ENSG00000187955	COL14A1	1.2462	1.7764	6.4425	5.8131	8.4234	5.6681
477	ENSG00000103512	NOMO1	0.5864	4.883	0	0	4.211	6.3376
478	ENSG00000170323	FABP4	6.6876	5.1304	3.9002	0.3976	6.3385	0.4687
479	ENSG00000204323	SMIM5	0.5041	0.5798	5.4852	6.0485	2.9255	6.8567
480	ENSG00000198618	PPIAP22	0	0	0	3.6958	0	6.5645
481	ENSG00000164122	ASB5	5.6195	5.9802	0	0.3751	0	1.7208
482	ENSG00000164949	GEM	0.8094	0.4548	4.6799	6.7122	6.7122	2.636
483	ENSG00000163050	COQ8A	9.491	9.4613	3.3422	4.3061	4.2777	4.5631
484	ENSG00000049540	ELN	3.7407	2.894	9.1926	6.9823	9.6983	7.3954
485	ENSG00000095752	IL11	0	0	4.3057	1.7632	7.2258	2.0053
486	ENSG00000006747	SCIN	0.4028	0.4249	4.597	5.8059	3.7558	7.1567
487	ENSG00000166794	PPIB	4.7419	4.5171	9.631	10.3061	9.9714	10.106
488	ENSG00000214484	RPSAP28	0	0	0	2.909	0	6.7782
489	ENSG00000004776	HSPB6	10.8847	10.7308	6.9669	3.8236	6.9729	5.8352
490	ENSG00000214097	SMCO1	4.7586	5.955	0	0	0	0.0888
491	ENSG00000136689	IL1RN	0	0	2.3266	0	6.8831	0
492	ENSG00000129538	RNASE1	5.8802	5.6794	4.2154	0.8385	8.1673	1.5991
493	ENSG00000131242	RAB11FIP4	0.0421	0.0309	4.721	4.7039	3.8092	6.8608
494	ENSG00000131668	BARX1	0	0	5.6854	5.0596	0.1382	0
495	ENSG00000125844	RRBP1	3.5024	3.177	9.0824	8.3991	8.2866	8.8513
496	ENSG00000198682	PAPSS2	1.8946	2.0969	7.293	8.1209	5.3178	7.387
497	ENSG00000187243	MAGED4B	0.3903	0.4645	6.4286	5.5921	4.9787	5.7929
498	ENSG00000282283	PLPPR3	0	0	4.9112	0	0	5.7332
499	ENSG00000067606	PRKCZ	0.4345	0.0975	6.0807	6.39	2.8485	4.795
500	ENSG00000127418	FGFRL1	2.7805	2.7206	8.88	8.049	4.0099	7.1903
501	ENSG00000120885	CLU	5.1862	4.7867	9.4208	11.1898	10.8219	8.0741
502	ENSG00000175063	UBE2C	0	0	5.0666	4.351	3.7407	6.7371
503	ENSG00000241030	RPL29P24	0.815	0.8772	1.0566	3.2217	0	7.4084
504	ENSG00000115009	CCL20	0	1.086	0	1.1246	7.2527	2.8443
505	ENSG00000007314	SCN4A	5.134	5.9477	0.2959	0.0285	0.6937	0.0095
506	ENSG00000166145	SPINT1	0	0	1.0442	0.0488	3.375	6.8254
507	ENSG00000225581	TRIM53AP	0	0	1.915	2.2796	0.5995	7.2658
508	ENSG00000182379	NXPH4 ENSG00000182379	0.1446	0.3543	5.5032	4.5437	2.8942	6.8443
509	ENSG00000092621	PHGDH	1.1086	1.0244	5.4792	5.4758	5.031	7.9729
510	ENSG00000197614	MFAP5	3.8406	4.2425	6.1951	3.5286	9.2824	1.2176
511	ENSG00000184702	SEPTIN5	3.2957	2.1654	8.7834	6.938	5.2405	8.5723
512	ENSG00000171310	CHST11	0.1453	1.0755	4.5463	6.7208	5.1751	6.2621
513	ENSG00000226781	TBCAP1	0	0	0	3.8589	0	6.3244
514	ENSG00000081041	CXCL2	3.5394	4.1007	1.4604	2.2368	9.1837	3.041
515	ENSG00000171848	RRM2	0.0766	0	5.894	4.9125	4.3972	5.7392
516	ENSG00000125144	MT1G	1.0523	1.6475	5.1147	7.9512	6.7632	4.6507
517	ENSG00000165496	RPL10L ENSG00000165496	0	0	0	3.5718	0	6.4304
518	ENSG00000134531	EMP1	2.2057	3.1973	6.8113	7.5812	9.4508	6.1211
519	ENSG00000103335	PIEZO1	3.3358	2.5802	8.0021	6.2999	8.4536	8.9641
520	ENSG00000181524	RPL24P4	0.5317	0	0	3.1043	0	6.7174
521	ENSG00000198417	MT1F	1.0644	0.4871	5.2915	7.1276	6.1671	3.7875
522	ENSG00000103056	SMPD3	1.7648	0.7809	4.0629	7.9874	0.8329	3.2812
523	ENSG00000196565	HBG2	3.1783	1.1095	1.9902	8.1514	1.8877	5.7306
524	ENSG00000143546	S100A8	1.8948	2.4431	1.8574	0	7.415	0
525	ENSG00000182580	EPHB3	0.2492	0.1616	5.7643	5.6425	3.3301	5.8752
526	ENSG00000255749	GNAI2P1	0	0	0	3.6438	0	6.3601
527	ENSG00000115738	ID2	2.8453	2.1801	5.0592	5.7673	8.8494	8.2351
528	ENSG00000165092	ALDH1A1	5.2724	5.4584	0	0.058	4.8136	5.5467
529	ENSG00000008517	IL32	5.1895	8.15	4.906	3.8358	7.7202	0.7214
530	ENSG00000173451	THAP2	1.1184	1.1225	3.047	1.9429	8.3691	2.9283
531	ENSG00000123610	TNFAIP6	0.7013	0.3868	3.8626	3.9516	7.8803	3.3176
532	ENSG00000157613	CREB3L1	1.1603	1.1329	7.5524	5.6368	6.4685	4.2203
533	ENSG00000100427	MLC1	0.1026	0	0.2977	0.0637	2.2134	6.8581
534	ENSG00000148677	ANKRD1	6.702	3.3613	0	0	0.6408	0.1935
535	ENSG00000122691	TWIST1	0.3032	0.0893	6.1833	3.9276	5.6744	5.2087
536	ENSG00000129009	ISLR	3.52	3.1162	8.4362	7.6836	8.8574	8.9926
537	ENSG00000256984		0	0	5.0524	4.3306	4.367	6.4192
538	ENSG00000026025	VIM	7.2097	6.2487	12.3409	12.1404	11.9213	11.0857
539	ENSG00000011028	MRC2	3.9854	2.9385	9.1733	8.5743	8.3001	8.4701
540	ENSG00000070182	SPTB	5.6892	7.1224	1.5071	0.9508	1.0662	1.5192
541	ENSG00000019582	CD74	7.2876	6.7879	7.2861	4.6432	10.0187	2.0874
542	ENSG00000155660	PDIA4 ENSG00000155660	2.4403	2.5484	7.4324	8.4703	6.2385	7.9478
543	ENSG00000125744	RTN2	7.9798	8.5378	2.2733	2.8383	3.3094	5.3093
544	ENSG00000125430	HS3ST3B1	0.0565	0.7338	5.0614	6.9624	1.9518	4.3425
545	ENSG00000170961	HAS2	0.2231	0.033	2.3905	4.5223	7.1378	3.3438
546	ENSG00000275833		0	0	7.1409	4.0388	2.1575	2.7347
547	ENSG00000026508	CD44	2.8282	2.7924	6.9039	5.0995	9.8084	4.2882
548	ENSG00000138650	PCDH10	0.0145	0.0316	4.8344	6.3793	2.2673	4.8095
549	ENSG00000197594	ENPP1	0.8369	0.686	5.7643	7.5121	4.1798	3.6933
550	ENSG00000120708	TGFBI	3.8031	3.5544	9.8363	7.0937	9.3991	7.6549
551	ENSG00000106538	RARRES2	3.7016	3.9305	4.7423	2.0398	9.1948	1.7586
552	ENSG00000184343	SRPK3	7.6066	7.046	4.3172	2.3471	0.5976	4.8919
553	ENSG00000168077	SCARA3	0.6351	0.6523	5.6873	6.8256	5.5865	4.5461
554	ENSG00000235071		0	0	0	2.7666	0	6.5577
555	ENSG00000074410	CA12	0	0	4.7786	5.2953	3.3564	6.1664
556	ENSG00000242265	PEG10	1	0.6759	5.7296	5.4281	4.5603	7.282
557	ENSG00000112655	PTK7	0.7201	0.4648	6.3695	5.6243	5.5721	5.4479
558	ENSG00000022267	FHL1	11.711	11.7953	7.4082	6.76	6.3511	6.0129
559	ENSG00000147872	PLIN2	6.2888	6.9422	1.8981	1.6153	7.4865	2.8094
560	ENSG00000179820	MYADM	3.097	2.6136	7.93	8.4811	8.0013	7.6666
561	ENSG00000083857	FAT1	1.0776	1.6203	5.9968	5.9266	7.5572	6.1244
562	ENSG00000165694	FRMD7	0	0	5.0975	5.3328	0.058	0.0382
563	ENSG00000251668		5.4145	0	0	0	0	4.9538
564	ENSG00000177542	SLC25A22	0.9266	0.2907	6.7469	5.8375	3.7544	5.3914
565	ENSG00000163827	LRRC2	5.225	6.407	0.6575	0.1244	2.3489	0.4586
566	ENSG00000157227	MMP14	2.6046	3.1545	8.5393	7.5418	8.3401	7.5765
567	ENSG00000165917	RAPSN	5.3279	5.8817	0.3251	0.2526	0	1.5756
568	ENSG00000060982	BCAT1	0.6109	0.1273	4.7086	6.5246	4.237	5.7706
569	ENSG00000159307	SCUBE1	0.4895	0	2.4368	1.047	0.8526	7.2109
570	ENSG00000054598	FOXC1	1.1193	0.8219	5.3119	7.2092	5.3177	6.056
571	ENSG00000128573	FOXP2	0.7812	2.2435	1.0179	4.8301	0.2576	7.0005
572	ENSG00000167549	CORO6	8.9296	9.0878	5.33	3.3575	3.0664	4.5845
573	ENSG00000123572	NRK	0.045	0.1711	5.0047	6.7258	1.8871	2.5245
574	ENSG00000134824	FADS2	2.561	2.7709	8.0482	7.226	5.9762	8.7843
575	ENSG00000117122	MFAP2	1.233	0.9962	6.9385	5.1719	7.053	4.3528
576	ENSG00000135046	ANXA1	4.1925	3.1819	8.5933	7.7636	9.9844	8.0608
577	ENSG00000130164	LDLR	1.4423	0.7032	5.7473	5.0696	6.6445	6.8228
578	ENSG00000171570	RAB4B-EGLN2	0.2888	0	5.6548	3.8327	0	5.0399
579	ENSG00000109814	UGDH	1.5082	1.46	5.5778	7.082	7.3806	5.8435
580	ENSG00000243509	TNFRSF6B	1.4774	0.1827	7.5473	2.0051	4.2029	1.4571
581	ENSG00000251630		0	0	4.2246	3.8562	0	5.9813
582	ENSG00000164050	PLXNB1	2.6281	1.2261	6.0478	3.9428	5.5102	8.7145
583	ENSG00000011600	TYROBP ENSG00000011600	2.6969	2.4459	4.0892	0.8178	7.4932	0
584	ENSG00000129038	LOXL1	2.3588	2.2933	7.8348	4.44	7.9326	7.2227
585	ENSG00000168427	KLHL30	4.6663	6.6241	1.96	0.3098	0.3178	0.5306
586	ENSG00000197747	S100A10	5.3642	4.2709	9.6701	8.8371	10.7285	9.9004
587	ENSG00000176692	FOXC2	0.1984	0.3621	5.9961	5.3781	5.636	3.9894
588	ENSG00000115380	EFEMP1	2.4705	2.5531	5.959	7.9383	8.7155	6.5595
589	ENSG00000187091	PLCD1	2.5295	1.615	7.9677	6.5438	6.2557	7.4097
590	ENSG00000164741	DLC1	1.097	0.0816	5.7587	7.027	3.9183	3.2472
591	ENSG00000183386	FHL3 ENSG00000183386	8.0656	10.0183	6.2962	3.4374	4.819	3.3995
592	ENSG00000240388		0	0	2.2321	3.1281	0	6.6793
593	ENSG00000095739	BAMBI	0.6359	0.8313	6.0747	6.9664	3.9625	4.8998
594	ENSG00000172020	GAP43	0	0.1706	3.8145	4.4738	1.4018	6.6273
595	ENSG00000182533	CAV3	5.1934	6.1389	1.237	0.8517	0.126	0.2742
596	ENSG00000131771	PPP1R1B	0.1088	0.049	6.507	4.651	2.7218	4.7612
597	ENSG00000176788	BASP1	1.0229	1.0791	6.1825	3.9939	7.511	4.8147
598	ENSG00000169071	ROR2	0.0605	0	4.4245	5.1026	5.7421	5.1152
599	ENSG00000164294	GPX8	0.5795	0.7223	5.0381	6.2798	5.4249	6.0588
600	ENSG00000163394	CCKAR	0	0	4.3742	5.8851	0	0.4191
601	ENSG00000131473	ACLY	2.3331	2.9189	7.4059	8.2358	6.726	8.1159
602	ENSG00000137573	SULF1	2.1243	2.1631	7.796	6.9653	7.018	3.3064
603	ENSG00000146926	ASB10	5.0712	5.6115	0	0.1451	0	1.1237
604	ENSG00000133048	CHI3L1	0.2731	0.4686	6.9433	2.6905	4.6303	1.2754
605	ENSG00000229353	TNXB	4.4607	3.3614	1.1752	0.1562	6.5765	0
606	ENSG00000229074	HLA-DRB1	0	3.2126	0	0	6.2594	0
607	ENSG00000189409	MMP23B	0.7952	1.211	6.7854	3.697	6.8906	4.4127
608	ENSG00000134532	SOX5	0.4723	0.1152	4.3836	6.523	4.5976	5.126
609	ENSG00000258732		0	0	5.2337	4.9144	0	0
610	ENSG00000101955	SRPX	1.1116	1.9645	7.3893	5.4999	7.054	3.7416
611	ENSG00000230037	UBBP1	0.431	0	0	3.2052	0	6.3655
612	ENSG00000087116	ADAMTS2 ENSG00000087116	0.7656	1.3134	6.9584	4.8381	6.6606	4.4305
613	ENSG00000231878	SNRPFP1	0	0	0	0	0	6.4082
614	ENSG00000007908	SELE	0.2107	0.9514	0	0	6.5671	0
615	ENSG00000172819	RARG	2.6762	1.8932	7.0353	7.1998	5.7534	8.2944
616	ENSG00000169783	LINGO1	0.6388	0.4975	5.6145	6.9003	2.6637	3.9787
617	ENSG00000142156	COL6A1	6.3936	5.8577	12.5617	9.4432	10.7992	10.2254
618	ENSG00000136830	NIBAN2	2.8834	2.6064	8.3293	7.4745	7.1494	7.9599
619	ENSG00000173621	LRFN4	2.3309	2.4877	8.7168	6.284	3.7966	6.9013
620	ENSG00000123989	CHPF	2.5848	2.7539	7.7327	7.0716	7.0677	8.5225
621	ENSG00000099860	GADD45B	3.5725	4.128	7.0584	8.6991	9.5725	9.0764
622	ENSG00000270598		0	0	0	2.8228	0	6.3024
623	ENSG00000076382	SPAG5	1.0857	0.2827	5.6716	3.841	6.3418	5.8235
624	ENSG00000176170	SPHK1	1.0238	0.8234	4.3737	2.0692	7.748	3.3982
625	ENSG00000198542	ITGBL1	1.1392	0.7302	6.3375	5.1675	6.8204	4.2552
626	ENSG00000146147	MLIP	5.491	6.053	0.0502	0.0959	3.3855	1.9936
627	ENSG00000091986	CCDC80	2.8763	2.8703	6.0655	6.763	9.3507	7.5338
628	ENSG00000115884	SDC1	0	0.0878	5.8807	5.1669	4.1621	4.5513
629	ENSG00000184113	CLDN5	5.5548	6.3836	1.0903	0.2658	5.3801	2.372
630	ENSG00000153234	NR4A2	1.5047	1.0113	4.2504	6.0617	7.2377	6.106
631	ENSG00000142765	SYTL1	0.9719	1.1951	6.8494	5.285	2.8478	6.3377
632	ENSG00000270762	FXYD6P1	0	0	0	1.2877	0	6.4757
633	ENSG00000226112	FCF1P4	0	0	0	0	0	6.3429
634	ENSG00000144649	GASK1A	0.3309	0.1658	5.763	5.6695	3.3507	5.0661
635	ENSG00000184232	OAF	3.3175	2.2845	7.409	6.6546	8.3725	8.0848
636	ENSG00000227113		0	0	6.5416	2.7802	0	2.3502
637	ENSG00000267978	MAGEA9B	0	0	4.2414	5.6158	0	0
638	ENSG00000250580	SNRPCP8	0	0	0	3.0686	0	6.1736
639	ENSG00000138131	LOXL4	1.5651	1.6989	4.8343	7.2492	1.0714	0.8982
640	ENSG00000123384	LRP1	3.8927	3.9425	9.1984	8.7309	8.1327	9.307
641	ENSG00000183876	ARSI	0	0.1064	4.1108	3.9713	4.6586	6.3332
642	ENSG00000144785		0	0	4.4226	1.2072	0.6671	6.1135
643	ENSG00000143515	ATP8B2	1.4122	1.0349	6.7355	6.16	4.8341	6.4447
644	ENSG00000244485	RPL18P13	0	0	0	2.8286	0	6.2326
645	ENSG00000177752	YIPF7	5.2894	4.9959	0	0.7759	0	0
646	ENSG00000013588	GPRC5A	0.3297	0.163	2.5357	0.883	7.0353	1.6243
647	ENSG00000179954	SSC5D	1.3118	0.9905	7.0094	4.5408	6.4899	2.8589
648	ENSG00000089685	BIRC5	0.2635	0.2369	5.562	4.3471	3.4868	6.1609
649	ENSG00000137809	ITGA11	0.7409	0.6522	7.1519	5.0984	4.6863	3.3313
650	ENSG00000112773	TENT5A	0.9871	0.2918	4.8875	6.2365	5.9072	4.8937
651	ENSG00000213144		5.3655	4.9223	0	0	5.0335	1.7101
652	ENSG00000135451	TROAP	0.1618	0	5.3769	3.7068	3.2173	6.1203
653	ENSG00000243979		0	0	0	3.0165	0	6.1506
654	ENSG00000216519		0	0	0	3.7229	0	5.8629
655	ENSG00000270313	COX6CP16	0	2.8003	0	0	0	6.2141
656	ENSG00000103196	CRISPLD2	2.1878	2.328	5.1208	7.2606	8.242	6.6634
657	ENSG00000162511	LAPTM5	1.2464	1.7018	3.683	5.5903	7.465	6.4879
658	ENSG00000078328	RBFOX1	5.1534	5.9847	0.1998	0.888	0.1138	2.0599
659	ENSG00000136732	GYPC	5.9106	6.9273	4.3469	3.3471	6.3453	0
660	ENSG00000019169	MARCO	1.4777	0.4845	0	0	6.5145	0
661	ENSG00000106819	ASPN	1.7674	2.0127	6.1976	6.4467	7.8881	3.4869
662	ENSG00000122877	EGR2	0.4791	0.7634	3.6842	6.5622	5.7776	4.7894
663	ENSG00000162692	VCAM1	0.7872	0.8586	3.8141	7.4067	3.8999	1.4789
664	ENSG00000170608	FOXA3	0	0	4.62	5.952	1.6034	4.3224
665	ENSG00000143549	TPM3	12.2312	11.9159	6.6683	6.5347	7.9319	7.9513
666	ENSG00000169231	THBS3	3.3595	2.8626	8.6723	8.6492	7.2166	6.6638
667	ENSG00000116741	RGS2	1.7346	1.0439	5.6185	5.2798	7.7824	5.1016
668	ENSG00000182272	B4GALNT4	0.9636	0.6073	6.2249	3.1148	2.4001	6.5307
669	ENSG00000213303		0	0	0	2.4532	0	6.259
670	ENSG00000154640	BTG3	1.0201	1.1723	5.2824	5.436	6.7347	6.2527
671	ENSG00000230953		2.2228	3.1679	6.6691	4.0244	0	0
672	ENSG00000103175	WFDC1	0.7081	0.5017	5.8656	4.8871	3.586	6.3625
673	ENSG00000139174	PRICKLE1	1.2064	1.1591	5.2512	6.3271	4.7923	7.0668
674	ENSG00000148848	ADAM12	0	0.0338	5.3498	4.2241	5.6298	2.2113
675	ENSG00000116285	ERRFI1	2.314	2.5821	7.073	7.7104	7.163	7.4376
676	ENSG00000134443	GRP	0	0	1.8918	6.341	0	0.1178
677	ENSG00000196611	MMP1	0	0	1.5424	0.2887	6.4698	0.2654
678	ENSG00000220131		0	0	0	1.7986	0	6.3155
679	ENSG00000172061	LRRC15	0.0416	0.0232	5.4816	4.0781	4.964	4.9161
680	ENSG00000135424	ITGA7	7.3956	6.9678	2.48	0.8569	4.5173	3.904
681	ENSG00000117399	CDC20 ENSG00000117399	0	0.3264	5.6601	4.35	3.7267	5.6341
682	ENSG00000233904	HLA-E	6.6565	4.633	6.2455	6.4256	6.7228	0.233
683	ENSG00000105281	SLC1A5	1.6186	2.2079	6.3348	6.4047	6.1851	7.7615
684	ENSG00000183785	TUBA8	5.6207	6.7136	1.471	0.9675	0.9651	2.2564
685	ENSG00000172731	LRRC20	6.6626	7.5209	2.5693	2.5321	1.705	2.2985
686	ENSG00000227357	HLA-DRB4	3.4275	4.306	2.3793	0	6.44	0
687	ENSG00000144802	NFKBIZ	1.0144	2.7237	5.4638	7.2557	6.7783	6.4836
688	ENSG00000188549	CCDC9B	5.694	5.6965	0.8642	0.5439	0.9127	0.9979
689	ENSG00000198842	STYXL2	5.4861	5.964	1.7966	0.1545	0.2943	2.2729
690	ENSG00000262986	SMIM10L1	0	0	1.6539	0	0	6.2786
691	ENSG00000129152	MYOD1	5.3786	4.2726	0	0	0	0
692	ENSG00000134247	PTGFRN	0.5031	1.4027	4.3264	2.9174	7.464	4.7466
693	ENSG00000284995		0	0	0.9398	0	3.1302	6.2106
694	ENSG00000172995	ARPP21	5.4756	6.029	0	1.4466	0.7077	2.5753
695	ENSG00000065675	PRKCQ	4.9609	5.6985	0.6268	0	0.1054	1.9528
696	ENSG00000146477	SLC22A3	2.3625	3.7899	0	0.1664	6.111	0
697	ENSG00000176971	FIBIN	2.7294	2.3598	7.509	8.5801	5.2352	6.1548
698	ENSG00000138166	DUSP5 ENSG00000138166	0.5488	0.4375	3.4875	4.5271	6.9705	4.1337
699	ENSG00000116337	AMPD2	2.2676	1.5594	6.5998	6.8936	6.6875	6.7723
700	ENSG00000142632	ARHGEF19	0.5453	0.2667	5.9406	4.808	3.0948	5.557
701	ENSG00000100003	SEC14L2	0.2203	0.265	5.0355	5.5635	4.5215	4.9966
702	ENSG00000206427	PRRC2A	0.0912	3.8729	0.6295	0.7507	5.6774	5.1394
703	ENSG00000117385	P3H1	2.9458	2.89	8.4351	7.9877	7.1018	7.0017
704	ENSG00000236391		0	0	0	2.6432	0	6.0568
705	ENSG00000154545	MAGED4	0.3689	0.0773	5.0868	5.3831	3.6652	5.4007
706	ENSG00000262655	SPON1	0.5393	0.5713	5.1334	2.8377	6.8192	3.5076
707	ENSG00000152661	GJA1	1.6838	1.6716	6.0308	6.7765	7.1118	5.6711
708	ENSG00000112761	CCN6	0.3679	0.0568	5.0651	5.7837	2.3358	4.7124
709	ENSG00000166592	RRAD ENSG00000166592	7.1717	8.7386	3.9478	2.5355	7.7209	4.169
710	ENSG00000106809	OGN	0.8141	0.9481	4.6048	5.8375	6.7798	4.2563
711	ENSG00000122862	SRGN	3.5497	3.784	2.5388	2.1699	7.8699	0.4931
712	ENSG00000166033	HTRA1	3.6811	3.8146	8.8083	7.568	8.5399	4.0216
713	ENSG00000140379	BCL2A1	0	0	0	0.9349	6.1994	0
714	ENSG00000178860	MSC	2.1331	1.9648	5.1279	1.7498	7.6957	1.6707
715	ENSG00000106348	IMPDH1	2.3539	1.2872	7.1483	5.4178	5.5164	7.2662
716	ENSG00000230678	BRD2	0.6317	1.929	0	1.2191	5.023	6.0688
717	ENSG00000231344		0	0	3.3385	2.9809	0	6.005
718	ENSG00000159216	RUNX1	1.5587	1.595	5.8437	4.1344	7.9214	4.9249
719	ENSG00000236236	TNXB	1.3211	3.4765	0	0.2119	6.1353	4.4067
720	ENSG00000243648	ENSG00000243648	0	0.4298	0	3.0039	0.5358	6.192
721	ENSG00000230758	SNAP23P1	0	0	0	3.2746	0	5.7984
722	ENSG00000118985	ELL2	1.5982	1.7279	5.4731	7.3319	6.4088	3.0049
723	ENSG00000111087	GLI1	0.4789	0.7701	5.44	5.4391	3.617	6.0626
724	ENSG00000067048	DDX3Y ENSG00000067048	0	2.8502	0	2.0318	6.728	2.276
725	ENSG00000282307	SERPINF1	6.3274	4.6297	1.992	2.7832	0	0.2823
726	ENSG00000213864	EEF1B2P2	0	0	0	2.4057	0	6.0523
727	ENSG00000072682	P4HA2	2.0999	2.6123	7.4561	6.2139	6.7899	7.64
728	ENSG00000206340	C4A	2.0296	0	3.9008	1.5685	6.3894	0
729	ENSG00000164877	MICALL2	1.7313	2.0081	7.0768	4.3369	6.3794	7.1087
730	ENSG00000165410	CFL2 ENSG00000165410	8.7584	8.7703	3.8836	5.3574	3.0431	4.6151
731	ENSG00000275691	MT1IP	0	0	0	2.4531	0	6.0338
732	ENSG00000167460	TPM4	4.3958	3.6317	8.7219	7.9676	9.2163	8.8943
733	ENSG00000198467	TPM2	13.6291	14.1485	9.774	8.5009	8.6296	10.4033
734	ENSG00000198805	PNP	1.7735	1.4115	4.1339	4.3465	8.3101	4.205
735	ENSG00000174938	SEZ6L2	0.1899	0.3369	2.8825	6.2611	4.314	4.7668
736	ENSG00000233450	KIFC1	0.0002	0.0002	5.6082	3.9387	0.0099	3.3283
737	ENSG00000198846	TOX	0	0	3.508	5.9128	0.6592	0.1242
738	ENSG00000075035	WSCD2	0.0357	0	4.1596	5.1012	2.1215	5.498
739	ENSG00000131747	TOP2A	0	0	4.5771	4.3782	4.2174	5.5657
740	ENSG00000115963	RND3	0.8579	1.5593	3.7055	5.7548	6.7926	5.8975
741	ENSG00000187741	FANCA	0.8067	0.2909	6.3103	3.4981	4.0885	5.637
742	ENSG00000231679	HLA-DRB3	0	3.2754	0	0	5.7621	0
743	ENSG00000064886	CHI3L2	0.8356	0.3312	5.1123	4.7615	6.246	2.1366
744	ENSG00000148344	PTGES	0.3827	0.5016	4.2439	2.1065	5.4978	5.9435
745	ENSG00000102760	RGCC	5.1848	3.14	8.2727	7.2884	9.5692	4.4361
746	ENSG00000229300	SNHG32	0	2.5811	4.7705	6.0408	3.9316	0.1956
747	ENSG00000141582	CBX4	2.2006	1.0901	4.3969	7.0291	5.3808	6.9765
748	ENSG00000103855	CD276	2.1989	2.0723	7.4641	6.23	7.4448	5.6447
749	ENSG00000129744	ART1	4.902	4.9668	0	0.8967	0	0
750	ENSG00000135245	HILPDA	1.2389	0.7978	7.535	3.9523	4.0137	4.6043
751	ENSG00000138801	PAPSS1	1.7567	1.5686	6.1996	7.1202	4.8134	6.59
752	ENSG00000102359	SRPX2	1.355	0.7112	6.0174	6.3375	5.3975	4.9575
753	ENSG00000105371	ICAM4	0.5285	0.233	0.9429	4.7771	5.6535	0.3824
754	ENSG00000104899	AMH	0.4243	1.8188	0	1.0089	4.7656	5.9392
755	ENSG00000100504	PYGL	1.5419	2.0481	6.9993	7.0649	5.268	6.0865
756	ENSG00000107968	MAP3K8	1.1568	1.0558	2.0649	3.3043	7.6577	2.5976
757	ENSG00000164972	C9orf24	0.5446	0.1372	0	4.1375	4.9324	4.8987
758	ENSG00000172201	ID4	1.3607	0.6447	5.524	6.68	3.9304	5.5039
759	ENSG00000078814	MYH7B	7.909	5.7242	2.7596	2.0421	1.9285	2.4972
760	ENSG00000165810	BTNL9 ENSG00000165810	6.5507	3.8184	0.1906	0.9155	3.0273	0.5835
761	ENSG00000115602	IL1RL1	0.0479	0.0538	0.0611	0.2005	6.1059	0.2177
762	ENSG00000244073	RPS4XP6	0	0	0.4509	1.2851	0	6.2122
763	ENSG00000185028	LRRC14B	4.7526	5.5047	0	0.7105	0.1129	1.0858
764	ENSG00000108342	CSF3	3.5725	4.5057	0	0	5.5183	0.7129
765	ENSG00000233838	DPH3P1	0	0	0	2.1223	0	6.0389
766	ENSG00000167004	PDIA3	4.1586	4.9266	8.4794	9.6702	8.3956	9.8749
767	ENSG00000157680	DGKI	0	0.0505	3.0808	1.9385	6.6313	2.2475
768	ENSG00000176845	METRNL	1.0732	2.7006	6.6704	6.8179	6.715	5.4032
769	ENSG00000089327	FXYD5	3.6484	3.2108	8.9037	6.6609	8.1614	8.0268
770	ENSG00000120251	GRIA2	0	0	0.4443	6.0815	0.0896	0.0506
771	ENSG00000017483	SLC38A5	2.0064	0.8906	7.0266	4.2067	5.7993	1.8815
772	ENSG00000164776	PHKG1 ENSG00000164776	7.0625	7.8069	4.2194	3.2458	3.3887	1.4383
773	ENSG00000162512	SDC3	2.286	1.5431	7.3374	7.0909	3.9537	5.5513
774	ENSG00000151967	SCHIP1	5.5466	6.0276	1.7274	1.0541	1.4399	0.4021
775	ENSG00000175505	CLCF1	0.3877	0.7	3.4678	2.5292	7.0624	1.8756
776	ENSG00000127324	TSPAN8	3.3023	6.004	0	0.8273	0	0.2806
777	ENSG00000185559	DLK1	1.5425	2.6358	0.7917	0	5.6896	5.5997
778	ENSG00000169583	CLIC3	0.7364	0.3031	5.343	5.1928	4.6355	5.5747
779	ENSG00000185633	NDUFA4L2	4.9952	4.5606	10.0658	8.8026	5.8206	9.4629
780	ENSG00000181649	PHLDA2	0.9393	1.1258	5.9171	3.2748	6.4971	1.8079
781	ENSG00000183196	CHST6	0.1191	0.1335	6.0899	4.4672	1.5815	3.3902
782	ENSG00000142173	COL6A2	6.8249	6.6211	12.6797	9.6975	11.4823	9.4409
783	ENSG00000146242	TPBG	1.0717	0.787	5.6504	5.9633	5.7254	5.0289
784	ENSG00000277974	TBC1D3H	0	0	0.0001	0	0	5.9498
785	ENSG00000101255	TRIB3	0.15	0.5302	3.0052	1.7231	2.5165	6.8867
786	ENSG00000006327	TNFRSF12A	4.235	1.2584	6.8178	5.8302	8.234	6.2728
787	ENSG00000213088	ACKR1	3.5044	3.6365	0.1359	0	5.6321	0
788	ENSG00000074842	MYDGF ENSG00000074842	3.7512	3.4179	8.1361	8.7206	7.4269	8.5252
789	ENSG00000166598	HSP90B1	4.9831	5.3628	8.7245	10.1752	9.1256	10.643
790	ENSG00000066468	FGFR2	0.0774	0	5.3101	5.0606	1.1097	3.4378
791	ENSG00000101057	MYBL2	0	0.0538	4.9794	2.8133	3.5267	5.7537
792	ENSG00000243449	C4orf48	1.584	1.6318	7.1164	5.9019	5.4523	6.2491
793	ENSG00000188643	S100A16	3.5208	4.0979	6.6173	2.946	7.5251	0.9735
794	ENSG00000145934	TENM2	0.0384	0.0424	4.6308	5.1219	0.1739	0.6087
795	ENSG00000163661	PTX3	0.0683	0.0753	2.868	2.0241	6.6308	2.8172
796	ENSG00000104723	TUSC3	1.672	1.3495	6.1984	7.0468	4.4637	5.9047
797	ENSG00000121089	NACA3P	0	0	0	2.49	0	5.8953
798	ENSG00000185271	KLHL33	4.8632	4.7132	0	0.1304	0.0885	0.2153
799	ENSG00000000971	CFH	2.4209	3.0198	4.973	6.1938	6.6327	0.3794
800	ENSG00000078098	FAP	1.7566	1.7727	6.3061	4.1225	7.6302	5.4949
801	ENSG00000136717	BIN1	9.3057	10.078	5.4678	3.9713	5.7697	5.6771
802	ENSG00000169515	CCDC8	0.7632	0.3176	5.9066	5.4097	2.4511	4.639
803	ENSG00000211675	IGLC1	0	0	0	0	1.0495	6.0239
804	ENSG00000146674	IGFBP3	3.285	3.2089	7.3965	7.3108	9.0464	7.1156
805	ENSG00000197555	SIPA1L1	1.6482	1.9405	7.1871	7.1312	4.8691	4.8398
806	ENSG00000115594	IL1R1	2.0903	2.7405	5.9278	7.0712	7.5954	3.0098
807	ENSG00000127564	PKMYT1	0.5686	0.2011	6.0832	2.9803	3.0905	5.3925
808	ENSG00000261048		0	0	3.5243	5.4792	0	0
809	ENSG00000186868	MAPT	4.9227	5.8345	0.482	1.2093	0.3491	1.1816
810	ENSG00000158869	FCER1G	2.2388	2.1161	3.8615	0.3456	7.2627	1.7228
811	ENSG00000177238	TRIM72	5.6444	5.9234	0.4959	1.1956	1.6767	1.4041
812	ENSG00000186832	KRT16	0	0	5.6907	2.1996	4.8836	3.2877
813	ENSG00000204310	AGPAT1	3.472	0	4.9421	4.4878	0	0
814	ENSG00000198406	BZW1P2	0.8593	2.4029	0	4.865	6.0487	4.4951
815	ENSG00000197329	PELI1	1.5958	1.2018	4.1435	6.8357	6.1491	5.7356
816	ENSG00000106397	PLOD3	2.9739	2.9932	7.5341	7.5558	6.6056	8.3416
817	ENSG00000228892	AGPAT1	0	4.5763	0	0.5365	4.1284	4.8652
818	ENSG00000107731	UNC5B	0.8569	1.4369	5.9374	4.256	4.8604	6.7851
819	ENSG00000242364		0	0	0	2.5578	0	5.8224
820	ENSG00000163520	FBLN2	4.9157	4.7909	2.0585	1.3008	7.8418	5.5761
821	ENSG00000172156	CCL11	0	0	0.3077	0	5.9254	0
822	ENSG00000174028	FAM3C2P	0	0.311	4.3805	4.8441	3.6829	5.6138
823	ENSG00000135318	NT5E	0.7798	0.7677	4.1668	5.1329	6.5039	2.0528
824	ENSG00000186480	INSIG1	1.7253	2.1491	5.2224	4.6403	7.9322	6.3084
825	ENSG00000138028	CGREF1	1.4113	1.4922	5.95	7.2546	4.2484	2.8879
826	ENSG00000179388	EGR3	0.4705	0.7452	3.583	5.6908	6.119	3.9345
827	ENSG00000158321	AUTS2	3.0486	2.4967	7.9785	7.4069	5.2069	7.4315
828	ENSG00000181418	DDN	5.5251	5.4645	0.2862	1.1162	0.545	2.7616
829	ENSG00000176014	TUBB6	3.0813	2.9567	7.4763	5.5776	8.5568	7.4118
830	ENSG00000074800	ENO1 ENSG00000074800	5.6932	5.9291	10.2037	10.3055	9.7171	11.1516
831	ENSG00000124134	KCNS1	0	0	2.4208	4.0148	1.2061	6.007
832	ENSG00000143387	CTSK	2.1392	2.5895	6.4386	6.9249	7.9859	5.0792
833	ENSG00000105722	ERF	3.628	3.4129	8.1034	7.8454	7.5386	8.7848
834	ENSG00000123975	CKS2	1.859	1.4284	4.8058	6.0461	6.6544	6.7252
835	ENSG00000038427	VCAN	0.8591	1.0595	4.4055	3.9925	7.2513	4.1781
836	ENSG00000183010	PYCR1	3.1879	2.6491	7.8878	8.0204	6.1351	7.3061
837	ENSG00000117983	MUC5B	0.0616	0.0344	5.9049	0.2218	0.0087	0.0376
838	ENSG00000103187	COTL1	1.9003	2.3341	6.5428	4.8272	6.5687	7.6003
839	ENSG00000187017	ESPN	0.0521	0.029	4.0826	3.388	0.1198	5.3163
840	ENSG00000112977	DAP	1.9971	1.8679	6.8871	6.0162	6.1995	6.8534
841	ENSG00000110799	VWF ENSG00000110799	5.5223	5.1927	2.3513	0.8463	6.846	1.9954
842	ENSG00000162614	NEXN	7.1544	7.3089	2.9622	1.8187	3.9293	2.576
843	ENSG00000180581	SRP9P1	3.8907	3.8296	0	0	0	5.0721
844	ENSG00000111665	CDCA3	0.3777	0.3423	5.2142	4.047	3.2326	5.9004
845	ENSG00000163565	IFI16	3.279	3.3399	4.84	4.1198	7.5785	0.2981
846	ENSG00000011478	QPCTL	1.1139	0.3878	6.7447	4.3083	2.5627	4.492
847	ENSG00000167771	RCOR2 ENSG00000167771	1.2913	0.8251	5.2089	4.5041	2.5288	6.8429
848	ENSG00000111206	FOXM1	0.6806	0.6634	5.9104	4.1395	4.0434	5.8608
849	ENSG00000163682	RPL9	5.4511	8.8871	5.5355	6.4438	10.4217	10.549
850	ENSG00000235681		3.8546	3.9694	7.1191	2.6994	0	2.0949
851	ENSG00000275079	LPCAT1	0	0	0	3.5095	3.9854	5.1444
852	ENSG00000104447	TRPS1	0.5155	0.6171	4.3693	6.1405	3.6495	5.254
853	ENSG00000166803	PCLAF	1.0251	0.0658	5.2864	5.1955	3.6193	5.5064
854	ENSG00000156535	CD109	0.3338	0.1545	4.5778	5.6571	3.9904	4.5993
855	ENSG00000127325	BEST3	4.3587	5.5278	0.7597	0.8191	0	0.2478
856	ENSG00000125841	NRSN2	0.8505	0.9716	6.2197	4.8251	4.7052	5.6953
857	ENSG00000285132		4.7133	4.9141	0	1.4994	0	0
858	ENSG00000137507	LRRC32	2.9074	3.9952	2.9477	0.3619	6.3952	0.0359
859	ENSG00000188483	IER5L	1.3984	0.9977	6.7896	4.0773	4.3185	6.0725
860	ENSG00000171811	CFAP46	4.5995	4.9483	0.7458	0	0.2029	0
861	ENSG00000137868	STRA6	0	0	0.4922	0.3295	4.2991	5.1622
862	ENSG00000125657	TNFSF9	0.2308	0.6556	1.4414	0.98	6.6317	2.3494
863	ENSG00000197632	SERPINB2	0	0	0.9007	0	5.8903	0
864	ENSG00000171223	JUNB	5.5645	5.8673	9.849	10.8702	10.2325	9.9569
865	ENSG00000111057	KRT18	0.5739	0	2.1886	3.7952	3.8298	6.3455
866	ENSG00000112186	CAP2	6.7624	7.8105	3.3269	2.6007	2.5412	2.7305
867	ENSG00000074047	GLI2	0.266	0.698	5.1288	4.4953	4.7204	5.582
868	ENSG00000239865	RPP21	0	4.5818	0	0.6761	4.7319	4.1586
869	ENSG00000214269	LGMNP1	0	0	0	3.8475	0	5.1377
870	ENSG00000105329	TGFB1	3.0117	1.8843	7.8363	5.8449	6.593	6.8607
871	ENSG00000283149		0.3201	0	2.2217	3.5022	4.8263	5.7641
872	ENSG00000130300	PLVAP	2.9981	2.7809	3.9596	0	6.8158	1.2202
873	ENSG00000197582	GPX1P1	0	0	0	2.5387	0	5.7053
874	ENSG00000267340	ENSG00000267340	0	0	4.7604	4.0066	0	4.0284
875	ENSG00000198692	EIF1AY	0	5.5962	0	0.4947	4.0674	2.4983
876	ENSG00000182168	UNC5C	0.1599	0.0564	4.4422	5.9794	1.9589	2.3468
877	ENSG00000117519	CNN3	3.1128	3.0271	7.1642	7.8617	7.702	7.6678
878	ENSG00000188037	CLCN1	4.9378	4.4953	0.48	0.0729	0	0.1844
879	ENSG00000130827	PLXNA3	2.6249	2.0008	7.4813	6.0495	4.9756	7.4022
880	ENSG00000179431	FJX1	0.0529	0.4557	4.3075	5.889	4.529	3.3339
881	ENSG00000110195	FOLR1	0	0	2.5293	3.907	2.0179	6.0839
882	ENSG00000120254	MTHFD1L	0.1025	0.1904	4.1704	3.6778	5.0005	5.3247
883	ENSG00000104635	SLC39A14	1.905	3.3672	6.7613	7.7084	7.3645	5.7069
884	ENSG00000166741	NNMT	4.5277	6.1629	8.9171	7.1602	10.9544	5.7237
885	ENSG00000276155	MAPT	3.9944	5.0087	0	0.0384	0	0
886	ENSG00000101144	BMP7	0.0312	0	0	0.2264	3.8452	5.1927
887	ENSG00000169902	TPST1	1.4513	1.3732	5.7316	5.961	6.0422	6.0257
888	ENSG00000159167	STC1	0.0323	0.9084	0.776	0.2975	6.2351	2.4851
889	ENSG00000249751	ECSCR	3.8414	3.2862	0	0	5.2149	0
890	ENSG00000166343	MSS51	4.7989	6.4608	2.7471	1.6114	0.5972	0.8745
891	ENSG00000073060	SCARB1	2.7812	3.9077	6.7193	5.8888	4.9562	9.4442
892	ENSG00000224594	RPL29P19 ENSG00000224594	0	0	6.1743	2.4361	3.3354	1.4771
893	ENSG00000230106	SNRPCP15	0	0	0	1.5361	0	5.8302
894	ENSG00000196465	MYL6B	10.6699	9.5928	6.1267	5.1397	5.3391	6.3871
895	ENSG00000160957	RECQL4	1.0389	1.6608	6.1035	3.5583	4.7041	6.8128
896	ENSG00000235225	RPL31P17	0	0	0	2.1418	0	5.7475
897	ENSG00000261554		0	0.5881	3.2204	5.5852	0	0
898	ENSG00000114923	SLC4A3	0.7201	0.4191	4.231	3.5052	3.0896	6.6894
899	ENSG00000188501	LCTL	0.1916	0.092	5.0087	4.0948	1.4614	4.9956
900	ENSG00000197616	MYH6	5.2277	3.9701	0.3666	0.216	0	0.0627
901	ENSG00000156299	TIAM1	0.3646	1.015	3.6405	5.9871	4.4526	5.4842
902	ENSG00000142634	EFHD2	2.0511	1.8955	6.6044	5.0651	7.1856	6.2145
903	ENSG00000285283		0	0	0	5.1886	0	3.588
904	ENSG00000188763	FZD9	1.814	2.1055	5.5666	6.1559	1.6593	6.4467
905	ENSG00000228453	RPS15AP9	0	0	0	1.2198	0	5.801
906	ENSG00000267595	BRCA1P1 ENSG00000267595	0	0	5.0041	4.1634	0	3.106
907	ENSG00000235307	BRD2	0.3753	4.5485	2.38	2.6432	7.0679	4.6855
908	ENSG00000244731	C4A	2.6238	2.774	6.8191	4.9628	6.4039	8.4149
909	ENSG00000137563	GGH	1.3258	0.6651	3.5266	5.6296	4.2667	6.5223
910	ENSG00000167695	TLCD3A	1.1095	0.6284	5.8108	5.4661	5.0634	4.8534
911	ENSG00000099260	PALMD	5.0308	5.2965	0.1449	0.1936	3.8432	1.9861
912	ENSG00000119508	NR4A3	1.062	1.8308	0.8393	4.2501	6.9171	2.7496
913	ENSG00000056998	GYG2	0.489	0	5.0726	5.326	1.9802	3.9577
914	ENSG00000182704	TSKU	1.2181	1.4516	5.8639	4.7931	5.683	6.4303
915	ENSG00000196576	PLXNB2	3.4967	2.7721	8.1633	6.9597	6.3404	8.0778
916	ENSG00000273850	PPP2R3B	7.2011	7.338	8.3925	8.4415	3.8376	3.1667
917	ENSG00000144655	CSRNP1	1.9615	3.3452	5.6223	6.9448	8.2867	5.235
918	ENSG00000092969	TGFB2	1.8521	1.6364	4.7451	7.565	3.0786	2.0102
919	ENSG00000066248	NGEF	1.5766	0.3917	5.2428	5.3543	5.2019	5.7164
920	ENSG00000141469	SLC14A1	1.2001	0.6531	4.5389	6.4564	1.4745	1.6066
921	ENSG00000250703		0	0	0	0	0	5.6498
922	ENSG00000237916	RPL37P12	0	0	5.5605	3.0229	2.9488	0
923	ENSG00000186998	EMID1	1.1344	0.5969	6.3864	5.5171	3.1096	3.7245
924	ENSG00000183036	PCP4	0	0	4.9252	4.3565	0	1.0975
925	ENSG00000235893		1.3913	0.3767	6.4063	3.9104	1.0995	4.0364
926	ENSG00000122952	ZWINT	0.1626	0	5.0529	4.2203	3.0833	4.9413
927	ENSG00000122641	INHBA	0.155	0.0224	4.2718	3.625	5.7407	2.195
928	ENSG00000149380	P4HA3	0.9559	0.3683	5.2012	3.5804	5.561	1.0249
929	ENSG00000215187	FAM166B	5.294	6.248	1.5496	1.4066	0.6297	2.3799
930	ENSG00000264971	PRR13P4	0	0	0	2.5901	0	5.541
931	ENSG00000099849	RASSF7	0.9941	0.074	5.214	4.014	2.1977	5.6895
932	ENSG00000069188	SDK2	0.0113	0.3444	4.3941	4.8331	2.6833	5.2342
933	ENSG00000059573	ALDH18A1	1.2316	1.3405	5.9842	6.345	4.5012	5.4156
934	ENSG00000123342	MMP19	0.5014	0.6311	2.5523	0.8093	6.4851	1.3962
935	ENSG00000113161	HMGCR	1.3185	0.8127	3.9143	5.5522	5.4685	6.1113
936	ENSG00000077238	IL4R	1.8274	3.4	4.4376	1.5419	6.5566	0.1931
937	ENSG00000158292	GPR153	0.4031	0.651	5.3224	1.5135	4.3555	5.1394
938	ENSG00000135052	GOLM1	1.8432	2.2248	6.1914	6.8232	6.7374	5.8943
939	ENSG00000135821	GLUL	6.7343	10.1573	4.4168	4.7457	8.0632	4.7906
940	ENSG00000154175	ABI3BP	2.972	1.6659	6.9389	6.4362	7.0508	3.9491
941	ENSG00000149485	FADS1	0.9923	0.8815	5.7383	5.2649	3.9199	5.7667
942	ENSG00000150961	SEC24D	0.9195	1.5151	5.3151	6.2619	5.3117	5.4245
943	ENSG00000206306	HLA-DRB1	0	2.8573	0	0	5.4246	0
944	ENSG00000164105	SAP30	1.711	2.513	6.6399	6.8952	3.942	6.51
945	ENSG00000069849	ATP1B3	3.0522	3.4499	7.1333	7.3006	8.6642	6.9446
946	ENSG00000123131	PRDX4	3.5096	4.1389	7.4115	9.3157	7.51	7.8747
947	ENSG00000059804	SLC2A3	1.752	2.536	5.3091	3.0456	7.8807	5.3309
948	ENSG00000164300	SERINC5	0.6338	1.3295	3.7869	6.514	3.1159	5.4562
949	ENSG00000139263	LRIG3	1.7343	0.9837	5.7658	5.3945	5.1985	6.3758
950	ENSG00000137807	KIF23	0.1641	0.0449	4.3682	4.2304	3.5188	5.3667
951	ENSG00000088340	FER1L4	0.663	0.9465	5.9042	4.7666	2.6957	5.3614
952	ENSG00000158270	COLEC12	1.6681	1.0394	5.4198	6.6793	4.4597	5.5693
953	ENSG00000167397	VKORC1	3.9132	3.7978	7.9905	9.0738	7.7415	7.8709
954	ENSG00000284794		4.2004	0	3.304	3.659	0	5.5016
955	ENSG00000135069	PSAT1	0.098	0.4088	2.7075	2.3119	2.966	6.435
956	ENSG00000169710	FASN	3.2689	2.1639	7.2483	5.1561	7.1986	7.4433
957	ENSG00000170627	GTSF1	0.0836	0.0921	4.0295	5.2373	0.6318	0.4454
958	ENSG00000077782	FGFR1 ENSG00000077782	3.8155	3.6018	9.0239	7.759	7.5096	7.6128
959	ENSG00000136997	MYC	2.3292	3.7841	5.8126	7.5667	7.9429	7.2064
960	ENSG00000100644	HIF1A	2.188	2.7135	6.4065	6.8541	7.658	5.7478
961	ENSG00000065485	PDIA5	2.0986	1.1169	5.6225	6.207	5.4114	6.3846
962	ENSG00000116690	PRG4	0.3711	1.8153	3.1039	0.9118	6.6275	1.5502
963	ENSG00000111674	ENO2	2.3155	1.2725	6.9933	4.7421	4.1806	6.5822
964	ENSG00000093009	CDC45	0.0796	0.2486	4.3219	3.3918	3.2052	5.8052
965	ENSG00000198648	STK39	0.7385	1.5097	5.5193	6.4816	3.7852	4.7842
966	ENSG00000109846	CRYAB	11.8047	11.4852	7.6049	6.9537	6.682	8.4045
967	ENSG00000185022	MAFF	1.1302	3.7499	4.3033	6.7358	7.3515	5.597
968	ENSG00000142669	SH3BGRL3	4.3191	2.9142	9.0396	6.4908	7.9326	6.6774
969	ENSG00000162745	OLFML2B	1.5379	1.6158	6.6149	3.3187	6.3625	5.0542
970	ENSG00000197496	SLC2A10	0.2856	0.6926	4.7072	5.7917	3.2569	4.5832
971	ENSG00000109062	SLC9A3R1	1.4916	1.5812	6.1968	5.7029	4.7627	6.4486
972	ENSG00000185437	SH3BGR	8.606	8.4436	4.8213	4.6562	3.1124	7.1898
973	ENSG00000160539	PLPP7	6.4892	7.0855	3.7557	2.7695	2.6551	1.4503
974	ENSG00000277656	GSTT1	0.5837	5.3592	0	2.0753	4.4743	4.5162
975	ENSG00000176720	BOK	1.0172	1.1911	6.0708	6.207	3.9851	3.9742
976	ENSG00000130066	SAT1	5.2855	4.5938	7.1963	9.5248	10.319	7.7647
977	ENSG00000243009	RPP21	3.8372	0.0024	4.2965	4.2175	0	0
978	ENSG00000188042	ARL4C	0.2855	0.2995	4.5041	3.7383	5.6892	3.9267
979	ENSG00000071539	TRIP13	0.226	0.1045	4.9703	5.0302	3.3229	4.1474
980	ENSG00000099331	MYO9B	3.5827	2.8139	7.9756	6.1822	7.7495	7.5824
981	ENSG00000225614	ZNF469	0.1883	0.5622	5.0677	3.813	4.7476	4.9918
982	ENSG00000117308	GALE	1.8661	1.9242	5.5921	5.9005	3.949	7.4104
983	ENSG00000129911	KLF16	0.9337	1.3695	6.1679	4.8013	5.0827	5.6182
984	ENSG00000109107	ALDOC	1.7653	1.2039	5.82	6.0878	3.0143	5.996
985	ENSG00000173705	SUSD5	0.7295	1.0782	4.8718	6.4139	2.4054	4.2487
986	ENSG00000231555	HSPA1B	4.7128	0	2.1203	4.4689	0	0.0005
987	ENSG00000164093	PITX2	4.7502	6.1492	0.5945	1.396	1.2116	1.725
988	ENSG00000227097	RPS28P7	8.7097	8.1693	3.3387	6.7533	7.2849	9.8694
989	ENSG00000106080	FKBP14	0.7514	0.6249	4.7984	6.1134	4.1316	4.2571
990	ENSG00000275993	SIK1B	0.8119	3.2916	2.8273	1.83	7.3175	4.068
991	ENSG00000226278	PSPHP1	4.3793	3.2822	0	3.8051	0	5.2195
992	ENSG00000183098	GPC6 ENSG00000183098	0.2457	0.0823	4.8282	5.3379	3.6818	2.8588
993	ENSG00000255319	ENPP7P8	0.1037	0	4.7068	3.3568	0.3735	4.443
994	ENSG00000145721	LIX1	0	0	3.137	5.1419	0.1913	3.6631
995	ENSG00000215183	MSMP	0	0	0.8034	5.6012	0	0
996	ENSG00000234371	RPSAP31	0	0	1.453	2.435	0	5.6964
997	ENSG00000075420	FNDC3B	1.4479	1.7634	5.5589	6.6816	6.0223	4.9611
998	ENSG00000172348	RCAN2	5.5109	4.6829	0.5112	0.3115	2.1114	0.8921
999	ENSG00000164626	KCNK5	0	0	3.2119	4.6123	3.932	4.9739
1000	ENSG00000206395	DDAH2	0	0.4233	1.2148	0.5083	4.6649	4.9496
1001	ENSG00000129910	CDH15	4.8703	4.9245	3.5428	0.815	0.4558	0.152
1002	ENSG00000270236		0	0	3.609	2.7874	0	5.1446
1003	ENSG00000145050	MANF	2.4682	3.1282	6.7559	6.7449	7.1651	7.6063
1004	ENSG00000042493	CAPG	2.2928	1.8611	6.3978	4.2407	6.5481	6.8539
1005	ENSG00000262759	MRPS21P9	0	0	0	5.474	0	0
1006	ENSG00000158315	RHBDL2	0.4417	0.4808	3.6786	4.9246	1.2257	5.3189
1007	ENSG00000204653	ASPDH	0.4248	1.6984	5.5131	4.0136	1.1388	5.4154
1008	ENSG00000162723	SLAMF9	0	0	0.901	2.0277	3.8218	5.5224
1009	ENSG00000185915	KLHL34	3.0791	5.2216	0.0403	0.063	0	0.021
1010	ENSG00000179241	LDLRAD3	0.5269	1.2679	4.4711	6.6983	3.5405	3.6136
1011	ENSG00000044524	EPHA3	0.4858	0.3548	4.4546	5.8849	2.4744	3.9346
1012	ENSG00000168453	HR	1.0609	1.5317	5.7149	5.7882	5.1253	5.6951
1013	ENSG00000143125	PROK1	0	0	3.5018	5.8438	1.8783	2.6266
1014	ENSG00000108679	LGALS3BP ENSG00000108679	3.7184	3.3669	6.0482	4.658	7.792	1.3838
1015	ENSG00000229601		0	0	5.4725	2.1352	0	0
1016	ENSG00000163820	FYCO1	6.1594	6.8181	2.4104	2.0613	2.153	2.1683
1017	ENSG00000176485	PLAAT3	5.4777	6.2783	1.9275	1.8813	4.2432	0.7478
1018	ENSG00000182481	KPNA2	2.1076	1.7636	4.4641	5.442	7.4019	6.0174
1019	ENSG00000167513	CDT1	0.0773	0	5.4796	2.498	1.9328	4.3845
1020	ENSG00000185105	MYADML2	5.1579	4.6599	1.3254	1.1869	0	0.3579
1021	ENSG00000144355	DLX1	0	0.1809	5.0131	4.5947	1.2719	3.486
1022	ENSG00000176043		0	0	0	2.7136	0	5.3019
1023	ENSG00000256673		0	0	2.4686	2.1593	4.336	5.4672
1024	ENSG00000167772	ANGPTL4 ENSG00000167772	5.383	2.935	7.399	3.3376	8.639	5.5253
1025	ENSG00000118515	SGK1	2.5819	2.4658	3.7789	5.5593	8.2144	5.8424
1026	ENSG00000148357	HMCN2	3.91	3.7997	0.2236	0.1387	5.1673	0.6709
1027	ENSG00000112530	PACRG	1.2971	1.3369	6.2809	2.8721	3.7325	0.0559
1028	ENSG00000250796		0	0	3.8673	3.0272	5.6344	2.0275
1029	ENSG00000142449	FBN3	0.8151	0.0867	0	0	3.3417	5.2875
1030	ENSG00000162645	GBP2	4.591	4.3428	0.9206	0.6941	4.9656	0.2394
1031	ENSG00000260157		0	0	2.9158	5.2067	0	0
1032	ENSG00000134769	DTNA	5.3882	6.2424	3.3281	1.6457	1.6322	0.8191
1033	ENSG00000122786	CALD1	4.1439	3.7657	7.0651	7.8362	7.2707	9.4863
1034	ENSG00000174669	SLC29A2	6.0114	6.0937	2.7614	1.5337	0.9017	2.7909
1035	ENSG00000235587	GAPDHP65	0	0	0	3.0355	0	5.1467
1036	ENSG00000083444	PLOD1	4.0916	4.5444	8.7926	9.4342	6.7412	7.938
1037	ENSG00000145632	PLK2	3.1749	2.1446	2.4963	4.9937	7.7521	6.0527
1038	ENSG00000166130	IKBIP	0.9686	0.7672	4.3799	5.3132	5.1444	5.5201
1039	ENSG00000273607	CHCHD10	9.8407	10.1965	6.9913	4.8832	5.8147	6.067
1040	ENSG00000152377	SPOCK1	2.4142	3.361	6.0479	5.9353	4.7993	0.376
1041	ENSG00000182158	CREB3L2	1.4508	1.3878	5.2405	5.8898	5.4512	6.0667
1042	ENSG00000013810	TACC3	1.9788	1.8659	7.0499	5.8639	4.2334	6.1451
1043	ENSG00000155254	MARVELD1	2.5381	1.5889	7.0581	6.4624	5.6191	5.4661
1044	ENSG00000149428	HYOU1	2.0333	2.386	5.6649	6.4133	5.8668	7.3633
1045	ENSG00000163131	CTSS	0.9077	1.5525	0.8785	4.3996	5.4449	5.3528
1046	ENSG00000183571	PGPEP1L	4.3289	4.612	0	0.5303	0	0.3403
1047	ENSG00000204072	ARMCX7P ENSG00000204072	3.2556	0.8285	5.2409	0	3.751	0
1048	ENSG00000080986	NDC80	0.329	0.0665	4.7625	3.933	2.9182	5.1699
1049	ENSG00000184445	KNTC1	1.3761	0.5952	4.7282	3.4235	4.3696	6.5146
1050	ENSG00000144136	SLC20A1 ENSG00000144136	2.1243	2.532	7.2461	6.4046	6.2294	6.2282
1051	ENSG00000145358	DDIT4L	4.309	6.3115	0.1671	2.746	1.1273	3.1523
1052	ENSG00000136068	FLNB	3.8133	2.4021	6.5396	7.3607	6.2942	8.1604
1053	ENSG00000228284	HLA-DQA1	2.6794	3.3472	1.6842	0.6575	6.4709	0.5705
1054	ENSG00000179218	CALR	5.5087	6.0601	9.9898	10.3787	9.4688	10.1539
1055	ENSG00000198624	CCDC69	5.6471	6.3273	1.874	1.245	3.1286	1.4799
1056	ENSG00000169885	CALML6	3.8156	5.6381	2.43	0.186	0.5469	0.4682
1057	ENSG00000259318	HMGN1P1	0	1.8704	5.4356	2.959	0	0
1058	ENSG00000185008	ROBO2	0.0414	0	3.167	5.7796	1.6196	3.0262
1059	ENSG00000106078	COBL	4.5256	6.1468	0.107	1.7928	2.2188	1.6057
1060	ENSG00000166407	LMO1	4.5575	4.9546	0	0.1354	0.8789	1.6087
1061	ENSG00000206190	ATP10A	0.2538	0.3761	4.2365	4.3152	4.7546	4.8623
1062	ENSG00000017427	IGF1	0.5965	1.4196	1.6209	2.1246	6.7672	3.0089
1063	ENSG00000278817		6.7251	6.1542	2.8866	1.2104	2.327	3.2448
1064	ENSG00000284603		0	0	5.1591	2.867	0	0
1065	ENSG00000237172	B3GNT9	0.7483	0.359	5.2786	5.4735	3.7635	3.6574
1066	ENSG00000178726	THBD	2.0485	2.5968	1.6607	0.631	6.8858	1.799
1067	ENSG00000082497	SERTAD4	0.2817	0.1021	3.0692	4.7944	2.9465	5.328
1068	ENSG00000110492	MDK	2.8257	1.583	6.6521	3.5751	7.1939	4.6731
1069	ENSG00000137745	MMP13	0	0	5.0738	4.0921	3.2774	3.9505
1070	ENSG00000197321	SVIL	8.0496	9.0614	4.124	3.8585	5.1712	4.63
1071	ENSG00000144908	ALDH1L1	4.9899	6.288	1.5077	1.109	1.3215	2.1729
1072	ENSG00000198881	ASB12	4.1467	4.4585	0	0.1992	0	0.067
1073	ENSG00000145623	OSMR	0.8828	2.4149	5.5549	4.922	5.8955	1.5018
1074	ENSG00000157456	CCNB2	0	0.1509	4.041	3.8022	4.0052	5.0701
1075	ENSG00000141965	FEM1A	6.4933	7.4655	2.7563	2.6066	3.0105	2.7787
1076	ENSG00000089101	CFAP61	4.5993	4.4521	0	0.8659	0.4642	0
1077	ENSG00000174807	CD248 ENSG00000174807	2.5635	2.2443	4.9117	2.0674	7.7513	3.4419
1078	ENSG00000035862	TIMP2	4.0418	4.2621	8.5907	8.6783	8.53	7.2321
1079	ENSG00000137310	TCF19 ENSG00000137310	1.5576	0	5.0112	3.7625	0	0
1080	ENSG00000235696	C2	0.2296	1.2139	3.7522	0.819	5.6291	4.2426
1081	ENSG00000188488	SERPINA5	0.8099	2.1292	6.9249	4.7141	4.9176	3.2373
1082	ENSG00000165192	ASB11	3.3407	4.9875	0	0.0561	0	0.16
1083	ENSG00000185222	TCEAL9	2.9008	2.3039	6.3438	6.9996	7.5085	5.8
1084	ENSG00000143369	ECM1	2.5171	1.58	5.7571	3.2739	7.1213	2.3474
1085	ENSG00000273707	CDKN1C	4.1862	5.395	0.0002	1.4	4.3078	1.0363
1086	ENSG00000163191	S100A11	4.8179	4.8573	9.3181	7.8488	9.7514	8.5599
1087	ENSG00000118257	NRP2	1.8077	0.4848	4.6711	4.9036	6.1253	5.0043
1088	ENSG00000101104	PABPC1L	1.646	1.3729	5.9964	5.0716	4.59	6.4643
1089	ENSG00000132386	SERPINF1	7.3704	8.7077	8.0533	5.3528	10.4836	4.5833
1090	ENSG00000230395	ANAPC1P3	3.3761	0	1.5759	3.1813	6.396	4.0322
1091	ENSG00000087077	TRIP6	3.0786	2.287	7.5503	6.1584	5.9238	7.1794
1092	ENSG00000153446	C16orf89	1.2401	1.0506	1.031	0.0681	2.8103	6.1128
1093	ENSG00000258284	POLR2KP1	0	4.1424	4.6345	0	0	2.4884
1094	ENSG00000284874		1.1833	0.9255	5.7754	4.2235	3.7209	5.9556
1095	ENSG00000224774	CSNK2B	1.9549	6.4893	4.6086	2.96	6.9967	6.9697
1096	ENSG00000186335	SLC36A2	4.694	4.7025	0.3936	0.2501	0.1486	2.2636
1097	ENSG00000205678	TECRL	4.902	4.0756	0.3661	0.4034	0.1797	0.2919
1098	ENSG00000170801	HTRA3	4.2773	3.5864	5.5436	4.2722	8.0669	1.5145
1099	ENSG00000152785	BMP3	0	0	2.1151	5.3648	0	0.1272
1100	ENSG00000177225	GATD1	3.6318	4.1533	9.1558	6.755	3.685	5.8032
1101	ENSG00000166816	LDHD	6.0247	5.7759	2.9742	2.5881	1.5866	0.7507
1102	ENSG00000006042	TMEM98	1.434	1.6979	4.925	6.9068	5.5238	4.4622
1103	ENSG00000174429	ABRA	4.1076	4.4738	0	0	0.2798	0.1111
1104	ENSG00000283890		0	3.5814	5.4597	2.6959	0	3.5441
1105	ENSG00000177732	SOX12	0.6104	1.522	5.6285	4.3461	2.7583	5.8438
1106	ENSG00000112096	SOD2	6.9729	8.4135	4.7463	6.4857	10.6782	5.3469
1107	ENSG00000169750	RAC3	1.5203	0.6358	5.4976	5.8187	2.2358	4.2751
1108	ENSG00000186628	FSD2	4.4776	4.8875	0.9732	0.2522	0.1514	0.7641
1109	ENSG00000125968	ID1	4.8565	2.706	7.6019	7.7811	5.7135	8.3856
1110	ENSG00000105989	WNT2	0	0	0.1735	0.3933	5.4723	2.0876
1111	ENSG00000284964		0	0	0	3.4982	0	4.753
1112	ENSG00000049323	LTBP1	2.9989	2.5403	6.6592	7.8941	4.6801	3.3354
1113	ENSG00000153815	CMIP	1.7286	1.8187	6.5583	4.2714	6.6279	3.7058
1114	ENSG00000265646	TUFMP1	0	0	3.0992	4.9639	0	0
1115	ENSG00000168065	SLC22A11	0	0	4.615	4.9815	1.944	1.888
1116	ENSG00000118971	CCND2	0.5622	0.3374	1.9524	0.4598	3.2103	5.8403
1117	ENSG00000230118		0	0	0	2.114	0	5.2998
1118	ENSG00000278763	FAM27B	1.928	0	6.4547	3.7694	3.1662	2.1427
1119	ENSG00000224834	BTF3P9 ENSG00000224834	0	0	0	3.2911	0	4.8612
1120	ENSG00000144857	BOC	1.8691	2.2839	6.9385	6.4145	5.4588	5.701
1121	ENSG00000256843	ENSG00000256843	0	0	0	0	0	5.2917
1122	ENSG00000131873	CHSY1 ENSG00000131873	1.3549	1.7078	5.7366	5.3362	6.1888	5.4118
1123	ENSG00000099957	P2RX6	5.6521	5.419	4.0866	0.9484	0.7343	2.5249
1124	ENSG00000230384	RPSAP25	0	0	0	1.6309	0	5.3689
1125	ENSG00000230391	RPSAP23 ENSG00000230391	0	0	0	1.6309	0	5.3689
1126	ENSG00000105711	SCN1B	7.3687	8.5441	4.5237	2.7536	4.1486	4.9286
1127	ENSG00000100479	POLE2	0.9346	1.2966	6.78	4.1961	2.3838	3.4825
1128	ENSG00000167578	RAB4B	3.0861	3.0906	8.2733	6.2031	5.1073	7.3263
1129	ENSG00000128595	CALU	4.3382	4.1725	7.128	8.2987	8.158	9.2835
1130	ENSG00000108106	UBE2S	3.2841	3.7761	7.4534	6.9932	5.9788	8.8013
1131	ENSG00000111186	WNT5B	0.7695	0.3127	6.1473	2.6491	3.9269	2.0378
1132	ENSG00000044574	HSPA5	4.1908	4.7513	7.5632	8.8806	9.1229	8.4347
1133	ENSG00000170312	CDK1	0.5359	0.0927	4.1902	4.8261	2.4485	4.9405
1134	ENSG00000196428	TSC22D2	1.9999	2.6624	4.9446	6.7181	6.776	6.6196
1135	ENSG00000240210		0	0	0	1.7104	0	5.3418
1136	ENSG00000243649	CFB	0.7187	0.7585	2.9895	1.4824	6.4001	1.7261
1137	ENSG00000137509	PRCP	2.2602	2.5066	5.1774	7.6194	5.932	6.2915
1138	ENSG00000160991	ORAI2	0.9512	0.7558	5.7226	4.6235	3.2936	5.2027
1139	ENSG00000092096	SLC22A17	1.8381	1.9964	6.6803	6.5788	4.4499	5.3404
1140	ENSG00000229638	RPL4P4	0	0	0	2.0127	0	5.2884
1141	ENSG00000088826	SMOX	1.4747	1.8553	5.4407	5.0353	6.9602	3.5123
1142	ENSG00000276504	TFPT	3.1043	0	5.7298	4.6441	4.783	5.5086
1143	ENSG00000076554	TPD52	1.7046	2.7288	5.4148	5.5211	1.2737	6.1605
1144	ENSG00000282432		0	0	0	4.0041	4.062	3.6687
1145	ENSG00000123416	TUBA1B	5.8257	5.3082	9.1589	9.1814	9.5041	10.5396
1146	ENSG00000124743	KLHL31	4.5479	4.0166	0.3148	0.1682	0.0551	0.0388
1147	ENSG00000170892	TSEN34	0.2296	1.3763	5.5609	4.5314	1.4423	4.2006
1148	ENSG00000187479	C11orf96	4.2028	4.4232	7.5619	7.5208	9.8879	6.7154
1149	ENSG00000164611	PTTG1 ENSG00000164611	0.7128	1.6577	4.7129	4.6306	5.4328	5.9654
1150	ENSG00000205177	C11orf91	0.7809	2.4773	0	3.4328	6.0807	2.8573
1151	ENSG00000135750	KCNK1	0	0.0669	3.4272	4.0136	4.8364	4.0871
1152	ENSG00000244306	DUXAP10	1.8974	1.2025	5.923	5.8407	3.7585	5.8992
1153	ENSG00000233608	TWIST2	0.4369	0.555	2.3625	0.1155	5.637	3.2313
1154	ENSG00000143797	MBOAT2	0.8402	0.6216	2.2776	3.7526	4.8843	5.8255
1155	ENSG00000095397	WHRN	0.431	0.1637	4.613	2.9677	5.2693	3.7843
1156	ENSG00000168930	TRIM49	0	0	0.3819	1.7832	0	5.3953
1157	ENSG00000162627	SNX7	1.0209	0.4498	4.545	4.5388	5.0538	5.1964
1158	ENSG00000079931	MOXD1	0.3203	0.6309	4.6726	5.5731	3.0441	3.8312
1159	ENSG00000162733	DDR2	1.2011	0.8564	4.1505	6.4719	4.2155	4.4364
1160	ENSG00000228672	PROB1	5.1313	5.4478	1.7974	1.0165	1.9466	0.4088
1161	ENSG00000148926	ADM	2.7152	3.1322	7.4181	6.559	7.0741	7.0462
1162	ENSG00000257905		0	0	5.3429	0	0	1.2803
1163	ENSG00000163435	ELF3	2.564	0	0	0.3223	4.855	3.9
1164	ENSG00000135916	ITM2C	3.3999	3.729	7.5142	8.5613	5.9078	7.4628
1165	ENSG00000168374	ARF4	4.0088	4.4551	6.8869	8.5339	8.3026	8.8751
1166	ENSG00000272196	H2AC19	3.9627	2.827	5.8117	8.6155	6.3094	7.3555
1167	ENSG00000181333	HEPHL1	0	0	0	0	0.03	5.2375
1168	ENSG00000267385		4.0975	4.1671	0	0	0	0
1169	ENSG00000109906	ZBTB16	4.5369	6.361	3.8654	0.9909	1.0836	2.1162
1170	ENSG00000163132	MSX1	0.789	1.1595	5.0306	4.6294	5.9535	4.0874
1171	ENSG00000221955	SLC12A8	0.4708	1.1073	3.7189	3.6275	6.2955	4.1304
1172	ENSG00000107159	CA9	1.2548	1.0923	6.0797	4.3542	1.1532	4.1401
1173	ENSG00000033100	CHPF2	2.3709	2.2586	6.6303	6.426	5.6754	6.7707
1174	ENSG00000178401	DNAJC22	0.0328	0.0004	5.4697	3.3105	1.8493	3.3062
1175	ENSG00000141696	P3H4	2.6641	2.5181	7.4879	6.8189	5.2931	6.3047
1176	ENSG00000142192	APP	4.939	4.7747	8.6029	9.095	7.9342	9.6818
1177	ENSG00000236698	EIF1AXP1	0	0	3.8345	2.2091	0	4.7437
1178	ENSG00000170458	CD14	2.1735	2.6264	4.7135	4.5903	6.6087	0.6986
1179	ENSG00000268117	VN1R84P	0	0	5.4221	2.1902	0	1.2636
1180	ENSG00000164111	ANXA5	4.9138	5.2	8.546	9.9006	9.2275	8.5655
1181	ENSG00000158887	MPZ ENSG00000158887	1.0908	0.5639	0.1821	0.3206	1.2537	5.7904
1182	ENSG00000140511	HAPLN3 ENSG00000140511	2.0379	1.9788	6.3891	5.534	6.2277	6.1995
1183	ENSG00000159251	ACTC1	4.7442	4.6912	0	1.1664	0.3613	1.3222
1184	ENSG00000181449	SOX2	0.0514	0.1114	3.4152	3.4944	0.2505	4.8176
1185	ENSG00000108829	LRRC59	2.4946	3.2388	6.4359	6.9759	7.1001	7.1932
1186	ENSG00000187595	ZNF385C	1.9695	1.9673	5.8351	4.7922	3.6936	7.2604
1187	ENSG00000170667	RASA4B	6.6437	7.1309	4.0477	1.3623	3.7712	3.8053
1188	ENSG00000166147	FBN1	3.1147	3.4553	7.1616	5.3558	8.5013	6.5584
1189	ENSG00000163399	ATP1A1	3.4793	3.7022	7.0679	7.9147	7.7665	7.8798
1190	ENSG00000082684	SEMA5B	0.3255	0.2748	0.3764	0.3744	2.858	5.4139
1191	ENSG00000244274	DBNDD2	6.5906	7.5594	3.1293	2.4504	4.9181	2.9049
1192	ENSG00000152977	ZIC1	3.3409	1.9032	6.1137	6.456	1.3014	3.7008
1193	ENSG00000183853	KIRREL1	1.5072	1.2207	5.0737	5.2253	5.3963	5.9881
1194	ENSG00000110077	MS4A6A	1.8889	2.4143	1.12	0.2359	5.9238	0.2749
1195	ENSG00000284909		3.4902	0	2.7862	0.9731	0	5.252
1196	ENSG00000125798	FOXA2	0	0	4.4892	3.6848	0.2012	3.4696
1197	ENSG00000105825	TFPI2	1.2941	0.6536	0	0.3744	5.5522	0.1267
1198	ENSG00000182718	ANXA2	5.7074	5.779	9.8226	8.9855	10.4028	9.785
1199	ENSG00000142178	SIK1	1.5564	0.1904	4.043	2.236	5.7335	4.8275
1200	ENSG00000213178	RPL22P1	7.0615	7.0505	3.566	3.0007	6.9883	8.0611
1201	ENSG00000154415	PPP1R3A	3.7333	4.4298	0	0	0	0.0344
1202	ENSG00000155893	PXYLP1	1.2773	0.9796	6.0478	5.5404	4.1557	3.7982
1203	ENSG00000268903		0	2.1463	6.3552	2.4615	2.3198	3.8543
1204	ENSG00000278299	TBC1D3C	0	2.5892	0.8784	0	1.9793	5.5877
1205	ENSG00000229900	HSPD1P21	0	0	5.4494	1.4542	0	1.1793
1206	ENSG00000112769	LAMA4	2.2619	2.1344	5.8119	5.877	6.7449	6.4855
1207	ENSG00000103269	RHBDL1	0.8457	0.4978	4.346	1.9487	3.1787	5.9511
1208	ENSG00000120820	GLT8D2	1.7189	1.8798	5.4145	6.4078	5.9465	5.5583
1209	ENSG00000163584	RPL22L1	2.8431	3.0695	4.9137	6.7775	7.6291	7.1926
1210	ENSG00000183856	IQGAP3	0	0.0451	4.7024	2.8787	3.0375	4.674
1211	ENSG00000265972	TXNIP	9.7193	8.9586	4.5395	5.2806	5.5146	6.678
1212	ENSG00000153395	LPCAT1	2.0802	1.5523	5.6592	3.7342	4.8834	7.0188
1213	ENSG00000103253	HAGHL	0.8256	0.9459	5.4644	4.0381	3.173	5.612
1214	ENSG00000100979	PLTP	2.9357	3.6738	5.9751	5.1931	8.163	7.7355
1215	ENSG00000280114		0	0	3.5086	2.336	1.0056	5.2957
1216	ENSG00000112149	CD83	0.3997	0.6899	1.541	3.7463	5.9418	1.9337
1217	ENSG00000140931	CMTM3	2.3548	1.5493	5.8146	5.2187	6.329	6.3359
1218	ENSG00000110080	ST3GAL4	1.3208	2.1685	6.6381	4.9974	5.2272	5.7084
1219	ENSG00000127824	TUBA4A	6.8186	7.0333	3.476	3.0219	2.7209	2.4025
1220	ENSG00000135902	CHRND	4.451	3.7597	0	0	0	0.2002
1221	ENSG00000118503	TNFAIP3	1.5758	2.0577	1.9043	4.2175	7.1387	2.915
1222	ENSG00000101892	ATP1B4	4.5054	3.7281	0.0413	0.0916	0	0.1347
1223	ENSG00000278567	CCL3	0.6866	0.6864	1.4398	0.2004	5.7212	0.3526
1224	ENSG00000163754	GYG1	6.6355	8.0786	3.4	3.1046	4.0361	3.1786
1225	ENSG00000237550		1.846	0.5417	1.383	2.6438	3.1183	6.5511
1226	ENSG00000143196	DPT	4.1446	4.2415	7.0897	5.569	9.441	4.3931
1227	ENSG00000172137	CALB2	0.3681	0.4871	0.2313	0	5.5135	1.2568
1228	ENSG00000285257		0	1.9872	5.4078	3.6436	0	2.0926
1229	ENSG00000164761	TNFRSF11B	0.1824	0.0596	4.0854	5.2146	3.0337	3.3661
1230	ENSG00000142675	CNKSR1	6.3031	6.246	1.6175	1.8814	2.8514	4.5526
1231	ENSG00000203819		0.9635	0	4.4859	5.0045	2.7639	4.6264
1232	ENSG00000111012	CYP27B1	0.4204	0.1132	2.8518	3.2964	3.8151	5.6254
1233	ENSG00000170962	PDGFD	0.8197	1.0239	2.8665	6.0652	4.6888	1.9086
1234	ENSG00000225712	ATP5MC2P1	0	0	0	2.6692	0	4.9632
1235	ENSG00000234017		0	0	0	2.6493	0	4.9699
1236	ENSG00000166292	TMEM100	0.8009	2.7608	3.9812	5.4898	5.0883	6.6387
1237	ENSG00000125810	CD93	2.8846	2.984	0.9318	0.0499	5.4083	0.0657
1238	ENSG00000152767	FARP1	1.5656	2.1639	6.7929	4.834	5.6385	5.6501
1239	ENSG00000006453	BAIAP2L1	1.369	0.9577	4.0745	5.3205	3.9625	6.2022
1240	ENSG00000186469	GNG2	1.2381	0.8319	5.0622	6.0436	3.7633	4.4031
1241	ENSG00000132205	EMILIN2	0.9804	1.104	4.5131	4.1339	5.3989	5.7369
1242	ENSG00000158571	PFKFB1	3.9887	4.7982	0.4375	0.3284	0.1346	0.5879
1243	ENSG00000110328	GALNT18	1.7676	1.9785	6.3813	6.6223	3.6012	4.6073
1244	ENSG00000142583	SLC2A5	4.9863	5.3892	1.3984	0.8054	2.9864	0.659
1245	ENSG00000018408	WWTR1	1.9749	2.5694	5.8721	7.4458	5.7402	4.5269
1246	ENSG00000147573	TRIM55	3.9148	4.332	0	0	0	0.3235
1247	ENSG00000136542	GALNT5	0.02	0	4.1094	5.1012	2.779	2.8439
1248	ENSG00000150712	MTMR12	1.6594	1.7339	5.5504	6.7114	3.916	5.2963
1249	ENSG00000141744	PNMT	4.9614	3.747	0.4335	0	0.1475	1.2388
1250	ENSG00000104415	CCN4	0.2272	0.0777	4.0249	2.9135	4.9002	4.2115
1251	ENSG00000138669	PRKG2	0.0825	0	3.187	5.2531	0.4341	1.8611
1252	ENSG00000169604	ANTXR1	2.1079	1.998	6.5712	6.2326	6.139	4.5383
1253	ENSG00000175906	ARL4D	0.9714	0.7909	4.0861	5.14	5.1733	5.0282
1254	ENSG00000162944	RFTN2	0.5718	0.4239	3.3891	5.3408	2.4518	4.8898
1255	ENSG00000158560	DYNC1I1	1.4348	1.2705	5.1649	5.7709	1.2968	4.1647
1256	ENSG00000158747	NBL1	3.7572	3.9103	6.6608	3.5754	8.8637	5.4905
1257	ENSG00000198121	LPAR1	0.7278	1.2381	4.5754	5.9592	4.8082	3.7743
1258	ENSG00000214124	SNRPEP9	0	0	5.113	0	0	0
1259	ENSG00000153071	DAB2	1.889	2.0108	5.4106	6.3599	6.5256	5.1026
1260	ENSG00000196811	CHRNG ENSG00000196811	4.3129	4.112	0.6993	0.0934	0	0.0352
1261	ENSG00000146809	ASB15	4.0221	4.1966	0	0	0.1909	0.1124
1262	ENSG00000186866	POFUT2	3.9688	2.3834	6.9206	7.2786	6.1841	7.576
1263	ENSG00000166250	CLMP	1.6334	1.6369	5.948	6.4097	4.9308	4.5084
1264	ENSG00000165474	GJB2	0	0.0628	2.0924	3.7993	4.6912	0.0686
1265	ENSG00000198768	APCDD1L	0.6891	0.3371	5.9656	1.3264	2.9841	1.5664
1266	ENSG00000167749	KLK4	5.011	4.7929	1.964	0.7659	0.7554	0.4909
1267	ENSG00000143434	SEMA6C	7.2884	7.1263	4.4235	3.0691	2.2558	4.0742
1268	ENSG00000205710	C17orf107	0.2906	0	4.6218	4.834	2.0065	3.1018
1269	ENSG00000105427	CNFN	0.3645	0	2.9242	2.8716	3.0577	5.7
1270	ENSG00000258608	DNAJC19P9	0	0	0	2.65	0	4.9154
1271	ENSG00000125538	IL1B	0	0	0.7077	0	5.1895	0
1272	ENSG00000134057	CCNB1	0.6826	1.2736	5.0985	4.4766	3.6388	5.7815
1273	ENSG00000205212	CCDC144NL	0.0457	0	4.3701	4.4298	1.9713	3.8637
1274	ENSG00000129195	PIMREG	0	0	4.6819	3.4643	2.874	4.3141
1275	ENSG00000106565	TMEM176B	2.9135	2.7401	0.5335	0.3185	5.8727	1.1921
1276	ENSG00000168234	TTC39C	0.8847	1.393	4.4306	3.1321	3.8692	6.5451
1277	ENSG00000079462	PAFAH1B3	2.0773	2.2669	6.0296	5.2412	2.8295	6.8538
1278	ENSG00000269378	ITGB1P1	2.1241	2.1547	2.1675	4.0923	0.6165	6.5438
1279	ENSG00000215845	TSTD1	4.9693	3.923	3.3402	3.4753	0	0.12
1280	ENSG00000111664	GNB3	1.0218	0.6741	4.8789	2.6108	3.2632	5.919
1281	ENSG00000231965		0	0	0	1.7808	0	5.1354
1282	ENSG00000122642	FKBP9	3.7848	3.9328	7.8287	8.3751	6.727	8.0135
1283	ENSG00000091136	LAMB1	3.0491	3.1613	6.5584	5.1836	7.1772	7.9614
1284	ENSG00000160209	PDXK	2.8998	2.8824	7.068	5.3619	6.5235	7.6204
1285	ENSG00000229886		0	0	5.1878	0	0	1.194
1286	ENSG00000242252	BGLAP	2.0349	1.368	6.4961	2.6303	0.5838	3.3618
1287	ENSG00000146054	TRIM7	7.0679	6.6039	3.3544	1.857	3.0514	3.9371
1288	ENSG00000174348	PODN	3.5827	3.6063	3.3246	0.6385	6.9224	5.0114
1289	ENSG00000146243	IRAK1BP1	0.5509	0.1102	4.2585	5.3363	2.0678	3.3637
1290	ENSG00000124785	NRN1	3.1728	2.3329	6.1743	7.7526	3.9173	5.9835
1291	ENSG00000115419	GLS	2.8381	2.4719	6.4827	7.5434	6.1955	5.7534
1292	ENSG00000169299	PGM2	0.4926	0.9309	4.6965	5.5901	3.878	3.953
1293	ENSG00000281300	NXN	1.4631	0.8133	3.6882	0	3.7694	5.3705
1294	ENSG00000152642	GPD1L ENSG00000152642	5.9639	6.1734	2.3874	2.7142	1.7259	1.7037
1295	ENSG00000215914	MMP23A	0	0	0	2.6293	4.8901	0
1296	ENSG00000272710		2.0328	0	4.7516	2.2489	2.3716	5.74
1297	ENSG00000143171	RXRG	4.2778	4.7124	0.518	0.0601	0.4891	1.204
1298	ENSG00000165617	DACT1	1.2829	1.4561	5.6608	5.9967	4.492	4.7147
1299	ENSG00000159335	PTMS ENSG00000159335	6.0867	5.6484	10.7989	8.4861	8.5598	10.0405
1300	ENSG00000196924	FLNA	6.3558	5.0914	9.6442	7.7783	9.2464	10.4237
1301	ENSG00000138119	MYOF	1.2485	1.6918	5.7072	4.799	6.2034	3.8477
1302	ENSG00000277354	CRIM1	0	0	0	0	0	5.0531
1303	ENSG00000117724	CENPF	0.0351	0.1554	4.2211	2.948	2.8986	5.0281
1304	ENSG00000171314	PGAM1 ENSG00000171314	4.2152	3.8847	8.2019	8.4333	7.5946	7.7519
1305	ENSG00000005448	WDR54	1.1151	0.5966	5.0859	4.5889	4.3999	5.118
1306	ENSG00000204128	C2orf72	0.5668	0	4.2001	4.9891	1.0047	2.9506
1307	ENSG00000162595	DIRAS3	0.6756	0.6662	3.0218	5.2869	3.9402	0.3576
1308	ENSG00000186654	PRR5	0.8641	1.2655	5.8913	4.6654	4.8001	4.2724
1309	ENSG00000174437	ATP2A2	10.0834	11.2722	6.1157	6.4751	7.4188	7.6594
1310	ENSG00000124374	PAIP2B	4.7631	4.5277	0.4319	1.3157	0.5117	0.5738
1311	ENSG00000119632	IFI27L2	2.9701	2.5887	7.2406	6.9687	6.4653	4.4583
1312	ENSG00000276043	UHRF1	0.8962	0.2499	4.8365	3.6426	2.906	5.3251
1313	ENSG00000148773	MKI67	0	0.0117	4.7534	2.8343	2.3814	4.3935
1314	ENSG00000267482		0	0	3.4129	4.6252	0	2.7269
1315	ENSG00000240163		0	0	1.3668	4.4732	4.2694	0.6833
1316	ENSG00000204469	PRRC2A	0	2.2047	0	0	4.6982	3.5022
1317	ENSG00000196562	SULF2 ENSG00000196562	2.3354	3.0074	5.6207	3.6124	7.9842	4.7735
1318	ENSG00000130513	GDF15	0.1186	0.5593	5.3458	1.909	4.2245	3.0381
1319	ENSG00000156970	BUB1B	0	0	4.1383	2.8629	2.8666	4.8857
1320	ENSG00000130940	CASZ1	4.533	4.4854	0.3525	0.0565	1.3856	0.6999
1321	ENSG00000137203	TFAP2A	0.3194	0	4.9372	4.3844	1.5709	1.937
1322	ENSG00000236271	FLOT1	4.1712	2.1663	6.2456	4.9432	6.0564	8.2003
1323	ENSG00000160392	C19orf47 ENSG00000160392	7.1734	7.575	5.1725	3.4746	2.3333	4.4687
1324	ENSG00000007237	GAS7	1.3249	2.055	5.763	5.2194	6.0077	5.4408
1325	ENSG00000197837	H4-16	0.4736	0.2179	4.4667	5.0907	1.6605	3.2052
1326	ENSG00000156011	PSD3	0.3238	0.1528	4.1032	5.3122	3.1465	2.6707
1327	ENSG00000223505	RPL35AP5	0	0	5.084	1.614	2.7267	0
1328	ENSG00000235377		0	0	0	2.1183	0	5.0046
1329	ENSG00000100219	XBP1	3.3016	4.3702	5.6701	7.6898	8.1179	7.9741
1330	ENSG00000145217	SLC26A1	3.3902	1.7851	6.402	3.9819	1.2266	1.0699
1331	ENSG00000042062	RIPOR3	3.8175	3.3612	1.0833	0.7598	3.5384	6.3755
1332	ENSG00000151135	TMEM263	2.3806	2.5642	5.3967	6.735	5.6888	7.143
1333	ENSG00000050165	DKK3	2.6543	2.4757	7.3127	5.8325	6.7209	4.5776
1334	ENSG00000233839		0	0	0	1.8865	0	5.0477
1335	ENSG00000267060	PTGES3L	5.3759	5.708	2.8316	1.7689	0.5494	2.2663
1336	ENSG00000162772	ATF3	2.5595	2.2586	5.0153	5.4955	6.5409	7.2495
1337	ENSG00000128422	KRT17	0	0	4.033	4.8938	2.2165	3.1617
1338	ENSG00000151789	ZNF385D	0.4999	1.2009	3.7621	6.0161	4.0865	4.0471
1339	ENSG00000104881	PPP1R13L	2.6394	1.8882	6.6748	4.0838	5.3957	6.7442
1340	ENSG00000141753	IGFBP4	5.2409	5.5746	6.4516	3.5279	9.6421	7.0009
1341	ENSG00000011052	NME1-NME2 ENSG00000011052	0	1.2557	4.4317	3.9677	3.309	5.4279
1342	ENSG00000100842	EFS	1.8956	1.0193	6.3207	5.5576	3.1649	3.5956
1343	ENSG00000157890	MEGF11	0	0.0239	5.0634	3.072	1.6436	3.6659
1344	ENSG00000237418		0	0	5.0795	1.6483	0	0
1345	ENSG00000144560	VGLL4	3.2242	2.9238	7.0082	6.8034	6.2825	7.6702
1346	ENSG00000229132	EIF4A1P10	0	0	0	2.3679	0	4.9213
1347	ENSG00000186185	KIF18B	0.0321	0.0327	4.2764	3.5412	2.5317	4.6311
1348	ENSG00000132819	RBM38	6.1999	7.9473	3.3371	3.2928	2.6937	4.1011
1349	ENSG00000241418	MCRIP2P1	0	0	3.1281	5.1729	0.8898	1.0639
1350	ENSG00000120833	SOCS2	1.6415	1.7764	3.1488	3.9612	5.7509	6.6164
1351	ENSG00000162444	RBP7	3.4196	0.5416	0.2182	0.5006	4.7645	4.0228
1352	ENSG00000069535	MAOB	5.2598	5.973	5.383	2.274	2.7744	0.9357
1353	ENSG00000110076	NRXN2	0.9852	1.9627	5.8591	5.2825	3.0009	1.433
1354	ENSG00000090104	RGS1	0.1908	0.4316	2.7909	1.5113	5.7874	1.8225
1355	ENSG00000243289	AGAP13P	0	0	5.0095	0	0	0
1356	ENSG00000135047	CTSL	4.478	5.0583	5.5383	5.251	9.8834	4.5474
1357	ENSG00000266736	GTF2IP6	0	0	3.4746	4.3682	0	0
1358	ENSG00000173110	HSPA6	0.4387	0.5698	1.3484	1.7315	5.7994	3.3131
1359	ENSG00000153406	NMRAL1	1.8314	1.5847	6.7562	5.6323	3.9251	3.6099
1360	ENSG00000115457	IGFBP2	3.8966	2.1025	5.5742	4.4223	6.6906	7.7899
1361	ENSG00000135185	TMEM243	1.2354	1.3837	4.8771	5.7995	4.0694	5.5948
1362	ENSG00000135218	CD36	7.1548	6.3331	1.9147	2.7492	5.2027	5.3176
1363	ENSG00000146670	CDCA5	0.2761	0.9118	4.4761	3.8043	2.629	5.4778
1364	ENSG00000175591	P2RY2	4.2658	4.4834	0	0.269	1.0728	0.5927
1365	ENSG00000283787	PRR33	3.4236	3.0464	6.3386	4.1363	0.6402	1.3271
1366	ENSG00000282416		1.4013	0	5.3964	3.3187	2.7098	4.8378
1367	ENSG00000187715	KBTBD12	3.6107	4.3327	0	0.1029	0	0.0725
1368	ENSG00000103888	CEMIP	0.2635	0.109	4.319	4.3152	4.1124	3.7156
1369	ENSG00000169239	CA5B	0.7263	0.3974	5.5896	4.09	2.6604	1.4222
1370	ENSG00000187984	ANKRD19P	1.021	0.4694	0.8185	0.2107	3.6686	5.1917
1371	ENSG00000213553	RPLP0P6	0.3508	0.9346	0.3879	2.0648	0	5.4185
1372	ENSG00000254483	SUGT1P4	0	0	0	3.0095	4.9306	1.7945
1373	ENSG00000011465	DCN	7.0858	7.3783	9.9094	11.4892	11.5448	7.8729
1374	ENSG00000205583	STAG3L1	1.8327	2.2128	6.7308	5.2207	3.536	6.0363
1375	ENSG00000213145	CRIP1	5.8689	4.528	8.6492	5.3234	9.5587	8.1494
1376	ENSG00000172828	CES3	5.1737	4.7377	1.9082	0.9288	0.2593	1.6033
1377	ENSG00000138685	FGF2	0.4833	0.3129	3.8936	5.0871	4.156	1.7223
1378	ENSG00000254193		0	4.9912	0	0	0	0
1379	ENSG00000172986	GXYLT2	0.116	0.2012	4.7278	4.0413	4.0895	2.7684
1380	ENSG00000144331	ZNF385B	3.3277	2.7554	6.1639	7.2199	2.7402	6.3656
1381	ENSG00000189144	ZNF573	0.312	0.4127	4.9559	4.4054	1.1672	1.494
1382	ENSG00000211455	STK38L	1.4385	1.3854	5.226	4.4713	5.6745	5.6769
1383	ENSG00000116194	ANGPTL1	3.445	3.8535	0.3065	0.5703	5.1522	0.9133
1384	ENSG00000134910	STT3A ENSG00000134910	3.6243	3.5678	6.7578	8.066	5.7962	8.0632
1385	ENSG00000129250	KIF1C	7.9262	8.9304	6.3689	3.5406	5.0792	4.8074
1386	ENSG00000114268	PFKFB4	1.2544	2.0426	5.8479	3.8026	3.5687	6.4207
1387	ENSG00000242358	RPS21P4	0	0	3.9852	3.8884	0	0
1388	ENSG00000215457	RPS8P3	0	0	0	1.6583	0	5.0389
1389	ENSG00000227402	SLC39A7	3.7796	3.8968	7.688	8.0924	7.1092	7.9834
1390	ENSG00000228891	DDX39BP1	0	0	5.0522	1.5361	0	0
1391	ENSG00000080573	COL5A3	4.5955	3.4386	7.1695	1.5222	5.7328	2.9428
1392	ENSG00000185070	FLRT2	4.6674	1.9774	6.5946	7.0468	4.5332	7.2746
1393	ENSG00000213519		4.774	3.0442	0	0	0	2.5337
1394	ENSG00000116039	ATP6V1B1	0.312	0.8622	5.6341	3.3632	1.5468	3.8098
1395	ENSG00000122644	ARL4A	1.1	0.3781	1.3442	3.2756	5.4989	4.3343
1396	ENSG00000167553	TUBA1C	3.9985	4.0063	7.4237	7.5525	8.3912	8.1234
1397	ENSG00000155659	VSIG4	1.1043	1.867	1.804	0	5.4988	0
1398	ENSG00000130222	GADD45G	5.9379	6.0695	4.0429	1.0322	6.4361	4.1154
1399	ENSG00000205403	CFI	1.7526	1.8922	0.938	0.3909	5.7733	0.3634
1400	ENSG00000165269	AQP7	6.897	5.4667	3.5467	1.5182	2.0793	4.0665
1401	ENSG00000259316		0	0.2566	4.2909	4.1197	0	2.1463
1402	ENSG00000110881	ASIC1	0.189	0.2395	4.885	4.1862	2.5718	3.8045
1403	ENSG00000273628		0.8867	0	4.8579	1.1608	0	3.662
1404	ENSG00000137193	PIM1	2.1451	2.0236	4.969	6.1779	6.8349	5.1128
1405	ENSG00000124140	SLC12A5	0.7124	0	0	1.1293	2.72	5.2263
1406	ENSG00000147381	MAGEA4	0	0	3.6195	4.1934	0	0
1407	ENSG00000121957	GPSM2	1.5103	3.1473	5.4635	6.519	3.8791	6.5683
1408	ENSG00000124102	PI3	0	0	0	0	4.9874	0.1974
1409	ENSG00000259195		0	0	4.6264	0	3.3238	2.445
1410	ENSG00000178999	AURKB	2.2924	1.0562	6.6234	4.0951	3.4466	5.3604
1411	ENSG00000279381		0	0	4.8835	2.2423	0	0
1412	ENSG00000261371	PECAM1	3.539	4.1774	3.7943	0.2068	5.7098	1.2575
1413	ENSG00000196436	NPIPB15	2.7573	0	4.8905	3.5498	0	3.5171
1414	ENSG00000254909		5.051	3.3987	5.6173	4.5392	0	3.0209
1415	ENSG00000114405	C3orf14 ENSG00000114405	0.6282	0.482	2.6423	4.2656	4.4935	5.1179
1416	ENSG00000234619	RPL7P11	0	0	0	1.1196	0	5.0444
1417	ENSG00000173276	ZBTB21	0.4726	0.3645	3.9707	5.008	4.4317	3.2178
1418	ENSG00000129226	CD68	2.2963	1.9767	6.2243	4.6795	6.6117	2.9007
1419	ENSG00000285186		0	0	4.9397	0	0	0
1420	ENSG00000236383	CCDC200	1.6914	2.3724	6.6727	4.4781	1.3472	3.9211
1421	ENSG00000065308	TRAM2 ENSG00000065308	1.1139	1.4175	5.1702	5.515	4.1678	5.3751
1422	ENSG00000049449	RCN1	3.4522	3.6499	6.9736	8.3676	7.2432	6.4623
1423	ENSG00000046604	DSG2	0.2625	0.185	3.8762	5.2296	2.8917	3.2292
1424	ENSG00000132530	XAF1	3.6006	2.4603	7.0178	3.939	2.7585	1.0289
1425	ENSG00000264343	NOTCH2NLA	1.1794	1.7614	5.5207	6.2438	4.2937	3.4735
1426	ENSG00000158050	DUSP2	1.9635	0.7587	2.0137	5.6393	4.8634	4.8757
1427	ENSG00000228247	UBBP2	0	0	0	1.8599	0	4.9552
1428	ENSG00000100162	CENPM	0.3454	0.9276	4.4723	3.1833	3.9907	5.4007
1429	ENSG00000198901	PRC1	1.0033	2.0036	5.1571	4.9597	4.0803	6.2554
1430	ENSG00000196154	S100A4	6.2257	5.5513	8.7121	6.5247	10.208	9.915
1431	ENSG00000224629		0	0	3.6223	4.1447	0	0
1432	ENSG00000126603	GLIS2	1.1091	0	4.3645	2.561	4.9222	4.4048
1433	ENSG00000105011	ASF1B	0	0	4.6682	3.5509	1.8764	3.8151
1434	ENSG00000153823	PID1	1.5273	1.9541	5.8007	6.4424	3.6414	4.7685
1435	ENSG00000218175		0	0.8591	0	2.7045	0	4.9138
1436	ENSG00000276180	H4C9	0.6291	0.4279	3.7904	5.6451	2.7629	3.6964
1437	ENSG00000103257	SLC7A5	2.3773	3.3212	4.9265	4.2386	7.1596	7.3104
1438	ENSG00000254478		0	0	4.9232	0	0	0
1439	ENSG00000124491	F13A1	1.1137	2.0563	5.5999	5.4502	5.7955	4.4951
1440	ENSG00000158859	ADAMTS4	0.483	2.7445	2.7207	1.8132	6.517	2.6386
1441	ENSG00000135063	FAM189A2	4.7517	4.9575	1.6974	0.247	0.7807	1.7892
1442	ENSG00000282379	DTX2	1.3314	1.1545	4.3701	0.8059	1.9553	5.719
1443	ENSG00000152556	PFKM	7.7805	9.7993	5.5804	6.1509	4.3031	5.1348
1444	ENSG00000268521	VN1R83P	0	0	4.7542	2.5326	0	0
1445	ENSG00000185686	PRAME	0	0	3.5577	4.1797	0	0
1446	ENSG00000064300	NGFR ENSG00000064300	0.7668	1.3512	1.8989	0.587	5.875	3.3096
1447	ENSG00000140682	TGFB1I1	2.9876	2.1069	7.3363	5.6547	5.4392	6.2786
1448	ENSG00000254866	DEFB109D	1.6735	0	4.0351	4.6814	2.9684	0
1449	ENSG00000223532	HLA-B	6.1136	4.8686	6.281	6.0163	8.508	2.4015
1450	ENSG00000274636	GLIS2	0.5488	0.6595	4.5993	2.9462	4.9871	4.4347
1451	ENSG00000101670	LIPG	0.1848	0.1347	3.5779	0.9135	2.5682	5.0514
1452	ENSG00000138316	ADAMTS14	0.0467	0	4.9455	0.7842	2.9396	0.399
1453	ENSG00000101096	NFATC2	0.6752	1.1984	4.1112	3.2832	6.0661	2.1619
1454	ENSG00000178162	FAR2P2	0.6015	0.1548	2.6527	2.7686	0.6297	5.4301
1455	ENSG00000143322	ABL2	0.9463	0.9917	5.152	2.6555	5.5147	2.1385
1456	ENSG00000162618	ADGRL4	2.6535	2.6204	0.1972	0.0329	4.9131	0
1457	ENSG00000060138	YBX3	10.7834	11.9096	6.9234	7.2334	9.1619	8.0624
1458	ENSG00000152127	MGAT5	0.8385	0.8358	4.3805	4.9288	4.0127	5.1836
1459	ENSG00000130595	TNNT3	10.7551	12.6973	13.0195	11.3337	7.6451	9.6883
1460	ENSG00000146592	CREB5 ENSG00000146592	3.0695	1.4233	1.7981	1.711	6.5659	1.4842
1461	ENSG00000176435	CLEC14A	3.8908	3.6248	0.7806	0.0534	4.1246	0
1462	ENSG00000164574	GALNT10	1.2086	1.8901	5.515	5.9491	4.8803	4.9167
1463	ENSG00000275746	KLF13	3.8142	0	3.837	3.2128	0	0
1464	ENSG00000188157	AGRN ENSG00000188157	2.2892	1.6544	5.2206	3.737	5.0955	6.9803
1465	ENSG00000161638	ITGA5	2.9887	3.3949	6.3052	5.0719	7.9997	6.9485
1466	ENSG00000179528	LBX2	0.5613	0.2932	4.6699	3.5618	2.3719	4.8928
1467	ENSG00000157168	NRG1	0	0	5.0052	3.601	2.067	1.4537
1468	ENSG00000272601		0	0	5.1757	3.0346	2.1301	3.0001
1469	ENSG00000267681	ENSG00000267681	0	0	4.7686	2.6281	2.7401	4.0076
1470	ENSG00000103241	FOXF1	0	0.1524	2.0101	1.0143	3.6451	4.9641
1471	ENSG00000122971	ACADS	6.1098	7.0101	3.7655	1.8661	2.6149	4.7668
1472	ENSG00000169085	VXN	5.6377	5.188	3.1321	3.7562	0.1479	2.4605
1473	ENSG00000070756	PABPC1	5.4845	5.99	8.5713	9.2356	9.4889	10.374
1474	ENSG00000142945	KIF2C	0.17	0.0965	5.0726	2.9418	1.6034	3.6733
1475	ENSG00000169508	GPR183	0.0792	0.2475	2.6831	0.5075	5.0753	0.4604
1476	ENSG00000198856	OSTC	3.0588	3.4163	5.7827	7.6835	7.1441	6.9727
1477	ENSG00000109321	AREG ENSG00000109321	0	0.1256	0	0	4.902	0
1478	ENSG00000254771		4.8389	2.1148	0	0	0	0
1479	ENSG00000176142	TMEM39A	2.0873	2.1678	5.3731	6.5698	4.9524	6.327
1480	ENSG00000184497	TMEM255B	2.6076	3.5603	0.6825	0.2373	5.3279	0.8405
1481	ENSG00000106367	AP1S1 ENSG00000106367	2.3072	1.6708	6.142	5.2886	4.999	6.3486
1482	ENSG00000163660	CCNL1	4.3735	4.6742	5.4237	9.2296	8.1488	7.2709
1483	ENSG00000148795	CYP17A1	3.2555	4.1601	3.9016	0.4686	0	0.1116
1484	ENSG00000228981		0.1841	0	1.6743	0.9474	0	5.1578
1485	ENSG00000241838		0	0	0	1.5997	0	4.9312
1486	ENSG00000204449	TRIM49C	0	0	0.8668	1.8139	0.2245	5.1437
1487	ENSG00000143333	RGS16	1.4112	1.0595	3.932	6.0624	4.9617	2.6806
1488	ENSG00000239264	TXNDC5	2.7944	3.6312	6.662	7.3487	7.3005	6.6034
1489	ENSG00000077942	FBLN1	3.8264	4.1481	6.1331	5.5669	9.1741	7.1428
1490	ENSG00000242209	RPL32P12	0	0	0	2.5905	0	4.6704
1491	ENSG00000233802	TRIM49D2	0	0	2.2248	2.185	0.5501	5.1813
1492	ENSG00000138136	LBX1	3.2048	4.3563	0	0	0	0
1493	ENSG00000067082	KLF6	2.8681	4.5141	6.2551	7.408	8.3764	5.5997
1494	ENSG00000177981	ASB8	6.4192	7.6427	3.93	4.8608	1.9585	4.364
1495	ENSG00000235588	AIF1	1.4491	2.9684	1.5962	1.9743	6.6516	3.9967
1496	ENSG00000172236	TPSAB1	1.9304	1.6907	0	0	5.1142	0.1208
1497	ENSG00000078596	ITM2A	3.8411	3.8421	6.7701	8.9843	6.7115	6.6779
1498	ENSG00000228454	C4B	0.88	1.6533	4.6313	3.2211	5.0025	5.9063
1499	ENSG00000114993	RTKN	3.0789	3.2547	7.4203	6.3581	6.0551	7.5263
1500	ENSG00000135476	ESPL1	0.0379	0.067	4.2059	2.5087	2.2958	4.7246
1501	ENSG00000126562	WNK4	0.1144	0.0355	3.8942	4.0003	1.8742	4.3424
1502	ENSG00000196118	CCDC189	0.0621	0	4.6316	3.5222	2.1341	3.8532
1503	ENSG00000095380	NANS	2.5889	2.6274	5.8804	6.1108	6.7606	6.7815
1504	ENSG00000139626	ITGB7	0.5585	0.5457	3.3207	3.7816	3.6722	5.5549
1505	ENSG00000182871	COL18A1	4.0461	3.9406	7.5001	3.5338	8.182	5.6423
1506	ENSG00000142046	TMEM91	1.7624	0.8691	6.2346	4.2545	4.4929	4.4037
1507	ENSG00000187260	WDR86	0.4414	0.5591	2.6616	3.9837	2.582	5.5798
1508	ENSG00000143502	SUSD4	1.0606	0.8175	2.3024	2.2894	4.3639	5.9134
1509	ENSG00000226472		1.6444	1.4435	2.7908	1.6331	2.4106	6.66
1510	ENSG00000116704	SLC35D1	1.6154	1.8931	4.1753	5.9264	2.6595	6.0889
1511	ENSG00000177096	PHETA2	1.2256	1.4775	5.3013	5.2274	3.5364	5.5939
1512	ENSG00000170419	VSTM2A	0	0	4.061	3.9587	0.4703	0.3179
1513	ENSG00000278134		1.0913	0	5.5793	3.0605	1.1733	1.6113
1514	ENSG00000281484	BTG3	0	0.6714	3.6799	5.0559	3.9718	2.5893
1515	ENSG00000241253	CFB	0.6878	0	3.3615	2.5575	5.3665	1.2489
1516	ENSG00000084110	HAL	0	0	0	2.422	0.0835	4.7313
1517	ENSG00000139926	FRMD6	0.8881	2.8219	4.9489	5.8675	5.8408	3.1611
1518	ENSG00000100373	UPK3A	3.9765	3.9398	0	0	0.6627	0
1519	ENSG00000176909	MAMSTR	5.8244	4.8508	4.3681	2.4367	0.3459	2.8166
1520	ENSG00000180318	ALX1	0	0	0	0	0	4.838
1521	ENSG00000165655	ZNF503	1.6316	0.8889	3.9643	4.4978	6.2834	3.9988
1522	ENSG00000125347	IRF1	2.9664	2.4204	3.429	6.9786	6.401	5.9639
1523	ENSG00000134802	SLC43A3	2.8608	3.0375	6.2896	7.302	5.9345	7.0643
1524	ENSG00000184254	ALDH1A3	2.1756	1.8959	1.658	2.2238	6.8132	3.8408
1525	ENSG00000197971	MBP	5.4564	6.3673	2.3017	1.2367	3.3698	4.9263
1526	ENSG00000198719	DLL1	2.674	1.704	0.8123	0.3492	5.1465	4.5855
1527	ENSG00000182195	LDOC1	1.5599	1.5837	5.8527	6.103	3.9345	3.8553
1528	ENSG00000151348	EXT2	2.5331	2.7893	6.4226	7.5333	4.3675	4.6024
1529	ENSG00000229156		1.7239	0	4.8426	2.345	3.0248	5.2616
1530	ENSG00000226788	RING1	0.4992	3.402	4.4527	0.0185	0.193	0
1531	ENSG00000134363	FST	2.4347	0.88	6.0799	4.1327	5.6923	3.3677
1532	ENSG00000216490	IFI30 ENSG00000216490	1.6817	2.0386	2.7333	1.4149	6.7612	2.5939
1533	ENSG00000168461	RAB31	1.1732	1.8583	4.1822	2.6356	5.9808	5.498
1534	ENSG00000254618	TMED10P1	0	0	0	2.3088	0	4.7294
1535	ENSG00000132481	TRIM47	3.399	3.1353	7.1869	6.0919	7.0802	7.5176
1536	ENSG00000284779		0.417	0	2.954	1.5481	1.5002	5.4017
1537	ENSG00000147536	GINS4	0.3586	0.0785	3.6497	2.7596	1.219	5.0573
1538	ENSG00000225210	DUXAP9	1.2356	1.617	5.532	5.3797	3.3252	5.3459
1539	ENSG00000223639	CLIC1	4.1012	3.7659	7.7982	6.6336	8.3072	7.6483
1540	ENSG00000138615	CILP	2.6164	3.1487	2.2242	1.0954	6.6487	4.6193
1541	ENSG00000224982	TMEM233	2.9992	4.7635	0	0	1.6035	0.0742
1542	ENSG00000127528	KLF2	4.8784	4.5003	7.5696	8.3795	7.6765	9.4511
1543	ENSG00000260549	MT1L	1.933	1.0249	4.5476	5.8397	5.0947	5.1895
1544	ENSG00000123999	INHA	0.7404	0.3751	3.6747	1.731	1.8339	5.5899
1545	ENSG00000111536	IL26	0	0	0	0	0.4787	4.8945
1546	ENSG00000121966	CXCR4	1.0996	1.1376	0	1.6078	4.8169	4.4342
1547	ENSG00000171766	GATM	4.0843	6.1827	0.3644	2.6652	2.1354	3.6695
1548	ENSG00000012660	ELOVL5	2.1456	1.5556	4.4365	4.6341	6.7813	5.3191
1549	ENSG00000177426	TGIF1	2.3829	3.9312	5.4794	7.0404	7.6364	6.0197
1550	ENSG00000163235	TGFA ENSG00000163235	0	0	2.5703	2.3517	2.8096	5.2229
1551	ENSG00000142694	EVA1B	3.7289	2.9752	8.1172	6.43	6.8025	6.361
1552	ENSG00000117525	F3	1.9573	1.6783	5.463	1.6995	4.9697	0.7098
1553	ENSG00000115221	ITGB6	4.0105	3.5984	0	0	0.0367	0
1554	ENSG00000236353	PBX2	3.9526	0	4.3098	3.2883	0	1.2505
1555	ENSG00000258839	MC1R	0.936	0.5402	3.9746	2.5008	4.1045	5.5604
1556	ENSG00000039560	RAI14	0.4248	0.5707	3.3162	3.2138	5.6768	2.9091
1557	ENSG00000224864		0	0	0	3.3285	0.5082	4.3779
1558	ENSG00000173846	PLK3	1.8438	1.9347	5.4702	4.3698	6.7282	4.9292
1559	ENSG00000129534	MIS18BP1	0.7721	0.7169	5.1152	4.7939	4.0771	3.6541
1560	ENSG00000104848	KCNA7	3.2761	4.5376	0.1728	0.2852	0.0915	0.2087
1561	ENSG00000253528		1.9217	0	4.9732	1.9844	0	0
1562	ENSG00000172458	IL17D	7.2877	7.4657	5.1437	6.8454	3.7797	2.8017
1563	ENSG00000227794	RPS18	3.1837	0.3262	5.1138	3.174	5.8719	4.4589
1564	ENSG00000003137	CYP26B1	1.7094	0.6895	4.4264	4.2607	4.7601	5.7641
1565	ENSG00000233406		0	0	0	1.7289	0.7665	4.9972
1566	ENSG00000122378	PRXL2A	4.1996	4.6877	1.2444	0.2082	3.334	0.4768
1567	ENSG00000197405	C5AR1	0.8753	0.612	4.0808	1.5236	5.0697	4.3069
1568	ENSG00000034510	TMSB10	8.2323	7.7877	11.1582	9.4536	12.3627	12.0233
1569	ENSG00000168268	NT5DC2	3.717	3.1544	7.9479	6.3938	6.4246	7.373
1570	ENSG00000116981	NT5C1A	2.7217	4.6072	0	0.2393	0	0
1571	ENSG00000197238	H4C11	1.4792	0	2.4214	5.2124	3.9	4.3612
1572	ENSG00000104312	RIPK2	0.7884	0.6869	3.0441	3.5061	5.7902	3.9275
1573	ENSG00000228532	SUMO2P21	0	0	0	2.8007	0	4.4875
1574	ENSG00000188001	TPRG1	0.8555	1.1911	3.7835	5.7762	1.7815	1.1409
1575	ENSG00000129749	CHRNA10	5.1648	4.6684	0.6077	1.6297	1.0783	1.5095
1576	ENSG00000104213	PDGFRL	2.2875	2.503	5.4001	6.6624	5.9061	2.7271
1577	ENSG00000196352	CD55	3.4624	4.8194	2.4159	4.5889	8.0653	3.5867
1578	ENSG00000134222	PSRC1	0.1668	0.529	4.9665	3.0723	2.676	4.3374
1579	ENSG00000175130	MARCKSL1	1.9136	1.9989	4.7723	5.7619	5.9719	6.0235
1580	ENSG00000161509	GRIN2C	0.6831	0.4758	2.308	0.9877	1.9569	5.7244
1581	ENSG00000163659	TIPARP	1.2365	2.3209	3.5841	5.8799	6.0654	4.7833
1582	ENSG00000214756	CSKMT	2.5934	1.1958	5.942	5.23	5.4724	5.5492
1583	ENSG00000160255	ITGB2	1.1604	1.383	5.1944	4.7473	5.1126	5.0859
1584	ENSG00000251285		0	0	0	2.6144	0	4.5556
1585	ENSG00000184347	SLIT3	1.3428	1.5786	5.3466	4.5533	5.8187	4.8379
1586	ENSG00000104369	JPH1	5.9222	6.7337	3.2221	4.5958	1.2749	4.6225
1587	ENSG00000243696		4.4953	4.7954	1.0099	0.4917	0.7051	1.5439
1588	ENSG00000140968	IRF8	0.2357	0.8153	0.1966	3.7196	3.7791	4.3003
1589	ENSG00000234704	BRD2	4.0582	0.5007	4.5398	6.2809	2.7977	4.3906
1590	ENSG00000179051	RCC2	1.9519	2.2042	5.0731	4.9311	5.7043	6.7955
1591	ENSG00000124212	PTGIS	1.3177	1.7267	4.9091	3.6021	6.0184	1.7048
1592	ENSG00000187210	GCNT1	0.2113	0.0973	3.8633	4.8622	2.2418	3.2063
1593	ENSG00000234651	BAG6	3.7965	0.5592	2.7868	4.2574	0	0
1594	ENSG00000111424	VDR	0.3255	0.4378	4.0786	2.8922	3.9454	4.8753
1595	ENSG00000130309	COLGALT1	3.3464	3.4055	6.9709	6.6473	6.581	7.9189
1596	ENSG00000249992	TMEM158	0.5051	0.6053	4.754	2.0782	4.9696	2.813
1597	ENSG00000232218		0	0	0	2.7289	2.3716	4.6639
1598	ENSG00000064205	CCN5	4.1748	4.3609	2.6601	0.8692	6.7143	4.1097
1599	ENSG00000167747	C19orf48	2.6289	2.455	6.628	5.7463	5.1973	6.8954
1600	ENSG00000155792	DEPTOR	4.3405	6.4029	2.0702	1.7281	2.4189	1.3512
1601	ENSG00000206258	TNXB	0	0.6727	0	1.3037	5.067	2.4939
1602	ENSG00000140332	TLE3	1.5669	2.3806	5.7704	5.5431	5.2794	6.0802
1603	ENSG00000240505	TNFRSF13B	4.4547	3.777	0.2344	0.2683	0.2439	0.8785
1604	ENSG00000253680		0	0	0	0	0	4.7588
1605	ENSG00000143228	NUF2	0	0	3.9306	2.75	3.5274	4.2987
1606	ENSG00000163874	ZC3H12A	2.1644	1.8077	3.9249	4.1855	7.2695	3.6931
1607	ENSG00000167157	PRRX2	0.6211	0.5942	4.9127	2.0665	4.891	2.7791
1608	ENSG00000013016	EHD3	0.6999	0.8888	4.731	5.283	1.8326	2.7915
1609	ENSG00000119408	NEK6	0.7198	1.7613	5.2532	4.9796	4.7969	4.657
1610	ENSG00000249915	PDCD6	4.3641	4.3069	8.2028	8.7632	5.8853	7.5186
1611	ENSG00000136295	TTYH3	1.6474	1.2061	5.8009	3.8657	5.0668	5.1494
1612	ENSG00000154930	ACSS1	5.4766	4.7261	1.5234	1.4141	1.7637	0.9439
1613	ENSG00000064547	LPAR2	0.822	0.942	4.7001	3.4026	3.1545	5.608
1614	ENSG00000129451	KLK10	0	0.1936	2.9874	1.6321	1.9355	5.2265
1615	ENSG00000141985	SH3GL1	3.1224	2.6713	7.2509	5.6801	6.4428	6.6702
1616	ENSG00000130522	JUND	5.8827	5.3444	10.0462	8.8391	9.4251	8.5699
1617	ENSG00000142949	PTPRF	1.2035	0.8756	5.3989	4.1701	2.6184	5.0081
1618	ENSG00000277494	GPIHBP1	4.389	3.2112	0	0	2.5377	0.0349
1619	ENSG00000151150	ANK3	4.4048	5.7949	2.0607	1.9115	1.052	1.1123
1620	ENSG00000161681	SHANK1	0.0564	0.2613	3.6878	0.7902	0.4495	4.4694
1621	ENSG00000107537	PHYH	7.2795	7.9339	3.7194	4.2234	3.9264	3.7182
1622	ENSG00000136999	CCN3	1.2025	0.1634	2.8968	2.3348	5.7553	3.4595
1623	ENSG00000166106	ADAMTS15	0.557	0.84	0	0.0199	4.7703	3.0069
1624	ENSG00000151632	AKR1C2	5.7762	6.7421	3.4351	2.1086	5.5432	2.4313
1625	ENSG00000166813	KIF7	0.8515	0.3509	5.3121	3.4533	3.6258	4.0782
1626	ENSG00000168468	ATF6B	2.3072	1.6883	4.9931	4.8643	3.4038	0
1627	ENSG00000279724		0	0	4.65	0	2.2303	0
1628	ENSG00000267692	TAF9P3	0	2.5355	4.4532	3.0549	0	3.9949
1629	ENSG00000134308	YWHAQ	4.4477	4.0456	7.5235	7.949	8.0058	8.3229
1630	ENSG00000257921		0	0.2713	4.9116	2.5241	0	1.5898
1631	ENSG00000196369	SRGAP2B	0.7062	0.4477	4.6503	4.488	3.0903	4.4011
1632	ENSG00000113583	C5orf15	3.0597	3.1434	5.9555	7.8821	5.94	6.5553
1633	ENSG00000092445	TYRO3 ENSG00000092445	1.0087	1.0417	5.3478	3.5383	3.8221	5.2427
1634	ENSG00000178809	TRIM73	0.8469	0.9984	4.3218	3.5234	2.7205	5.8094
1635	ENSG00000175264	CHST1	1.1238	0.9414	5.6526	4.1547	3.4943	4.7268
1636	ENSG00000236418	HLA-DQA1	1.4301	3.0964	1.0921	3.0525	0	5.4504
1637	ENSG00000070669	ASNS	1.4324	2.1585	3.0348	3.5849	4.1208	6.9542
1638	ENSG00000127083	OMD	0.1039	0.4986	3.8758	4.0273	3.5222	0.3204
1639	ENSG00000167702	KIFC2	2.96	1.6948	6.094	3.7922	3.8512	6.8272
1640	ENSG00000204394	VARS1 ENSG00000204394	0	3.5484	0	0	2.3953	4.1516
1641	ENSG00000110628	SLC22A18	0.7205	0	5.2645	3.4225	2.4693	1.4339
1642	ENSG00000173530	TNFRSF10D	0.3789	0.661	2.199	1.5753	5.2481	0
1643	ENSG00000109861	CTSC	1.5377	3.4703	4.0083	2.3071	5.9952	0.6059
1644	ENSG00000241130	RPL32P30	4.6902	2.0111	0	0	0	0
1645	ENSG00000242335	CFB	0.6113	0.6924	4.6454	3.0041	4.2154	0.4429
1646	ENSG00000174442	ZWILCH	0.9329	0.6553	5.4698	4.2724	3.0708	4.0383
1647	ENSG00000218582	GAPDHP63	0	0	0	2.5395	0	4.5144
1648	ENSG00000140465	CYP1A1	0	4.8044	0	0	1.2495	0
1649	ENSG00000228080	HLA-DRB1	4.4148	0	3.1745	0.0139	0.7255	0
1650	ENSG00000197380	DACT3	1.1819	0.8356	5.2888	3.8533	3.1448	5.2235
1651	ENSG00000072110	ACTN1	3.3351	3.4449	7.6053	6.5187	7.1613	6.9312
1652	ENSG00000237515	SHISA9	0.9909	0.4819	3.9544	5.6145	2.5659	3.5681
1653	ENSG00000113384	GOLPH3	2.9667	4.4947	7.8593	7.7211	5.8505	6.7925
1654	ENSG00000188517	COL25A1	0.0746	0	0.4252	0.2314	0.8156	4.9686
1655	ENSG00000253816	GUSBP14	1.4158	0.1295	4.159	4.3594	0	2.7417
1656	ENSG00000131188	PRR7	1.2737	0.6062	5.6052	4.0039	3.1169	4.4713
1657	ENSG00000099725	PRKY	0.1583	0.4482	0.0997	0.5366	4.9641	0.1361
1658	ENSG00000008300	CELSR3	0.1181	0.0756	1.2049	1.5311	2.7426	5.1699
1659	ENSG00000167680	SEMA6B	2.0602	2.5241	0.8239	0.0851	5.573	1.3715
1660	ENSG00000157111	TMEM171	0.5756	0.098	1.5327	4.4617	0.9001	4.3073
1661	ENSG00000151725	CENPU	0.3734	0.2476	4.5961	3.5683	3.0592	4.2967
1662	ENSG00000177425	PAWR	2.2907	1.3512	4.453	6.209	4.4315	5.8076
1663	ENSG00000072840	EVC	0.4579	1.3702	5.0373	5.1709	2.5336	2.3516
1664	ENSG00000159348	CYB5R1	8.0361	8.3872	4.293	4.7843	4.0197	5.2926
1665	ENSG00000166165	CKB	7.3212	5.4327	7.6892	5.0591	6.7278	10.407
1666	ENSG00000189221	MAOA	5.0049	3.4499	0	0.6493	1.1103	1.1484
1667	ENSG00000124762	CDKN1A	3.7731	5.4796	7.2742	7.1596	9.4641	6.1565
1668	ENSG00000157782	CABP1	2.2397	1.0935	1.8802	0.5246	0.385	5.5658
1669	ENSG00000172889	EGFL7 ENSG00000172889	5.8771	5.1046	4.4901	0.6749	5.6501	4.8972
1670	ENSG00000136240	KDELR2	3.375	4.5763	6.851	7.0766	7.407	8.467
1671	ENSG00000238104	PPP1R10	0	0	2.6442	4.304	0	3.1161
1672	ENSG00000173559	NABP1	0.9626	0.9568	4.6501	5.5789	2.2068	3.2045
1673	ENSG00000211833	TRAJ58	0	0	4.6907	0	0	0
1674	ENSG00000168994	PXDC1 ENSG00000168994	2.7191	3.8478	5.635	6.9711	7.7436	6.3103
1675	ENSG00000170004	CHD3	3.1983	2.4017	6.9855	5.48	5.9824	6.8212
1676	ENSG00000061656	SPAG4	0.5758	2.0535	5.1388	4.0903	4.4172	5.4735
1677	ENSG00000241282	RPL34P33	0	0	0	2.7819	0	4.3708
1678	ENSG00000144554	FANCD2	0.3395	0.0532	3.4833	2.3783	3.4479	4.9081
1679	ENSG00000229097	CALM2P2	1.1522	0.5354	4.8017	5.355	2.7967	2.8287
1680	ENSG00000253166		3.147	0	4.6366	0	3.3282	3.007
1681	ENSG00000101412	E2F1	0.9886	0.5691	5.1732	3.612	2.9738	4.801
1682	ENSG00000012171	SEMA3B	3.244	2.7683	6.6214	6.54	5.6009	7.3744
1683	ENSG00000166851	PLK1	1.29	0.9822	5.5952	3.1113	3.0883	5.1908
1684	ENSG00000158008	EXTL1	4.6307	3.2391	7.0127	6.8585	2.463	6.0572
1685	ENSG00000142089	IFITM3	6.0011	6.2976	8.1757	7.3887	9.8918	4.3732
1686	ENSG00000149564	ESAM	4.7	3.9084	0.7974	1.4371	5.7524	2.8238
1687	ENSG00000082397	EPB41L3	1.8839	1.5849	4.7788	4.6693	6.0299	5.6904
1688	ENSG00000184117	NIPSNAP1	1.7149	1.9308	5.6455	5.1212	5.5753	5.6602
1689	ENSG00000125845	BMP2	0.4525	0.7475	4.223	4.9004	4.2522	3.16
1690	ENSG00000096060	FKBP5	4.8316	6.9598	4.1725	1.0974	4.4346	3.4494
1691	ENSG00000180867	PDIA3P1	0.5623	0.4513	1.7935	2.7557	1.092	5.5121
1692	ENSG00000163931	TKT	2.8592	3.669	6.8178	5.9659	6.7824	7.5936
1693	ENSG00000145536	ADAMTS16	0.0249	0.0811	2.6658	1.1762	4.9187	0.5434
1694	ENSG00000165304	MELK	0.0673	0	3.887	2.8958	2.1676	4.5516
1695	ENSG00000224579		0	0	4.7705	0	0	1.0344
1696	ENSG00000239617	RPL32P27	0	0	3.5721	3.3818	3.6686	4.0522
1697	ENSG00000174059	CD34	4.5709	3.7501	1.3187	1.3421	6.2297	3.0577
1698	ENSG00000185215	TNFAIP2	4.6687	4.9037	5.8245	4.4225	9.5678	5.7119
1699	ENSG00000130755	GMFG	2.376	2.6693	1.9316	3.001	6.5831	5.5496
1700	ENSG00000197283	SYNGAP1	2.3916	0.9546	5.3983	4.9135	4.3059	5.8493
1701	ENSG00000257539	HSPA8P14	0	0	0	1.6861	0	4.7021
1702	ENSG00000114115	RBP1	2.9288	2.6116	1.0169	1.8683	4.1833	6.3959
1703	ENSG00000130429	ARPC1B	4.1631	4.1081	7.6327	6.4392	7.7267	8.5455
1704	ENSG00000270882	H4C14	2.0767	1.8969	4.3676	4.9839	0.0643	4.2844
1705	ENSG00000118849	RARRES1	1.6856	0.5119	0	1.1572	5.1674	0.3641
1706	ENSG00000270705		3.3234	2.427	5.7768	3.97	2.8137	0
1707	ENSG00000183255	PTTG1IP ENSG00000183255	4.5171	4.2495	7.8996	8.1987	7.6586	8.3754
1708	ENSG00000129991	TNNI3	4.6549	2.6822	0	0	0	1.5116
1709	ENSG00000184349	EFNA5	0.5323	0.3176	4.0845	4.5259	2.3264	4.2191
1710	ENSG00000164199	ADGRV1	0.1418	0.3601	3.5298	2.9026	2.7383	5.0784
1711	ENSG00000172071	EIF2AK3	0.6188	1.6193	3.9985	5.0727	4.9843	4.637
1712	ENSG00000271749		0	0	4.2884	2.1966	0	3.2718
1713	ENSG00000062524	LTK	0.2733	0	2.1779	0.433	2.4509	4.9754
1714	ENSG00000134716	CYP2J2	4.6465	3.2637	0.2698	0.6378	0	0.7395
1715	ENSG00000183691	NOG	2.1515	1.1366	3.4063	4.4951	1.5988	6.1016
1716	ENSG00000139514	SLC7A1	0.4684	0.402	3.3945	4.0657	4.5278	4.1869
1717	ENSG00000284215		2.0509	1.3651	5.089	0	2.4941	0
1718	ENSG00000220323	H2BC19P	0.0186	0.437	0	4.8093	2.1789	2.5998
1719	ENSG00000115363	EVA1A	1.1536	0.2609	4.5337	4.1352	3.6915	4.7363
1720	ENSG00000226437	TRIM39	0	2.6884	0	0	3.8485	3.627
1721	ENSG00000251550		0	0	0	0	3.2748	4.0126
1722	ENSG00000110693	SOX6 ENSG00000110693	1.643	2.9289	5.0894	6.3957	1.8205	4.3152
1723	ENSG00000020181	ADGRA2	2.1874	1.9944	5.3031	3.9908	4.9922	6.8658
1724	ENSG00000269981		1.2314	0	4.6414	2.0775	0	3.5376
1725	ENSG00000128791	TWSG1	1.63	1.2166	3.8635	5.5215	4.9894	5.2638
1726	ENSG00000112936	C7	0.7295	0.4471	0	0	4.9334	0.6404
1727	ENSG00000256043	CTSO	1.7792	1.7164	4.2533	5.5368	4.7164	1.0088
1728	ENSG00000278552		0	0	0	1.9594	0	4.6072
1729	ENSG00000232514		0	0	0	1.52	0	4.6877
1730	ENSG00000006606	CCL26	0	0	0	0	4.629	0
1731	ENSG00000105245	NUMBL	3.4051	2.0309	6.6296	5.6067	5.4737	6.8012
1732	ENSG00000159403	C1R	4.3008	5.0085	5.9173	4.4534	9.4241	5.7159
1733	ENSG00000175886	RPL7AP66	0	0	0	1.8381	0	4.6272
1734	ENSG00000147576	ADHFE1	5.6373	6.2333	4.5526	4.0425	0.8542	3.6744
1735	ENSG00000284490		0	0	5.0996	1.5038	2.3022	2.114
1736	ENSG00000132321	IQCA1	0.4414	0	4.0944	3.8936	1.065	0.1474
1737	ENSG00000168487	BMP1	3.2424	2.7762	7.3785	5.4357	6.6933	6.2421
1738	ENSG00000052126	PLEKHA5	0.849	0.5844	4.8159	4.3557	3.847	4.2366
1739	ENSG00000168079	SCARA5	2.9417	2.6593	0.7962	0.3795	5.6255	1.8238
1740	ENSG00000213626	LBH	3.4213	2.461	6.3042	6.8139	6.1267	6.7724
1741	ENSG00000271267		0	0	4.8747	1.4174	2.7938	2.7105
1742	ENSG00000085871	MGST2	5.2416	5.6324	1.8269	1.2164	5.0726	3.4383
1743	ENSG00000241132	LY6G5B	2.4125	0	4.4797	2.6481	0	0
1744	ENSG00000284947		0	0	0	2.8153	0	4.2566
1745	ENSG00000166002	SMCO4	2.1868	2.7407	6.1449	5.4471	5.2324	6.8552
1746	ENSG00000101187	SLCO4A1	1.6981	5.0719	1.2835	0	3.6836	1.0425
1747	ENSG00000177575	CD163	1.3977	2.0566	3.8496	1.51	5.667	0.6463
1748	ENSG00000119929	CUTC	7.2738	7.1437	3.0706	3.7178	4.3802	3.4843
1749	ENSG00000248439	RPL23AP94	0	0	0	0	3.0723	4.0971
1750	ENSG00000188760	TMEM198	0.69	0.4202	3.6073	3.1298	2.0717	5.3739
1751	ENSG00000152580	IGSF10	0.0753	0.5206	4.5189	4.105	1.0209	2.098
1752	ENSG00000118705	RPN2	4.6203	5.1187	7.3516	8.7187	7.6746	9.2275
1753	ENSG00000099251	HSD17B7P2	1.3948	0.6637	4.9358	3.2257	0.652	0.0751
1754	ENSG00000103994	ZNF106	6.7026	7.3173	3.9066	4.0832	2.8257	3.2076
1755	ENSG00000122756	CNTFR	4.1792	4.4613	2.1126	2.3229	1.0707	6.1605
1756	ENSG00000143924	EML4	1.0935	0.7195	4.3791	4.6685	4.379	4.6653
1757	ENSG00000141401	IMPA2	6.316	7.9677	3.4454	3.3497	3.7881	5.703
1758	ENSG00000115592	PRKAG3	3.7727	4.846	1.3252	0.9793	0.2959	0.6057
1759	ENSG00000011426	ANLN	0.3301	0.0698	3.6808	3.6016	3.5387	4.322
1760	ENSG00000168961	LGALS9	2.0069	1.9486	2.9207	0.2195	5.4018	0.5326
1761	ENSG00000171714	ANO5	3.9343	4.1559	0.5636	1.7204	0.1595	0
1762	ENSG00000269737		1.6247	0.2998	4.5336	4.0216	0.1272	1.2812
1763	ENSG00000144747	TMF1	1.3549	1.6254	5.5036	5.5838	4.2329	4.5527
1764	ENSG00000226618	PRRC2A	3.2261	0.4518	6.0246	4.6847	3.0209	3.0305
1765	ENSG00000148154	UGCG	1.112	2.0948	3.3782	4.9874	6.2085	2.9447
1766	ENSG00000136167	LCP1	0.7034	1.5761	1.2366	4.6241	4.258	4.7393
1767	ENSG00000050344	NFE2L3	2.62	0.7142	1.5496	5.8716	1.8775	3.9416
1768	ENSG00000184937	WT1	0	0.0624	0	0	4.5118	2.187
1769	ENSG00000150687	PRSS23	3.3558	4.2349	7.988	7.3342	7.2948	5.9853
1770	ENSG00000230777	RPS29P5	0	0	4.7929	1.5911	0	1.7068
1771	ENSG00000183072	NKX2-5	0.4793	0	4.4871	3.6421	0.8583	3.0188
1772	ENSG00000167900	TK1	2.4876	2.278	6.3528	5.3813	4.4378	6.5824
1773	ENSG00000268975	MIA-RAB4B	0.3833	0	4.1633	3.6338	2.2282	4.132
1774	ENSG00000101938	CHRDL1	1.2851	1.6987	0.9926	0.5433	5.6875	1.6232
1775	ENSG00000219986	BTF3P7	0	0.4444	0	1.7853	0	4.7002
1776	ENSG00000275365	MMP11	0.5294	0.9827	4.092	1.3111	5.0902	3.303
1777	ENSG00000168938	PPIC	3.7921	3.8699	7.4155	8.1323	7.2391	6.2109
1778	ENSG00000123485	HJURP	0.6652	0.1617	4.7425	3.3433	2.5465	4.2224
1779	ENSG00000225639	PGAM1P2	0.4198	0	0	2.4582	0	4.5103
1780	ENSG00000243279	PRAF2	2.5212	2.5441	6.7769	6.1592	5.8126	4.0659
1781	ENSG00000230119		0	0	4.5452	1.9671	0	0
1782	ENSG00000104332	SFRP1	0.7693	0.4348	2.1631	3.3819	5.5257	2.0325
1783	ENSG00000196205	EEF1A1P5	0.6687	1.1655	2.1969	3.8044	1.9589	5.7032
1784	ENSG00000156804	FBXO32 ENSG00000156804	6.0673	8.3419	2.8176	4.3478	4.691	4.8058
1785	ENSG00000142494	SLC47A1	4.3647	5.0323	1.7678	1.3424	0.7483	0.847
1786	ENSG00000136811	ODF2	2.113	1.9177	6.4493	5.5149	4.5732	5.1955
1787	ENSG00000272414	FAM47E-STBD1	3.9234	4.4536	0.0055	2.2808	1.0712	0.3292
1788	ENSG00000164647	STEAP1	0.2988	0.4166	3.0311	3.5287	4.9034	3.6056
1789	ENSG00000132510	KDM6B	3.2808	2.9385	4.9954	5.4323	8.0226	5.9813
1790	ENSG00000100678	SLC8A3	3.3443	3.1929	1.6243	0.9703	0.2212	5.3187
1791	ENSG00000153558	FBXL2	0.7495	0.9556	4.9126	3.9921	1.4559	4.2688
1792	ENSG00000217239		0	0	0	2.1067	0	4.5007
1793	ENSG00000186847	KRT14	0	0	3.7607	1.0242	0.9932	4.2379
1794	ENSG00000122574	WIPF3	3.6265	4.2909	0.0364	0.2203	0.7377	0.6134
1795	ENSG00000149577	SIDT2	3.6959	3.3525	7.4868	7.258	4.7088	6.8799
1796	ENSG00000087076	HSD17B14	0.2855	0.5021	4.5019	3.7323	3.3407	0.8183
1797	ENSG00000277196		3.5568	3.801	0	0.0618	0.012	0.2144
1798	ENSG00000184009	ACTG1	7.4343	7.1847	11.0964	11.2254	10.8167	10.3485
1799	ENSG00000227081		0	0	3.9633	3.2821	0	2.754
1800	ENSG00000115129	TP53I3	1.57	1.1637	5.2418	3.8805	5.0676	5.1646
1801	ENSG00000111181	SLC6A12	0	0	1.7463	2.0306	2.9095	4.9173
1802	ENSG00000058262	SEC61A1	3.9904	4.5322	7.2163	7.5512	7.4414	8.6743
1803	ENSG00000213983	AP1G2	3.1735	2.9313	7.3466	6.6262	5.6536	6.3869
1804	ENSG00000036672	USP2	5.6157	5.1629	1.9509	1.7518	4.8836	1.8382
1805	ENSG00000237022	HLA-C	4.0648	0	4.0054	2.7843	1.3305	0
1806	ENSG00000234745	HLA-B	2.3378	1.3883	3.0608	4.5561	4.753	6.5142
1807	ENSG00000121310	ECHDC2	7.7057	6.8696	6.9216	5.8724	4.2227	2.829
1808	ENSG00000283963		2.0101	0	3.7452	4.0092	0	0.3091
1809	ENSG00000138061	CYP1B1	0.6869	1.7491	3.0617	2.2754	6.017	1.6312
1810	ENSG00000172197	MBOAT1	0.9669	0.5549	3.1352	5.6149	1.4908	2.7749
1811	ENSG00000160469	BRSK1	0.6141	0.4332	5.1053	3.6239	1.1142	2.1122
1812	ENSG00000172638	EFEMP2	4.8947	5.304	9.2856	9.0572	7.4968	7.9656
1813	ENSG00000235354	RPS29P16	0	0	4.4452	0	2.4686	2.4669
1814	ENSG00000140743	CDR2	1.7379	1.4154	4.4788	5.0316	5.2461	5.6317
1815	ENSG00000187049	TMEM216 ENSG00000187049	1.9135	1.1341	4.7818	5.8908	3.4662	4.9123
1816	ENSG00000170017	ALCAM	0.3704	0.3791	3.0461	3.1682	4.6703	4.2014
1817	ENSG00000117143	UAP1	3.3804	4.0657	5.9719	6.6593	8.258	7.0882
1818	ENSG00000130518	IQCN	1.0295	0.1496	3.9569	4.7755	0.9985	2.9715
1819	ENSG00000167191	GPRC5B	5.053	5.4102	1.0035	1.6704	4.7832	3.5226
1820	ENSG00000198502	HLA-DRB5	4.2956	0	2.7274	0.1988	0	0
1821	ENSG00000236773		0	0	0	0	0	4.5481
1822	ENSG00000184500	PROS1	1.5721	1.5588	3.7603	5.8282	5.0895	2.1112
1823	ENSG00000124466	LYPD3	0.2948	0	1.7148	1.1614	5.0998	0.8667
1824	ENSG00000163815	CLEC3B	5.7489	5.0132	5.3978	3.8698	9.3681	5.9411
1825	ENSG00000161800	RACGAP1	0.8133	1.4667	4.0271	4.4965	2.8453	5.6536
1826	ENSG00000070808	CAMK2A	5.8019	5.4477	2.3274	1.2275	2.5045	4.3065
1827	ENSG00000108984	MAP2K6 ENSG00000108984	3.3681	3.4853	4.5092	6.9994	1.2971	3.8393
1828	ENSG00000142973	CYP4B1	3.4526	3.1273	0	0	0	3.5509
1829	ENSG00000175928	LRRN1 ENSG00000175928	1.0901	3.8673	2.8628	5.4658	2.7167	0.3391
1830	ENSG00000051180	RAD51	0.5852	0.5738	4.3065	2.7285	1.5893	4.8859
1831	ENSG00000116774	OLFML3	2.4334	2.5123	5.8738	4.5508	7.1495	4.7819
1832	ENSG00000259015		0	1.9282	4.9802	1.265	3.9966	3.3598
1833	ENSG00000133321	PLAAT4	3.5117	3.3721	1.8341	0.707	5.4977	0.8134
1834	ENSG00000198598	MMP17	0.9643	1.5811	5.2414	1.0693	3.5499	4.4758
1835	ENSG00000105808	RASA4	7.1747	8.4144	5.76	3.0741	5.2568	4.9465
1836	ENSG00000102575	ACP5	1.2326	0.3363	3.1694	4.9051	3.2839	4.7959
1837	ENSG00000137411	VARS2	2.8286	0	4.1772	2.7579	0	0
1838	ENSG00000269190	FBXO17	1.7074	1.3998	5.6408	4.6521	3.7455	5.5066
1839	ENSG00000119042	SATB2	1.9514	0.2676	5.1124	4.7801	2.6389	3.9554
1840	ENSG00000196954	CASP4	1.6597	2.278	4.166	5.0154	6.0445	1.752
1841	ENSG00000158615	PPP1R15B	1.894	2.1691	2.9942	5.8214	6.2702	3.9794
1842	ENSG00000186493	C5orf38 ENSG00000186493	0.3809	0.2956	2.6187	4.3093	4.3004	3.646
1843	ENSG00000126391	FRMD8	2.1421	2.8974	7.0752	5.4318	4.7309	5.7828
1844	ENSG00000243746	EEF1A1P10	0	0	0	1.0442	0	4.627
1845	ENSG00000089597	GANAB	4.7063	4.7141	7.9142	8.7309	6.7993	8.6753
1846	ENSG00000255519		0	0	0	1.3865	0	4.6022
1847	ENSG00000266028	SRGAP2	2.3075	2.4013	6.5018	6.1634	4.3668	5.5659
1848	ENSG00000168477	TNXB	3.2972	2.4221	0	0.6438	4.8288	3.6682
1849	ENSG00000106823	ECM2	1.7422	0.9777	3.5289	4.4983	5.3853	1.1796
1850	ENSG00000220105		0	0.5802	0	2.2135	0	4.5748
1851	ENSG00000132965	ALOX5AP	0.3188	1.7903	0.383	1.2815	5.2104	2.8955
1852	ENSG00000040608	RTN4R ENSG00000040608	0.6975	0	3.6432	2.3923	1.0886	4.7899
1853	ENSG00000118804	STBD1	5.306	5.3884	2.4465	2.4111	1.1388	1.5961
1854	ENSG00000149294	NCAM1	3.6062	1.7837	6.1024	6.2765	3.5748	6.037
1855	ENSG00000066230	SLC9A3	2.3807	2.7324	6.4196	5.4264	1.6911	3.8009
1856	ENSG00000119333	DYNC2I2	2.0397	2.7598	7.1328	5.2507	4.6822	5.1911
1857	ENSG00000225748	PRRC2A	5.1274	2.1423	6.7044	5.9337	2.9088	3.1372
1858	ENSG00000235847	LDHAP7	0	0	0	1.8946	0.2037	4.5636
1859	ENSG00000061455	PRDM6	0.0649	0.0988	3.6605	4.5873	1.516	1.9652
1860	ENSG00000164953	TMEM67	0.8508	0.145	4.7883	3.9738	3.2025	3.6409
1861	ENSG00000107317	PTGDS	5.477	6.6165	9.3192	4.3404	6.6105	4.4645
1862	ENSG00000151963	ZNF37CP	0	0	4.4229	2.1746	0	0
1863	ENSG00000188706	ZDHHC9	1.4575	2.2319	5.4743	5.5888	5.0114	5.3941
1864	ENSG00000153531	ADPRHL1	6.6944	5.9173	4.8365	2.6613	2.9305	2.3347
1865	ENSG00000256826	ATP5MFP4	0	0	4.2352	3.1695	0	1.5753
1866	ENSG00000001630	CYP51A1	1.9452	1.2006	3.098	4.544	5.3376	5.6879
1867	ENSG00000147689	FAM83A	2.0688	0.0742	1.1906	3.5656	4.4297	4.6209
1868	ENSG00000135506	OS9	5.0637	5.0733	8.5477	8.6224	7.8881	9.1513
1869	ENSG00000179403	VWA1	3.0793	2.6874	7.2651	6.5115	5.0553	5.7427
1870	ENSG00000123219	CENPK	0.2075	0	3.6991	3.4873	2.5179	4.2814
1871	ENSG00000183971	NPW	0.5914	0	4.9879	2.5617	0.7918	2.5759
1872	ENSG00000211674	IGLJ1	0	0	0	0	0	4.5133
1873	ENSG00000114541	FRMD4B ENSG00000114541	0.8155	1.2992	3.5603	3.4998	4.1509	5.7591
1874	ENSG00000256235	SMIM3	1.7338	2.4567	2.177	2.541	6.4871	4.6445
1875	ENSG00000215630	GUSBP9	0	0	4.2319	3.0755	0	2.0276
1876	ENSG00000188322	SBK1	3.638	3.0261	0.7783	0.3855	0.4217	4.5951
1877	ENSG00000088325	TPX2	0.4911	1.423	3.9778	3.8659	3.3083	5.5331
1878	ENSG00000100316	RPL3	7.5849	7.1621	10.5573	10.9822	11.095	11.0046
1879	ENSG00000214063	TSPAN4	4.0925	3.6797	7.796	8.0684	6.2911	6.604
1880	ENSG00000163602	RYBP	0.935	0.9398	2.3575	3.6505	5.8132	2.7719
1881	ENSG00000160211	G6PD	1.4605	1.0303	4.961	4.2871	4.567	5.1728
1882	ENSG00000139194	RBP5	1.1689	0.4071	4.6646	3.5971	4.3653	4.3763
1883	ENSG00000135636	DYSF	5.424	5.1515	2.5405	0.5189	3.8205	4.3065
1884	ENSG00000197702	PARVA	1.4656	1.4033	5.245	5.3536	4.9174	3.8406
1885	ENSG00000100596	SPTLC2	1.36	1.1695	4.2028	5.062	3.8461	5.4539
1886	ENSG00000198300	PEG3	0.1594	0.1476	3.2372	4.2445	0.7386	0.0336
1887	ENSG00000155307	SAMSN1	0.1004	0.2133	0.6408	0.0657	4.6657	0
1888	ENSG00000101400	SNTA1	6.8069	7.7197	4.8369	3.7354	2.8287	5.0391
1889	ENSG00000183598	H3C13	0	0	0	4.2238	1.9347	3.0791
1890	ENSG00000214199	EEF1A1P12	0	0	0.1233	1.1019	0	4.6148
1891	ENSG00000111775	COX6A1	5.2136	4.5309	6.9897	7.7071	8.2081	9.3644
1892	ENSG00000076928	ARHGEF1	4.3329	4.0399	8.2893	6.6925	7.091	8.0927
1893	ENSG00000257767		2.1902	4.5124	2.2319	0	0	0
1894	ENSG00000204455	TRIM51BP	0	0	0	0.0966	0.1339	4.5367
1895	ENSG00000064932	SBNO2	2.5765	3.4689	6.7327	4.8861	7.2099	5.8899
1896	ENSG00000147889	CDKN2A	0.8439	0.2773	4.7721	2.1327	2.9838	0
1897	ENSG00000269907	PTMAP11	0	0	4.1015	2.8234	0	0
1898	ENSG00000254413	CHKB-CPT1B	4.0246	4.2541	0.354	0.8155	1.3487	4.1218
1899	ENSG00000285057		0	0	3.2133	3.8174	0	2.8704
1900	ENSG00000188747	NOXA1	4.7026	3.5518	4.1776	1.7464	0.9291	0.2675
1901	ENSG00000146112	PPP1R18	0.6602	0.6877	4.8447	2.1999	4.0273	4.101
1902	ENSG00000178602	OTOS	0	0	2.4035	4.4121	0	0.3819
1903	ENSG00000124766	SOX4	0.9889	0.8522	2.966	4.5544	5.0878	4.1777
1904	ENSG00000166920	C15orf48	0.4147	0.6518	0	0.1699	4.8465	1.3861
1905	ENSG00000157800	SLC37A3	2.4955	1.5343	5.2765	5.1044	5.9751	5.4938
1906	ENSG00000184985	SORCS2	0.1346	1.4278	3.8463	1.4533	4.7524	3.9352
1907	ENSG00000241913	RPS29P21	0	0	0	0	2.47	4.2648
1908	ENSG00000109610	SOD3	4.0711	3.4664	8.1655	7.0001	5.6159	4.409
1909	ENSG00000128602	SMO	2.3913	2.2032	5.9956	5.9007	3.7381	6.0214
1910	ENSG00000115756	HPCAL1	3.4763	3.3504	6.2916	3.9094	6.0427	7.8039
1911	ENSG00000100889	PCK2	0.855	0.7387	4.5323	3.6366	2.1213	4.9272
1912	ENSG00000120694	HSPH1	3.0922	3.3833	3.0877	6.1282	7.4463	5.1633
1913	ENSG00000136859	ANGPTL2	3.7689	5.4175	8.443	8.418	7.1963	7.1992
1914	ENSG00000089692	LAG3	0.5635	0.6892	2.4655	3.6017	3.293	5.325
1915	ENSG00000179776	CDH5	4.2709	3.7764	1.3973	0	4.7335	3.065
1916	ENSG00000117139	KDM5B	1.2657	1.2714	5.0928	5.189	4.6012	3.8875
1917	ENSG00000219529		1.5829	0	0	2.331	3.8156	4.2611
1918	ENSG00000167766	ZNF83	2.3518	1.5583	6.1698	5.6144	3.7622	4.798
1919	ENSG00000222009	BTBD19	1.823	1.2211	5.7743	4.9005	4.8022	3.9279
1920	ENSG00000090615	GOLGA3	2.8417	2.9783	6.9729	5.9489	4.5591	6.7102
1921	ENSG00000130733	YIPF2	3.4394	3.4122	6.8769	7.0568	5.1742	7.4092
1922	ENSG00000134369	NAV1	1.3626	1.0671	5.3022	3.8735	4.6771	4.6753
1923	ENSG00000142303	ADAMTS10	3.0404	2.8322	6.0665	3.1748	5.772	6.9531
1924	ENSG00000108557	RAI1	2.5962	2.182	6.6472	5.2545	4.1234	6.0218
1925	ENSG00000198089	SFI1	2.5735	1.7712	6.4008	4.0168	4.032	5.9904
1926	ENSG00000276032		1.6907	2.1215	6.4701	4.1005	1.9468	2.8799
1927	ENSG00000072786	STK10 ENSG00000072786	1.6821	2.1234	4.3184	4.099	6.467	5.236
1928	ENSG00000144596	GRIP2	4.9556	3.7629	1.8792	0.6808	1.6766	0.2295
1929	ENSG00000081760	AACS	1.5434	2.7104	5.5369	4.6366	4.6427	6.474
1930	ENSG00000058056	USP13	5.3351	6.2982	2.2192	2.8344	2.0489	2.3966
1931	ENSG00000121039	RDH10 ENSG00000121039	1.9923	2.3066	1.6634	3.9048	6.1256	5.0693
1932	ENSG00000069482	GAL	0	0	2.4345	0.3518	4.526	0.5158
1933	ENSG00000230364	RPL4P3	0	0	0	0.9029	0	4.5533
1934	ENSG00000170558	CDH2	0.2159	0.2105	2.486	1.0471	1.0973	4.9801
1935	ENSG00000184292	TACSTD2	0.1599	0.2299	3.4242	0.9566	4.15	0.0337
1936	ENSG00000280638	CDH12P2	2.4469	0	4.5276	4.6595	3.3595	4.5681
1937	ENSG00000062822	POLD1	2.5366	2.6489	6.6958	4.2618	5.0326	6.5532
1938	ENSG00000254198		0.5771	0	3.9122	3.7494	0	0.9219
1939	ENSG00000156508	EEF1A1	9.5747	8.3733	11.1515	12.473	12.6542	12.6841
1940	ENSG00000188290	HES4	4.7569	3.4079	5.2592	0.4668	5.0474	2.8761
1941	ENSG00000142798	HSPG2	5.7397	5.1666	9.3214	8.6184	7.9055	9.3679
1942	ENSG00000187796	CARD9 ENSG00000187796	0.5924	0.615	4.075	2.1957	2.606	5.1038
1943	ENSG00000150337	FCGR1A ENSG00000150337	0	0.8108	0.6786	2.8778	4.7981	0.7801
1944	ENSG00000124882	EREG	0.0565	0	0	0.3035	4.5503	0.1578
1945	ENSG00000203747	FCGR3A	0.7902	1.061	1.1786	0	4.8812	0
1946	ENSG00000111644	ACRBP	0	0.4171	0.6908	0.4013	3.2043	4.389
1947	ENSG00000087074	PPP1R15A ENSG00000087074	4.5237	5.3308	5.6732	7.7899	9.4698	6.9145
1948	ENSG00000107130	NCS1	0.3342	0.7086	4.4704	2.1671	4.3864	3.5623
1949	ENSG00000122884	P4HA1	4.2941	4.4939	6.5522	8.6796	6.2197	8.187
1950	ENSG00000131979	GCH1	1.0005	0.5516	4.0167	3.3373	5.3159	2.4483
1951	ENSG00000139182	CLSTN3	2.5678	2.1527	6.2892	4.6762	6.0785	5.7617
1952	ENSG00000178904	DPY19L3	1.0217	0.9029	4.4605	5.4491	3.2321	3.1274
1953	ENSG00000203814	H2BC18 ENSG00000203814	0.0678	0.1458	2.3149	4.7091	3.0937	2.9963
1954	ENSG00000166068	SPRED1	0.8881	0.5223	2.75	4.3619	4.8628	3.7939
1955	ENSG00000108452	ZNF29P	0	0	4.4502	0	0	0
1956	ENSG00000267645		0	1.9423	4.4845	2.4682	3.5669	4.9074
1957	ENSG00000106089	STX1A	1.914	0.7306	4.6719	2.7569	5.5011	4.2755
1958	ENSG00000131480	AOC2	0.4953	0.3041	4.4548	3.3565	1.8416	4.141
1959	ENSG00000141576	RNF157	3.7425	5.0982	2.3187	1.2335	0.386	0.9651
1960	ENSG00000034971	MYOC	4.0366	3.4302	0.1438	3.3911	1.0422	0
1961	ENSG00000149554	CHEK1	0.5248	0.4172	4.4441	3.8562	2.2776	4.1289
1962	ENSG00000156381	ANKRD9	6.8586	7.2041	6.0178	3.3128	4.0439	3.1462
1963	ENSG00000107562	CXCL12	5.2483	4.8836	3.8016	1.977	7.4333	5.4049
1964	ENSG00000197136	PCNX3	2.1676	2.2607	6.1215	4.4363	4.6639	6.3754
1965	ENSG00000226260	HLA-DRA	4.4965	0	1.4955	0	0	0
1966	ENSG00000134871	COL4A2	4.2848	4.3335	7.0586	5.161	7.8461	8.3897
1967	ENSG00000143061	IGSF3	0.2913	0.2042	2.9886	2.9689	1.6909	4.9135
1968	ENSG00000259738	ZNF444P1	1.7277	0	4.5929	4.4624	1.5541	3.2334
1969	ENSG00000116729	WLS	2.8176	3.0324	5.1717	6.0751	4.924	7.5799
1970	ENSG00000135048	CEMIP2	1.9555	2.245	3.7222	4.855	6.8345	3.2476
1971	ENSG00000133657	ATP13A3	1.3541	1.6118	3.8194	4.4692	6.1705	3.8452
1972	ENSG00000065809	FAM107B	1.4075	0.917	2.6383	3.5604	5.8863	3.9021
1973	ENSG00000107954	NEURL1	5.527	6.2892	2.4633	2.5626	1.8731	3.1947
1974	ENSG00000179222	MAGED1	4.6698	4.2781	7.921	8.3868	7.452	7.9609
1975	ENSG00000184828	ZBTB7C ENSG00000184828	0.3039	0.4771	4.5665	1.9078	1.8118	4.2095
1976	ENSG00000004777	ARHGAP33	3.3776	1.8419	5.6965	4.4247	3.735	6.9963
1977	ENSG00000000003	TSPAN6	1.9659	1.4429	4.0219	6.5692	3.6192	3.9206
1978	ENSG00000134463	ECHDC3	4.5041	5.2687	3.3554	3.8288	0.6688	1.2989
1979	ENSG00000104419	NDRG1	3.8406	4.1641	6.9848	6.252	8.3067	7.4821
1980	ENSG00000168078	PBK	0	0.0684	3.4633	3.3073	2.3528	4.2437
1981	ENSG00000159674	SPON2	4.2944	4.106	5.9765	3.4248	7.9195	7.1165
1982	ENSG00000109113	RAB34	3.1856	3.1667	6.7452	6.4639	6.6981	6.7906
1983	ENSG00000276701	MIF	6.1442	6.2656	10.0351	8.8757	8.8976	10.2951
1984	ENSG00000143870	PDIA6	4.3628	4.5989	7.4523	8.6785	6.6849	8.1259
1985	ENSG00000163071	SPATA18	0.6078	0.332	4.4993	3.2872	1.4475	0
1986	ENSG00000233426	EIF3FP3	0	0	1.2255	1.6716	0.3537	4.7585
1987	ENSG00000205277	MUC12	0.3953	0.0082	3.7322	1.3227	4.5108	2.2541
1988	ENSG00000167434	CA4	4.0708	2.8102	0	0	0	0.0989
1989	ENSG00000140285	FGF7	1.2087	1.3749	2.678	2.8767	6.2049	2.3863
1990	ENSG00000114812	VIPR1	1.7716	1.265	3.079	5.2936	0.6566	0.5836
1991	ENSG00000025708	TYMP ENSG00000025708	3.722	3.5801	5.7985	1.9882	6.9225	3.2671
1992	ENSG00000179314	WSCD1	3.1579	4.5976	0	0	1.3818	1.6762
1993	ENSG00000251451	GTF2IP9 ENSG00000251451	0.7771	1.6588	3.513	3.4498	0	4.6527
1994	ENSG00000187546	AGMO	0.1988	0.0592	0.9609	4.8322	0.471	0.6982
1995	ENSG00000236649	PPT2	0	1.2243	0.8241	1.4153	5.1436	2.5086
1996	ENSG00000105717	PBX4	0.2243	0.4402	4.5608	2.3919	2.3925	4.1588
1997	ENSG00000141391	PRELID3A	1.0818	0.4567	4.7985	2.4882	2.7772	4.7545
1998	ENSG00000178381	ZFAND2A	2.9427	3.1005	3.6759	4.4037	7.1009	6.6475
[truncated: 23,401 more rows]
